# Supplementary material for: Enantioselective [3+2]-cycloaddition of 2,3-disubstituted cyclobutenones: vicinal quaternary stereocenters construction and skeletal functionalization
Source: Royal Society of Chemistry journal article supplement (doi:10.1039/d3sc02485g), 2023-01-01
Supplement: d3sc02485g1.pdf [file d3sc02485g1.pdf]

# Enantioselective [3+2]-Cycloaddition of 2,3-Disubstituted Cyclobutenones: Vicinal Quaternary Stereocenters Construction and Skeletal Functionalization

Licheng Lu, Ping Lu\*

Research Center for Molecular Recognition and Synthesis, Department of Chemistry, Fudan University, 220 Handan Lu, Shanghai, 200433, China; plu@fudan.edu.cn

## Supporting Information

### Contents

|                                                                               |            |
|-------------------------------------------------------------------------------|------------|
| <b>1. Experiment Procedure and Characterization Data</b>                      |            |
| <b>1.1 General Information</b>                                                | <b>S2</b>  |
| <b>1.2 Summary of Reaction Optimization</b>                                   | <b>S3</b>  |
| <b>1.3 Synthesis of Cyclobutenones and Azomethine Ylides</b>                  | <b>S8</b>  |
| <b>1.4 [3+2] Cycloaddition</b>                                                | <b>S13</b> |
| <b>1.5 Further Transformations of Cycloadducts</b>                            | <b>S32</b> |
| <b>1.6 Proposed Mechanism for the Formation of 17</b>                         | <b>S42</b> |
| <b>1.7 X-ray Data of structure 3a, 5d, 7a, 8-Ts, <i>epi</i>-8, 16, and 17</b> | <b>S43</b> |
| <b>2. Copies of <sup>1</sup>H, <sup>13</sup>C NMR Spectra and HPLC Traces</b> | <b>S50</b> |

# 1. Experiment Procedure and Characterization data

## 1.1 General Information

All reactions were carried out under an inert atmosphere of dry argon in the oven or flame-dried glassware unless the reaction procedure states otherwise. Tetrahydrofuran (THF), toluene, ether (diethyl ether), and dichloromethane were purified from a solvent purification system (Innovative Technology: PS-MD-5, China). Triethylamine was distilled from calcium hydride in a continuous still under an atmosphere of argon. Reaction temperatures were controlled by Heidolph MR Hei-Standard. Analytical thin-layer chromatography (TLC) was performed using pre-coated TLC plates and visualized using combinations of UV, anisaldehyde, ceric ammonium molybdate (CAM), and potassium permanganate. Flash column chromatography was performed using 300-400 mesh silica gel (Huanghai, Shandong) as the stationary phase. Proton and carbon nuclear magnetic resonance spectra were recorded at Bruker-400 MHz spectrometer and Agilent-400 MHz spectrometer. Optical Rotations were measured on a Rudolph Autopol III S2 polarimeter. The enantiomeric excess (*ee*) of the products was determined by chiral stationary phase HPLC (SHIMADZU LC 20AB). HRMS-DART was recorded at Thermo Fisher Scientific LTQ FT Ultra.

### Abbreviations:

Tf = trifluoromethanesulfonyl; TES = triethylsilyl; DBU = 1,8-diazabicyclo[5.4.0]undec-7-ene; (*S*)-DTBM-Segphos = (*S*)-(+)-5,5'-bis[di(3,5-di-*tert*-butyl-4-methoxyphenyl)phosphino]-4,4'-bi-1,3-benzodioxole; TBDPSCl = *tert*-butyldiphenylsilyl chloride; DDQ = 1,2-dichloro-4,5-dicyanobenzoquinone; mCPBA = *meta*-chloroperoxybenzoic acid; TBAF = tetrabutylammonium fluoride; HTIB = phenyliodosohydroxy tosylate; TsCl = *p*-toulenesulfonyl chloride.

## 1.2 Summary of Reaction Optimization

Table S1 Optimization of cycloaddition of **1** with **2a**

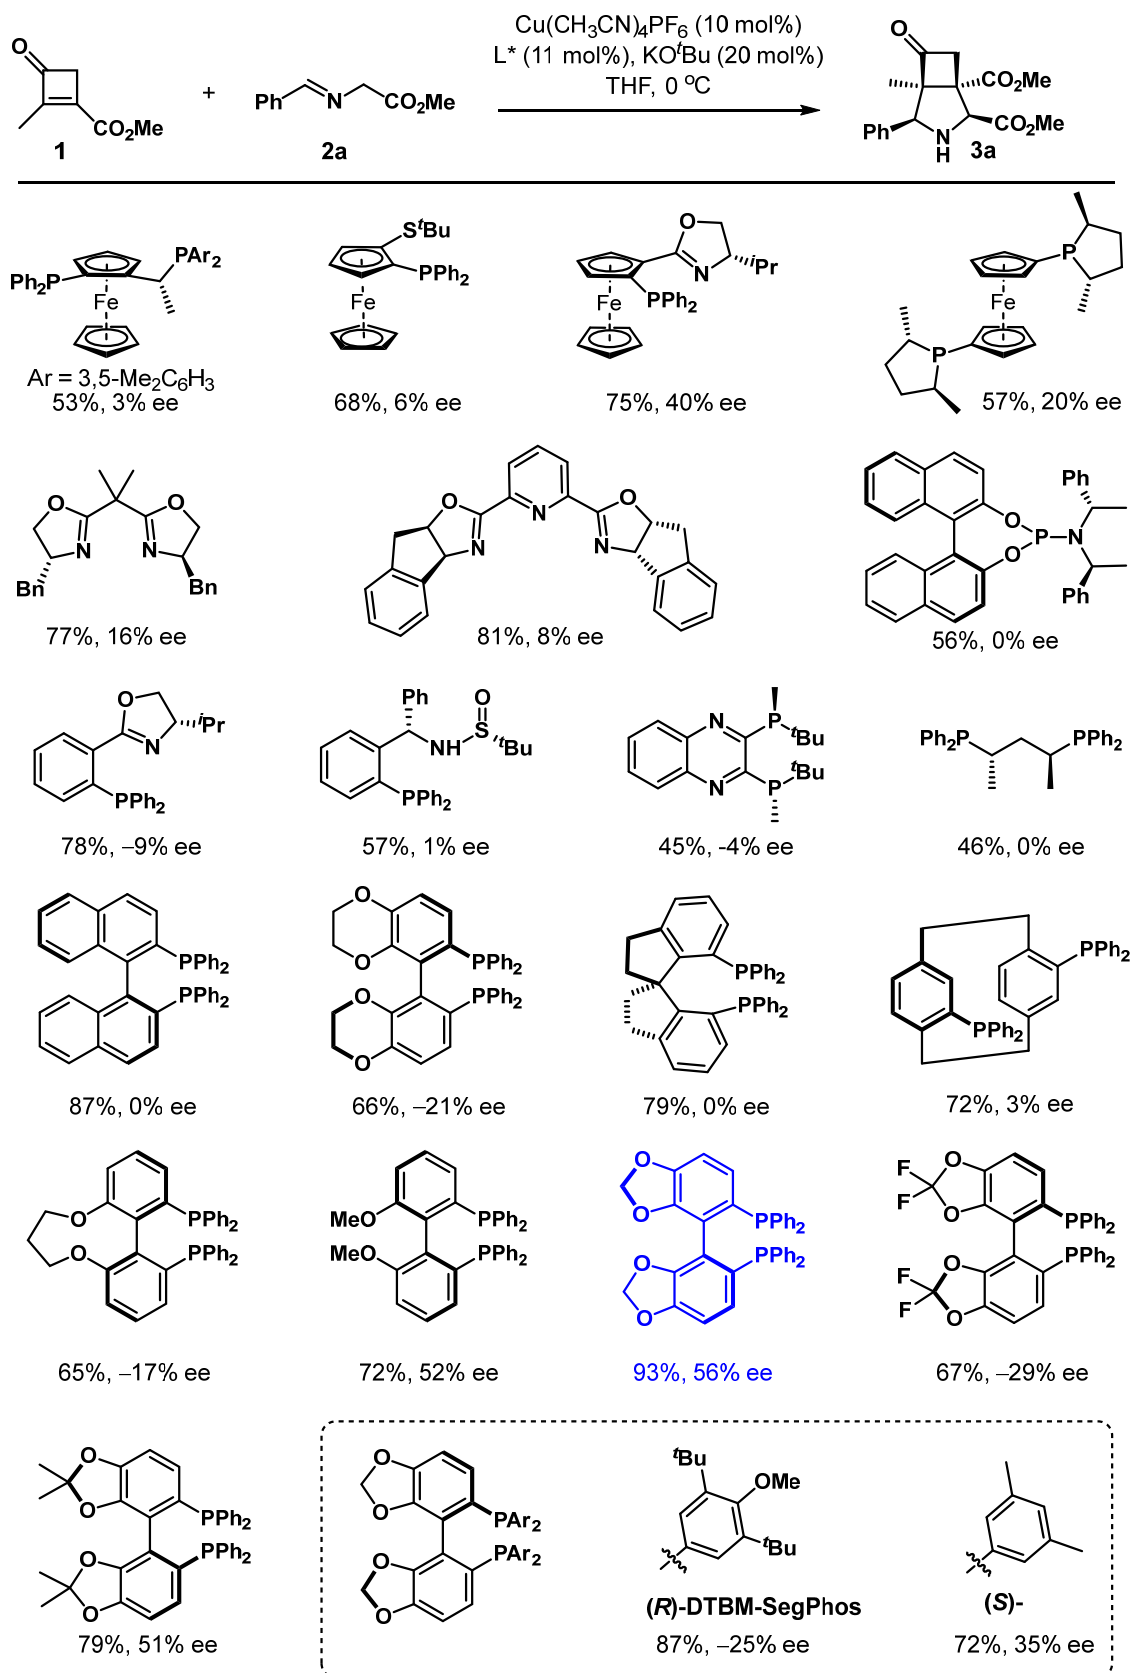

Conditions: **1** (0.2 mmol), **2a** (0.4 mmol), [Cu] (10 mol%),  $\text{L}^*$  (11 mol%), base (20 mol%), THF (4 mL) 0 °C, 8–12 h.

Table S2 Base effect for the cycloaddition of 1 with 2a

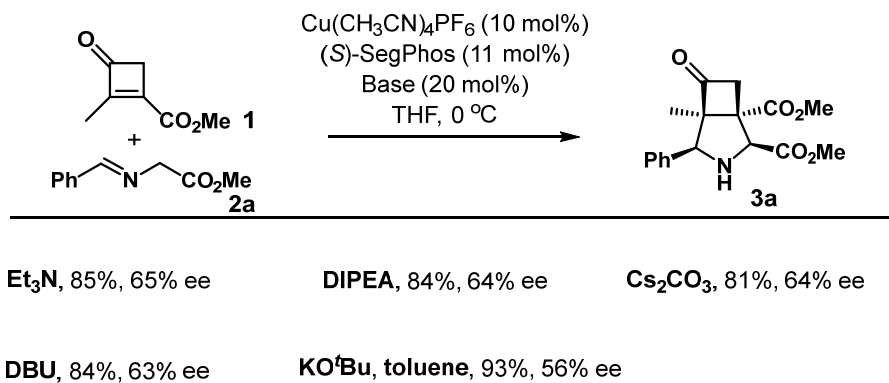

Table S3 Screening of metal catalysts

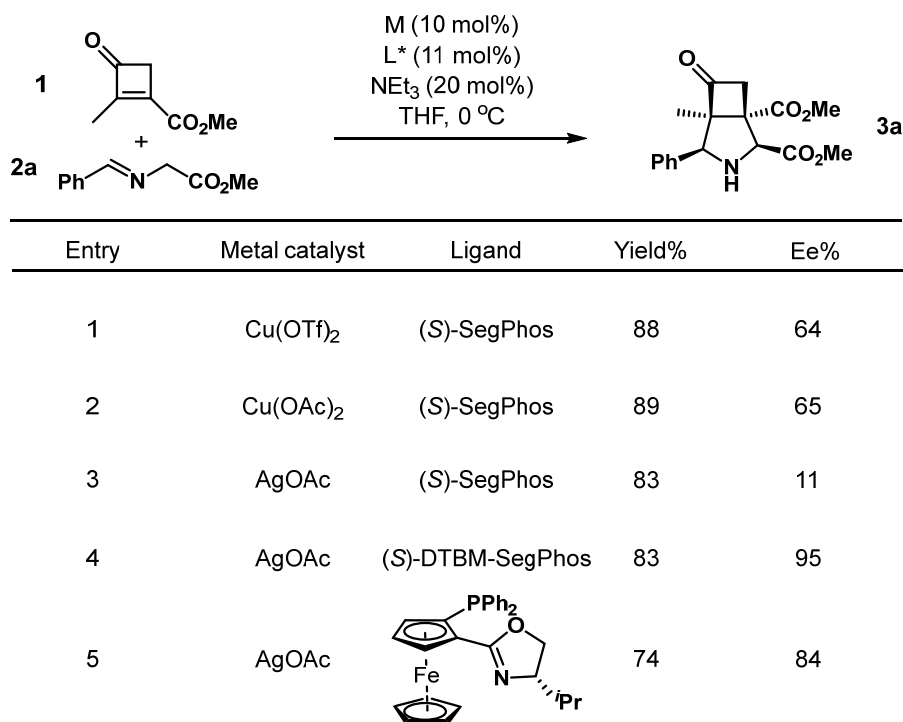

Table S4 Ligand screening for the cycloaddition of **1** with **6h**

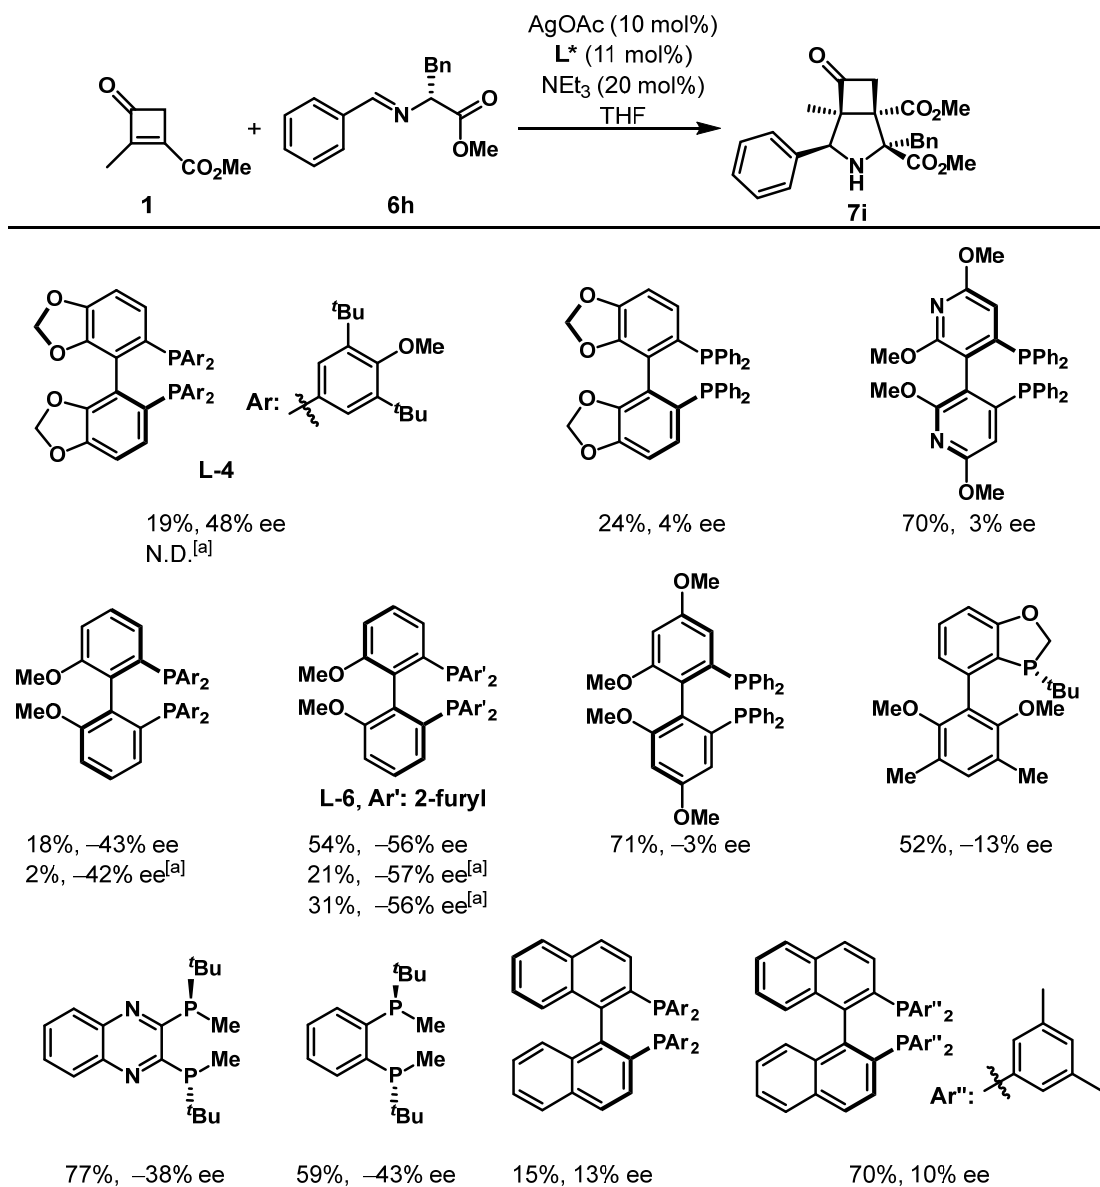

Conditions: **1** (1.0 equiv), **6h** (2.0 equiv), [Ag] (10 mol%), L\* (11 mol%), base (20 mol%), THF (0.05–0.065 M), 0 °C, 9–14 h.

<sup>[a]</sup> Reproducing of the reaction using NEt<sub>3</sub> (20 mol%) as a base.

**Comments:** The Ligands were screened using NEt<sub>3</sub> as a base, and **L-6** gave the best results. However, the yield of reaction was lack of reproducibility, and enantioselectivity was within the margin of error.

**Table S5** Base effect for the cycloaddition of **1** with **6h**

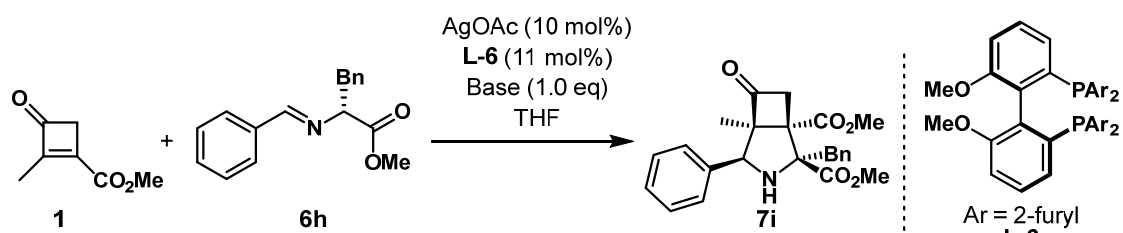

| entry             | Base                            | T (°C) | Yield [%] | Ee [%] |
|-------------------|---------------------------------|--------|-----------|--------|
| 1                 | CsF                             | 0      | 98        | -58    |
| 2                 | K <sub>3</sub> PO <sub>4</sub>  | 0      | 99        | -51    |
| 3                 | KO <sup>t</sup> Bu              | 0      | 66        | 0      |
| 4                 | Imidazole                       | 0      | trace     | -      |
| 5                 | K <sub>2</sub> CO <sub>3</sub>  | 0      | 93        | -59    |
| 6                 | NEt <sub>3</sub>                | 0      | 26        | -53    |
| 7                 | Na <sub>2</sub> CO <sub>3</sub> | 0      | 99        | -59    |
| 8                 | Na <sub>2</sub> CO <sub>3</sub> | -40    | 27        | -46    |
| 9                 | <i>N</i> -methylpiperidine      | 0      | 89        | -61    |
| 10 <sup>[a]</sup> | <i>N</i> -methylpiperidine      | 0      | 37        | -52    |
| 11                | <i>N</i> -methylpiperidine      | -20    | 74        | -65    |

[a] *N*-methylpiperidine (20 mol%) was used.

**Comments:** When strong base *t*-BuOK was used, the background reaction took place smoothly, giving the cycloadduct in 68% yield in the absence of Lewis acid and ligand (not shown).

**Table S6** The cycloaddition of **1** with **6** using  $\text{NEt}_3$  as a base

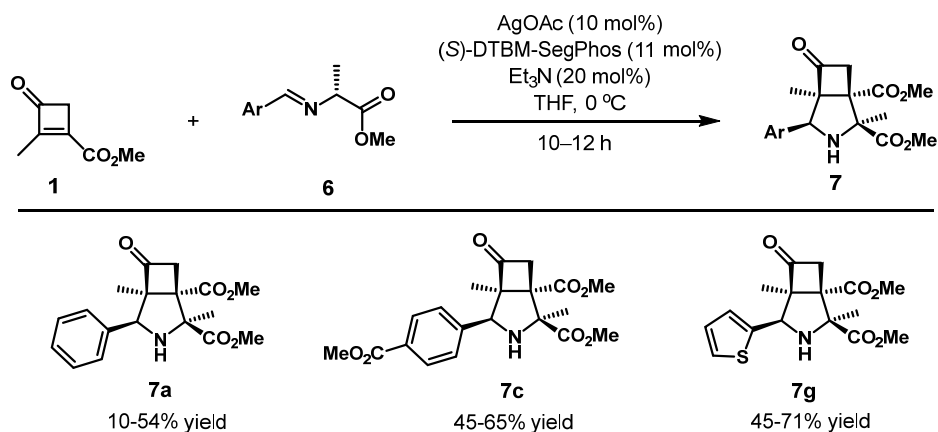

**Comments:** The yield of reaction was lack of reproducibility using  $\text{NEt}_3$  as a base.

**Table S7** The cycloaddition of **1** with **6** in the presence of racemic ligands

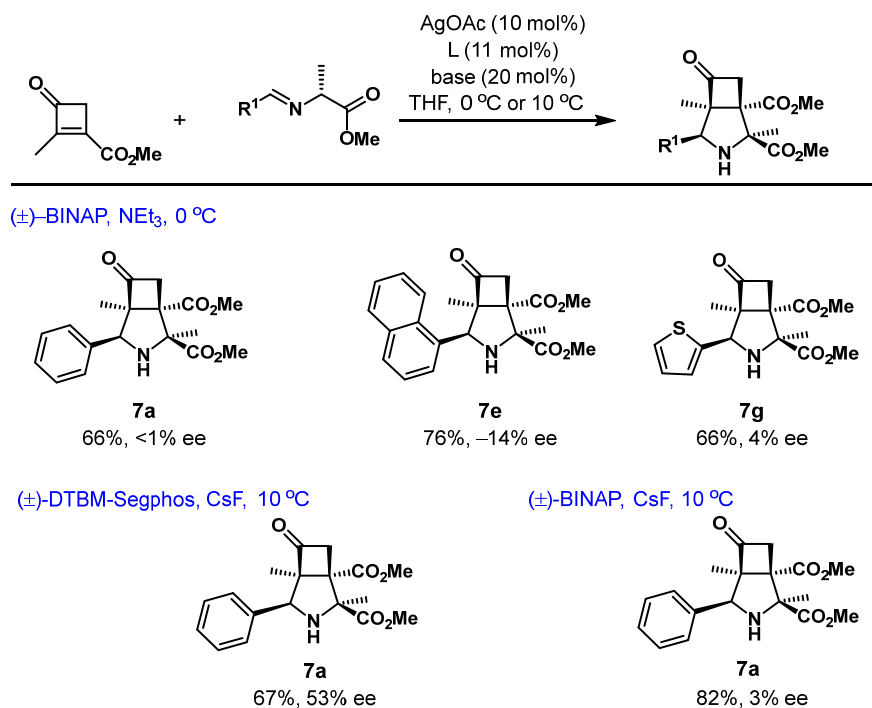

**Comments:** In the presence of  $(\pm)\text{-BINAP}$  and  $\text{NEt}_3$  at  $0\text{ }^\circ\text{C}$ , the reaction of **1** with different substrates **R-6** gave distinct results. In the case of **7e**, up to 14% ee was obtained. The reaction of **1** and **R-6a** gave **7a** in 53% ee when using  $(\pm)\text{-Segphos}$  and  $\text{CsF}$  at  $10\text{ }^\circ\text{C}$ . We attributed these observations to the memory of chirality effect. As suggested by one referee, chiral **R-6a** might act as a chiral ligand in cycloaddition, thus leading to the above results. We cannot rule out this possibility at this point.

## 1.3 Synthesis of Cyclobutenones and Azomethine Ylides

### 1.3.1 General procedure (GP1) for the synthesis of cyclobutenones **1** and **4a**:<sup>1</sup>

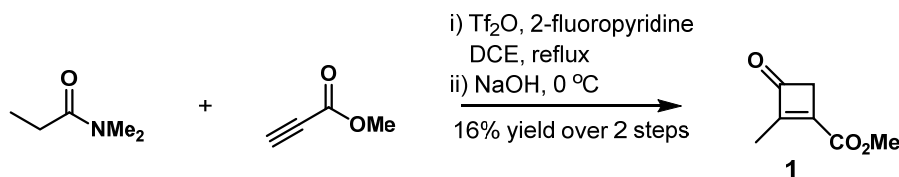

#### Methyl 2-methyl-3-oxocyclobut-1-ene-1-carboxylate (**1**)<sup>2</sup>

2-Fluoropyridine (6.5 mL, 7.28 g, 75.0 mmol) was added dropwise to a solution of *N,N*-dimethylpropionamide (8.2 mL, 7.59 g, 75.0 mmol) in DCE (80 mL) at 0 °C, followed with methyl propiolate (2.2 mL, 2.10 g, 25.0 mmol). Then  $\text{Tf}_2\text{O}$  (12.6 mL, 21.2 g, 75.0 mmol) was added dropwise over 30 min. The resulting solution was stirred at reflux overnight. The resulting mixture was then cooled to 0 °C, and an aqueous solution of NaOH (1 M) was added until pH = 9. The resulting mixture was stirred at 0 °C for 4 h, before diluted with  $\text{H}_2\text{O}$  (20 mL). The reaction mixture was extracted with DCM and the combined organic phase was washed with brine, dried over  $\text{Na}_2\text{SO}_4$ , concentrated, and the residue was purified by column chromatography on silica gel (PE:ether = 30:1) to afford the pure product **1** (0.575 g, 4.10 mmol, 16% yield).

<sup>1</sup>H NMR (400 MHz,  $\text{CDCl}_3$ )  $\delta$  (ppm): 3.87 (s, 3H), 3.39 (d,  $J = 2.3$  Hz, 2H), 1.95 (s, 3H).

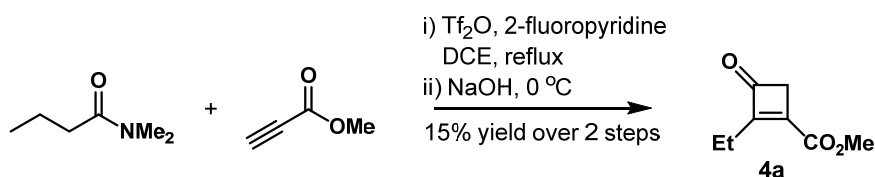

#### Methyl 2-ethyl-3-oxocyclobut-1-ene-1-carboxylate (**4a**)<sup>3</sup>

Prepared according to **General Procedure GP1** using *N,N*-dimethylbutyramide (4.82 g, 41.8 mmol), 2-Fluoropyridine (3.6 mL, 4.05 g, 41.8 mmol), methyl propiolate (1.9 mL, 1.80 g, 21.4 mmol), and  $\text{Tf}_2\text{O}$  (7.0 mL, 11.7 g, 41.5 mmol) in DCE (66 mL) at reflux for 15 h. The reaction mixture was then cooled to 0 °C and an aqueous solution of NaOH (1M) was added until pH = 9. The resulting mixture was stirred at 0 °C for another 4 h; flash chromatography on silica gel (PE/EA = 30/1) afforded **4a** (0.510 g, 3.31 mmol, 15% yield).

<sup>1</sup>H NMR (400 MHz,  $\text{CDCl}_3$ )  $\delta$  (ppm): 3.37 (s, 3H), 3.08 (s, 2H), 2.32 – 2.17 (q,  $J = 7.6$  Hz, 2H), 1.14 – 1.01 (t,  $J = 7.6$  Hz, 3H).

<sup>1</sup>B.-C. Yan, M. Zhou, J. Li, X.-Nian. Li, S.-J. He, J.-P. Zuo, H.-D. Sun, A. Li, P.-T. Puno, *Angew. Chem. Int. Ed.* **2021**, *60*, 12859–12867.

<sup>2</sup>J. Vidal, H. Huet, *J. Org. Chem.* **1988**, *53*, 611–616.

<sup>3</sup>P. Yan, J. Zhang, L. Lu, H. Fang, P. Lu, *Acs Catal.* **2022**, *12*, 15416–15423.



### 1.3.2 General procedure (GP2) for the synthesis of cyclobutenones 4b–4e:

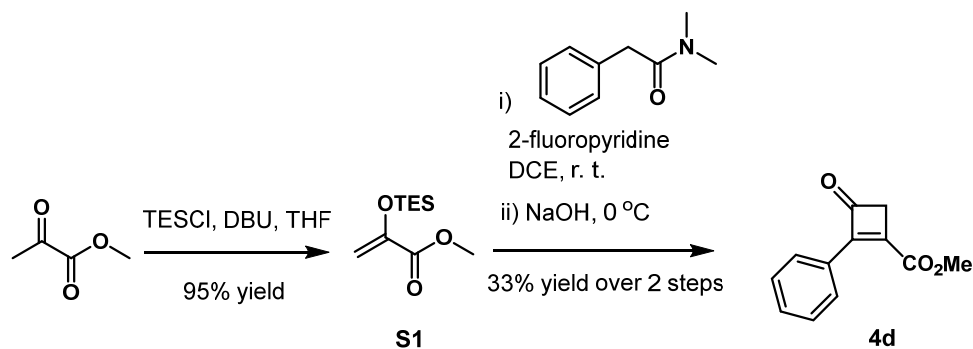

#### Methyl 3-oxo-2-phenylcyclobut-1-ene-1-carboxylate (4d)

To a solution of methyl pyruvate (0.9 mL, 1.02 g, 10.0 mmol) and chlorotriethylsilane (2.1 mL, 1.84 g, 12.2 mmol) in THF (45 mL) was added a solution of DBU (2.2 mL, 2.28 g, 15.0 mmol) in THF (7.5 mL) dropwise. The resulting mixture was stirred at room temperature for 8 h before diluted with Et<sub>2</sub>O (10 mL). The reaction mixture was filtered through a pad of Celite®. The filtrate was washed sequentially with a cold aqueous solution of HCl (1M), H<sub>2</sub>O, brine, dried over Na<sub>2</sub>SO<sub>4</sub>, and concentrated to afford the crude product **S1** (2.06 g, 9.52 mmol, 95% yield), which was directly submitted to the next step without further purification.

<sup>1</sup>H NMR (400 MHz, CDCl<sub>3</sub>) δ (ppm): 5.49 (s, 1H), 4.87 (s, 1H), 3.77 (s, 3H), 0.99 (t, *J* = 7.9 Hz, 9H), 0.72 (q, *J* = 7.9 Hz, 6H).

<sup>13</sup>C NMR (101 MHz, CDCl<sub>3</sub>) δ (ppm): 164.93, 147.27, 103.47, 52.13, 6.50, 4.71.

IR (neat cm<sup>-1</sup>): 2959, 2878, 1736, 1626, 1331, 1199, 1168, 1015.

HRMS-ESI (*m/z*): [M+H]<sup>+</sup> calcd. for C<sub>10</sub>H<sub>21</sub>SiO<sub>3</sub>, 217.1254; found, 217.1255.

To a solution of *N,N*-dimethylphenylacetamide (1.60 g, 9.80 mmol) in DCE (5 mL) at 0 °C was added sequentially 2-fluoropyridine (0.9 mL, 1.02 g, 10.5 mmol) and a solution of **S1** (0.95 g, 4.39 mmol) in DCE (5 mL). Then a solution of Tf<sub>2</sub>O (1.7 mL, 2.85 g, 10.1 mmol) in DCE (8 mL) was added dropwise over 30 min. The resulting mixture was stirred at room temperature for 15 h. The solution was cooled to 0 °C, and an aqueous solution of NaOH (1 M) was added until pH = 9. The resultant solution was stirred at 0 °C for 4 h, before diluted with H<sub>2</sub>O (10 mL). The reaction mixture was extracted with DCM three times. The combined organic phase was washed with brine, dried over Na<sub>2</sub>SO<sub>4</sub>, concentrated, and the residue was purified by column chromatography on silica gel (PE:EA = 15:1) to afford the pure product **4d** (0.293 g, 1.45 mmol, 33% yield).

<sup>1</sup>H NMR (400 MHz, CDCl<sub>3</sub>) δ (ppm): 8.14 (dd, *J* = 6.8, 3.0 Hz, 2H), 7.35 – 7.30 (m, 3H), 3.83 (s, 3H), 3.47 (s, 2H).

<sup>13</sup>C NMR (101 MHz, CDCl<sub>3</sub>) δ (ppm): 189.70, 163.28, 151.62, 146.73, 130.96, 129.53, 128.45, 128.03, 52.30, 49.96.

IR (neat cm<sup>-1</sup>): 2878, 1759, 1712, 1627, 1612, 1489, 1437, 1201, 1179, 1146.

HRMS-EI (*m/z*): [M]<sup>+</sup> calcd. for C<sub>12</sub>H<sub>10</sub>O<sub>3</sub>, 202.0624; found, 202.0624.

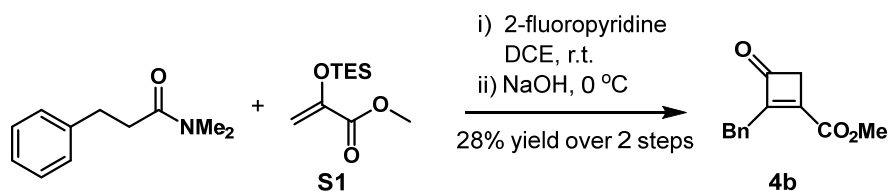

#### Methyl 2-benzyl-3-oxocyclobut-1-ene-1-carboxylate (**4b**)

Prepared according to **General Procedure GP2** using **S1** (0.472 g, 2.18 mmol), *N,N*-dimethyl-3-phenylpropanamide (0.762 g, 4.30 mmol), Tf<sub>2</sub>O (0.72 mL, 1.21 g, 4.30 mmol), 2-fluoropyridine (0.37 mL, 0.417 g, 4.30 mmol) in DCE (8 mL) at room temperature for 10 h. The reaction mixture was then cooled to 0 °C and an aqueous solution of NaOH (1M) was added until pH = 9. The resulting mixture was stirred at 0 °C for another 4 h; flash chromatography on silica gel (PE/EA = 10/1) afforded **4b** (0.133 g, 0.613 mmol, 28% yield).

<sup>1</sup>H NMR (400 MHz, CDCl<sub>3</sub>) δ (ppm): 7.52 – 6.97 (m, 5H), 3.89 (s, 3H), 3.73 (s, 2H), 3.40 (s, 2H).

<sup>13</sup>C NMR (101 MHz, CDCl<sub>3</sub>) δ (ppm): 189.85, 163.10, 157.31, 151.82, 135.86, 128.90, 128.74, 126.81, 52.33, 48.85, 31.01.

IR (neat cm<sup>-1</sup>): 3031, 1766, 1712, 1639, 1601, 1496, 1436, 1239, 1182, 1128.

HRMS-EI (*m/z*): [M]<sup>+</sup> calcd. for C<sub>13</sub>H<sub>12</sub>O<sub>3</sub>, 216.0781; found, 216.0781.

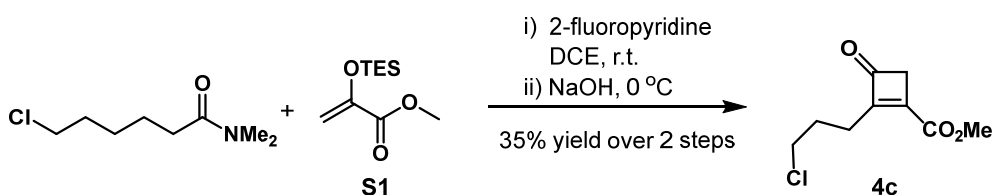

#### Methyl 2-(3-chloropropyl)-3-oxocyclobut-1-ene-1-carboxylate (**4c**)

Prepared according to **General Procedure GP2** using **S1** (1.10 g, 5.07 mmol), 6-chloro-*N,N*-dimethylhexanamide (1.75 g, 10.7 mmol), Tf<sub>2</sub>O (1.68 mL, 2.82 g, 10.0 mmol), 2-fluoropyridine (0.86 mL, 0.970 g, 10.0 mmol) in DCE (16 mL) at room temperature for 10 h. The reaction mixture was then cooled to 0 °C and an aqueous solution of NaOH (1M) was added until pH = 9. The resulting mixture was stirred at 0 °C for another 4 h; flash chromatography on silica gel (PE/EA = 10/1) afforded **4c** (0.357 g, 1.76 mmol, 35% yield).

<sup>1</sup>H NMR (400 MHz, CDCl<sub>3</sub>) δ (ppm): 3.87 (s, 3H), 3.53 (t, *J* = 6.4 Hz, 2H), 3.39 (t, *J* = 1.8 Hz, 2H), 2.56 (tt, *J* = 7.8, 1.8 Hz, 2H), 2.09 – 2.00 (m, 2H).

<sup>13</sup>C NMR (101 MHz, CDCl<sub>3</sub>) δ (ppm): 190.17, 162.99, 158.17, 152.88, 52.34, 48.73, 44.20, 29.17, 22.44.

IR (neat cm<sup>-1</sup>): 2959, 1764, 1715, 1437, 1217, 1130.

HRMS-EI (*m/z*): [M]<sup>+</sup> calcd. for C<sub>9</sub>H<sub>11</sub>ClO<sub>3</sub>, 202.0391; found, 202.0392.

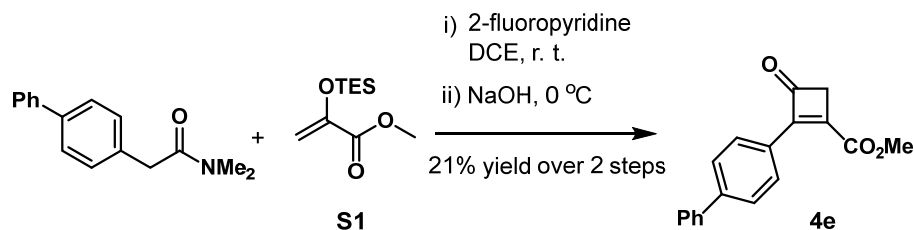

### Methyl 2-([1,1'-biphenyl]-4-yl)-3-oxocyclobut-1-ene-1-carboxylate (**4e**)

Prepared according to **General Procedure GP2** using **S1** (1.63 g, 7.52 mmol), 2-([1,1'-biphenyl]-4-yl)-*N,N*-dimethylacetamide (3.56 g, 14.9 mmol),  $\text{Ti}_2\text{O}$  (2.60 mL, 4.36 g, 15.5 mmol), 2-fluoropyridine (1.30 mL, 1.47 g, 15.1 mmol) in DCE (25 mL) at room temperature for 12 h. The reaction mixture was then cooled to 0 °C and an aqueous solution of NaOH (1M) was added until pH = 9. The resulting mixture was stirred at 0 °C for another 4 h; flash chromatography on silica gel (PE/EA = 10/1) afforded **4e** (0.438 g, 1.57 mmol, 21% yield).

$^1\text{H}$  NMR (400 MHz,  $\text{CDCl}_3$ )  $\delta$  (ppm): 8.37 – 8.27 (m, 2H), 7.71 – 7.55 (m, 4H), 7.52 – 7.42 (m, 2H), 7.42 – 7.34 (m, 1H), 3.95 (s, 3H), 3.61 (s, 2H).

$^{13}\text{C}$  NMR (101 MHz,  $\text{CDCl}_3$ )  $\delta$  (ppm): 190.06, 163.56, 151.57, 146.42, 143.70, 140.11, 130.19, 128.90, 128.00, 127.22, 127.14, 127.01, 52.48, 50.18.

IR (neat  $\text{cm}^{-1}$ ): 2952, 2879, 1760, 1708, 1605, 1483, 1436, 1337, 1200, 1176, 1147.

HRMS-EI ( $m/z$ ):  $[\text{M}]^+$  calcd. for  $\text{C}_{18}\text{H}_{14}\text{O}_3$ , 278.0937; found, 278.0936.

### 1.3.3 The synthesis of azomethine ylides **2** and **6**:<sup>4-5</sup>

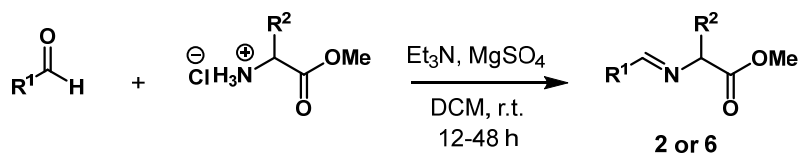

To the suspension of amino acid ester hydrochloride (6.0 mmol, 1.2 equiv.), and  $\text{MgSO}_4$  (0.758 g, 6.25 mmol, 1.25 equiv.) in DCM (10 mL) was added  $\text{Et}_3\text{N}$  (0.84 mL, 6.0 mmol, 1.2 equiv.). The mixture was stirred at room temperature for 1 h. Then the corresponding aldehyde (5.0 mmol, 1.0 equiv.) was added and the mixture was allowed to stir at room temperature for 16 h. Then the reaction mixture was filtrated through a pad of Celite<sup>®</sup>, and the filtrate was washed with water. The aqueous phase was extracted three times with DCM and the combined organic layer was washed once with brine, dried over  $\text{Na}_2\text{SO}_4$ , and concentrated. The  $\alpha$ -iminoesters were used for [3+2]-cycloadditions without further purification. For **6c**, the pure product was obtained via further recrystallization from ethyl acetate/petroleum ether.

<sup>4</sup>M. Potowski, C. Merten, A.P. Antonchick, H. Waldmann, *Chem. Eur. J.* **2015**, *21*, 4913–4917.

<sup>5</sup>M. González-Esguevillas, J. Adrio, J. C. Carretero, *Chem. Commun.* **2013**, *49*, 4649–4651.

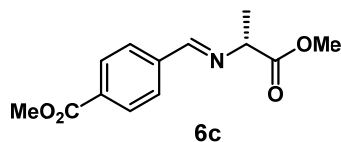

**Methyl (*R,E*)-4-(((1-methoxy-1-oxopropan-2-yl)imino)methyl)benzoate (**6c**)**

Prepared using methyl 4-formylbenzoate (0.816 g, 4.97 mmol), *D*-alanine methyl ester hydrochloride (0.838g, 6.00 mmol), MgSO<sub>4</sub> (0.786 g, 6.53 mmol), and NEt<sub>3</sub> (0.85 mL, 0.619 g, 6.12 mmol) in DCM (10 mL) at room temperature for 24 h. The reaction mixture was worked up to afford the crude product of **6b** (1.19 g, 4.49 mmol, 90% yield). Pure product was obtained via further recrystallization from ethyl acetate/petroleum ether.

[ $\alpha$ ]<sub>D</sub><sup>26</sup> 1.20 (*c* 1.0, CHCl<sub>3</sub>).

<sup>1</sup>H NMR (400 MHz, CDCl<sub>3</sub>)  $\delta$  (ppm): 8.34 (s, 1H), 8.06 (d, *J* = 8.1 Hz, 2H), 7.82 (d, *J* = 8.2 Hz, 2H), 4.18 (q, *J* = 6.8 Hz, 1H), 3.90 (s, 3H), 3.73 (s, 3H), 1.52 (d, *J* = 6.8 Hz, 3H).

<sup>13</sup>C NMR (101 MHz, CDCl<sub>3</sub>)  $\delta$  (ppm): 172.59, 166.46, 161.92, 139.46, 132.14, 129.74, 128.29, 67.92, 52.19, 19.30.

IR (neat, cm<sup>-1</sup>): 1720, 1638, 1432, 1281, 1202, 1107.

HRMS-EI (*m/z*): [M+H]<sup>+</sup> calcd. for C<sub>13</sub>H<sub>16</sub>NO<sub>4</sub>, 250.1074; found, 250.1074.

## 1.4 [3+2] Cycloaddition

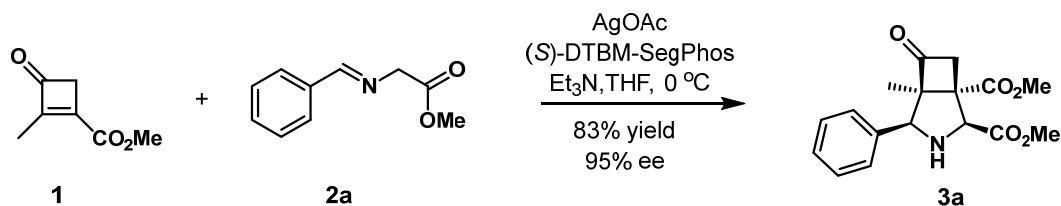

### Dimethyl (1*S*,2*S*,4*S*,5*S*)-5-methyl-6-oxo-4-phenyl-3-azabicyclo[3.2.0]heptane-1,2-dicarboxylate (**3a**)

**General Procedure A:** A suspension of AgOAc (3.5 mg, 21.0  $\mu$ mol) and (*S*)-DTBM-SegPhos (26.4 mg, 22.4  $\mu$ mol) in THF (1 mL) was cooled to 0 °C, and a solution of **2a** (70.7 mg, 0.399 mmol) in THF (1 mL), a solution of NEt<sub>3</sub> (5.6  $\mu$ L, 4.1 mg, 40.0  $\mu$ mol) in THF (0.1 mL), and a solution of **1** (27.7 mg, 0.198 mmol) in THF (1 mL) were sequentially added dropwise. The reaction mixture was stirred at 0 °C for 12 h before quenched with H<sub>2</sub>O and diluted with DCM. The organic layer was separated, and the aqueous phase was extracted with DCM three times. The combined organic phase was washed with brine, dried over Na<sub>2</sub>SO<sub>4</sub>, concentrated and the residue was purified by column chromatography on silica gel (pre-neutralized with 1% NEt<sub>3</sub> in PE, PE:acetone = 8:1) to afford the **3a** (51.9 mg, 0.164 mmol, 83% yield).

Ee: 95% (Chiralcel<sup>®</sup>IC; 10% *i*-PrOH in hexanes; flow rate = 1.0 mL/min, detection at 210 nm; t<sub>1</sub> = 28.0 min (major); t<sub>2</sub> = 33.1 min (minor)).

[ $\alpha$ ]<sub>D</sub><sup>25</sup> -12.5 (c 1.2, CHCl<sub>3</sub>).

<sup>1</sup>H NMR (400 MHz, CDCl<sub>3</sub>)  $\delta$  (ppm): 7.30 – 7.21 (m, 5H), 4.71 (s, 1H), 4.01 (s, 1H), 3.85 (s, 3H), 3.77 (s, 3H), 3.67 (d, *J* = 18.5 Hz, 1H), 3.03 (d, *J* = 18.5 Hz, 1H), 2.62 (brs, 1H), 1.13 (s, 3H).

<sup>13</sup>C NMR (101 MHz, CDCl<sub>3</sub>)  $\delta$  (ppm): 207.04, 171.27, 170.42, 136.02, 128.43, 128.18, 127.43, 79.23, 70.93, 64.53, 52.52, 52.30, 50.70, 49.29, 13.21.

IR (neat, cm<sup>-1</sup>): 3346, 2955, 1781, 1750, 1724, 1433, 1255, 1213, 1103, 703.

HRMS-EI (*m/z*): [M]<sup>+</sup> calcd. for C<sub>17</sub>H<sub>19</sub>NO<sub>5</sub>, 317.1258; found, 317.1259.

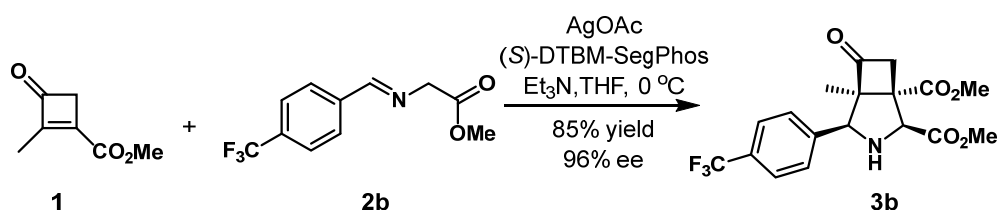

### Dimethyl (1*S*,2*S*,4*S*,5*S*)-5-methyl-6-oxo-4-(4-(trifluoromethyl)phenyl)-3-azabicyclo[3.2.0]heptane-1,2-dicarboxylate (**3b**)

Prepared according to **General Procedure A** using **1** (28.3 mg, 0.202 mmol), **2b** (97.5 mg, 0.398 mmol), AgOAc (4.2 mg, 25.2  $\mu$ mol), NEt<sub>3</sub> (5.6  $\mu$ L, 4.1 mg, 40.0  $\mu$ mol), (*S*)-DTBM-SegPhos (24.4 mg, 20.7  $\mu$ mol) in THF (3.1 mL) at 0 °C for 10 h; flash chromatography on silica gel (pre-neutralized with 1% NEt<sub>3</sub> in PE, PE:EA = 6:1) provided **3b** (66.2 mg, 0.172 mmol, 85% yield).

Ee: 96% (Chiralcel<sup>®</sup>AD-H; 5% *i*-PrOH in hexanes; flow rate = 1.0 mL/min, detection at 210 nm;  $t_1$  = 19.8 min (major);  $t_2$  = 22.0 min (minor)).

$[\alpha]_D^{31}$  -4.2 (c 1.1, CHCl<sub>3</sub>).

<sup>1</sup>H NMR (400 MHz, CDCl<sub>3</sub>)  $\delta$  (ppm): 7.56 (d,  $J$  = 8.0 Hz, 2H), 7.42 (d,  $J$  = 8.1 Hz, 2H), 4.72 (s, 1H), 4.06 (s, 1H), 3.85 (s, 3H), 3.76 (s, 3H), 3.69 (d,  $J$  = 18.6 Hz, 1H), 3.01 (d,  $J$  = 18.6 Hz, 1H), 2.66 (brs, 1H), 1.13 (s, 3H).

<sup>13</sup>C NMR (101 MHz, CDCl<sub>3</sub>)  $\delta$  (ppm): 206.83, 171.03, 170.20, 140.20, 130.48 (q,  $J$  = 32.4 Hz), 127.82, 125.13 (q,  $J$  = 3.8 Hz), 123.98 (q,  $J$  = 272.1 Hz), 78.71, 70.11, 64.51, 52.66, 52.40, 50.46, 49.42, 13.00.

<sup>19</sup>F NMR (376 MHz, CDCl<sub>3</sub>)  $\delta$  (ppm): -62.54.

IR (neat, cm<sup>-1</sup>): 1781, 1750, 1724, 1622, 1439, 1324, 1114.

HRMS-EI ( $m/z$ ): [M]<sup>+</sup> calcd. for C<sub>18</sub>H<sub>18</sub>F<sub>3</sub>NO<sub>5</sub>, 385.1132; found, 385.1125.

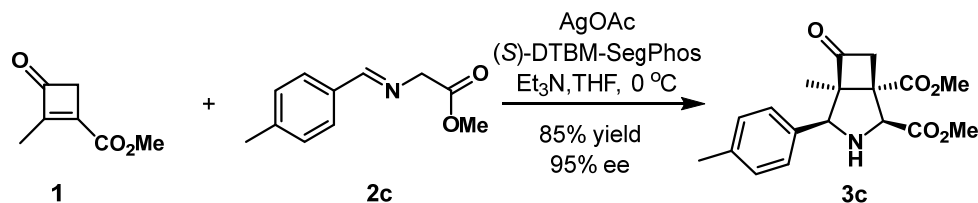

#### Dimethyl (1*S*,2*S*,4*S*,5*S*)-5-methyl-6-oxo-4-(*p*-tolyl)-3-azabicyclo[3.2.0]heptane-1,2-dicarboxylate (**3c**)

Prepared according to **General Procedure A** using **1** (27.9 mg, 0.199 mmol), **2c** (76.3 mg, 0.399 mmol), AgOAc (3.3 mg, 19.8  $\mu$ mol), NEt<sub>3</sub> (5.6  $\mu$ L, 4.1 mg, 40.0  $\mu$ mol), (*S*)-DTBM-SegPhos (25.3 mg, 23.0  $\mu$ mol) in THF (3.1 mL) at 0 °C for 10 h; flash chromatography on silica gel (pre-neutralized with 1% NEt<sub>3</sub> in PE, PE:EA = 6:1) provided **3c** (56.2 mg, 0.170 mmol, 85% yield).

Ee: 95% (Chiralcel<sup>®</sup>IC; 20% *i*-PrOH in hexanes; flow rate = 1.0 mL/min, detection at 210 nm;  $t_1$  = 18.7 min (major);  $t_2$  = 22.2 min (minor)).

$[\alpha]_D^{30}$  2.9 (c 1.2, CHCl<sub>3</sub>).

<sup>1</sup>H NMR (400 MHz, CDCl<sub>3</sub>)  $\delta$  (ppm): 7.21 – 7.15 (m, 2H), 7.15 – 7.07 (m, 2H), 4.70 (d,  $J$  = 4.4 Hz, 1H), 3.98 (d,  $J$  = 4.0 Hz, 1H), 3.85 (s, 3H), 3.77 (s, 3H), 3.66 (d,  $J$  = 18.5 Hz, 1H), 3.02 (d,  $J$  = 18.5 Hz, 1H), 2.59 (brs, 1H), 2.33 (s, 3H), 1.12 (s, 3H).

<sup>13</sup>C NMR (101 MHz, CDCl<sub>3</sub>)  $\delta$  (ppm): 207.33, 171.34, 170.50, 138.17, 132.94, 128.95, 127.32, 79.26, 70.82, 64.52, 52.54, 52.34, 50.71, 49.27, 21.15, 13.23.

IR (neat cm<sup>-1</sup>): 3332, 2961, 2879, 1789, 1745, 1724, 1627, 1507, 1379, 1323, 1206, 1176.

HRMS-EI ( $m/z$ ): [M]<sup>+</sup> calcd. for C<sub>18</sub>H<sub>21</sub>NO<sub>5</sub>, 331.1414; found, 331.1415.

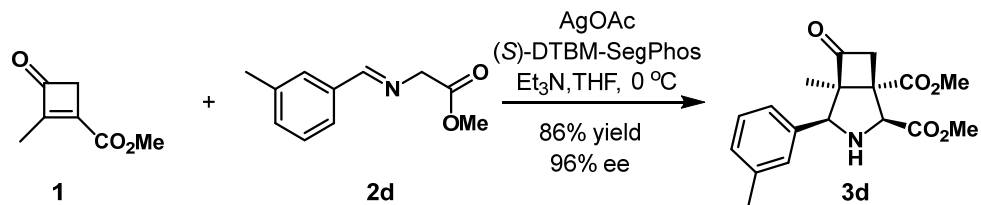

#### Dimethyl (1*S*,2*S*,4*S*,5*S*)-5-methyl-6-oxo-4-(*m*-tolyl)-3-azabicyclo[3.2.0]heptane-1,2-dicarboxylate (**3d**)

Prepared according to **General Procedure A** using **1** (28.4 mg, 0.203 mmol), **2d** (76.7 mg, 0.408 mmol), AgOAc (3.6 mg, 21.6  $\mu$ mol), NEt<sub>3</sub> (5.6  $\mu$ L, 4.1 mg, 40.0  $\mu$ mol), (*S*)-DTBM-SegPhos (25.3 mg, 21.4  $\mu$ mol) in THF (3.1 mL) at 0 °C for 12 h; flash chromatography on silica gel (pre-neutralized with 1% NEt<sub>3</sub> in PE, PE:EA = 6:1) provided **3d** (58.0 mg, 0.175 mmol, 86% yield).

Ee: 96% (Chiralcel<sup>®</sup>IC; 10% *i*-PrOH in hexanes; flow rate = 1.0 mL/min, detection at 210 nm; t<sub>1</sub> = 27.9 min (major); t<sub>2</sub> = 34.0 min (minor)).

[ $\alpha$ ]<sub>D</sub><sup>21</sup> -10.9 (c 1.1, CHCl<sub>3</sub>).

<sup>1</sup>H NMR (400 MHz, CDCl<sub>3</sub>)  $\delta$  (ppm): 7.24 – 7.17 (m, 1H), 7.15 – 7.05 (m, 3H), 4.70 (d, *J* = 4.2 Hz, 1H), 3.98 (d, *J* = 3.8 Hz, 1H), 3.85 (s, 3H), 3.77 (s, 3H), 3.66 (d, *J* = 18.5 Hz, 1H), 3.03 (d, *J* = 18.4 Hz, 1H), 2.60 (brs, 1H), 2.33 (s, 3H), 1.13 (s, 3H).

<sup>13</sup>C NMR (101 MHz, CDCl<sub>3</sub>)  $\delta$  (ppm): 207.09, 171.29, 170.47, 137.76, 135.90, 129.22, 128.03, 124.53, 79.23, 70.90, 64.50, 52.51, 52.31, 50.67, 49.23, 21.35, 13.24.

IR (neat cm<sup>-1</sup>): 2976, 2885, 1781, 1751, 1721, 1609, 1437, 1376, 1324, 1242, 1201, 1171, 1051.

HRMS-EI (*m/z*): [M]<sup>+</sup> calcd. for C<sub>18</sub>H<sub>21</sub>NO<sub>5</sub>, 331.1414; found, 331.1415.

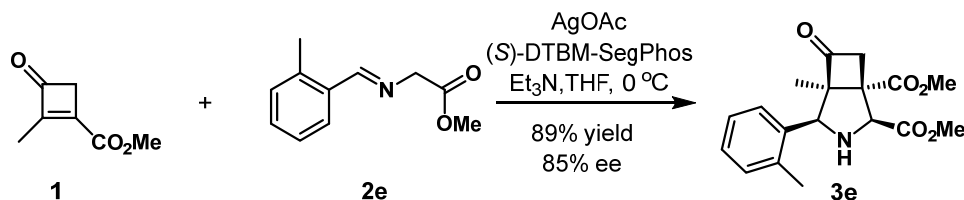

#### Dimethyl (1*S*,2*S*,4*S*,5*S*)-5-methyl-6-oxo-4-(*o*-tolyl)-3-azabicyclo[3.2.0]heptane-1,2-dicarboxylate (**3e**)

Prepared according to **General Procedure A** using **1** (28.0 mg, 0.200 mmol), **2e** (76.7 mg, 0.401 mmol), AgOAc (3.1 mg, 18.6  $\mu$ mol), NEt<sub>3</sub> (5.6  $\mu$ L, 4.1 mg, 40.0  $\mu$ mol), (*S*)-DTBM-SegPhos (29.0 mg, 23.8  $\mu$ mol) in THF (3.1 mL) at 0 °C for 12 h; flash chromatography on silica gel (pre-neutralized with 1% NEt<sub>3</sub> in PE, PE:EA = 6:1) provided **3e** (58.9 mg, 0.178 mmol, 89% yield).

Ee: 85% (Chiralcel<sup>®</sup>IC; 10% *i*-PrOH in hexanes; flow rate = 1.0 mL/min, detection at 210 nm; t<sub>1</sub> = 31.9 min (major); t<sub>2</sub> = 38.4 min (minor)).

[ $\alpha$ ]<sub>D</sub><sup>22</sup> -15.1 (c 1.2, CHCl<sub>3</sub>).

<sup>1</sup>H NMR (400 MHz, CDCl<sub>3</sub>)  $\delta$  (ppm): 7.44 – 7.35 (m, 1H), 7.22 – 7.07 (m, 3H), 4.73 (s, 1H), 4.41 (s, 1H), 3.86 (s, 3H), 3.77 (s, 3H), 3.69 (d, *J* = 18.5 Hz, 1H), 3.08 (d, *J* = 18.5 Hz, 1H), 2.53 (brs, 1H), 2.35 (s, 3H), 1.14 (s, 3H).

$^{13}\text{C}$  NMR (101 MHz,  $\text{CDCl}_3$ )  $\delta$  (ppm): 207.34, 171.33, 170.45, 135.77, 133.91, 130.54, 128.17, 127.99, 125.83, 80.38, 65.91, 64.75, 52.58, 52.36, 50.84, 49.29, 19.91, 13.61.

IR (neat  $\text{cm}^{-1}$ ): 3332, 3203, 2976, 2878, 1779, 1742, 1732, 1627, 1439, 1326, 1201.

HRMS-EI ( $m/z$ ):  $[\text{M}]^+$  calcd. for  $\text{C}_{18}\text{H}_{21}\text{NO}_5$ , 331.1414; found, 331.1416.

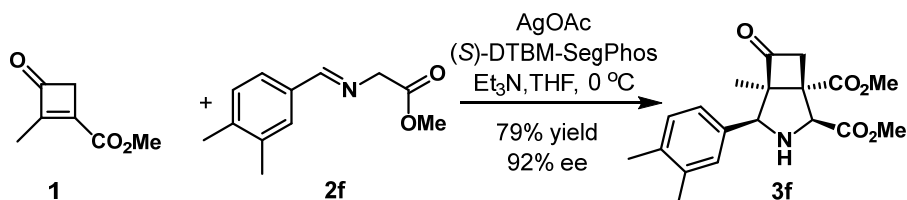

### Dimethyl (1*S*,2*S*,4*S*,5*S*)-4-(3,4-dimethylphenyl)-5-methyl-6-oxo-3-azabicyclo[3.2.0]heptane-1,2-dicarboxylate (**3f**)

Prepared according to **General Procedure A** using **1** (28.3 mg, 0.202 mmol), **2f** (84.4 mg, 0.411 mmol), AgOAc (4.6 mg, 27.6  $\mu\text{mol}$ ),  $\text{NEt}_3$  (5.6  $\mu\text{L}$ , 4.1 mg, 40.0  $\mu\text{mol}$ ), (S)-DTBM-SegPhos (26.2 mg, 22.2  $\mu\text{mol}$ ) in THF (3.1 mL) at  $0\text{ }^\circ\text{C}$  for 9 h; flash chromatography on silica gel (pre-neutralized with 1%  $\text{NEt}_3$  in PE, PE:EA = 6:1) provided **3f** (55.1 mg, 0.160 mmol, 79% yield).

Ee: 92% (Chiralcel<sup>®</sup>OD-H; 5% *i*-PrOH in hexanes; flow rate = 1.0 mL/min, detection at 210 nm;  $t_1$  = 18.8 min (minor);  $t_2$  = 30.3 min (major)).

$[\alpha]_D^{33}$  4.3 (c 1.1,  $\text{CHCl}_3$ ).

$^1\text{H}$  NMR (400 MHz,  $\text{CDCl}_3$ )  $\delta$  (ppm): 7.10 – 6.98 (m, 3H), 4.68 (d,  $J$  = 3.5 Hz, 1H), 3.95 (d,  $J$  = 3.1 Hz, 1H), 3.85 (s, 3H), 3.77 (s, 3H), 3.65 (d,  $J$  = 18.5 Hz, 1H), 3.03 (d,  $J$  = 18.5 Hz, 1H), 2.57 (t,  $J$  = 4.5 Hz, 1H), 2.23 (s, 6H), 1.12 (s, 3H).

$^{13}\text{C}$  NMR (101 MHz,  $\text{CDCl}_3$ )  $\delta$  (ppm): 207.37, 171.34, 170.53, 136.78, 136.35, 133.30, 129.47, 128.58, 124.83, 79.27, 70.82, 64.49, 52.51, 52.32, 50.70, 49.18, 19.73, 19.46, 13.25.

IR (neat  $\text{cm}^{-1}$ ): 3008, 1780, 1747, 1721, 1440, 1329, 1250, 1215, 1013.

HRMS-EI ( $m/z$ ):  $[\text{M}]^+$  calcd. for  $\text{C}_{19}\text{H}_{23}\text{NO}_5$ , 345.1571; found, 345.1569.

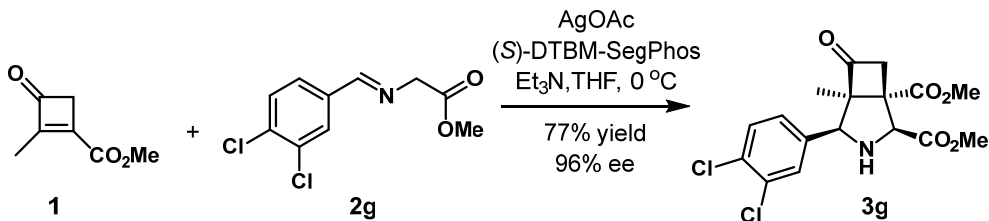

### Dimethyl (1*S*,2*S*,4*S*,5*S*)-4-(3,4-dichlorophenyl)-5-methyl-6-oxo-3-azabicyclo[3.2.0]heptane-1,2-dicarboxylate (**3g**)

Prepared according to **General Procedure A** using **1** (28.3 mg, 0.202 mmol), **2g** (99.0 mg, 0.402 mmol), AgOAc (4.4 mg, 26.3  $\mu\text{mol}$ ),  $\text{NEt}_3$  (5.6  $\mu\text{L}$ , 4.1 mg, 40.0  $\mu\text{mol}$ ), (S)-DTBM-SegPhos (25.4 mg, 21.5  $\mu\text{mol}$ ) in THF (3.1 mL) at  $0\text{ }^\circ\text{C}$  for 8 h; flash chromatography on silica gel (pre-neutralized with 1%  $\text{NEt}_3$  in PE, PE:EA = 6:1) provided **3g** (60.1 mg, 0.156 mmol, 77% yield).



Ee: 96% (Chiralcel<sup>®</sup>IC; 10% *i*-PrOH in hexanes; flow rate = 1.0 mL/min, detection at 210 nm;  $t_1$  = 21.3 min (major);  $t_2$  = 30.0 min (minor)).

$[\alpha]_D^{28}$  17.9 (c 1.0, CHCl<sub>3</sub>).

<sup>1</sup>H NMR (400 MHz, CDCl<sub>3</sub>)  $\delta$  (ppm): 7.42 – 7.31 (m, 2H), 7.14 (dd,  $J$  = 8.3, 2.1 Hz, 1H), 4.69 (d,  $J$  = 2.8 Hz, 1H), 3.95 (s, 1H), 3.84 (s, 3H), 3.76 (s, 3H), 3.68 (d,  $J$  = 18.7 Hz, 1H), 2.98 (d,  $J$  = 18.6 Hz, 1H), 2.60 (brs, 1H), 1.12 (s, 3H).

<sup>13</sup>C NMR (101 MHz, CDCl<sub>3</sub>)  $\delta$  (ppm): 206.74, 170.96, 170.11, 136.48, 132.39, 132.36, 130.18, 129.26, 126.68, 78.50, 69.39, 64.39, 52.68, 52.43, 50.36, 49.47, 13.01.

IR (neat, cm<sup>-1</sup>): 1777, 1751, 1724, 1438, 1325, 1231, 1108, 1067, 1030.

HRMS-ESI ( $m/z$ ):  $[M+H]^+$  calcd. for C<sub>17</sub>H<sub>18</sub>Cl<sub>2</sub>NO<sub>5</sub>, 386.0557; found, 386.0555.

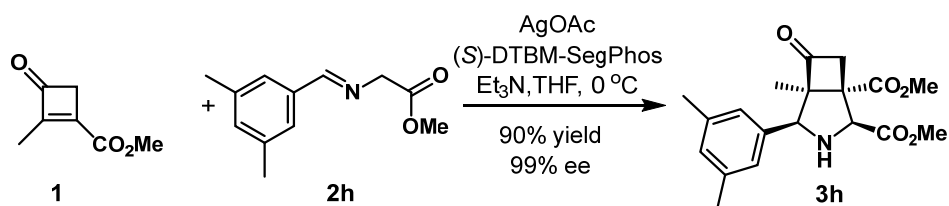

#### Dimethyl (1*S*,2*S*,4*S*,5*S*)-4-(3,5-dimethylphenyl)-5-methyl-6-oxo-3-azabicyclo[3.2.0]heptane-1,2-dicarboxylate (**3h**)

Prepared according to **General Procedure A** using **1** (28.5 mg, 0.203 mmol), **2h** (82.4 mg, 0.401 mmol), AgOAc (3.9 mg, 23.4  $\mu$ mol), NEt<sub>3</sub> (5.6  $\mu$ L, 4.1 mg, 40.0  $\mu$ mol), (*S*)-DTBM-SegPhos (25.6 mg, 21.7  $\mu$ mol) in THF (3.1 mL) at 0 °C for 11 h; flash chromatography on silica gel (pre-neutralized with 1% NEt<sub>3</sub> in PE, PE:EA = 6:1) provided **3h** (63.0 mg, 0.182 mmol, 90% yield).

Ee: 99% (Chiralcel<sup>®</sup>IC; 2.5% *i*-PrOH in hexanes; flow rate = 1.0 mL/min, detection at 210 nm;  $t_1$  = 60.0 min (major);  $t_2$  = 94.1 min (minor)).

$[\alpha]_D^{32}$  -7.3 (c 1.3, CHCl<sub>3</sub>).

<sup>1</sup>H NMR (400 MHz, CDCl<sub>3</sub>)  $\delta$  (ppm): 6.97 – 6.85 (m, 3H), 4.69 (s, 1H), 3.94 (s, 1H), 3.85 (s, 3H), 3.77 (s, 3H), 3.65 (d,  $J$  = 18.5 Hz, 1H), 3.04 (d,  $J$  = 18.4 Hz, 1H), 2.58 (brs, 1H), 2.29 (s, 6H), 1.13 (s, 3H).

<sup>13</sup>C NMR (101 MHz, CDCl<sub>3</sub>)  $\delta$  (ppm): 207.18, 171.35, 170.56, 137.66, 135.84, 130.22, 125.21, 79.31, 70.95, 64.52, 52.54, 52.36, 50.72, 49.22, 21.26, 13.32.

IR (neat cm<sup>-1</sup>): 1780, 1745, 1732, 1369, 1324, 1219, 1033, 1000.

HRMS-EI ( $m/z$ ):  $[M]^+$  calcd. for C<sub>19</sub>H<sub>23</sub>NO<sub>5</sub>, 345.1571; found, 345.1567.

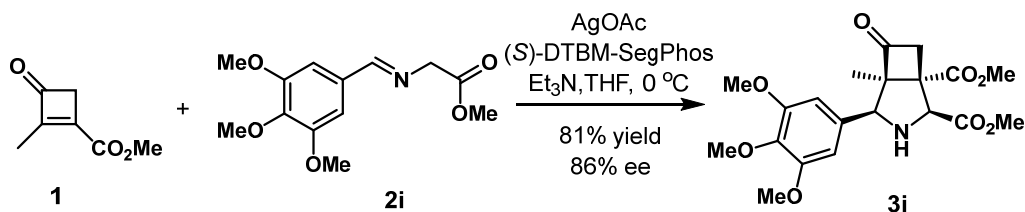

### Dimethyl (1*S*,2*S*,4*S*,5*S*)-5-methyl-6-oxo-4-(3,4,5-trimethoxyphenyl)-3-azabicyclo[3.2.0]heptane-1,2-dicarboxylate (**3i**)

Prepared according to **General Procedure A** using **1** (27.9 mg, 0.199 mmol), **2i** (107.4 mg, 0.402 mmol), AgOAc (3.3 mg, 20.0  $\mu$ mol), NEt<sub>3</sub> (5.6  $\mu$ L, 4.1 mg, 40.0  $\mu$ mol), (*S*)-DTBM-SegPhos (25.9 mg, 22.0  $\mu$ mol) in THF (3.1 mL) at 0 °C for 9 h; flash chromatography on silica gel (pre-neutralized with 1% NEt<sub>3</sub> in PE, PE:EA = 6:1) provided **3i** (66.0 mg, 0.162 mmol, 81% yield).

Ee: 86% (Chiralcel<sup>®</sup>IC; 30% *i*-PrOH in hexanes; flow rate = 1.0 mL/min, detection at 210 nm; t<sub>1</sub> = 42.8 min (major); t<sub>2</sub> = 68.2 min (minor)).

[ $\alpha$ ]<sub>D</sub><sup>30</sup> 0.32 (c 1.2, CHCl<sub>3</sub>).

<sup>1</sup>H NMR (400 MHz, CDCl<sub>3</sub>)  $\delta$  (ppm): 6.48 (s, 2H), 4.66 (s, 1H), 3.90 (s, 1H), 3.82 (s, 3H), 3.80 (s, 3H), 3.79 (s, 6H), 3.74 (s, 3H), 3.64 (d, *J* = 18.5 Hz, 1H), 2.99 (d, *J* = 18.5 Hz, 1H), 2.59 (brs, 1H), 1.11 (s, 3H).

<sup>13</sup>C NMR (101 MHz, CDCl<sub>3</sub>)  $\delta$  (ppm): 207.23, 171.15, 170.30, 152.84, 137.83, 131.47, 104.57, 78.87, 71.10, 64.35, 60.66, 56.03, 52.51, 52.27, 50.32, 49.21, 13.18.

IR (neat, cm<sup>-1</sup>): 3337, 1783, 1723, 1591, 1216, 1132, 1013.

HRMS-EI (*m/z*): [M]<sup>+</sup> calcd. for C<sub>20</sub>H<sub>25</sub>NO<sub>8</sub>, 407.1575; found, 407.1576.

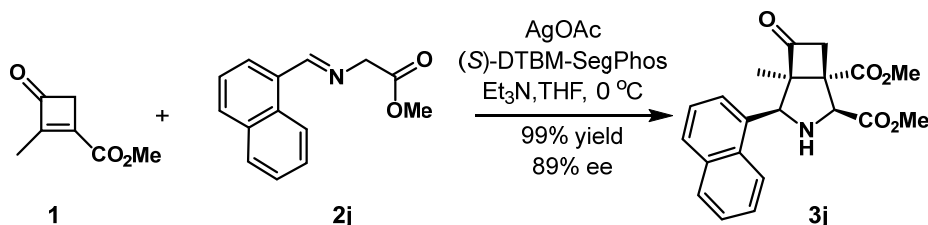

### Dimethyl (1*S*,2*S*,4*S*,5*S*)-5-methyl-4-(naphthalen-1-yl)-6-oxo-3-azabicyclo[3.2.0]heptane-1,2-dicarboxylate (**3j**)

Prepared according to **General Procedure A** using **1** (28.1 mg, 0.201 mmol), **2j** (92.3 mg, 0.406 mmol), AgOAc (3.8 mg, 22.8  $\mu$ mol), NEt<sub>3</sub> (5.6  $\mu$ L, 4.1 mg, 40.0  $\mu$ mol), (*S*)-DTBM-SegPhos (25.4 mg, 21.5  $\mu$ mol) in THF (3.1 mL) at 0 °C for 10 h; flash chromatography on silica gel (pre-neutralized with 1% NEt<sub>3</sub> in PE, PE:EA = 6:1) provided **3j** (73.3 mg, 0.200 mmol, 99% yield).

Ee: 89% (Chiralcel<sup>®</sup> AD-H; 10% *i*-PrOH in hexanes; flow rate = 1.0 mL/min, detection at 254 nm; t<sub>1</sub> = 17.5 min (minor); t<sub>2</sub> = 22.9 min (major)).

[ $\alpha$ ]<sub>D</sub><sup>27</sup> 25.5 (c 1.3, CHCl<sub>3</sub>).

<sup>1</sup>H NMR (400 MHz, CDCl<sub>3</sub>)  $\delta$  (ppm): 8.15 – 7.98 (m, 1H), 7.94 – 7.84 (m, 1H), 7.84 – 7.75 (m, 2H), 7.52 – 7.42 (m, 3H), 5.03 (d, *J* = 3.1 Hz, 1H), 4.84 (d, *J* = 3.6 Hz, 1H), 3.89 (s, 3H), 3.80 (s, 3H), 3.73 (d, *J* = 18.5 Hz, 1H), 3.11 (d, *J* = 18.5 Hz, 1H), 2.62 (brs,

1H), 1.19 (s, 3H).

<sup>13</sup>C NMR (101 MHz, CDCl<sub>3</sub>) δ (ppm): 207.23, 171.27, 170.47, 133.78, 131.69, 131.62, 129.15, 128.70, 125.97, 125.91, 125.27, 125.23, 122.55, 80.06, 64.70, 64.62, 52.64, 52.40, 50.93, 49.33, 13.86.

IR (neat, cm<sup>-1</sup>): 3350, 3338, 1783, 1745, 1727, 1439, 1318, 1259, 1207, 1102.

HRMS-EI (*m/z*): [M]<sup>+</sup> calcd. for C<sub>21</sub>H<sub>21</sub>NO<sub>5</sub>, 367.1414; found, 367.1418.

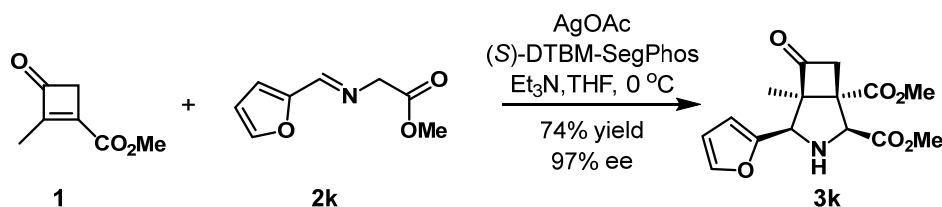

### Dimethyl (1*S*,2*S*,4*R*,5*S*)-4-(furan-2-yl)-5-methyl-6-oxo-3-azabicyclo[3.2.0]heptane-1,2-dicarboxylate (**3k**)

Prepared according to **General Procedure A** using **1** (28.0 mg, 0.200 mmol), **2k** (67.7 mg, 0.405 mmol), AgOAc (3.8 mg, 22.8 μmol), NEt<sub>3</sub> (5.6 μL, 4.1 mg, 40.0 μmol), (S)-DTBM-SegPhos (28.1 mg, 23.8 μmol) in THF 3.1 (3.1 mL) at 0 °C for 9 h; flash chromatography on silica gel (pre-neutralized with 1% NEt<sub>3</sub> in PE, PE:EA = 6:1) provided **3k** (45.5 mg, 0.148 mmol, 74% yield).

Ee: 97% (Chiralcel<sup>®</sup>IC; 10% *i*-PrOH in hexanes; flow rate = 1.0 mL/min, detection at 210 nm; t<sub>1</sub> = 30.8 min (major); t<sub>2</sub> = 58.1 min (minor)).

[α]<sub>D</sub><sup>25</sup> -19.0 (c 1.0, CHCl<sub>3</sub>).

<sup>1</sup>H NMR (400 MHz, CDCl<sub>3</sub>) δ (ppm): 7.37 (t, *J* = 1.4 Hz, 1H), 6.34 (d, *J* = 1.4 Hz, 2H), 4.71 (d, *J* = 4.4 Hz, 1H), 4.13 (d, *J* = 4.3 Hz, 1H), 3.85 (s, 3H), 3.77 (s, 3H), 3.66 (d, *J* = 18.5 Hz, 1H), 2.99 (d, *J* = 18.6 Hz, 1H), 2.88 (brs, 1H), 1.21 (s, 3H).

<sup>13</sup>C NMR (101 MHz, CDCl<sub>3</sub>) δ (ppm): 206.02, 170.94, 170.13, 149.57, 142.57, 110.35, 107.72, 79.40, 64.92, 52.67, 52.50, 51.79, 48.78, 13.66.

IR (neat, cm<sup>-1</sup>): 2953, 1785, 1729, 1260, 1096, 1020.

HRMS-EI (*m/z*): [M]<sup>+</sup> calcd. for C<sub>15</sub>H<sub>17</sub>NO<sub>6</sub>, 307.1050; found, 307.1051.

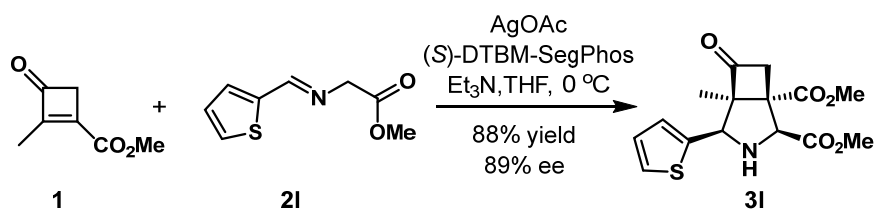

### Dimethyl (1*S*,2*S*,4*R*,5*S*)-5-methyl-6-oxo-4-(thiophen-2-yl)-3-azabicyclo[3.2.0]heptane-1,2-dicarboxylate (**3l**)

Prepared according to **General Procedure A** using **1** (28.1 mg, 0.201 mmol), **2l** (75.0 mg, 0.410 mmol), AgOAc (4.0 mg, 24.0 μmol), NEt<sub>3</sub> (5.6 μL, 4.1 mg, 40.0 μmol), (S)-DTBM-SegPhos (27.6 mg, 23.4 μmol) in THF (3.1 mL) at 0 °C for 10 h; flash

chromatography on silica gel (pre-neutralized with 1% NEt<sub>3</sub> in PE, PE:EA = 6:1) provided **3I** (57.3 mg, 0.177 mmol, 88% yield).

Ee: 89% (Chiralcel<sup>®</sup>IC; 10% *i*-PrOH in hexanes; flow rate = 1.0 mL/min, detection at 210 nm; t<sub>1</sub> = 52.6 min (major); t<sub>2</sub> = 57.4 min (minor)).

[α]<sub>D</sub><sup>27</sup> -10.5 (c 1.2, CHCl<sub>3</sub>).

<sup>1</sup>H NMR (400 MHz, CDCl<sub>3</sub>) δ (ppm): 7.24 (dd, *J* = 5.0, 1.3 Hz, 1H), 7.04 – 6.92 (m, 2H), 4.70 (d, *J* = 3.7 Hz, 1H), 4.32 (d, *J* = 3.2 Hz, 1H), 3.84 (s, 3H), 3.76 (s, 3H), 3.66 (d, *J* = 18.5 Hz, 1H), 3.02 (d, *J* = 18.6 Hz, 1H), 2.83 (brs, 1H), 1.19 (s, 3H).

<sup>13</sup>C NMR (101 MHz, CDCl<sub>3</sub>) δ (ppm): 206.45, 171.03, 170.01, 139.54, 126.77, 125.05, 124.88, 78.99, 66.60, 64.47, 52.60, 52.39, 50.88, 49.46, 13.37.

IR (neat, cm<sup>-1</sup>): 3340, 1784, 1731, 1442, 1352, 1263, 1230, 1108.

HRMS-EI (*m/z*): [M]<sup>+</sup> calcd. for C<sub>15</sub>H<sub>17</sub>NO<sub>5</sub>S, 323.0822; found, 323.0822.

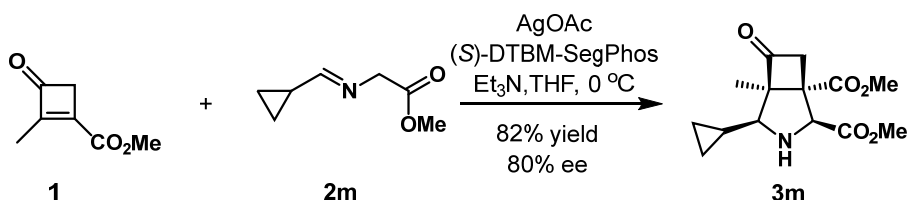

#### Dimethyl (1*S*,2*S*,4*S*,5*S*)-4-cyclopropyl-5-methyl-6-oxo-3-azabicyclo[3.2.0]heptane-1,2-dicarboxylate (**3m**)

Prepared according to **General Procedure A** using **1** (28.1 mg, 0.201 mmol), **2m** (56.8 mg, 0.402 mmol), AgOAc (3.5 mg, 20.9 μmol), NEt<sub>3</sub> (5.6 μL, 4.1 mg, 40.0 μmol), (S)-DTBM-SegPhos (27.0 mg, 22.9 μmol) in THF (3.1 mL) at 0 °C for 10 h; flash chromatography on silica gel (pre-neutralized with 1% NEt<sub>3</sub> in PE, PE:EA = 6:1) provided **3m** (46.3 mg, 0.165 mmol, 82% yield).

Ee: 80% (Chiralcel<sup>®</sup>IC; 10% *i*-PrOH in hexanes; flow rate = 1.0 mL/min, detection at 210 nm; t<sub>1</sub> = 29.2 min (major); t<sub>2</sub> = 34.2 min (minor)).

[α]<sub>D</sub><sup>22</sup> -37.8 (c 1.1, CHCl<sub>3</sub>).

<sup>1</sup>H NMR (400 MHz, CDCl<sub>3</sub>) δ (ppm): 4.52 (s, 1H), 3.80 (s, 3H), 3.71 (s, 3H), 3.65 (d, *J* = 18.7 Hz, 1H), 2.82 (d, *J* = 18.7 Hz, 1H), 2.57 – 2.27 (brs, 1H), 2.18 (d, *J* = 9.2 Hz, 1H), 1.15 (s, 3H), 0.93 – 0.81 (m, 1H), 0.65 – 0.56 (m, 1H), 0.56 – 0.46 (m, 1H), 0.24 (dq, *J* = 9.8, 4.9 Hz, 1H), 0.12 (dq, *J* = 9.8, 4.9 Hz, 1H).

<sup>13</sup>C NMR (101 MHz, CDCl<sub>3</sub>) δ (ppm): 208.82, 171.27, 170.55, 79.10, 72.48, 64.53, 52.50, 52.32, 52.07, 48.57, 13.41, 10.03, 2.65, 2.17.

IR (neat, cm<sup>-1</sup>): 3354, 3005, 2940, 1781, 1729, 1437, 1321, 1251, 1221.

HRMS-EI (*m/z*): [M]<sup>+</sup> calcd. for C<sub>14</sub>H<sub>19</sub>NO<sub>5</sub>, 281.1258; found, 281.1255.

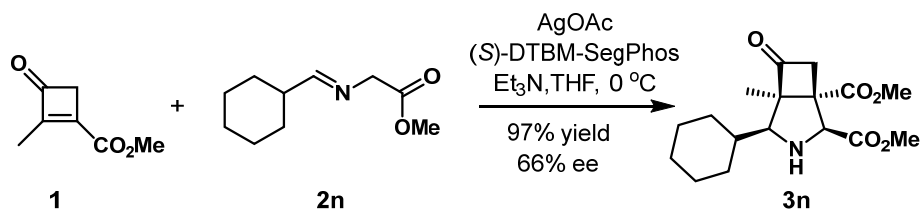

### Dimethyl (1*S*,2*S*,4*S*,5*S*)-4-cyclohexyl-5-methyl-6-oxo-3-azabicyclo[3.2.0]heptane-1,2-dicarboxylate (**3n**)

Prepared according to **General Procedure A** using **1** (28.0 mg, 0.200 mmol), **2n** (73.5 mg, 0.401 mmol), AgOAc (3.3 mg, 20.0  $\mu$ mol), NEt<sub>3</sub> (5.6  $\mu$ L, 4.1 mg, 40.0  $\mu$ mol), (*S*)-DTBM-SegPhos (25.9 mg, 22.0  $\mu$ mol) in THF (3.1 mL) at 0 °C for 10 h; flash chromatography on silica gel (pre-neutralized with 1% NEt<sub>3</sub> in PE, PE:EA = 6:1) provided **3n** (62.5 mg, 0.193 mmol, 97% yield).

Ee: 66% (Chiralcel<sup>®</sup>IC; 10% *i*-PrOH in hexanes; flow rate = 1.0 mL/min, detection at 210 nm;  $t_1$  = 15.0 min (major);  $t_2$  = 18.3 min (minor)).

$[\alpha]_D^{26}$  -59.2 (c 1.2, CHCl<sub>3</sub>).

<sup>1</sup>H NMR (400 MHz, CDCl<sub>3</sub>)  $\delta$  (ppm): 4.52 (s, 1H), 3.78 (s, 3H), 3.69 (s, 3H), 3.49 (d,  $J$  = 18.3 Hz, 1H), 2.80 (d,  $J$  = 18.4 Hz, 1H), 2.72 (d,  $J$  = 8.7 Hz, 1H), 2.44 (s, 1H), 2.06 – 1.91 (m, 1H), 1.86 (d,  $J$  = 12.7 Hz, 1H), 1.76 – 1.52 (m, 3H), 1.41 – 1.30 (m, 1H), 1.27 – 1.06 (m, 6H), 1.02 – 0.91 (m, 2H).

<sup>13</sup>C NMR (101 MHz, CDCl<sub>3</sub>)  $\delta$  (ppm): 207.48, 171.20, 170.69, 79.93, 72.91, 64.26, 53.17, 52.45, 52.36, 47.95, 40.91, 31.38, 30.27, 26.00, 25.75, 25.69, 16.11.

IR (neat, cm<sup>-1</sup>): 2971, 2931, 2902, 1743, 1735, 1724, 1434, 1257, 1095, 1052.

HRMS-EI ( $m/z$ ): [M]<sup>+</sup> calcd. for C<sub>17</sub>H<sub>25</sub>NO<sub>5</sub>, 323.1727; found, 323.1725.

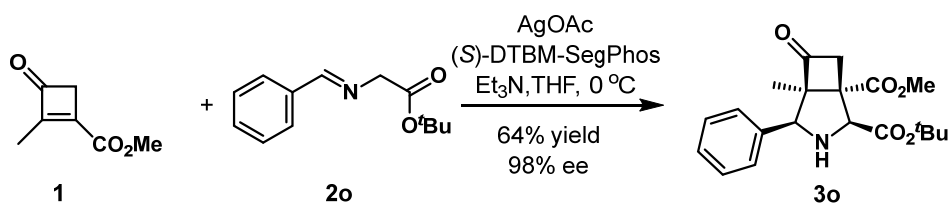

### 2-(*Tert*-butyl) 1-methyl (1*S*,2*S*,4*S*,5*S*)-5-methyl-6-oxo-4-phenyl-3-azabicyclo[3.2.0]heptane-1,2-dicarboxylate (**3o**)

Prepared according to **General Procedure A** using **1** (27.5 mg, 0.196 mmol), **2o** (87.1 mg, 0.397 mmol), AgOAc (3.5 mg, 20.9  $\mu$ mol), NEt<sub>3</sub> (5.6  $\mu$ L, 4.1 mg, 40.0  $\mu$ mol), (*S*)-DTBM-SegPhos (25.6 mg, 23.0  $\mu$ mol) in THF (3.1 mL) at 0 °C for 10 h; flash chromatography on silica gel (pre-neutralized with 1% NEt<sub>3</sub> in PE, PE:EA = 6:1) provided **3o** (45.5 mg, 0.127 mmol, 64% yield).

Ee: 98% (Chiralcel<sup>®</sup>IC; 5% *i*-PrOH in hexanes; flow rate = 1.0 mL/min, detection at 210 nm;  $t_1$  = 22.8 min (major);  $t_2$  = 26.4 min (minor)).

$[\alpha]_D^{34}$  1.9 (c 1.1, CHCl<sub>3</sub>).

<sup>1</sup>H NMR (400 MHz, CDCl<sub>3</sub>)  $\delta$  (ppm): 7.35 – 7.27 (m, 5H), 4.60 (s, 1H), 4.01 (s, 1H), 3.83 (s, 3H), 3.66 (d,  $J$  = 18.4 Hz, 1H), 3.02

(d,  $J = 18.4$  Hz, 1H), 2.55 (brs, 1H), 1.46 (s, 9H), 1.13 (s, 3H).

$^{13}\text{C}$  NMR (101 MHz,  $\text{CDCl}_3$ )  $\delta$  (ppm): 207.33, 171.43, 169.17, 136.19, 128.37, 128.16, 127.45, 82.06, 79.01, 71.01, 65.41, 52.38, 51.08, 48.90, 27.91, 13.23.

IR (neat  $\text{cm}^{-1}$ ): 3342, 2879, 1778, 1747, 1730, 1626, 1376, 1323, 1224, 1200, 1170.

HRMS-ESI ( $m/z$ ):  $[\text{M}+\text{H}]^+$  calcd. for  $\text{C}_{20}\text{H}_{26}\text{NO}_5$ , 360.1805; found, 360.1801.

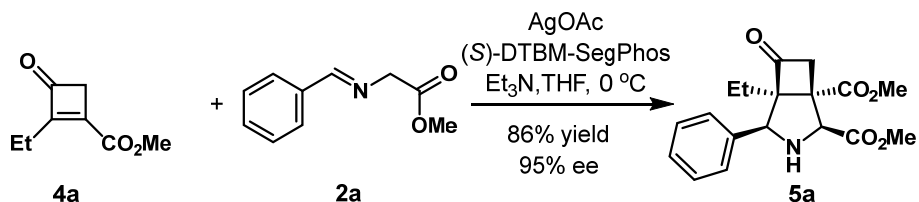

#### Dimethyl (1*S*,2*S*,4*S*,5*S*)-5-ethyl-6-oxo-4-phenyl-3-azabicyclo[3.2.0]heptane-1,2-dicarboxylate (**5a**)

Prepared according to **General Procedure A** using **4a** (30.4 mg, 0.197 mmol), **2a** (71.3 mg, 0.402 mmol), AgOAc (4.0 mg, 24.0  $\mu\text{mol}$ ),  $\text{NEt}_3$  (5.6  $\mu\text{L}$ , 4.1 mg, 40.0  $\mu\text{mol}$ ), (S)-DTBM-SegPhos (26.5 mg, 22.5  $\mu\text{mol}$ ) in THF (3.1 mL) at  $0\text{ }^\circ\text{C}$  for 10 h; flash chromatography on silica gel (pre-neutralized with 1%  $\text{NEt}_3$  in PE, PE:EA = 6:1) provided **5a** (55.9 mg, 0.169 mmol, 86% yield).

Ee: 95% (Chiralcel<sup>®</sup>IA; 10% *i*-PrOH in hexanes; flow rate = 1.0 mL/min, detection at 210 nm;  $t_1 = 11.5$  min (minor);  $t_2 = 12.5$  min (major)).

$[\alpha]_{\text{D}}^{28}$  4.8 (c 1.2,  $\text{CHCl}_3$ ).

$^1\text{H}$  NMR (400 MHz,  $\text{CDCl}_3$ )  $\delta$  (ppm): 7.35 – 7.27 (m, 5H), 4.63 (d,  $J = 2.0$  Hz, 1H), 4.19 – 4.04 (m, 1H), 3.85 (s, 3H), 3.76 (s, 3H), 3.61 (d,  $J = 18.6$  Hz, 1H), 2.98 (d,  $J = 18.6$  Hz, 1H), 2.58 (t,  $J = 4.5$  Hz, 1H), 1.80 – 1.58 (m, 2H), 0.79 (t,  $J = 7.5$  Hz, 3H).

$^{13}\text{C}$  NMR (101 MHz,  $\text{CDCl}_3$ )  $\delta$  (ppm): 207.52, 171.80, 170.33, 136.17, 128.38, 128.06, 127.87, 83.99, 68.99, 65.30, 52.62, 52.30, 49.80, 49.61, 21.23, 8.56.

IR (neat,  $\text{cm}^{-1}$ ): 3329, 1784, 1722, 1438, 1372, 1255, 1229, 1106.

HRMS-EI ( $m/z$ ):  $[\text{M}]^+$  calcd. for  $\text{C}_{18}\text{H}_{21}\text{NO}_5$ , 331.1414; found, 331.1412.

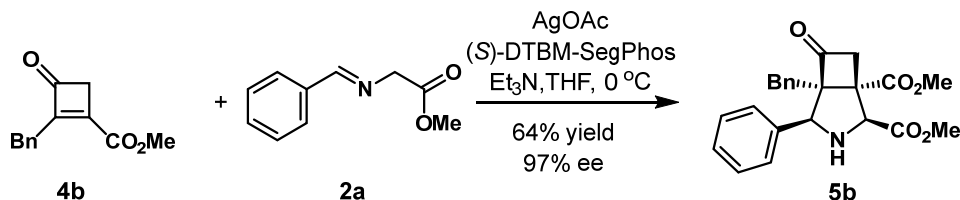

#### Dimethyl (1*S*,2*S*,4*S*,5*S*)-5-benzyl-6-oxo-4-phenyl-3-azabicyclo[3.2.0]heptane-1,2-dicarboxylate (**5b**)

Prepared according to **General Procedure A** using **5b** (43.9 mg, 0.203 mmol), **2a** (70.5 mg, 0.398 mmol), AgOAc (3.1 mg, 18.6  $\mu\text{mol}$ ),  $\text{NEt}_3$  (5.6  $\mu\text{L}$ , 4.1 mg, 40.0  $\mu\text{mol}$ ), (S)-DTBM-SegPhos (25.4 mg, 21.5  $\mu\text{mol}$ ) in THF (3.1 mL) at  $0\text{ }^\circ\text{C}$  for 9 h; flash

chromatography on silica gel (pre-neutralized with 1% NEt<sub>3</sub> in PE, PE:EA = 6:1) provided **5b** (51.5 mg, 0.131 mmol, 64% yield).

Ee: 97% (Chiralcel<sup>®</sup>IC; 10% *i*-PrOH in hexanes; flow rate = 1.0 mL/min, detection at 210 nm; t<sub>1</sub> = 31.7 min (minor); t<sub>2</sub> = 34.3 min (major)).

[α]<sub>D</sub><sup>21</sup> -17.9 (c 1.0, CHCl<sub>3</sub>).

<sup>1</sup>H NMR (400 MHz, CDCl<sub>3</sub>) δ (ppm): 7.37 – 7.24 (m, 3H), 7.24 – 7.11 (m, 5H), 7.10 – 7.01 (m, 2H), 4.67 (d, *J* = 3.5 Hz, 1H), 4.22 (d, *J* = 3.3 Hz, 1H), 3.74 (s, 3H), 3.62 (s, 3H), 3.39 (d, *J* = 18.6 Hz, 1H), 3.12 (d, *J* = 14.7 Hz, 1H), 3.02 – 2.91 (m, 2H), 2.59 (brs, 1H).

<sup>13</sup>C NMR (101 MHz, CDCl<sub>3</sub>) δ (ppm): 207.36, 171.58, 170.24, 136.01, 135.31, 130.37, 128.39, 128.21, 128.04, 128.02, 126.77, 83.60, 70.28, 65.80, 52.46, 52.31, 50.38, 50.00, 35.23.

IR (neat cm<sup>-1</sup>): 3358, 3049, 1782, 1725, 1436, 1257, 1214, 1030.

HRMS-EI (*m/z*): [M]<sup>+</sup> calcd. for C<sub>23</sub>H<sub>23</sub>NO<sub>5</sub>, 393.1571; found, 393.1573.

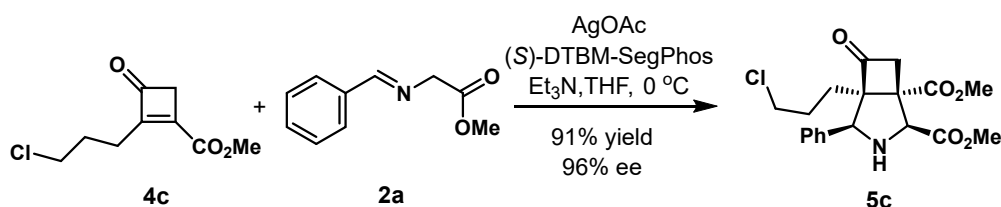

#### Dimethyl (1*S*,2*S*,4*S*,5*S*)-5-(3-chloropropyl)-6-oxo-4-phenyl-3-azabicyclo[3.2.0]heptane-1,2-dicarboxylate (**5c**)

Prepared according to **General Procedure A** using **4c** (40.2 mg, 0.198 mmol), **2a** (69.6 mg, 0.404 mmol), AgOAc (4.1 mg, 24.6 μmol), NEt<sub>3</sub> (5.6 μL, 4.1 mg, 40.0 μmol), (S)-DTBM-SegPhos (27.6 mg, 23.4 μmol) in THF (3.1 mL) at 0 °C for 11 h; flash chromatography on silica gel (pre-neutralized with 1% NEt<sub>3</sub> in PE, PE:EA = 6:1) provided **5c** (68.5 mg, 0.180 mmol, 91% yield).

Ee: 96% (Chiralcel<sup>®</sup>IA; 10% *i*-PrOH in hexanes; flow rate = 1.0 mL/min, detection at 210 nm; t<sub>1</sub> = 13.9 min (minor); t<sub>2</sub> = 15.4 min (major)).

[α]<sub>D</sub><sup>24</sup> -21.8 (c 1.1, CHCl<sub>3</sub>).

<sup>1</sup>H NMR (400 MHz, CDCl<sub>3</sub>) δ (ppm): 7.35 – 7.27 (m, 5H), 4.65 (d, *J* = 4.4 Hz, 1H), 4.11 (d, *J* = 4.1 Hz, 1H), 3.87 (s, 3H), 3.76 (s, 3H), 3.64 (d, *J* = 18.7 Hz, 1H), 3.43 (dt, *J* = 11.1, 5.7 Hz, 1H), 3.34 (dt, *J* = 10.9, 6.3 Hz, 1H), 3.00 (d, *J* = 18.7 Hz, 1H), 2.61 (t, *J* = 4.5 Hz, 1H), 1.93 – 1.80 (m, 1H), 1.79 – 1.68 (m, 1H), 1.63 (td, *J* = 9.1, 4.3 Hz, 2H).

<sup>13</sup>C NMR (101 MHz, CDCl<sub>3</sub>) δ (ppm): 206.90, 171.49, 170.16, 135.88, 128.58, 128.17, 128.01, 82.37, 69.80, 65.21, 52.86, 52.35, 50.12, 49.59, 44.84, 27.11, 26.24.

IR (neat cm<sup>-1</sup>): 3340, 2878, 1779, 1741, 1719, 1626, 1437, 1323, 1212.

HRMS-EI (*m/z*): [M]<sup>+</sup> calcd. for C<sub>19</sub>H<sub>22</sub>ClNO<sub>5</sub>, 379.1181; found, 379.1185.

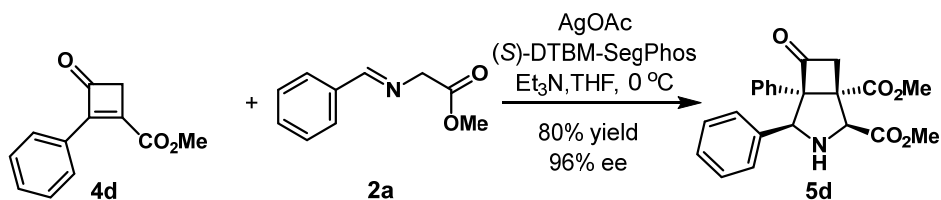

#### Dimethyl (1*S*,2*S*,4*S*,5*S*)-6-oxo-4,5-diphenyl-3-azabicyclo[3.2.0]heptane-1,2-dicarboxylate (**5d**)

Prepared according to **General Procedure A** using **1c** (40.6 mg, 0.201 mmol), **2a** (70.9 mg, 0.400 mmol), AgOAc (4.3 mg, 25.8  $\mu$ mol), NEt<sub>3</sub> (5.6  $\mu$ L, 4.1 mg, 40.0  $\mu$ mol), (*S*)-DTBM-SegPhos (26.6 mg, 22.6  $\mu$ mol) in THF (3.1 mL) at 0 °C for 10 h; flash chromatography on silica gel (pre-neutralized with 1% NEt<sub>3</sub> in PE, PE:EA = 6:1) provided **5d** (60.7 mg, 0.160 mmol, 80% yield). Ee: 96% (Chiralcel<sup>®</sup>IC; 10% *i*-PrOH in hexanes; flow rate = 1.0 mL/min, detection at 210 nm; t<sub>1</sub> = 19.4 min (minor); t<sub>2</sub> = 36.3 min (major)).

[ $\alpha$ ]<sub>D</sub><sup>27</sup> 3.3 (c 1.1, CHCl<sub>3</sub>).

<sup>1</sup>H NMR (400 MHz, CDCl<sub>3</sub>)  $\delta$  (ppm): 7.27 – 7.04 (m, 8H), 6.97 – 6.83 (m, 2H), 4.99 (s, 1H), 4.54 (s, 1H), 3.71 (s, 3H), 3.69 (d, *J* = 18.7 Hz, 1H), 3.34 (s, 3H), 3.03 (d, *J* = 18.7 Hz, 1H)..

<sup>13</sup>C NMR (101 MHz, CDCl<sub>3</sub>)  $\delta$  (ppm): 204.47, 170.69, 170.08, 135.11, 134.29, 128.41, 128.23, 127.87, 127.84, 126.95, 126.50, 86.17, 72.96, 64.39, 53.76, 52.43, 52.21, 50.10.

IR (neat cm<sup>-1</sup>): 1787, 1725, 1438, 1253, 1226.

HRMS-EI (*m/z*): [M]<sup>+</sup> calcd. for C<sub>22</sub>H<sub>21</sub>NO<sub>5</sub>, 379.1414; found, 379.1416.

#### Synthesis of **5d** on a 1.4 mmol scale:

Prepared according to **General Procedure A** using **4d** (0.282 g, 2.01 mmol), **6a** (0.283 g, 1.40 mmol), AgOAc (12.5 mg, 74.9  $\mu$ mol), (*S*)-DTBM-SegPhos (92.2 mg, 78.2  $\mu$ mol) in THF (15 mL) and NEt<sub>3</sub> (40  $\mu$ L, 29.1 mg, 0.288 mmol) at 0 °C for 11 h; flash chromatography on silica gel (pre-neutralized with 1% NEt<sub>3</sub> in PE, PE:EA = 6:1) provided **3d** (0.469 g, 1.24 mmol, 89% yield). Ee: 95% (Chiralcel<sup>®</sup>IC; 10% *i*-PrOH in hexanes; flow rate = 1.0 mL/min, detection at 210 nm; t<sub>1</sub> = 22.1 min (minor); t<sub>2</sub> = 44.1 min (major)).

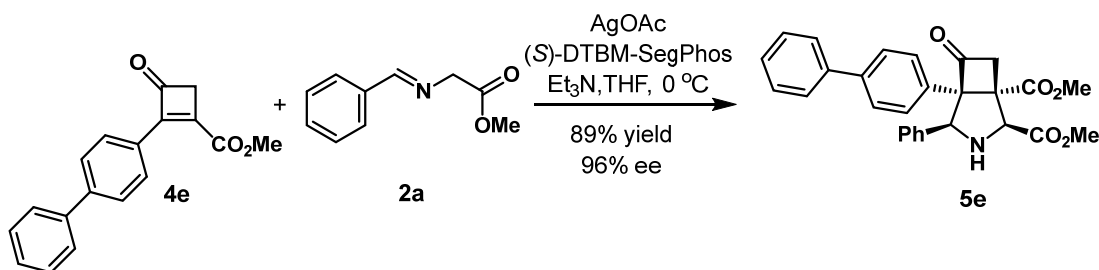

#### Dimethyl (1*S*,2*S*,4*S*,5*S*)-5-([1,1'-biphenyl]-4-yl)-6-oxo-4-phenyl-3-azabicyclo[3.2.0]heptane-1,2-dicarboxylate (**5e**)



Prepared according to **General Procedure A** using **4e** (55.5 mg, 0.199 mmol), **2a** (69.6 mg, 0.393 mmol), AgOAc (3.6 mg, 21.6  $\mu\text{mol}$ ),  $\text{NEt}_3$  (5.6  $\mu\text{L}$ , 4.1 mg, 40.0  $\mu\text{mol}$ ), (*S*)-DTBM-SegPhos (27.2 mg, 23.1  $\mu\text{mol}$ ) in THF (3.1 mL) at 0 °C for 10 h; flash chromatography on silica gel (pre-neutralized with 1%  $\text{NEt}_3$  in PE, PE:EA = 6:1) provided **5e** (81 mg, 0.178 mmol, 89% yield).

Ee: 96% (Chiralcel<sup>®</sup>IC; 10% *i*-PrOH in hexanes; flow rate = 1.0 mL/min, detection at 254 nm;  $t_1$  = 25.4 min (minor);  $t_2$  = 49.7 min (major)).

$[\alpha]_{\text{D}}^{23}$  -61.7 (c 1.0,  $\text{CHCl}_3$ ).

$^1\text{H}$  NMR (400 MHz,  $\text{CDCl}_3$ )  $\delta$  (ppm): 7.63 – 7.48 (m, 4H), 7.48 – 7.38 (m, 2H), 7.38 – 7.28 (m, 3H), 7.27 – 7.09 (m, 3H), 7.05 – 6.92 (m, 2H), 5.06 (s, 1H), 4.61 (s, 1H), 3.80 (s, 3H), 3.78 (d,  $J$  = 18.7 Hz, 1H), 3.44 (s, 3H), 3.09 (d,  $J$  = 18.7 Hz, 1H), 2.77 (brs, 1H).

$^{13}\text{C}$  NMR (101 MHz,  $\text{CDCl}_3$ )  $\delta$  (ppm): 204.62, 170.81, 170.28, 140.41, 140.11, 135.37, 133.32, 128.80, 128.25, 127.89, 127.52, 126.98, 126.91, 126.88, 86.08, 72.97, 64.46, 53.85, 52.45, 52.31, 50.09.

IR (neat  $\text{cm}^{-1}$ ): 3350, 2959, 2870, 1736, 1627, 1497, 1437, 1375, 1333, 1200, 1171, 1051.

HRMS-EI ( $m/z$ ):  $[\text{M}]^+$  calcd. for  $\text{C}_{28}\text{H}_{25}\text{NO}_5$ , 455.1724; found, 455.1727.

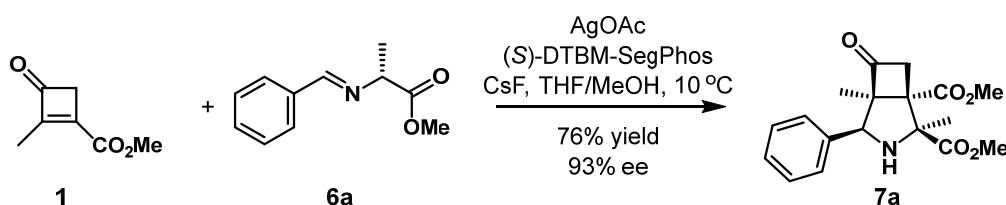

#### Dimethyl (1*S*,2*S*,4*S*,5*S*)-2,5-dimethyl-6-oxo-4-phenyl-3-azabicyclo[3.2.0]heptane-1,2-dicarboxylate (**7a**)

**General Procedure B:** A suspension of AgOAc (3.3 mg, 20.0  $\mu\text{mol}$ ) and (*S*)-DTBM-SegPhos (27.7 mg, 23.4  $\mu\text{mol}$ ) in THF (1 mL) was stirred at room temperature for 10 min. The resulting mixture was cooled to 10 °C and a solution of **6a** (76.5 mg, 0.400 mmol) in THF (1 mL), a solution of CsF (12.4 mg, 81.6  $\mu\text{mol}$ ) in MeOH (0.3 mL), and a solution of **1** (28.3 mg, 0.202 mmol) in THF (1 mL) were sequentially added dropwise. The reaction mixture was stirred at 10 °C for 21 h before quenched with  $\text{H}_2\text{O}$  and diluted with DCM. The organic layer was separated, and the aqueous phase was extracted with DCM three times. The combined organic phase was washed with brine, dried over  $\text{Na}_2\text{SO}_4$ , concentrated and the residue was purified by column chromatography on silica gel (pre-neutralized with 1%  $\text{NEt}_3$  in PE, PE:EA = 8:1) to afford the **7a** (50.8 mg, 0.153 mmol, 76% yield).

Ee: 93% (Chiralcel<sup>®</sup>OD-H; 10% *i*-PrOH in hexanes; flow rate = 1.0 mL/min, detection at 210 nm;  $t_1$  = 11.9 min (minor);  $t_2$  = 25.3 min (major)).

$[\alpha]_{\text{D}}^{27}$  -20.4 (c 1.0,  $\text{CHCl}_3$ ).

$^1\text{H}$  NMR (400 MHz,  $\text{CDCl}_3$ )  $\delta$  (ppm): 7.38 – 7.28 (m, 5H), 4.29 (s, 1H), 3.79 (s, 3H), 3.78 (s, 3H), 3.54 (d,  $J$  = 18.1 Hz, 1H), 3.23 (d,  $J$  = 18.1 Hz, 1H), 2.37 (brs, 1H), 1.76 (s, 3H), 1.23 (s, 3H).

$^{13}\text{C}$  NMR (101 MHz,  $\text{CDCl}_3$ )  $\delta$  (ppm): 206.83, 173.22, 170.53, 136.57, 128.43, 128.26, 127.18, 78.47, 69.93, 68.31, 53.56, 53.22, 52.45, 52.13, 22.99, 15.32.

IR (neat  $\text{cm}^{-1}$ ): 2959, 1792, 1743, 1717, 1494, 1451, 1288, 1200, 1153.

HRMS-EI ( $m/z$ ):  $[\text{M}]^+$  calcd. for  $\text{C}_{18}\text{H}_{21}\text{NO}_5$ , 331.1414; found, 331.1422.

### Synthesis of **7a** on a 2 mmol scale:

Prepared according to **General Procedure B** using **1** (0.282 g, 2.01 mmol), **6a** (0.764 g, 4.00 mmol), AgOAc (16.7 mg, 0.100 mmol), CsF (0.120 mg, 0.790 mmol), (*S*)-DTBM-SegPhos (138.8 mg, 0.118 mmol) in THF (15 mL) and MeOH (1.5 mL) at 10 °C for 33 h; flash chromatography on silica gel (pre-neutralized with 1%  $\text{NEt}_3$  in PE, PE:EA = 10:1) provided **7a** (0.519 g, 1.57 mmol, 78% yield).

Ee: 93% (Chiralcel<sup>®</sup>OD-H; 10% *i*-PrOH in hexanes; flow rate = 1.0 mL/min, detection at 210 nm;  $t_1$  = 10.6 min (minor);  $t_2$  = 21.2 min (major)).

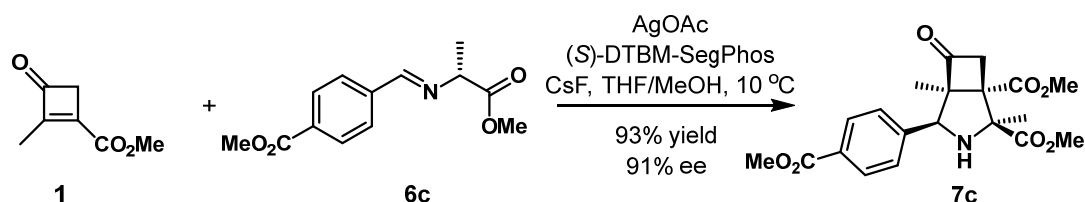

### Dimethyl (1*S*,2*S*,4*S*,5*S*)-4-(4-(methoxycarbonyl)phenyl)-2,5-dimethyl-6-oxo-3-azabicyclo[3.2.0]heptane-1,2-dicarboxylate (**7c**)

Prepared according to **General Procedure B** using **1** (28.3 mg, 0.202 mmol), **6c** (99.7 mg, 0.400 mmol), AgOAc (3.4 mg, 20.4  $\mu\text{mol}$ ), CsF (11.6 mg, 76.4  $\mu\text{mol}$ ), (*S*)-DTBM-SegPhos (26.6 mg, 22.6  $\mu\text{mol}$ ) in THF (3.0 mL) and MeOH (0.3 mL) at 10 °C for 21 h; flash chromatography on silica gel (pre-neutralized with 1%  $\text{NEt}_3$  in PE, PE:EA = 8:1) provided **7c** (73.3 mg, 0.188 mmol, 93% yield).

Ee: 91% (Chiralcel<sup>®</sup>IA; 20% *i*-PrOH in hexanes; flow rate = 1.0 mL/min, detection at 210 nm;  $t_1$  = 10.3 min (minor);  $t_2$  = 15.0 min (major)).

$[\alpha]_D^{31}$  9.1 (c 1.0,  $\text{CHCl}_3$ ).

$^1\text{H}$  NMR (400 MHz,  $\text{CDCl}_3$ )  $\delta$  (ppm): 8.01 - 7.88 (m, 2H), 7.43 - 7.29 (m, 2H), 4.33 (d,  $J$  = 3.8 Hz, 1H), 3.87 (s, 3H), 3.78 (s, 3H), 3.77 (s, 3H), 3.55 (d,  $J$  = 18.3 Hz, 1H), 3.19 (d,  $J$  = 18.3 Hz, 1H), 2.33 (d,  $J$  = 4.4 Hz, 1H), 1.74 (s, 3H), 1.22 (s, 3H).

$^{13}\text{C}$  NMR (101 MHz,  $\text{CDCl}_3$ )  $\delta$  (ppm): 206.47, 173.11, 170.35, 166.70, 141.95, 130.16, 129.55, 127.17, 78.18, 70.04, 67.79, 53.48, 53.35, 52.49, 52.19, 52.01, 23.08, 15.22.

IR (neat  $\text{cm}^{-1}$ ): 3338, 2815, 1790, 1743, 1723, 1706, 1435, 1270, 1194, 1147, 1134, 1107.

HRMS-ESI ( $m/z$ ):  $[\text{M}+\text{H}]^+$  calcd. for  $\text{C}_{20}\text{H}_{24}\text{NO}_7$ , 390.1547; found, 390.1547.

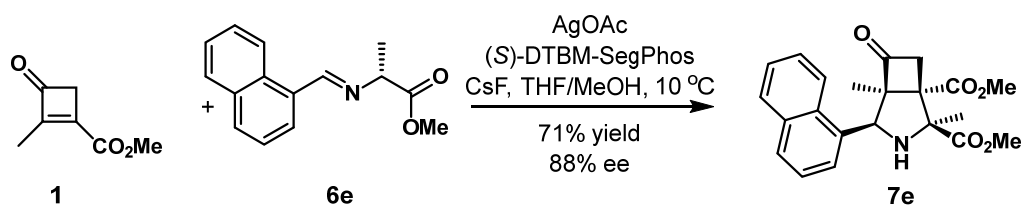

**Dimethyl (1*S*,2*S*,4*S*,5*S*)-2,5-dimethyl-4-(naphthalen-1-yl)-6-oxo-3-azabicyclo[3.2.0]heptane-1,2-dicarboxylate (**7e**)**

Prepared according to **General Procedure B** using **1** (28.7 mg, 0.205 mmol), **6e** (97.8 mg, 0.405 mmol), AgOAc (3.9 mg, 23.4  $\mu$ mol), CsF (12.6 mg, 82.9  $\mu$ mol), (*S*)-DTBM-SegPhos (27.1 mg, 23.0  $\mu$ mol) in THF (3.1 mL) and MeOH (0.3 mL) at 10 °C for 21 h; flash chromatography on silica gel (pre-neutralized with 1% NEt<sub>3</sub> in PE, PE:EA = 8:1) provided **7e** (55.4 mg, 0.145 mmol, 71% yield).

Ee: 88% (Chiralcel<sup>®</sup>IA; 10% *i*-PrOH in hexanes; flow rate = 1.0 mL/min, detection at 254 nm; t<sub>1</sub> = 10.5 min (minor); t<sub>2</sub> = 12.6 min (major)).

[ $\alpha$ ]<sub>D</sub><sup>25</sup> 23.1 (c 1.2, CHCl<sub>3</sub>).

<sup>1</sup>H NMR (400 MHz, CDCl<sub>3</sub>)  $\delta$  (ppm): 8.18 – 8.06 (m, 1H), 7.92 – 7.83 (m, 1H), 7.83 – 7.72 (m, 2H), 7.54 – 7.37 (m, 3H), 5.35 (d, *J* = 4.4 Hz, 1H), 3.82 (s, 3H), 3.80 (s, 3H), 3.63 (d, *J* = 18.2 Hz, 1H), 3.31 (d, *J* = 18.2 Hz, 1H), 2.35 (d, *J* = 4.5 Hz, 1H), 1.88 (s, 3H), 1.30 (s, 3H).

<sup>13</sup>C NMR (101 MHz, CDCl<sub>3</sub>)  $\delta$  (ppm): 207.00, 173.34, 170.47, 133.87, 132.43, 131.84, 129.18, 128.67, 125.89, 125.49, 125.28, 125.22, 122.53, 79.42, 70.02, 61.83, 53.95, 53.33, 52.44, 52.13, 23.18, 16.03.

IR (neat cm<sup>-1</sup>): 1781, 1732, 1595, 1297, 1146, 1116, 1106, 1017.

HRMS-EI (*m/z*): [M]<sup>+</sup> calcd. for C<sub>22</sub>H<sub>23</sub>NO<sub>5</sub>, 381.1571; found, 381.1568.

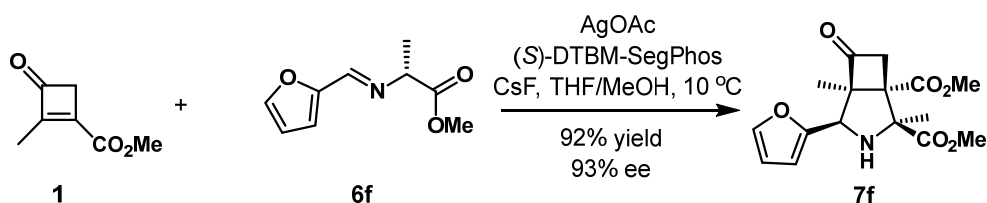

**Dimethyl (1*S*,2*S*,4*R*,5*S*)-4-(furan-2-yl)-2,5-dimethyl-6-oxo-3-azabicyclo[3.2.0]heptane-1,2-dicarboxylate (**7f**)**

Prepared according to **General Procedure B** using **1** (28.6 mg, 0.204 mmol), **6f** (73.7 mg, 0.407 mmol), AgOAc (3.8 mg, 22.8  $\mu$ mol), CsF (12.5 mg, 82.3  $\mu$ mol), (*S*)-DTBM-SegPhos (26.5 mg, 22.5  $\mu$ mol) in THF (3.0 mL) and MeOH (0.3 mL) at 10 °C for 21 h; flash chromatography on silica gel (pre-neutralized with 1% NEt<sub>3</sub> in PE, PE:EA = 8:1) provided **7f** (60.0 mg, 0.187 mmol, 92% yield).

Ee: 93% (Chiralcel<sup>®</sup>OD-H; 10% *i*-PrOH in hexanes; flow rate = 1.0 mL/min, detection at 210 nm; t<sub>1</sub> = 10.1 min (minor); t<sub>2</sub> = 12.5

min (major)).

$[\alpha]_D^{23}$   $-38.3$  (c 1.0,  $\text{CHCl}_3$ ).

$^1\text{H NMR}$  (400 MHz,  $\text{CDCl}_3$ )  $\delta$  (ppm): 7.43 – 7.29 (m, 1H), 6.34 – 6.24 (m, 2H), 4.32 (d,  $J = 7.9$  Hz, 1H), 3.78 (s, 3H), 3.77 (s, 3H), 3.46 (d,  $J = 18.3$  Hz, 1H), 3.20 (d,  $J = 18.3$  Hz, 1H), 3.04 (d,  $J = 8.2$  Hz, 1H), 1.66 (s, 3H), 1.29 (s, 3H).

$^{13}\text{C NMR}$  (101 MHz,  $\text{CDCl}_3$ )  $\delta$  (ppm): 205.56, 172.61, 170.29, 149.85, 142.61, 110.29, 107.62, 78.69, 70.48, 63.48, 55.02, 52.63, 52.24, 52.20, 22.39, 15.84.

IR (neat  $\text{cm}^{-1}$ ): 2958, 2917, 2849, 1784, 1728, 1540, 1506, 1437, 1281, 1150, 1174, 1013.

HRMS-ESI ( $m/z$ ):  $[\text{M}+\text{H}]^+$  calcd. for  $\text{C}_{16}\text{H}_{20}\text{NO}_6$ , 322.1285; found, 322.1285.

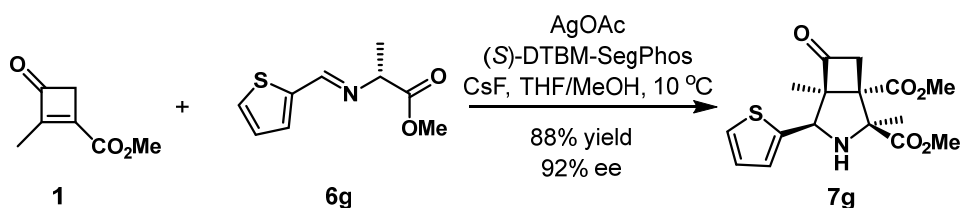

#### Dimethyl (1*S*,2*S*,4*R*,5*S*)-2,5-dimethyl-6-oxo-4-(thiophen-2-yl)-3-azabicyclo[3.2.0]heptane-1,2-dicarboxylate (**7g**)

Prepared according to **General Procedure B** using **1** (28.0 mg, 0.200 mmol), **6g** (79.4 mg, 0.403 mmol), AgOAc (3.6 mg, 21.6  $\mu\text{mol}$ ), CsF (12.0 mg, 79.0  $\mu\text{mol}$ ), (*S*)-DTBM-SegPhos (26.1 mg, 22.1  $\mu\text{mol}$ ) in THF (3.0 mL) and MeOH (0.3 mL) at 10 °C for 21 h; flash chromatography on silica gel (pre-neutralized with 1%  $\text{NEt}_3$  in PE, PE:EA = 8:1) provided **7g** (59.1 mg, 0.175 mmol, 88% yield).

Ee: 92% (Chiralcel<sup>®</sup> AD-H; 10% *i*-PrOH in hexanes; flow rate = 1.0 mL/min, detection at 210 nm;  $t_1$  = 10.2 min (minor);  $t_2$  = 11.7 min (major)).

$[\alpha]_D^{22}$   $-29.0$  (c 1.3,  $\text{CHCl}_3$ ).

$^1\text{H NMR}$  (400 MHz,  $\text{CDCl}_3$ )  $\delta$  (ppm): 7.24 – 7.16 (m, 1H), 7.09 – 6.91 (m, 2H), 4.59 (d,  $J = 4.2$  Hz, 1H), 3.78 (s, 3H), 3.77 (s, 3H), 3.51 (d,  $J = 18.1$  Hz, 1H), 3.25 (d,  $J = 18.1$  Hz, 1H), 2.59 (d,  $J = 4.8$  Hz, 1H), 1.73 (s, 3H), 1.29 (s, 3H).

$^{13}\text{C NMR}$  (101 MHz,  $\text{CDCl}_3$ )  $\delta$  (ppm): 205.95, 172.77, 170.30, 140.75, 126.87, 124.78, 124.42, 78.26, 69.93, 64.25, 53.98, 53.46, 52.49, 52.15, 23.02, 15.55.

IR (neat  $\text{cm}^{-1}$ ): 3326, 1783, 1735, 1437, 1310, 1289, 1261, 1140, 1098, 1018.

HRMS-ESI ( $m/z$ ):  $[\text{M}+\text{H}]^+$  calcd. for  $\text{C}_{16}\text{H}_{20}\text{SNO}_5$ , 338.1057; found, 338.1057.

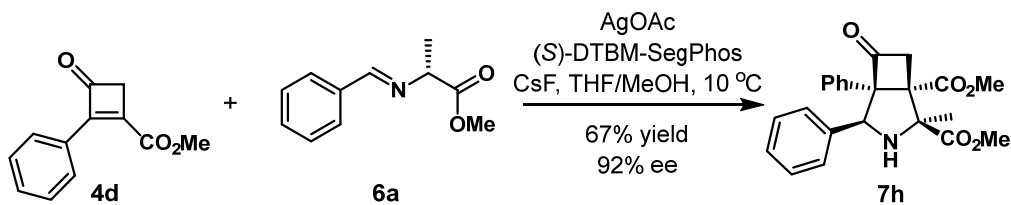

### Dimethyl (1*S*,2*S*,4*S*,5*S*)-2-methyl-6-oxo-4,5-diphenyl-3-azabicyclo[3.2.0]heptane-1,2-dicarboxylate (**7h**)

Prepared according to **General Procedure B** using **4d** (40.9 mg, 0.202 mmol), **6a** (78.3 mg, 0.409 mmol), AgOAc (3.9 mg, 23.4  $\mu\text{mol}$ ), CsF (11.6 mg, 76.3  $\mu\text{mol}$ ), (*S*)-DTBM-SegPhos (28.0 mg, 23.7  $\mu\text{mol}$ ) in THF (3.0 mL) and MeOH (0.3 mL) at 10 °C for 21 h; flash chromatography on silica gel (pre-neutralized with 1%  $\text{NEt}_3$  in PE, PE:acetone = 20:1) provided **7h** (53.6 mg, 0.136 mmol, 67% yield).

Ee: 92% (Chiralcel<sup>®</sup>OD-H; 10% *i*-PrOH in hexanes; flow rate = 1.0 mL/min, detection at 210 nm;  $t_1$  = 7.5 min (minor);  $t_2$  = 17.8 min (major)).

$[\alpha]_D^{21}$  -44.6 (c 0.9,  $\text{CHCl}_3$ ).

$^1\text{H NMR}$  (400 MHz,  $\text{CDCl}_3$ )  $\delta$  (ppm): 7.35 – 7.17 (m, 8H), 7.06 – 6.90 (m, 2H), 4.71 (d,  $J$  = 4.1 Hz, 1H), 3.82 (s, 3H), 3.67 (d,  $J$  = 18.2 Hz, 1H), 3.31 (s, 3H), 3.21 (d,  $J$  = 18.3 Hz, 1H), 2.36 (d,  $J$  = 4.1 Hz, 1H), 2.13 (s, 3H).

$^{13}\text{C NMR}$  (101 MHz,  $\text{CDCl}_3$ )  $\delta$  (ppm): 204.45, 173.51, 170.53, 135.89, 135.33, 128.37, 128.31, 127.92, 127.52, 127.14, 126.40, 85.60, 70.00, 69.58, 55.44, 54.48, 52.55, 51.65, 23.50.

IR (neat  $\text{cm}^{-1}$ ): 3339, 1783, 1735, 1497, 1447, 1435, 1373, 1274, 1124, 1106, 1073.

HRMS-ESI ( $m/z$ ):  $[\text{M}+\text{H}]^+$  calcd. for  $\text{C}_{23}\text{H}_{24}\text{NO}_5$ , 394.1649; found, 394.1645.

### Synthesis of **7h** on a 1 mmol scale:

Prepared according to **General Procedure B** using **4d** (0.204 g, 1.01 mmol), **6a** (0.382 g, 2.00 mmol), AgOAc (16.9 mg, 0.101 mmol), CsF (60.9 mg, 0.401 mmol), (*S*)-DTBM-SegPhos (0.131 g, 0.111 mmol) in THF (15 mL) and MeOH (1.5 mL) at 10 °C for 22 h; flash chromatography on silica gel (pre-neutralized with 1%  $\text{NEt}_3$  in PE, PE:acetone = 20:1) provided **7h** (0.288 g, 0.732 mmol, 72% yield).

Ee: 94% (Chiralcel<sup>®</sup>OD-H; 10% *i*-PrOH in hexanes; flow rate = 1.0 mL/min, detection at 210 nm;  $t_1$  = 7.5 min (minor);  $t_2$  = 17.8 min (major)).

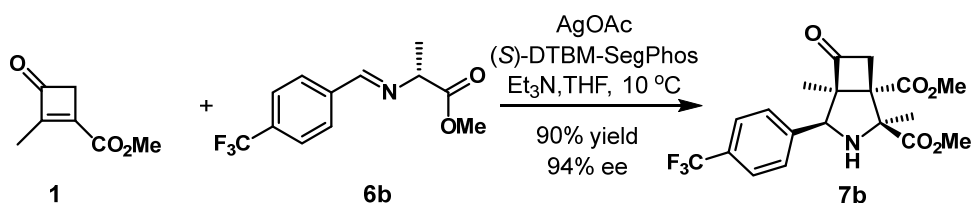

**Dimethyl (1*S*,2*S*,4*S*,5*S*)-2,5-dimethyl-6-oxo-4-(4-(trifluoromethyl)phenyl)-3-azabicyclo[3.2.0]heptane-1,2-dicarboxylate (7b)**

Prepared according to **General Procedure A** using **1** (27.8 mg, 0.198 mmol), **6b** (104.3 mg, 0.403 mmol), AgOAc (3.6 mg, 21.6  $\mu$ mol), NEt<sub>3</sub> (5.6  $\mu$ L, 4.1 mg, 40.0  $\mu$ mol), (*S*)-DTBM-SegPhos (26.2 mg, 22.2  $\mu$ mol) in THF (3.1 mL) at 10 °C for 22 h; flash chromatography on silica gel (pre-neutralized with 1% NEt<sub>3</sub> in PE, PE:A = 8:1) provided **7b** (71.5 mg, 0.179 mmol, 90% yield).

Ee: 94% (Chiralcel<sup>®</sup>IA; 10% *i*-PrOH in hexanes; flow rate = 1.0 mL/min, detection at 210 nm; t<sub>1</sub> = 8.1 min (minor); t<sub>2</sub> = 9.3 min (major)).

[ $\alpha$ ]<sub>D</sub><sup>22</sup> -10.8 (c 1.1, CHCl<sub>3</sub>).

<sup>1</sup>H NMR (400 MHz, CDCl<sub>3</sub>)  $\delta$  (ppm): 7.56 (d, *J* = 8.1 Hz, 4H), 7.43 (d, *J* = 8.1 Hz, 4H), 4.34 (d, *J* = 3.9 Hz, 1H), 3.80 (s, 3H), 3.78 (s, 3H), 3.57 (d, *J* = 18.3 Hz, 1H), 3.20 (d, *J* = 18.3 Hz, 1H), 2.30 (d, *J* = 4.3 Hz, 1H), 1.76 (s, 3H), 1.24 (s, 3H).

<sup>13</sup>C NMR (101 MHz, CDCl<sub>3</sub>)  $\delta$  (ppm): 206.52, 173.08, 170.31, 140.90, 130.51 (q, *J* = 32.5 Hz), 127.60, 125.23 (q, *J* = 3.8 Hz), 124.00 (q, *J* = 273.2), 78.06, 70.04, 67.66, 53.46, 53.38, 52.50, 52.22, 23.11, 15.18.

<sup>19</sup>F NMR (376 MHz, CDCl<sub>3</sub>)  $\delta$  (ppm): -62.54.

IR (neat cm<sup>-1</sup>): 2976, 2879, 1773, 1748, 1626, 1438, 1323, 1202, 1160, 1142, 1131, 1109, 1162.

HRMS-ESI (*m/z*): [M+H]<sup>+</sup> calcd. for C<sub>19</sub>H<sub>21</sub>F<sub>3</sub>NO<sub>5</sub>, 400.1366; found, 400.1364.

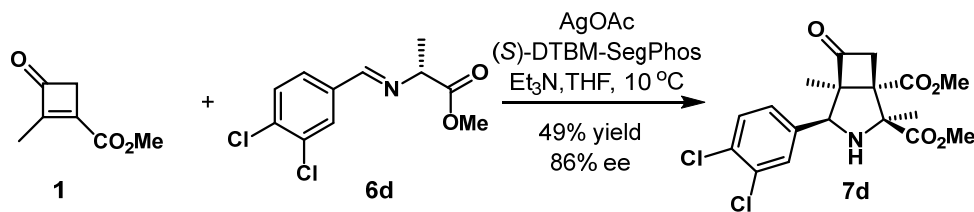**Dimethyl (1*S*,2*S*,4*S*,5*S*)-4-(3,4-dichlorophenyl)-2,5-dimethyl-6-oxo-3-azabicyclo[3.2.0]heptane-1,2-dicarboxylate (7d)**

Prepared according to **General Procedure A** using **1** (28.1 mg, 0.201 mmol), **6d** (104.2 mg, 0.401 mmol), AgOAc (3.4 mg, 20.4  $\mu$ mol), NEt<sub>3</sub> (5.6  $\mu$ L, 4.1 mg, 40.0  $\mu$ mol), (*S*)-DTBM-SegPhos (28.1 mg, 23.8  $\mu$ mol) in THF (3.1 mL) at 10 °C for 21 h; flash chromatography on silica gel (pre-neutralized with 1% NEt<sub>3</sub> in PE, PE:EA = 8:1) provided **7d** (39.0 mg, 97.4  $\mu$ mol, 49% yield).

Ee: 86% (Chiralcel<sup>®</sup>IA; 5% *i*-PrOH in hexanes; flow rate = 1.0 mL/min, detection at 210 nm; t<sub>1</sub> = 13.0 min (minor); t<sub>2</sub> = 14.5 min (major)).

[ $\alpha$ ]<sub>D</sub><sup>25</sup> 7.8 (c 1.2, CHCl<sub>3</sub>).

<sup>1</sup>H NMR (400 MHz, CDCl<sub>3</sub>)  $\delta$  (ppm): 7.44 – 7.32 (m, 2H), 7.20 – 7.08 (m, 1H), 4.23 (d, *J* = 3.4 Hz, 1H), 3.80 (s, 3H), 3.78 (s, 3H), 3.57 (d, *J* = 18.3 Hz, 1H), 3.18 (d, *J* = 18.3 Hz, 1H), 2.24 (d, *J* = 4.1 Hz, 1H), 1.74 (s, 3H), 1.22 (s, 3H).

<sup>13</sup>C NMR (101 MHz, CDCl<sub>3</sub>)  $\delta$  (ppm): 206.48, 173.01, 170.24, 137.20, 132.48, 132.31, 130.25, 129.09, 126.49, 77.82, 69.95, 66.96, 53.44, 53.33, 52.51, 52.24, 23.15, 15.16.

IR (neat cm<sup>-1</sup>): 2988, 2879, 1778, 1737, 1619, 1437, 1373, 1332, 1297, 1198, 1159, 1144, 1029.

HRMS-ESI ( $m/z$ ):  $[M+H]^+$  calcd. for  $C_{18}H_{20}Cl_2NO_5$ , 400.0713; found, 400.0709.

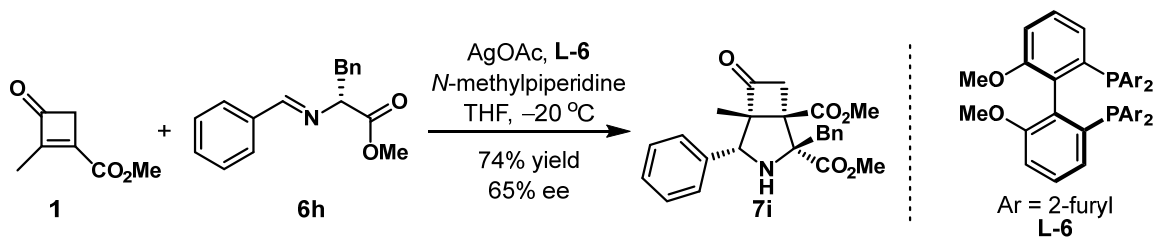

#### Dimethyl (1*R*,2*R*,4*R*,5*R*)-2-benzyl-5-methyl-6-oxo-4-phenyl-3-azabicyclo[3.2.0]heptane-1,2-dicarboxylate (**7i**)

**Procedure C:** A suspension of AgOAc (3.8 mg, 22.8  $\mu\text{mol}$ ) and L-6 (13.0 mg, 24.0  $\mu\text{mol}$ ) in THF (1.6 mL) was cooled to  $-20\text{ }^\circ\text{C}$ , and a solution of **6h** (106.3 mg, 0.398 mmol) in THF (1 mL), a solution of *N*-methylpiperidine (24  $\mu\text{L}$ , 19.6 mg, 0.198 mmol) in THF (0.4 mL), and a solution of **1** (27.8 mg, 0.198 mmol) in THF (1 mL) were sequentially added dropwise. The reaction mixture was stirred at  $-20\text{ }^\circ\text{C}$  for 33 h before quenched with H<sub>2</sub>O and diluted with DCM. The organic layer was separated, and the aqueous phase was extracted with DCM three times. The combined organic phase was washed with brine, dried over Na<sub>2</sub>SO<sub>4</sub>, concentrated and the residue was purified by column chromatography on silica gel (pre-neutralized with 1% NEt<sub>3</sub> in PE, PE:EA = 10:1) to afford product **7i** (59.9 mg, 0.147 mmol, 74% yield).

Ee: 65% (Chiralcel<sup>®</sup> AD-H; 5% *i*-PrOH in hexanes; flow rate = 1.0 mL/min, detection at 210 nm;  $t_1$  = 11.8 min (major);  $t_2$  = 41.3 min (minor)).

$[\alpha]_D^{25}$  63.5 (c 1.1, CHCl<sub>3</sub>).

<sup>1</sup>H NMR (400 MHz, CDCl<sub>3</sub>)  $\delta$  (ppm): 7.40 – 7.29 (m, 5H), 7.29 – 7.16 (m, 3H), 7.06 – 6.97 (m, 2H), 4.43 (d,  $J$  = 3.2 Hz, 1H), 3.87 (s, 3H), 3.73 (s, 3H), 3.59 (d,  $J$  = 18.2 Hz, 1H), 3.51 – 3.37 (m, 2H), 3.21 (d,  $J$  = 18.2 Hz, 1H), 2.49 (d,  $J$  = 3.6 Hz, 1H), 1.31 (s, 3H).

<sup>13</sup>C NMR (101 MHz, CDCl<sub>3</sub>)  $\delta$  (ppm): 206.81, 171.99, 170.22, 136.60, 135.82, 129.45, 128.84, 128.56, 128.30, 127.30, 127.29, 78.21, 74.17, 68.44, 54.15, 53.02, 52.40, 52.15, 38.68, 15.17.

IR (neat cm<sup>-1</sup>): 1780, 1736, 1496, 1448, 1372, 1321, 1278, 1262, 1201, 1091, 1062, 1046, 1031.

HRMS-ESI ( $m/z$ ):  $[M+H]^+$  calcd. for  $C_{24}H_{26}NO_5$ , 408.1805; found, 408.1802.

## 1.5 Further Transformations of Cycloadducts

Dimethyl (2*S*,3*S*,4*R*,5*R*)-3-(2-methoxy-2-oxoethyl)-4,5-diphenylpyrrolidine-2,3-dicarboxylate (**8**) and dimethyl (2*R*,3*S*,4*S*,5*R*)-3-(2-methoxy-2-oxoethyl)-4,5-diphenylpyrrolidine-2,3-dicarboxylate (*epi*-**8**)

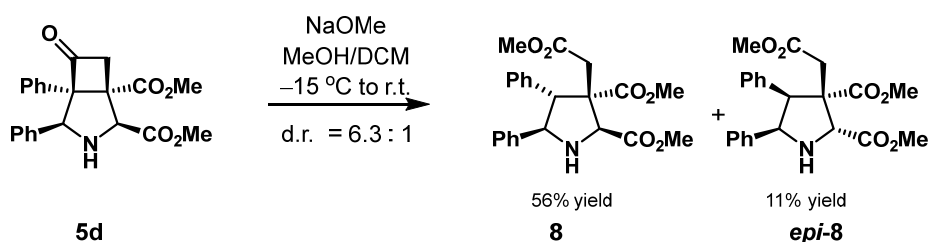

A solution of NaOMe (65.2 mg, 1.21 mmol) in MeOH (2 mL) was added dropwise to a solution of compound **5d** (0.295g, 0.777 mmol) in MeOH (2 mL) and DCM (2 mL) at  $-15\text{ }^{\circ}\text{C}$ . The reaction mixture was stirred at  $-15\text{ }^{\circ}\text{C}$  for 1 h, then stirred at room temperature for another 16 h before quenched with an aqueous solution of HCl (2M). The organic solvent was removed, and the resulting mixture was neutralized with an aqueous solution of  $\text{NaHCO}_3$  and diluted with DCM. The organic layer was separated, and the aqueous phase was extracted with DCM three times. The combined organic phase was washed with brine, dried over  $\text{Na}_2\text{SO}_4$ , concentrated and the residue was purified by column chromatography on silica gel (pre-neutralized with 1%  $\text{NEt}_3$  in PE, PE:Et<sub>2</sub>O = 3:1) to afford product **8** (0.178 g, 0.432 mmol, 56% yield) and *epi*-**8** (34.6 mg, 84.1  $\mu\text{mol}$ , 11% yield). <sup>1</sup>H NMR analysis of the crude reaction mixture revealed a diastereomer ratio of 6.3:1.

### **8:**

Ee: 97% (Chiralcel<sup>®</sup>AD-H; 10% *i*-PrOH in hexanes; flow rate = 1.0 mL/min, detection at 210 nm;  $t_1 = 26.7$  min (minor);  $t_2 = 29.7$  min (major)).

$[\alpha]_{\text{D}}^{33} -34.9$  (c 1.0,  $\text{CHCl}_3$ ).

<sup>1</sup>H NMR (400 MHz,  $\text{CDCl}_3$ )  $\delta$  (ppm): 7.43 – 7.36 (m, 2H), 7.29 – 7.10 (m, 6H), 7.10 – 7.00 (m, 2H), 5.07 – 4.55 (m, 2H), 3.74 (s, 3H), 3.63 (s, 3H), 3.48 – 3.35 (m, 4H), 3.03 (d,  $J = 17.8$  Hz, 1H), 2.70 (d,  $J = 17.8$  Hz, 1H).

<sup>13</sup>C NMR (101 MHz,  $\text{CDCl}_3$ )  $\delta$  (ppm): 173.97, 172.59, 171.51, 141.74, 134.98, 128.92, 128.26, 128.18, 127.74, 127.24, 64.67, 64.59, 61.42, 59.25, 51.94, 51.79, 51.68, 37.65.

IR (neat  $\text{cm}^{-1}$ ): 3030, 2948, 1736, 1603, 1492, 1436, 1362, 1214, 1201, 1174.

HRMS-EI ( $m/z$ ):  $[\text{M}]^+$  calcd. for  $\text{C}_{23}\text{H}_{25}\text{NO}_6$ , 411.1676; found, 411.1675.

### *epi*-**8:**

Ee: 96% (Chiralcel<sup>®</sup>AD-H; 10% *i*-PrOH in hexanes; flow rate = 1.0 mL/min, detection at 210 nm;  $t_1 = 16.2$  min (minor);  $t_2 = 19.2$  min (major)).

$[\alpha]_{\text{D}}^{26} -123.4$  (c 1.2,  $\text{CHCl}_3$ ).

<sup>1</sup>H NMR (400 MHz,  $\text{CDCl}_3$ )  $\delta$  (ppm): 7.36 – 7.19 (m, 2H), 7.14 – 6.78 (m, 8H), 5.64 (d,  $J = 6.7$  Hz, 1H), 4.50 (d,  $J = 6.7$  Hz, 1H),



4.07 (s, 1H), 3.78 (s, 3H), 3.74 (s, 3H), 3.52 (s, 3H), 3.08 (d,  $J = 17.6$  Hz, 1H), 2.91 (brs, 1H), 2.00 (d,  $J = 17.5$  Hz, 1H).

$^{13}\text{C}$  NMR (101 MHz,  $\text{CDCl}_3$ )  $\delta$  (ppm): 173.26, 173.21, 171.42, 141.91, 136.91, 130.39, 127.82, 127.45, 126.87, 126.70, 125.59, 67.23, 63.79, 60.17, 56.03, 52.70, 52.47, 51.49, 38.14.

IR (neat  $\text{cm}^{-1}$ ): 3341, 3029, 2900, 2876, 1743, 1604, 1494, 1436, 1357, 1213, 1174.

HRMS-EI ( $m/z$ ):  $[\text{M}]^+$  calcd. for  $\text{C}_{23}\text{H}_{25}\text{NO}_6$ , 411.1676; found, 411.1678.

#### Dimethyl (2S,3S,4R,5R)-3-(2-methoxy-2-oxoethyl)-4,5-diphenyl-1-tosylpyrrolidine-2,3-dicarboxylate (8-Ts):

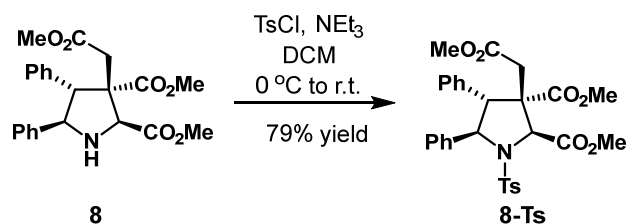

A solution of **8** (34.0 mg, 82.6  $\mu\text{mol}$ ) in DCM (0.7 mL) was added sequentially a solution of *p*-touenesulfonyl chloride (18.3 mg, 96.0  $\mu\text{mol}$ ) in DCM (0.3 mL) and  $\text{NEt}_3$  at 0  $^\circ\text{C}$ . The reaction mixture was warmed to room temperature and stirred for 3 h before it was quenched with water. The mixture was extracted with DCM, washed with brine, dried over  $\text{Na}_2\text{SO}_4$ , concentrated, and the residue was purified by column chromatography on silica gel (PE:EA = 4:1) to afford product **8-Ts** (36.9 mg, 65.2  $\mu\text{mol}$ , 79% yield).  $[\alpha]_{\text{D}}^{22} -45.1$  (c 0.8,  $\text{CHCl}_3$ ).

$^1\text{H}$  NMR (400 MHz,  $\text{CDCl}_3$ )  $\delta$  (ppm): 7.34 – 7.24 (m, 4H), 7.23 – 7.14 (m, 3H), 7.09 – 6.90 (m, 7H), 5.56 (s, 1H), 5.15 (d,  $J = 11.0$  Hz, 1H), 3.77 (s, 3H), 3.64 (s, 3H), 3.59 (d,  $J = 11.0$  Hz, 1H), 3.55 (s, 3H), 3.02 (d,  $J = 17.9$  Hz, 1H), 2.42 (d,  $J = 17.9$  Hz, 1H), 2.34 (s, 3H).

$^{13}\text{C}$  NMR (101 MHz,  $\text{CDCl}_3$ )  $\delta$  (ppm): 171.85, 170.59, 170.49, 142.76, 137.96, 137.12, 132.24, 128.81, 128.44, 128.36, 128.20, 127.91, 127.54, 127.46, 66.33, 65.59, 61.77, 55.81, 52.36, 52.16, 51.93, 37.48, 21.42.

IR (neat  $\text{cm}^{-1}$ ): 1736, 1599, 1436, 1345, 1223, 1201, 1179, 1162, 1104.

HRMS-ESI ( $m/z$ ):  $[\text{M}+\text{H}]^+$  calcd. for  $\text{C}_{30}\text{H}_{32}\text{NO}_8\text{S}$ , 566.1843; found, 566.1838.

#### Dimethyl (1S,2S,3S,4R)-1-(2-methoxy-2-oxoethyl)-3,4-diphenylcyclobutane-1,2-dicarboxylate (12)

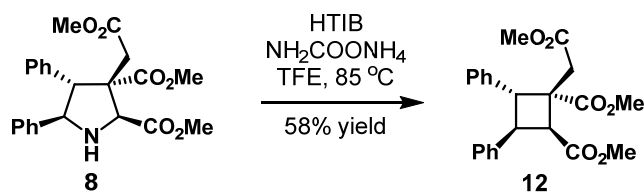

A solution of phenyliodosohydroxy tosylate (101.1 mg, 0.258 mmol), ammonium carbamate (62.5 mg, 0.801 mmol), and **8** (40.8 mg, 99.2  $\mu\text{mol}$ ) in TFE (1 mL) was heated at 85  $^\circ\text{C}$  for 3 h. Then TFE was removed, and  $\text{H}_2\text{O}$  (5 mL) and DCM were added to the

residue. The organic layer was separated, and the aqueous phase was extracted with DCM three times. The combined organic phase was washed with brine, dried over Na<sub>2</sub>SO<sub>4</sub>, concentrated and the residue was purified by column chromatography on silica gel (PE:EA = 8:1) to afford product **12** (22.6 mg, 57.1 μmol, 58% yield).

Ee: 96% (Chiralcel® AD-H; 10% *i*-PrOH in hexanes; flow rate = 1.0 mL/min, detection at 230 nm; t<sub>1</sub> = 11.2 min (minor); t<sub>2</sub> = 14.3 min (major)).

[α]<sub>D</sub><sup>21</sup> -5.6 (c 1.1, CHCl<sub>3</sub>).

<sup>1</sup>H NMR (400 MHz, CDCl<sub>3</sub>) δ (ppm): 7.34 – 7.21 (m, 5H), 7.21 – 7.10 (m, 5H), 4.72 (dd, *J* = 11.7, 9.9 Hz, 1H), 4.35 (s, 1H), 4.34 – 4.29 (m, 1H), 3.61 (s, 3H), 3.67 – 3.54 (m, 1H), 3.34 (s, 3H), 3.32 (s, 3H), 3.33 – 3.24 (m, 1H).

<sup>13</sup>C NMR (101 MHz, CDCl<sub>3</sub>) δ (ppm): 172.41, 172.00, 171.80, 138.84, 137.46, 128.40, 128.17, 127.48, 127.08, 126.81, 126.67, 51.97, 51.64, 51.57, 51.24, 50.66, 47.47, 41.36, 37.30.

IR (neat cm<sup>-1</sup>): 3030, 2998, 1731, 1604, 1497, 1435, 1358, 1205, 1166.

HRMS-ESI (*m/z*): [M+H]<sup>+</sup> calcd. for C<sub>23</sub>H<sub>25</sub>O<sub>6</sub>, 397.1646; found, 397.1646.

**Dimethyl (2*S*,3*S*,4*R*,5*R*)-3-(2-methoxy-2-oxoethyl)-2-methyl-4,5-diphenylpyrrolidine-2,3-dicarboxylate (9) and dimethyl (2*S*,3*S*,4*S*,5*R*)-3-(2-methoxy-2-oxoethyl)-2-methyl-4,5-diphenylpyrrolidine-2,3-dicarboxylate (*epi*-9)**

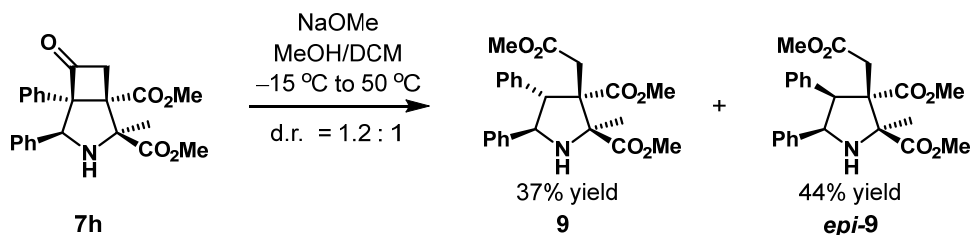

A solution of NaOMe (0.114 g, 2.11 mmol) in MeOH (8 mL) was added dropwise to a solution of compound **7h** (0.266g, 0.676 mmol) in DCM (4 mL) at -15 °C. The reaction mixture was warmed to 50 °C stirred for 24 h before quenched with an aqueous solution of HCl (1M) and neutralized with a saturated aqueous solution of NaHCO<sub>3</sub>. The organic solvent was removed, and the resulting mixture was extracted with DCM, washed with brine, dried over Na<sub>2</sub>SO<sub>4</sub>, concentrated and the residue was purified by column chromatography on silica gel (PE:EA = 6:1) to afford product **9** (0.105 g, 0.247 mmol, 37% yield) and *epi*-**9** (0.127 g, 0.298 mmol, 44% yield). <sup>1</sup>H NMR analysis of the crude reaction mixture revealed a diastereomer ratio of 1:1.2.

**9:**

[α]<sub>D</sub><sup>24</sup> -30.9 (c 1.1, CHCl<sub>3</sub>).

<sup>1</sup>H NMR (400 MHz, CDCl<sub>3</sub>) δ (ppm): 7.59 – 7.37 (m, 2H), 7.28 – 7.07 (m, 8H), 5.13 (d, *J* = 11.1 Hz, 1H), 3.77 (s, 3H), 3.64 (d, *J* = 11.1 Hz, 1H), 3.61 (s, 3H), 3.53 (s, 3H), 2.97 (d, *J* = 17.9 Hz, 1H), 2.91 – 2.68 (brs, 1H), 2.42 (d, *J* = 17.9 Hz, 1H), 1.82 (s, 3H).

<sup>13</sup>C NMR (101 MHz, CDCl<sub>3</sub>) δ (ppm): 175.99, 170.76, 170.54, 142.53, 134.87, 129.17, 128.34, 128.10, 127.88, 127.42, 126.96, 71.54, 63.71, 62.27, 61.50, 52.20, 51.44, 51.38, 38.27, 21.91.

IR (neat  $\text{cm}^{-1}$ ): 3375, 1724, 1602, 1495, 1454, 1435, 1364, 1214, 1174, 1124, 1052.

HRMS-ESI ( $m/z$ ):  $[\text{M}+\text{H}]^+$  calcd. for  $\text{C}_{24}\text{H}_{28}\text{NO}_6$ , 426.1911; found, 426.1907.

***epi-9***:

$[\alpha]_{\text{D}}^{24}$   $-70.6$  (c 1.0,  $\text{CHCl}_3$ ).

$^1\text{H}$  NMR (400 MHz,  $\text{CDCl}_3$ )  $\delta$  (ppm): 7.24 – 7.11 (m, 4H), 7.09 – 7.03 (m, 2H), 7.03 – 6.88 (m, 4H), 5.08 (d,  $J = 6.3$  Hz, 1H), 4.51 (d,  $J = 6.3$  Hz, 1H), 3.86 (s, 3H), 3.84 (s, 3H), 3.21 (s, 3H), 3.17 (d,  $J = 16.9$  Hz, 2H), 2.29 (d,  $J = 16.8$  Hz, 1H), 1.59 (s, 3H).

$^{13}\text{C}$  NMR (101 MHz,  $\text{CDCl}_3$ )  $\delta$  (ppm): 174.31, 174.23, 171.53, 138.84, 136.70, 127.57, 127.31, 126.74, 126.46, 126.12, 70.04, 64.30, 62.95, 58.26, 52.70, 52.31, 51.35, 38.28, 23.76.

IR (neat  $\text{cm}^{-1}$ ): 3333, 1733, 1497, 1455, 1435, 1356, 1267, 1221, 1197, 1175, 1124, 1061.

HRMS-ESI ( $m/z$ ):  $[\text{M}+\text{H}]^+$  calcd. for  $\text{C}_{24}\text{H}_{28}\text{NO}_6$ , 426.1911; found, 426.1910.

**(2*S*,3*S*,4*R*)-3-(2-methoxy-2-oxoethyl)-2,3-bis(methoxycarbonyl)-2-methyl-4,5-diphenyl-3,4-dihydro-2*H*-pyrrole 1-oxide**

**(10)**

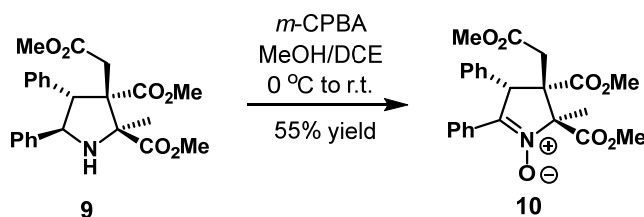

A solution of **9** (15.1 mg, 35.5  $\mu\text{mol}$ ) in DCE (0.5 mL) was added a solution of *m*-CPBA (85%, 22.4 mg, 0.110 mmol) in DCE (0.7 mL) at 0  $^{\circ}\text{C}$ . Then the reaction mixture was warmed to room temperature and stirred for 23 h before quenched with a cold 5% aqueous solution of  $\text{Na}_2\text{S}_2\text{O}_3$ . The resulting mixture was extracted with DCM, and the combined organic phase was washed with a cold 5% aqueous solution of  $\text{K}_2\text{CO}_3$ , brine, dried over  $\text{Na}_2\text{SO}_4$  and concentrated. The residue was purified by column chromatography on silica gel (PE:acetone = 4:1) to afford product **10** (8.6 mg, 19.6  $\mu\text{mol}$ , 55% yield).

$[\alpha]_{\text{D}}^{25}$  158.8 (c 0.3,  $\text{CHCl}_3$ ).

$^1\text{H}$  NMR (400 MHz,  $\text{CDCl}_3$ )  $\delta$  (ppm): 8.02 – 7.78 (m, 2H), 7.39 – 7.13 (m, 6H), 7.07 – 6.90 (m, 2H), 4.82 (s, 1H), 3.80 (s, 3H), 3.70 (s, 3H), 3.46 (d,  $J = 17.7$  Hz, 1H), 3.29 (s, 3H), 2.66 (d,  $J = 17.7$  Hz, 1H), 2.15 (s, 3H).

$^{13}\text{C}$  NMR (101 MHz,  $\text{CDCl}_3$ )  $\delta$  (ppm): 169.82, 169.61, 168.17, 141.29, 134.45, 129.84, 129.62, 128.50, 128.48, 128.30, 128.15, 127.88, 84.71, 57.67, 56.02, 53.49, 51.89, 51.87, 38.03, 17.67.

IR (neat  $\text{cm}^{-1}$ ): 1736, 1578, 1553, 1495, 1436, 1363, 1261, 1211, 1178, 1141, 1051.

HRMS-EI ( $m/z$ ):  $[\text{M}]^+$  calcd. for  $\text{C}_{24}\text{H}_{25}\text{NO}_7$ , 439.1626; found, 439.1625.

(2*S*,3*S*,4*S*)-3-(2-methoxy-2-oxoethyl)-2,3-bis(methoxycarbonyl)-2-methyl-4,5-diphenyl-3,4-dihydro-2*H*-pyrrole 1-oxide

(*epi*-10)

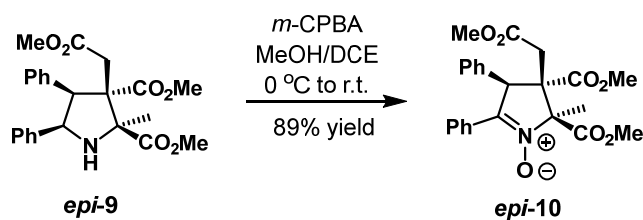

A solution of *epi*-9 (18.2 mg, 42.8  $\mu$ mol) in DCE (0.7 mL) was added a solution of *m*-CPBA (85%, 27.7 mg, 0.136 mmol) in DCE (0.8 mL) at 0 °C. Then the reaction mixture was warmed to room temperature and stirred for 12 h before it was quenched with a cold 5% aqueous solution of Na<sub>2</sub>S<sub>2</sub>O<sub>3</sub>. The resulting mixture was extracted with DCM, and the combined organic phase was washed with a cold 5% aqueous solution of K<sub>2</sub>CO<sub>3</sub>, brine, dried over Na<sub>2</sub>SO<sub>4</sub> and concentrated. The residue was purified by column chromatography on silica gel (PE:Acetone = 4:1) to afford product *epi*-10 (16.8 mg, 38.2  $\mu$ mol, 89% yield).

$[\alpha]_D^{25}$  -226.9 (c 0.7, CHCl<sub>3</sub>).

<sup>1</sup>H NMR (400 MHz, CDCl<sub>3</sub>)  $\delta$  (ppm): 8.43 – 8.07 (m, 2H), 7.37 – 7.27 (m, 5H), 7.24 – 7.14 (m, 3H), 5.62 (s, 1H), 3.82 (s, 3H), 3.80 (s, 3H), 3.45 (s, 3H), 3.11 (d, *J* = 17.3 Hz, 1H), 2.00 (d, *J* = 17.3 Hz, 1H), 1.80 (s, 3H).

<sup>13</sup>C NMR (101 MHz, CDCl<sub>3</sub>)  $\delta$  (ppm): 171.99, 171.00, 169.07, 143.76, 136.05, 131.09, 130.40, 128.63, 128.32, 128.17, 128.04, 84.46, 53.84, 53.09, 52.91, 52.79, 51.84, 36.55, 20.26.

IR (neat cm<sup>-1</sup>): 1737, 1556, 1438, 1363, 1287, 1252, 1216, 1050.

HRMS-EI (*m/z*): [M]<sup>+</sup> calcd. for C<sub>24</sub>H<sub>25</sub>NO<sub>7</sub>, 439.1626; found, 439.1627.

Dimethyl (2*S*,3*S*,4*S*)-3-(2-methoxy-2-oxoethyl)-2-methyl-4,5-diphenyl-3,4-dihydro-2*H*-pyrrole-2,3-dicarboxylate (**11**)

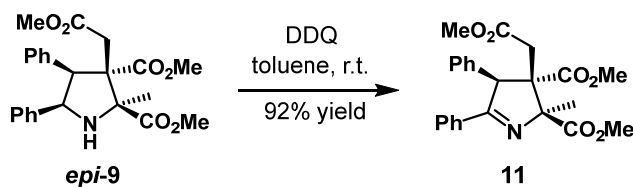

A solution of *epi*-9 (42.9 mg, 0.101 mmol) in toluene (3 mL) was added DDQ (45.5 mg, 0.200 mmol) at room temperature. The reaction mixture was stirred at room temperature for another 9 h before quenched with a saturated aqueous solution of NaHCO<sub>3</sub>. The resulting mixture was extracted with DCM, washed with brine, dried over Na<sub>2</sub>SO<sub>4</sub>, concentrated and the residue was purified by column chromatography on silica gel (PE:EA = 6:1) to afford product **11** (39.3 mg, 92.8  $\mu$ mol, 92% yield).

$[\alpha]_D^{26}$  -259.7 (c 0.5, CHCl<sub>3</sub>).

<sup>1</sup>H NMR (400 MHz, CDCl<sub>3</sub>)  $\delta$  (ppm): 7.72 – 7.62 (m, 2H), 7.29 – 7.05 (m, 8H), 5.59 (s, 1H), 3.73 (s, 3H), 3.72 (s, 3H), 3.29 (s, 3H), 3.06 (d, *J* = 17.4 Hz, 1H), 1.96 (d, *J* = 17.4 Hz, 1H), 1.56 (s, 3H).

<sup>13</sup>C NMR (101 MHz, CDCl<sub>3</sub>)  $\delta$  (ppm): 174.25, 173.38, 172.65, 171.49, 135.67, 132.98, 130.56, 128.89, 128.23, 128.21, 127.51,

82.94, 60.75, 60.11, 52.35, 52.33, 51.52, 36.67, 23.16.

IR (neat  $\text{cm}^{-1}$ ): 1735, 1632, 1578, 1496, 1447, 1435, 1359, 1286, 1202, 1178, 1119, 1054.

HRMS-EI ( $m/z$ ):  $[M]^+$  calcd. for  $\text{C}_{24}\text{H}_{25}\text{NO}_6$ , 423.1676; found, 423.1675.

**Dimethyl (1*S*,2*S*,3*R*,4*R*)-1-(2-methoxy-2-oxoethyl)-2-methyl-3,4-diphenylcyclobutane-1,2-dicarboxylate (**13**)**

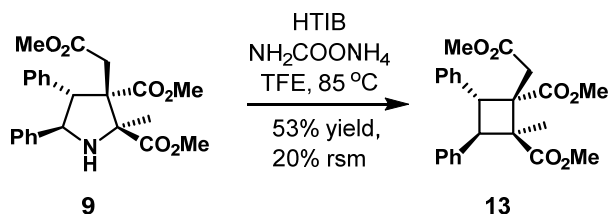

A solution of phenyliodosohydroxy tosylate (95.9 mg, 0.245 mmol), ammonium carbamate (60.6 mg, 0.776 mmol), and **9** (36.8 mg, 86.5  $\mu\text{mol}$ ) in TFE (1 mL) was stirred at 85 °C for 7 h before quenched with water. The resulting mixture was extracted with DCM, washed with brine, dried over  $\text{Na}_2\text{SO}_4$ , concentrated and the residue was purified by column chromatography on silica gel (PE:Acetone = 10:1) to afford product **13** (18.7 mg, 45.6  $\mu\text{mol}$ , 53% yield) and recovered starting material **9** (7.5 mg, 17.6  $\mu\text{mol}$ , 20% yield)

$[\alpha]_{\text{D}}^{23}$  15.7 (c 0.8,  $\text{CHCl}_3$ ).

$^1\text{H}$  NMR (400 MHz,  $\text{CDCl}_3$ )  $\delta$  (ppm): 7.29 – 7.22 (m, 4H), 7.21 – 7.13 (m, 4H), 7.12 – 7.05 (m, 2H), 4.49 (s, 2H), 3.64 (s, 3H), 3.55 (d,  $J = 16.9$  Hz, 1H), 3.36 (s, 3H), 3.29 (s, 3H), 3.25 (d,  $J = 16.9$  Hz, 1H), 1.78 (s, 3H).

$^{13}\text{C}$  NMR (101 MHz,  $\text{CDCl}_3$ )  $\delta$  (ppm): 172.95, 171.97, 171.94, 139.08, 138.94, 128.13, 128.12, 126.74, 126.70, 126.59, 56.61, 55.20, 51.53, 51.51, 51.48, 49.80, 47.60, 39.15, 20.67.

IR (neat  $\text{cm}^{-1}$ ): 1728, 1604, 1497, 1448, 1434, 1356, 1252, 1201, 1170, 1155, 1126, 1053.

HRMS-EI ( $m/z$ ):  $[M]^+$  calcd. for  $\text{C}_{24}\text{H}_{26}\text{O}_6$ , 410.1724; found, 410.1725.

**Dimethyl (1*S*,2*S*,4*S*,5*S*,6*S*)-6-hydroxy-2,5-dimethyl-4-phenyl-3-azabicyclo[3.2.0]heptane-1,2-dicarboxylate (**S2**)**

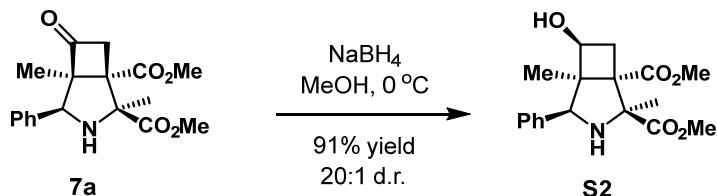

A solution of sodium borohydride (0.113 g, 2.98 mmol) in MeOH (15 mL) was cooled to 0 °C, then a solution of **7a** (0.483 g, 1.46 mmol) in MeOH (35 mL) was added. The reaction mixture was stirred at 0 °C for 45 min before quenched with a saturated aqueous solution of  $\text{NH}_4\text{Cl}$ . The mixture was concentrated, then extracted with DCM. The combined organic phase was washed with brine, dried over  $\text{Na}_2\text{SO}_4$ , concentrated and the residue was purified by column chromatography on silica gel (pre-neutralized with 1%  $\text{NEt}_3$  in PE, PE:EA = 2:1) to afford product **S2** (0.442 g, 1.33 mmol, 91% yield).  $^1\text{H}$  NMR analysis of the crude reaction mixture

revealed a diastereomer ratio of 20:1.

$[\alpha]_D^{23}$  -1.8 (c 1.2, CHCl<sub>3</sub>).

<sup>1</sup>H NMR (400 MHz, CDCl<sub>3</sub>)  $\delta$  (ppm): 7.61 – 7.52 (m, 2H), 7.40 – 7.32 (m, 2H), 7.31 – 7.21 (m, 1H), 4.41 (s, 1H), 3.85 (ddd,  $J$  = 10.3, 9.0, 6.6 Hz, 1H), 3.77 (s, 3H), 3.76 (s, 3H), 2.91 (dd,  $J$  = 13.2, 9.0 Hz, 1H), 2.49 (d,  $J$  = 10.7 Hz, 1H), 2.48 (brs, 1H), 1.97 (dd,  $J$  = 13.2, 6.6 Hz, 1H), 1.61 (s, 3H), 1.41 (s, 3H).

<sup>13</sup>C NMR (101 MHz, CDCl<sub>3</sub>)  $\delta$  (ppm): 173.85, 171.80, 138.32, 128.61, 127.59, 126.79, 72.27, 69.05, 66.54, 58.00, 55.79, 52.29, 51.71, 36.97, 23.55, 22.67.

IR (neat cm<sup>-1</sup>): 1724, 1449, 1436, 1281, 1196, 1157, 1137.

HRMS-ESI ( $m/z$ ):  $[M+H]^+$  calcd. for C<sub>18</sub>H<sub>24</sub>NO<sub>5</sub>, 334.1649; found, 334.1649.

**Dimethyl (1*S*,2*S*,4*S*,5*S*,6*S*)-6-((*tert*-butyldiphenylsilyl)oxy)-2,5-dimethyl-4-phenyl-3-azabicyclo[3.2.0]heptane-1,2-dicarboxylate (**14**)**

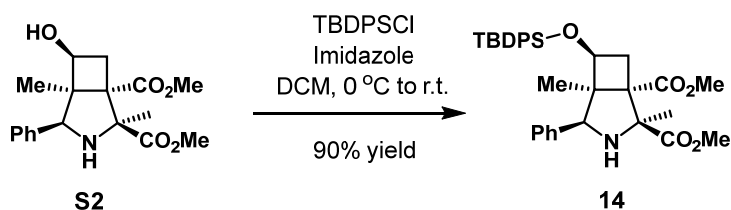

A solution of **S2** (0.182 g, 0.547 mmol) and imidazole (83.2 mg, 1.22 mmol) in DCM (6 mL) was added TBDPSCI (0.301g, 0.28 mL, 1.09 mmol) at 0 °C. The resulting mixture was stirred at 0 °C for 10 min then stirred at rt for another 6 h. The reaction mixture was quenched with water and extracted with DCM. The combined organic phase was washed with brine, dried over Na<sub>2</sub>SO<sub>4</sub>, concentrated and the residue was purified by column chromatography on silica gel (pre-neutralized with 1% NEt<sub>3</sub> in PE, PE:Acetone = 8:1) to afford product **14** (0.280 g, 0.490 mmol, 90% yield).

$[\alpha]_D^{22}$  -10.3 (c 1.0, CHCl<sub>3</sub>).

<sup>1</sup>H NMR (400 MHz, CDCl<sub>3</sub>)  $\delta$  (ppm): 7.56 – 7.49 (m, 2H), 7.41 – 7.32 (m, 2H), 7.32 – 7.19 (m, 8H), 7.17 – 7.06 (m, 3H), 4.30 (s, 1H), 3.90 (dd,  $J$  = 8.9, 7.1 Hz, 1H), 3.76 (s, 3H), 3.64 (s, 3H), 3.32 (brs, 1H), 2.46 (dd,  $J$  = 12.8, 9.0 Hz, 1H), 2.02 (dd,  $J$  = 11.8, 6.0 Hz, 1H), 1.56 (s, 3H), 1.26 (s, 3H), 0.83 (s, 9H).

<sup>13</sup>C NMR (101 MHz, CDCl<sub>3</sub>)  $\delta$  (ppm): 173.85, 171.98, 138.26, 135.72, 135.51, 133.54, 133.37, 129.57, 129.28, 128.00, 127.71, 127.40, 127.23, 126.66, 72.75, 69.61, 67.62, 60.22, 56.84, 52.29, 51.49, 36.29, 26.93, 23.92, 23.02, 18.67.

IR (neat cm<sup>-1</sup>): 1730, 1589, 1451, 1428, 1268, 1139, 1113.

HRMS-EI ( $m/z$ ):  $[M]^+$  calcd. for C<sub>34</sub>H<sub>41</sub>NO<sub>5</sub>Si, 571.2749; found, 571.2746.

Dimethyl (1*S*,2*S*,5*S*,6*S*)-6-((*tert*-butyldiphenylsilyloxy)-2,5-dimethyl-4-phenyl-3-azabicyclo[3.2.0]hept-3-ene-1,2-dicarboxylate (**15**)

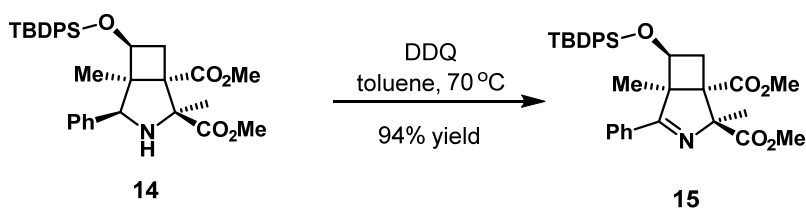

**15** was prepared according to a literature procedure<sup>6</sup>. DDQ (0.111 g, 0.487 mmol) was added to a solution of **14** (0.135 g, 0.236 mmol) in toluene (3 mL) at 50 °C. The reaction mixture was heated to 70 °C and stirred for 10 h before quenched with a saturated aqueous solution of NaHCO<sub>3</sub> and extracted with DCM. The combined organic phase was washed with brine, dried over Na<sub>2</sub>SO<sub>4</sub>, concentrated and the residue was purified by column chromatography on silica gel (PE:EA = 8:1) to afford product **15** (0.126 g, 0.221 mmol, 94% yield).

$[\alpha]_D^{27}$  -44.5 (c 1.3, CHCl<sub>3</sub>).

<sup>1</sup>H NMR (400 MHz, CDCl<sub>3</sub>)  $\delta$  (ppm): 8.16 – 8.06 (m, 2H), 7.65 – 7.57 (m, 2H), 7.56 – 7.49 (m, 2H), 7.48 – 7.23 (m, 9H), 4.28 (dd,  $J$  = 8.8, 7.7 Hz, 1H), 3.73 (s, 3H), 3.67 (s, 3H), 2.36 (dd,  $J$  = 11.9, 7.7 Hz, 1H), 1.87 (dd,  $J$  = 11.9, 8.9 Hz, 1H), 1.50 (s, 3H), 1.38 (s, 3H), 0.94 (s, 9H).

<sup>13</sup>C NMR (101 MHz, CDCl<sub>3</sub>)  $\delta$  (ppm): 173.91, 172.90, 171.25, 135.73, 135.63, 133.61, 133.33, 133.21, 130.46, 130.23, 129.86, 129.84, 127.81, 127.67, 127.58, 83.01, 71.91, 70.02, 53.25, 52.25, 51.93, 37.49, 26.82, 24.61, 20.85, 18.87.

IR (neat cm<sup>-1</sup>): 1729, 1604, 1573, 1428, 1296, 1267, 1195, 1130, 1113, 1062.

HRMS-EI ( $m/z$ ): [M]<sup>+</sup> calcd. for C<sub>34</sub>H<sub>39</sub>NO<sub>5</sub>Si, 569.2592; found, 569.2596.

(1*S*,4*S*,5*S*,7*S*)-7-((*Tert*-butyldiphenylsilyloxy)-4,5-bis(methoxycarbonyl)-1,4-dimethyl-2-phenyl-3-azabicyclo[3.2.0]hept-2-ene 3-oxide (**16**)

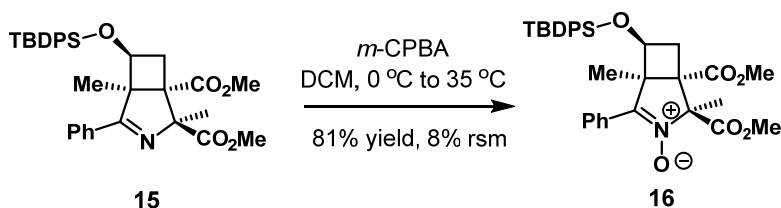

A solution of *m*-CPBA (85%, 36.7 mg, 0.180 mmol) in DCM (2 mL) was added to a solution of **15** (92.0 mg, 0.161 mmol) in DCM (1 mL) at 0 °C. After 30 min, the reaction mixture was heated to 35 °C and stirred for another 24 h before quenched with a cold 5% aqueous solution of Na<sub>2</sub>S<sub>2</sub>O<sub>3</sub>. The resulting mixture was extracted with DCM, and the combined organic phase was washed sequentially with a cold 5% aqueous solution of K<sub>2</sub>CO<sub>3</sub>, brine, dried over Na<sub>2</sub>SO<sub>4</sub> and concentrated. The residue was purified by

<sup>6</sup> S. Xu, Z.-M. Zhang, B. Xu, B. Liu, Y. Liu, J. Zhang, *J. Am. Chem. Soc.* **2018**, *140*, 2272–2283.

column chromatography on silica gel (PE:EA = 3:1) to afford product **16** (76.2 mg, 0.130 mmol, 81% yield) and recovered starting material **16** (7.3 mg, 12.8  $\mu$ mol, 8% yield).

$[\alpha]_D^{24}$  2.9 (c 1.0, CHCl<sub>3</sub>).

<sup>1</sup>H NMR (400 MHz, CDCl<sub>3</sub>)  $\delta$  (ppm): 8.62–8.49 (m, 2H), 7.66–7.55 (m, 2H), 7.55–7.49 (m, 2H), 7.49–7.28 (m, 9H), 4.45 (dd,  $J$  = 9.3, 7.6 Hz, 1H), 3.79 (s, 3H), 3.66 (s, 3H), 2.84 (dd,  $J$  = 12.3, 9.3 Hz, 1H), 2.09 (dd,  $J$  = 12.4, 7.7 Hz, 1H), 1.78 (s, 3H), 1.58 (s, 3H), 0.92 (s, 9H).

<sup>13</sup>C NMR (101 MHz, CDCl<sub>3</sub>)  $\delta$  (ppm): 169.92, 167.45, 143.11, 135.73, 135.59, 133.10, 132.91, 129.97, 129.93, 129.87, 128.85, 127.74, 127.67, 83.32, 73.05, 62.45, 52.86, 52.27, 48.72, 37.09, 26.77, 21.24, 20.99, 18.84.

IR (neat cm<sup>-1</sup>): 2952, 2858, 1741, 1520, 1428, 1302, 1266, 1228, 1133, 1111, 1061.

HRMS-ESI ( $m/z$ ):  $[M+H]^+$  calcd. for C<sub>34</sub>H<sub>40</sub>NO<sub>6</sub>Si, 586.2619; found, 586.2627.

**Methyl (3*S*,3*aR*,7*aS*)-3,7*a*-dimethyl-7-oxo-2-phenyl-4,5,7,7*a*-tetrahydro-3,5-epoxypyrano[3,4-*b*]pyrrole-3*a*(3*H*)-carboxylate (**17**)**

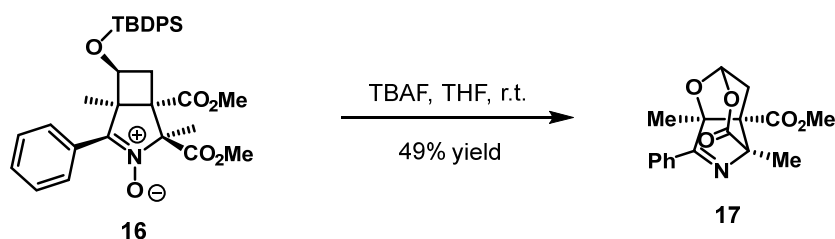

A solution of **16** (37.2 mg, 63.5  $\mu$ mol) in THF (1 mL) was added a solution of TBAF (33.2 mg, 0.105 mmol) in THF (0.3 mL). The reaction mixture was stirred at room temperature for 3.5 h before quenched with water and extracted with DCM. The combined organic phase was washed with brine, dried over Na<sub>2</sub>SO<sub>4</sub>, concentrated and the residue was purified by column chromatography on silica gel (PE:EA = 2:1) to afford product **17** (9.9 mg, 31.4  $\mu$ mol, 49% yield).

$[\alpha]_D^{29}$  50.7 (c 0.2, CHCl<sub>3</sub>).

<sup>1</sup>H NMR (400 MHz, CDCl<sub>3</sub>)  $\delta$  (ppm): 7.85–7.65 (m, 2H), 7.53–7.37 (m, 3H), 5.78 (dd,  $J$  = 2.9, 1.0 Hz, 1H), 3.75 (s, 3H), 2.56–2.50 (m, 2H), 1.79 (s, 3H), 1.46 (s, 3H).

<sup>13</sup>C NMR (101 MHz, CDCl<sub>3</sub>)  $\delta$  (ppm): 177.18, 168.57, 168.55, 132.12, 130.89, 128.47, 128.00, 100.22, 97.41, 83.17, 65.08, 52.44, 35.78, 19.77, 18.63.

IR (neat cm<sup>-1</sup>): 1736, 1612, 1575, 1458, 1376, 1318, 1272, 1206, 1139, 1108, 1055.

HRMS-ESI ( $m/z$ ):  $[M+H]^+$  calcd. for C<sub>17</sub>H<sub>18</sub>NO<sub>5</sub>, 316.1179; found, 316.1178.



Dimethyl 2-((*S,Z*)-2-((*tert*-butyldiphenylsilyloxy)-3-methyl-4-phenylbut-3-en-1-yl)-3-methylfumarate (**18**)

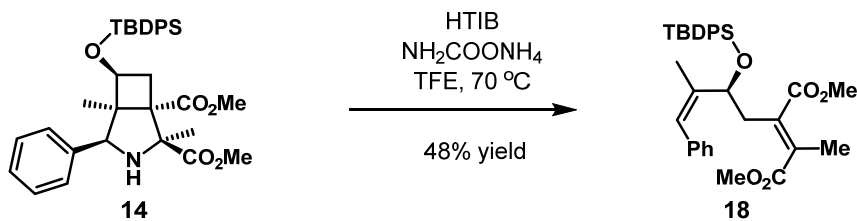

Asolution of phenyliodosohydroxy tosylate (62.3 mg, 0.159 mmol), ammonium carbamate (38.5 mg, 0.493 mmol) and **14** (33.1 mg, 57.3  $\mu\text{mol}$ ) in TFE (0.8 mL) was stirred at 70 °C for 3 h before quenched with water. The resulting mixture was extracted with DCM, washed with brine, dried over  $\text{Na}_2\text{SO}_4$ , concentrated and the residue was purified by column chromatography on silica gel (PE:EA = 30:1) to afford product **18** (15.4 mg, 27.7  $\mu\text{mol}$ , 48% yield).

$[\alpha]_D^{25}$  17.9 (c 0.8,  $\text{CHCl}_3$ ).

$^1\text{H}$  NMR (400 MHz,  $\text{CDCl}_3$ )  $\delta$  (ppm): 7.59 – 7.50 (m, 4H), 7.40 – 7.33 (m, 2H), 7.32 – 7.23 (m, 4H), 7.11 – 6.95 (m, 3H), 6.79 – 6.62 (m, 2H), 6.16 (s, 1H), 5.04 (t,  $J = 7.1$  Hz, 1H), 3.62 (s, 3H), 3.25 (s, 3H), 2.90 (qd,  $J = 13.7, 7.2$  Hz, 2H), 1.97 (s, 3H), 1.90 (d,  $J = 1.4$  Hz, 3H), 1.00 (s, 9H).

$^{13}\text{C}$  NMR (101 MHz,  $\text{CDCl}_3$ )  $\delta$  (ppm): 169.44, 167.81, 138.70, 137.66, 137.05, 135.95, 133.85, 133.79, 132.07, 129.38, 129.36, 128.61, 127.74, 127.66, 127.32, 127.24, 125.89, 69.83, 51.80, 51.22, 37.29, 26.86, 19.35, 18.24, 18.12.

IR (neat  $\text{cm}^{-1}$ ): 1722, 1493, 1473, 1428, 1253, 1222, 1203, 1111, 1068.

HRMS-ESI ( $m/z$ ):  $[\text{M}+\text{NH}_4]^+$  calcd. for  $\text{C}_{34}\text{H}_{44}\text{SiNO}_5$ , 574.2983; found, 574.2976.

## 1.6 Proposed Mechanism for the Formation of 17

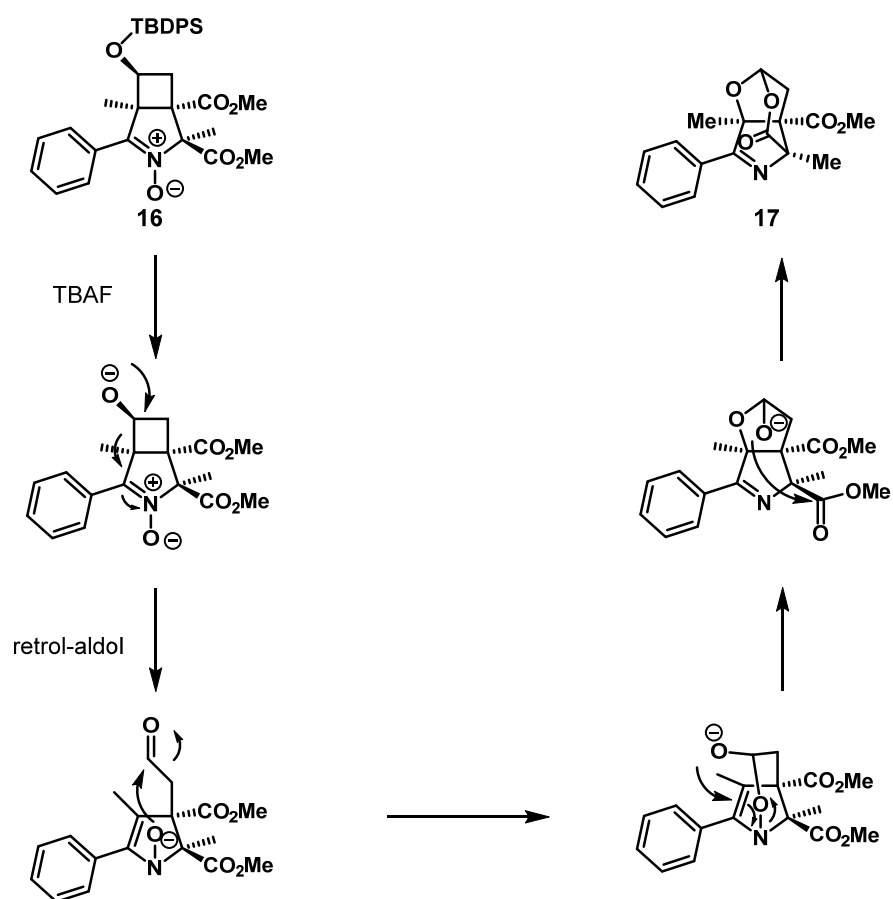

Scheme S1

## 1.7 X-ray Data of structures 3a, 5d, 7a, 8-Ts, *epi*-8, 16, and 17

X-ray Structure 3a:

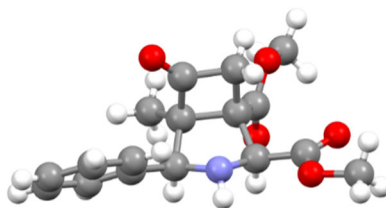

**Table S5 Crystal data and structure refinement.**

|                                             |                                                               |
|---------------------------------------------|---------------------------------------------------------------|
| Identification code                         | exp_2574                                                      |
| Empirical formula                           | C <sub>17</sub> H <sub>19</sub> NO <sub>5</sub>               |
| Formula weight                              | 317.33                                                        |
| Temperature/K                               | 173.00(10)                                                    |
| Crystal system                              | orthorhombic                                                  |
| Space group                                 | P2 <sub>1</sub> 2 <sub>1</sub> 2 <sub>1</sub>                 |
| a/Å                                         | 9.10160(10)                                                   |
| b/Å                                         | 9.87230(10)                                                   |
| c/Å                                         | 17.9089(2)                                                    |
| α/°                                         | 90                                                            |
| β/°                                         | 90                                                            |
| γ/°                                         | 90                                                            |
| Volume/Å <sup>3</sup>                       | 1609.18(3)                                                    |
| Z                                           | 4                                                             |
| ρ <sub>calc</sub> /cm <sup>3</sup>          | 1.310                                                         |
| μ/mm <sup>-1</sup>                          | 0.804                                                         |
| F(000)                                      | 672.0                                                         |
| Crystal size/mm <sup>3</sup>                | 0.42 × 0.36 × 0.24                                            |
| Radiation                                   | CuKα (λ = 1.54184)                                            |
| 2θ range for data collection/°              | 9.878 to 134.154                                              |
| Index ranges                                | -10 ≤ h ≤ 10, -11 ≤ k ≤ 11, -21 ≤ l ≤ 21                      |
| Reflections collected                       | 37119                                                         |
| Independent reflections                     | 2857 [R <sub>int</sub> = 0.0486, R <sub>sigma</sub> = 0.0161] |
| Data/restraints/parameters                  | 2857/0/216                                                    |
| Goodness-of-fit on F <sup>2</sup>           | 1.056                                                         |
| Final R indexes [I ≥ 2σ(I)]                 | R <sub>1</sub> = 0.0256, wR <sub>2</sub> = 0.0687             |
| Final R indexes [all data]                  | R <sub>1</sub> = 0.0259, wR <sub>2</sub> = 0.0690             |
| Largest diff. peak/hole / e Å <sup>-3</sup> | 0.17/-0.14                                                    |
| Flack parameter                             | 0.02(5)                                                       |

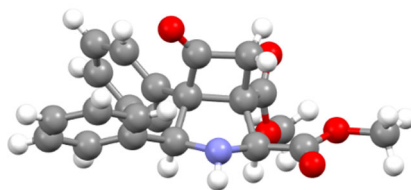**Table S6 Crystal data and structure refinement.**

|                                             |                                                                |
|---------------------------------------------|----------------------------------------------------------------|
| Identification code                         | cu_llc_3_36_0m_a                                               |
| Empirical formula                           | C <sub>22</sub> H <sub>21</sub> NO <sub>5</sub>                |
| Formula weight                              | 379.40                                                         |
| Temperature/K                               | 250                                                            |
| Crystal system                              | monoclinic                                                     |
| Space group                                 | P2 <sub>1</sub>                                                |
| a/Å                                         | 10.5662(7)                                                     |
| b/Å                                         | 6.4254(4)                                                      |
| c/Å                                         | 14.2474(9)                                                     |
| $\alpha$ /°                                 | 90                                                             |
| $\beta$ /°                                  | 91.616(3)                                                      |
| $\gamma$ /°                                 | 90                                                             |
| Volume/Å <sup>3</sup>                       | 966.90(11)                                                     |
| Z                                           | 2                                                              |
| $\rho_{\text{calc}}/\text{cm}^3$            | 1.303                                                          |
| $\mu/\text{mm}^{-1}$                        | 0.762                                                          |
| F(000)                                      | 400.0                                                          |
| Crystal size/mm <sup>3</sup>                | 0.08 × 0.05 × 0.05                                             |
| Radiation                                   | Cu K $\alpha$ ( $\lambda$ = 1.54178)                           |
| 2 $\theta$ range for data collection/°      | 6.21 to 133.91                                                 |
| Index ranges                                | -12 ≤ h ≤ 12, -7 ≤ k ≤ 7, -16 ≤ l ≤ 16                         |
| Reflections collected                       | 27515                                                          |
| Independent reflections                     | 3421 [ $R_{\text{int}}$ = 0.0502, $R_{\text{sigma}}$ = 0.0760] |
| Data/restraints/parameters                  | 3421/1/259                                                     |
| Goodness-of-fit on F <sup>2</sup>           | 1.074                                                          |
| Final R indexes [ $I \geq 2\sigma(I)$ ]     | $R_1$ = 0.0283, $wR_2$ = 0.0742                                |
| Final R indexes [all data]                  | $R_1$ = 0.0431, $wR_2$ = 0.0768                                |
| Largest diff. peak/hole / e Å <sup>-3</sup> | 0.14/-0.16                                                     |
| Flack parameter                             | 0.14(6)                                                        |

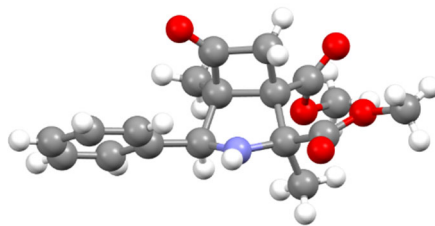**Table S7 Crystal data and structure refinement.**

|                                             |                                                               |
|---------------------------------------------|---------------------------------------------------------------|
| Identification code                         | cu_d8v22363_0m                                                |
| Empirical formula                           | C <sub>18</sub> H <sub>21</sub> NO <sub>5</sub>               |
| Formula weight                              | 331.36                                                        |
| Temperature/K                               | 293(2)                                                        |
| Crystal system                              | monoclinic                                                    |
| Space group                                 | P2 <sub>1</sub>                                               |
| a/Å                                         | 6.5148(3)                                                     |
| b/Å                                         | 18.6775(10)                                                   |
| c/Å                                         | 7.3961(4)                                                     |
| α/°                                         | 90                                                            |
| β/°                                         | 100.321(2)                                                    |
| γ/°                                         | 90                                                            |
| Volume/Å <sup>3</sup>                       | 885.40(8)                                                     |
| Z                                           | 2                                                             |
| ρ <sub>calc</sub> /cm <sup>3</sup>          | 1.243                                                         |
| μ/mm <sup>-1</sup>                          | 0.751                                                         |
| F(000)                                      | 352.0                                                         |
| Crystal size/mm <sup>3</sup>                | 0.2 × 0.15 × 0.08                                             |
| Radiation                                   | Cu Kα (λ = 1.54178)                                           |
| 2θ range for data collection/°              | 13.06 to 134.94                                               |
| Index ranges                                | -7 ≤ h ≤ 7, -22 ≤ k ≤ 22, -8 ≤ l ≤ 8                          |
| Reflections collected                       | 11336                                                         |
| Independent reflections                     | 3026 [R <sub>int</sub> = 0.0559, R <sub>sigma</sub> = 0.0536] |
| Data/restraints/parameters                  | 3026/1/222                                                    |
| Goodness-of-fit on F <sup>2</sup>           | 1.074                                                         |
| Final R indexes [I ≥ 2σ (I)]                | R <sub>1</sub> = 0.0525, wR <sub>2</sub> = 0.1364             |
| Final R indexes [all data]                  | R <sub>1</sub> = 0.0531, wR <sub>2</sub> = 0.1379             |
| Largest diff. peak/hole / e Å <sup>-3</sup> | 0.21/-0.34                                                    |
| Flack parameter                             | 0.10(10)                                                      |

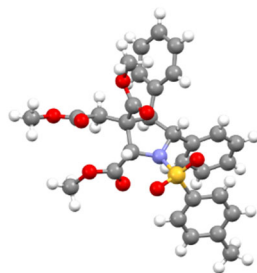**Table S8 Crystal data and structure refinement.**

|                                             |                                                               |
|---------------------------------------------|---------------------------------------------------------------|
| Identification code                         | exp_3074                                                      |
| Empirical formula                           | C <sub>30</sub> H <sub>31</sub> NO <sub>8</sub> S             |
| Formula weight                              | 565.62                                                        |
| Temperature/K                               | 173.00(10)                                                    |
| Crystal system                              | monoclinic                                                    |
| Space group                                 | P2 <sub>1</sub>                                               |
| a/Å                                         | 12.63180(10)                                                  |
| b/Å                                         | 7.14960(10)                                                   |
| c/Å                                         | 15.68420(10)                                                  |
| α/°                                         | 90                                                            |
| β/°                                         | 101.2370(10)                                                  |
| γ/°                                         | 90                                                            |
| Volume/Å <sup>3</sup>                       | 1389.32(2)                                                    |
| Z                                           | 2                                                             |
| ρ <sub>calc</sub> /cm <sup>3</sup>          | 1.352                                                         |
| μ/mm <sup>-1</sup>                          | 1.482                                                         |
| F(000)                                      | 596.0                                                         |
| Crystal size/mm <sup>3</sup>                | 0.39 × 0.36 × 0.28                                            |
| Radiation                                   | CuKα (λ = 1.54184)                                            |
| 2θ range for data collection/°              | 5.744 to 134.138                                              |
| Index ranges                                | -15 ≤ h ≤ 15, -8 ≤ k ≤ 8, -18 ≤ l ≤ 18                        |
| Reflections collected                       | 29729                                                         |
| Independent reflections                     | 4977 [R <sub>int</sub> = 0.0396, R <sub>sigma</sub> = 0.0225] |
| Data/restraints/parameters                  | 4977/1/366                                                    |
| Goodness-of-fit on F <sup>2</sup>           | 1.025                                                         |
| Final R indexes [I ≥ 2σ (I)]                | R <sub>1</sub> = 0.0240, wR <sub>2</sub> = 0.0628             |
| Final R indexes [all data]                  | R <sub>1</sub> = 0.0242, wR <sub>2</sub> = 0.0631             |
| Largest diff. peak/hole / e Å <sup>-3</sup> | 0.19/-0.19                                                    |
| Flack parameter                             | 0.000(6)                                                      |

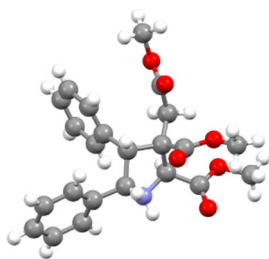**Table S9 Crystal data and structure refinement.**

|                                             |                                                               |
|---------------------------------------------|---------------------------------------------------------------|
| Empirical formula                           | C <sub>23</sub> H <sub>25</sub> NO <sub>6</sub>               |
| Formula weight                              | 411.46                                                        |
| Temperature/K                               | 172.99(10)                                                    |
| Crystal system                              | triclinic                                                     |
| Space group                                 | P-1                                                           |
| a/Å                                         | 8.9746(3)                                                     |
| b/Å                                         | 9.7722(3)                                                     |
| c/Å                                         | 12.9941(4)                                                    |
| α/°                                         | 89.169(2)                                                     |
| β/°                                         | 76.315(2)                                                     |
| γ/°                                         | 69.111(3)                                                     |
| Volume/Å <sup>3</sup>                       | 1031.41(6)                                                    |
| Z                                           | 2                                                             |
| ρ <sub>calc</sub> /cm <sup>3</sup>          | 1.3248                                                        |
| μ/mm <sup>-1</sup>                          | 0.791                                                         |
| F(000)                                      | 437.5                                                         |
| Crystal size/mm <sup>3</sup>                | 0.42 × 0.36 × 0.32                                            |
| Radiation                                   | Cu Kα (λ = 1.54184)                                           |
| 2θ range for data collection/°              | 7.02 to 134.12                                                |
| Index ranges                                | -11 ≤ h ≤ 11, -12 ≤ k ≤ 12, -16 ≤ l ≤ 16                      |
| Reflections collected                       | 22027                                                         |
| Independent reflections                     | 3656 [R <sub>int</sub> = 0.0345, R <sub>sigma</sub> = 0.0217] |
| Data/restraints/parameters                  | 3656/0/274                                                    |
| Goodness-of-fit on F <sup>2</sup>           | 1.039                                                         |
| Final R indexes [I ≥ 2σ (I)]                | R <sub>1</sub> = 0.0317, wR <sub>2</sub> = 0.0778             |
| Final R indexes [all data]                  | R <sub>1</sub> = 0.0336, wR <sub>2</sub> = 0.0792             |
| Largest diff. peak/hole / e Å <sup>-3</sup> | 0.24/-0.15                                                    |

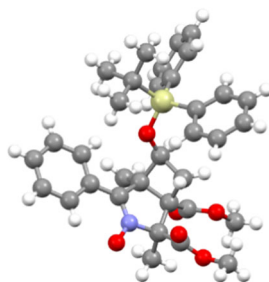**Table S11 Crystal data and structure refinement.**

|                                             |                                                               |
|---------------------------------------------|---------------------------------------------------------------|
| Identification code                         | exp_3145                                                      |
| Empirical formula                           | C <sub>34</sub> H <sub>39</sub> NO <sub>6</sub> Si            |
| Formula weight                              | 585.75                                                        |
| Temperature/K                               | 173.00(10)                                                    |
| Crystal system                              | orthorhombic                                                  |
| Space group                                 | P2 <sub>1</sub> 2 <sub>1</sub> 2 <sub>1</sub>                 |
| a/Å                                         | 9.65320(10)                                                   |
| b/Å                                         | 12.55440(10)                                                  |
| c/Å                                         | 25.5448(3)                                                    |
| α/°                                         | 90                                                            |
| β/°                                         | 90                                                            |
| γ/°                                         | 90                                                            |
| Volume/Å <sup>3</sup>                       | 3095.78(5)                                                    |
| Z                                           | 4                                                             |
| ρ <sub>calc</sub> /cm <sup>3</sup>          | 1.257                                                         |
| μ/mm <sup>-1</sup>                          | 1.040                                                         |
| F(000)                                      | 1248.0                                                        |
| Crystal size/mm <sup>3</sup>                | 0.32 × 0.29 × 0.26                                            |
| Radiation                                   | CuKα (λ = 1.54184)                                            |
| 2θ range for data collection/°              | 6.92 to 134.154                                               |
| Index ranges                                | -11 ≤ h ≤ 11, -14 ≤ k ≤ 14, -30 ≤ l ≤ 30                      |
| Reflections collected                       | 81298                                                         |
| Independent reflections                     | 5514 [R <sub>int</sub> = 0.0601, R <sub>sigma</sub> = 0.0201] |
| Data/restraints/parameters                  | 5514/0/386                                                    |
| Goodness-of-fit on F <sup>2</sup>           | 1.067                                                         |
| Final R indexes [I ≥ 2σ (I)]                | R <sub>1</sub> = 0.0282, wR <sub>2</sub> = 0.0757             |
| Final R indexes [all data]                  | R <sub>1</sub> = 0.0285, wR <sub>2</sub> = 0.0759             |
| Largest diff. peak/hole / e Å <sup>-3</sup> | 0.21/-0.21                                                    |
| Flack parameter                             | 0.023(7)                                                      |



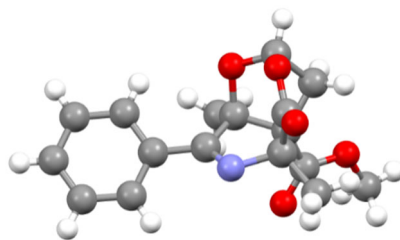**Table S12 Crystal data and structure refinement.**

|                                             |                                                               |
|---------------------------------------------|---------------------------------------------------------------|
| Identification code                         | exp_3132                                                      |
| Empirical formula                           | C <sub>17</sub> H <sub>17</sub> NO <sub>5</sub>               |
| Formula weight                              | 315.31                                                        |
| Temperature/K                               | 173.00(10)                                                    |
| Crystal system                              | monoclinic                                                    |
| Space group                                 | P2 <sub>1</sub> /n                                            |
| a/Å                                         | 7.03880(10)                                                   |
| b/Å                                         | 31.5073(3)                                                    |
| c/Å                                         | 7.15720(10)                                                   |
| α/°                                         | 90                                                            |
| β/°                                         | 103.3610(10)                                                  |
| γ/°                                         | 90                                                            |
| Volume/Å <sup>3</sup>                       | 1544.32(3)                                                    |
| Z                                           | 4                                                             |
| ρ <sub>calc</sub> /cm <sup>3</sup>          | 1.356                                                         |
| μ/mm <sup>-1</sup>                          | 0.837                                                         |
| F(000)                                      | 664.0                                                         |
| Crystal size/mm <sup>3</sup>                | 0.39 × 0.32 × 0.27                                            |
| Radiation                                   | CuKα (λ = 1.54184)                                            |
| 2θ range for data collection/°              | 11.234 to 134.118                                             |
| Index ranges                                | -8 ≤ h ≤ 8, -37 ≤ k ≤ 37, -8 ≤ l ≤ 8                          |
| Reflections collected                       | 32400                                                         |
| Independent reflections                     | 2759 [R <sub>int</sub> = 0.0478, R <sub>sigma</sub> = 0.0214] |
| Data/restraints/parameters                  | 2759/0/211                                                    |
| Goodness-of-fit on F <sup>2</sup>           | 1.045                                                         |
| Final R indexes [I ≥ 2σ (I)]                | R <sub>1</sub> = 0.0342, wR <sub>2</sub> = 0.0809             |
| Final R indexes [all data]                  | R <sub>1</sub> = 0.0360, wR <sub>2</sub> = 0.0820             |
| Largest diff. peak/hole / e Å <sup>-3</sup> | 0.25/-0.21                                                    |

8.34  
8.07  
8.05  
7.83  
7.81

4.20  
4.18  
4.17  
4.15  
3.90  
3.73

1.53  
1.51

| Parameter                | Value               |
|--------------------------|---------------------|
| 1 Title                  | c-2-98-ap.1.fid     |
| 2 Origin                 | Bruker BioSpin GmbH |
| 3 Solvent                | CDCl3               |
| 4 Temperature            | 297.9               |
| 5 Number of Scans        | 4                   |
| 6 Relaxation Delay       | 5.0000              |
| 7 Acquisition Date       | 2022-10-05T19:54:07 |
| 8 Spectrometer Frequency | 400.13              |

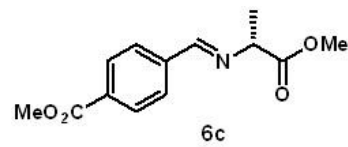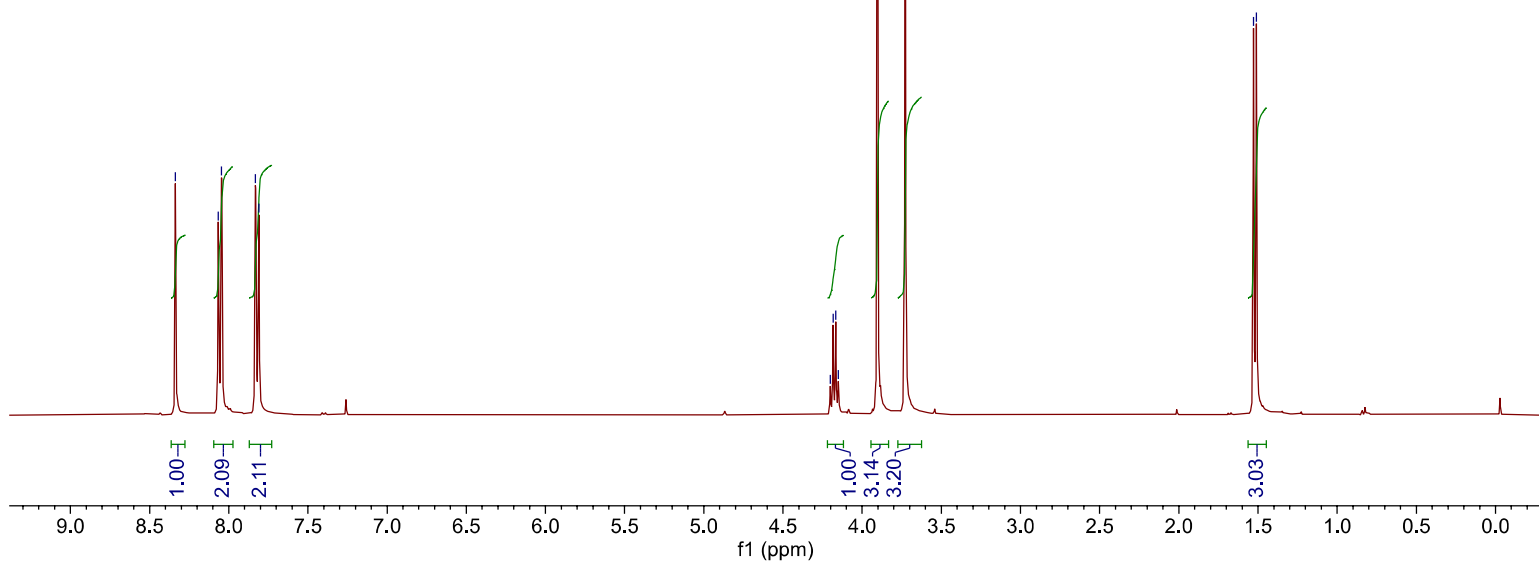

172.59  
166.46  
161.92

139.46  
132.14  
129.74  
128.29

67.92

52.19

19.30

| Parameter                | Value               |
|--------------------------|---------------------|
| 1 Title                  | c-2-98-ap-C.1.fid   |
| 2 Origin                 | Bruker BioSpin GmbH |
| 3 Solvent                | CDCl3               |
| 4 Temperature            | 298.4               |
| 5 Number of Scans        | 300                 |
| 6 Relaxation Delay       | 1.0000              |
| 7 Acquisition Date       | 2022-10-05T20:06:50 |
| 8 Spectrometer Frequency | 100.62              |

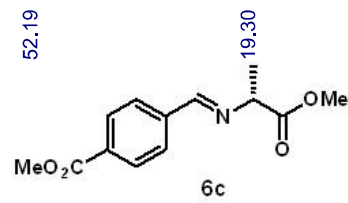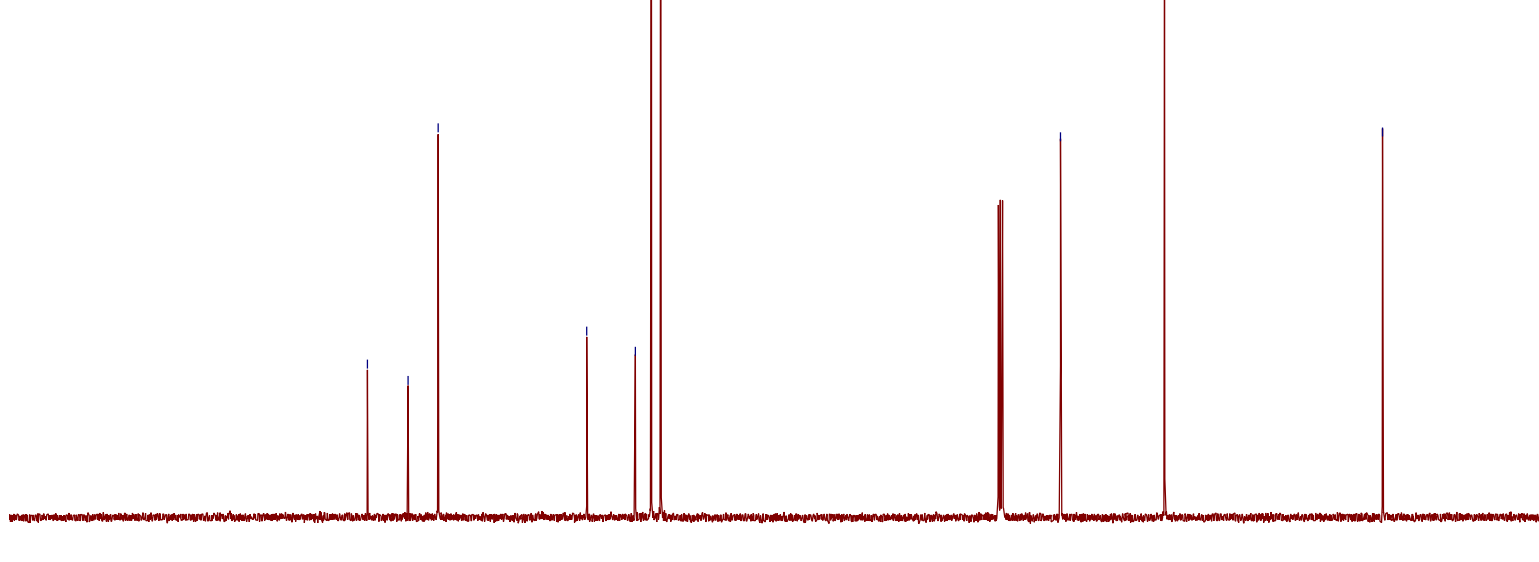

5.49  
5.49

4.87  
4.86

3.77

1.01  
0.99  
0.97  
0.75  
0.73  
0.71  
0.69

| Parameter                | Value               |
|--------------------------|---------------------|
| 1 Title                  | LLC-2-36-AP.1.fid   |
| 2 Origin                 | Bruker BioSpin GmbH |
| 3 Solvent                | CDCl3               |
| 4 Temperature            | 297.2               |
| 5 Number of Scans        | 4                   |
| 6 Relaxation Delay       | 5.0000              |
| 7 Acquisition Date       | 2022-10-07T05:11:09 |
| 8 Spectrometer Frequency | 400.13              |

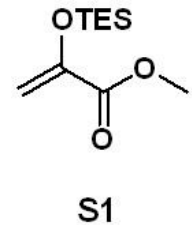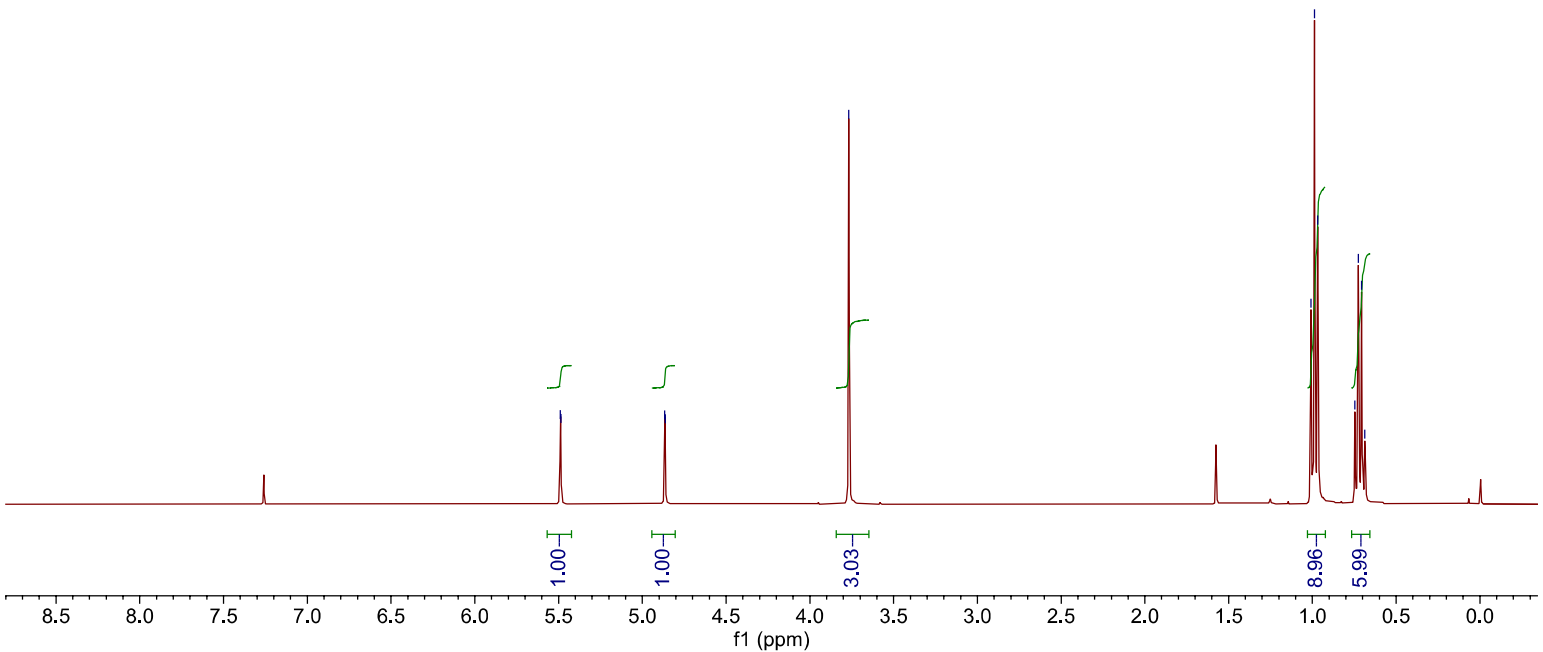

164.93

147.27

103.47

52.13

6.50  
4.71

| Parameter                | Value               |
|--------------------------|---------------------|
| 1 Title                  | llc-2-36-ap-C.1.fid |
| 2 Origin                 | Bruker BioSpin GmbH |
| 3 Solvent                | CDCl3               |
| 4 Temperature            | 297.7               |
| 5 Number of Scans        | 1000                |
| 6 Relaxation Delay       | 1.0000              |
| 7 Acquisition Date       | 2022-10-20T10:59:34 |
| 8 Spectrometer Frequency | 100.62              |

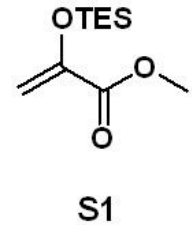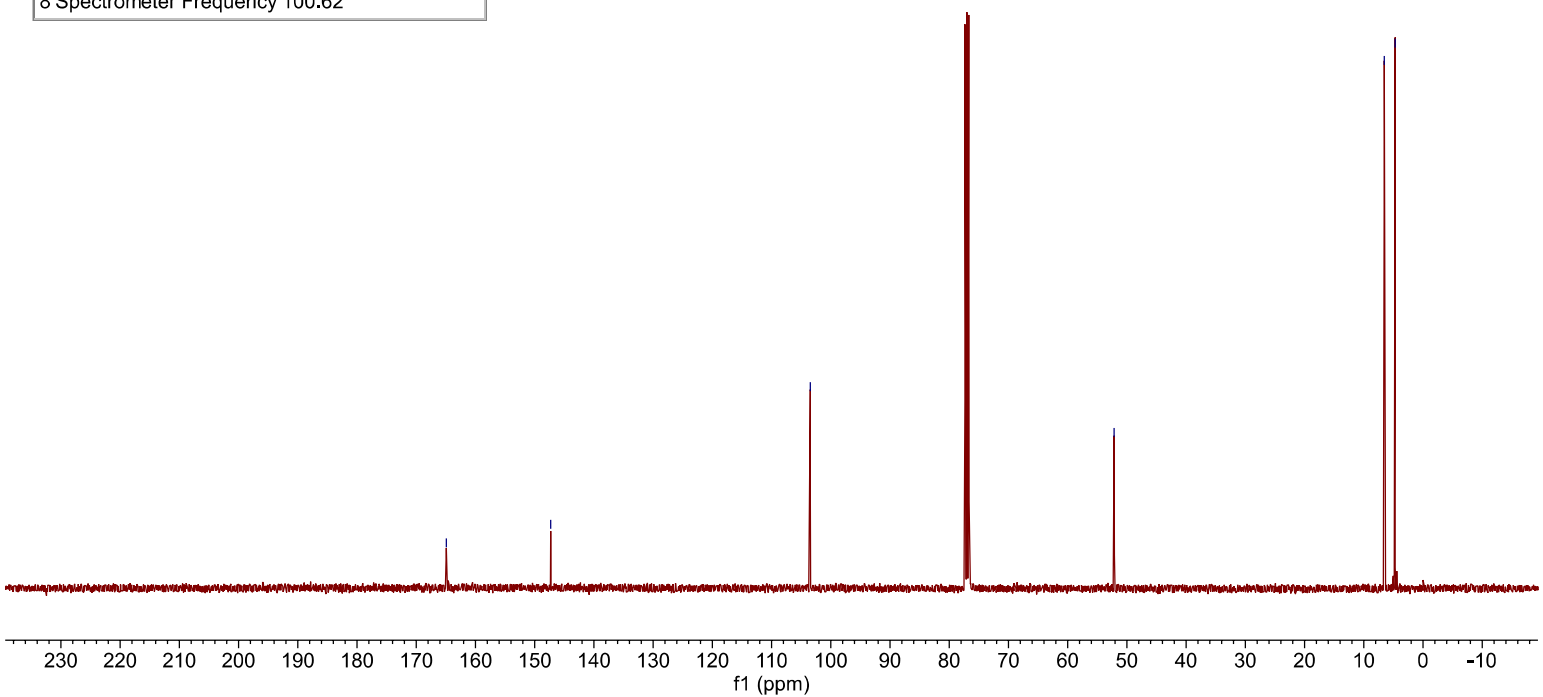

| Parameter                | Value               |
|--------------------------|---------------------|
| 1 Title                  | c-2-21-ap-H.1.fid   |
| 2 Origin                 | Bruker BioSpin GmbH |
| 3 Solvent                | CDCl3               |
| 4 Temperature            | 300.2               |
| 5 Number of Scans        | 4                   |
| 6 Relaxation Delay       | 5.0000              |
| 7 Acquisition Date       | 2022-08-25T03:57:20 |
| 8 Spectrometer Frequency | 400.13              |

7.32  
7.30  
7.29  
7.28  
7.27  
7.26  
7.24  
7.24  
7.24  
7.23  
7.22  
7.21  
7.21  
7.20

3.89  
3.73  
3.41  
3.40  
3.40

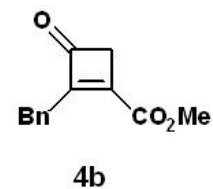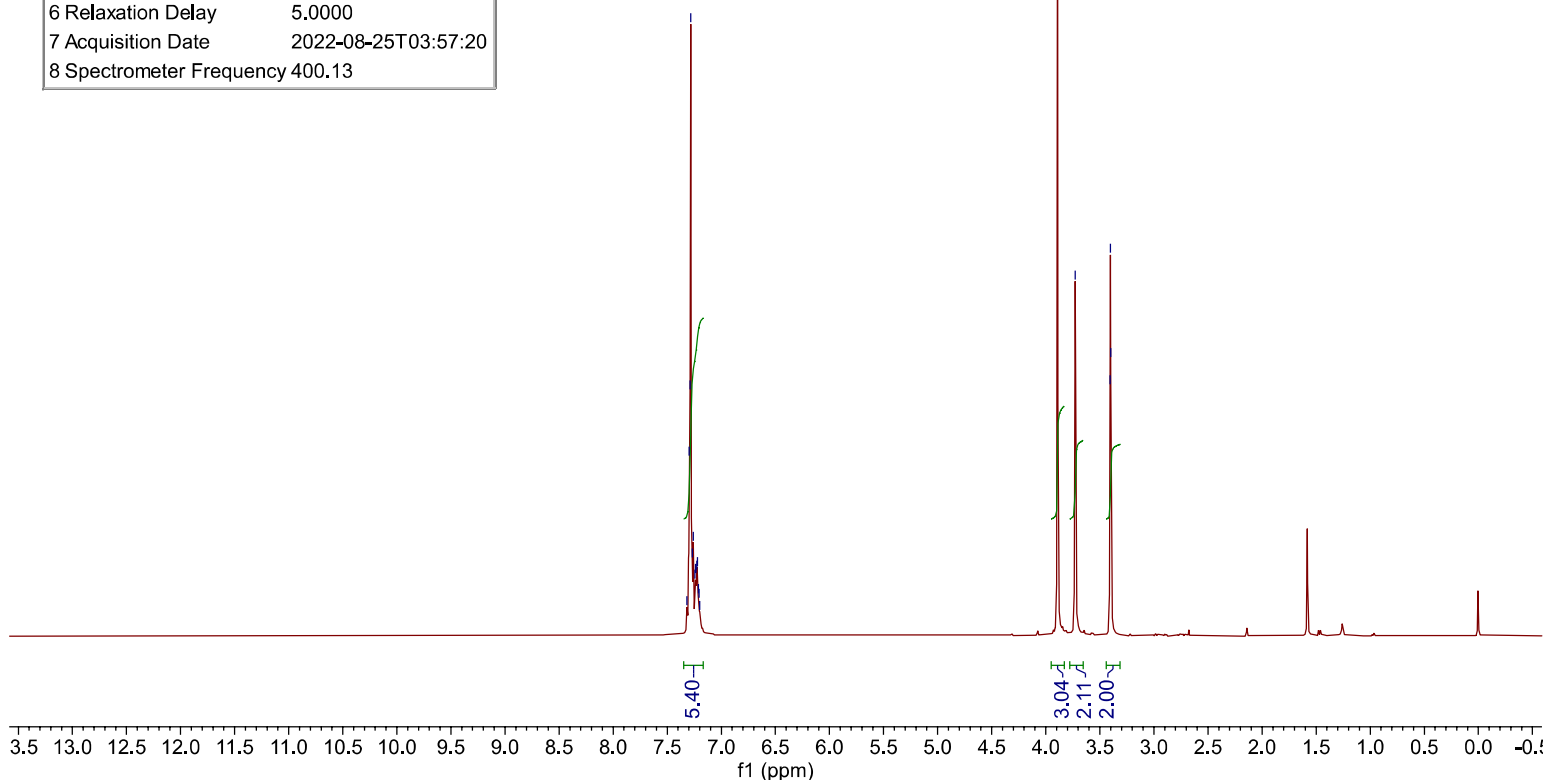

189.85

163.10  
157.31  
151.82

135.86  
128.90  
128.74  
126.81

52.33  
48.85

31.01

| Parameter                | Value               |
|--------------------------|---------------------|
| 1 Title                  | c-2-21-ap-C.1.fid   |
| 2 Origin                 | Bruker BioSpin GmbH |
| 3 Solvent                | CDCl3               |
| 4 Temperature            | 300.7               |
| 5 Number of Scans        | 400                 |
| 6 Relaxation Delay       | 1.0000              |
| 7 Acquisition Date       | 2022-08-25T04:13:38 |
| 8 Spectrometer Frequency | 100.62              |

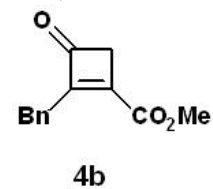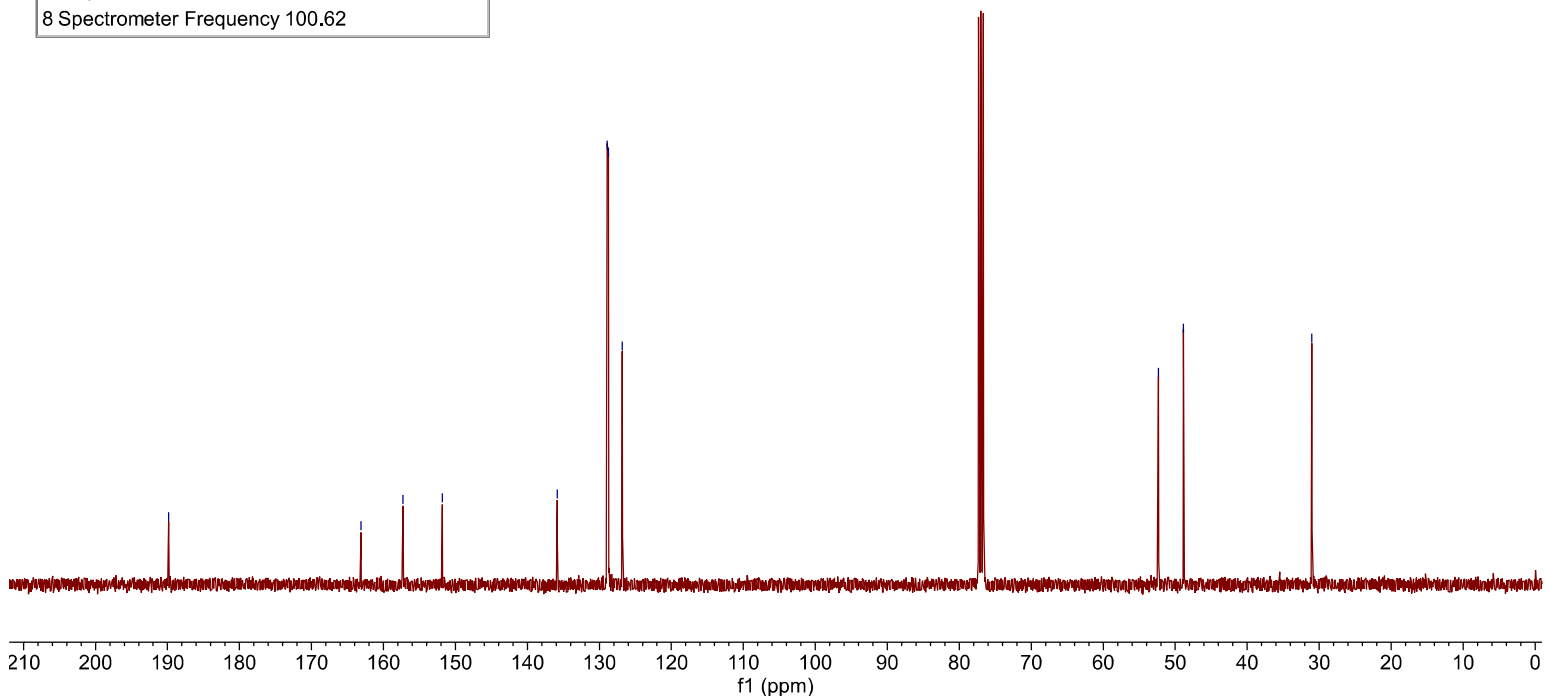

| Parameter                | Value               |
|--------------------------|---------------------|
| 1 Title                  | llc-2-73-ap2.1.fid  |
| 2 Origin                 | Bruker BioSpin GmbH |
| 3 Solvent                | CDCl3               |
| 4 Temperature            | 297.4               |
| 5 Number of Scans        | 4                   |
| 6 Relaxation Delay       | 5.0000              |
| 7 Acquisition Date       | 2022-10-06T19:20:50 |
| 8 Spectrometer Frequency | 400.13              |

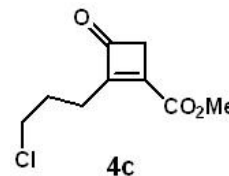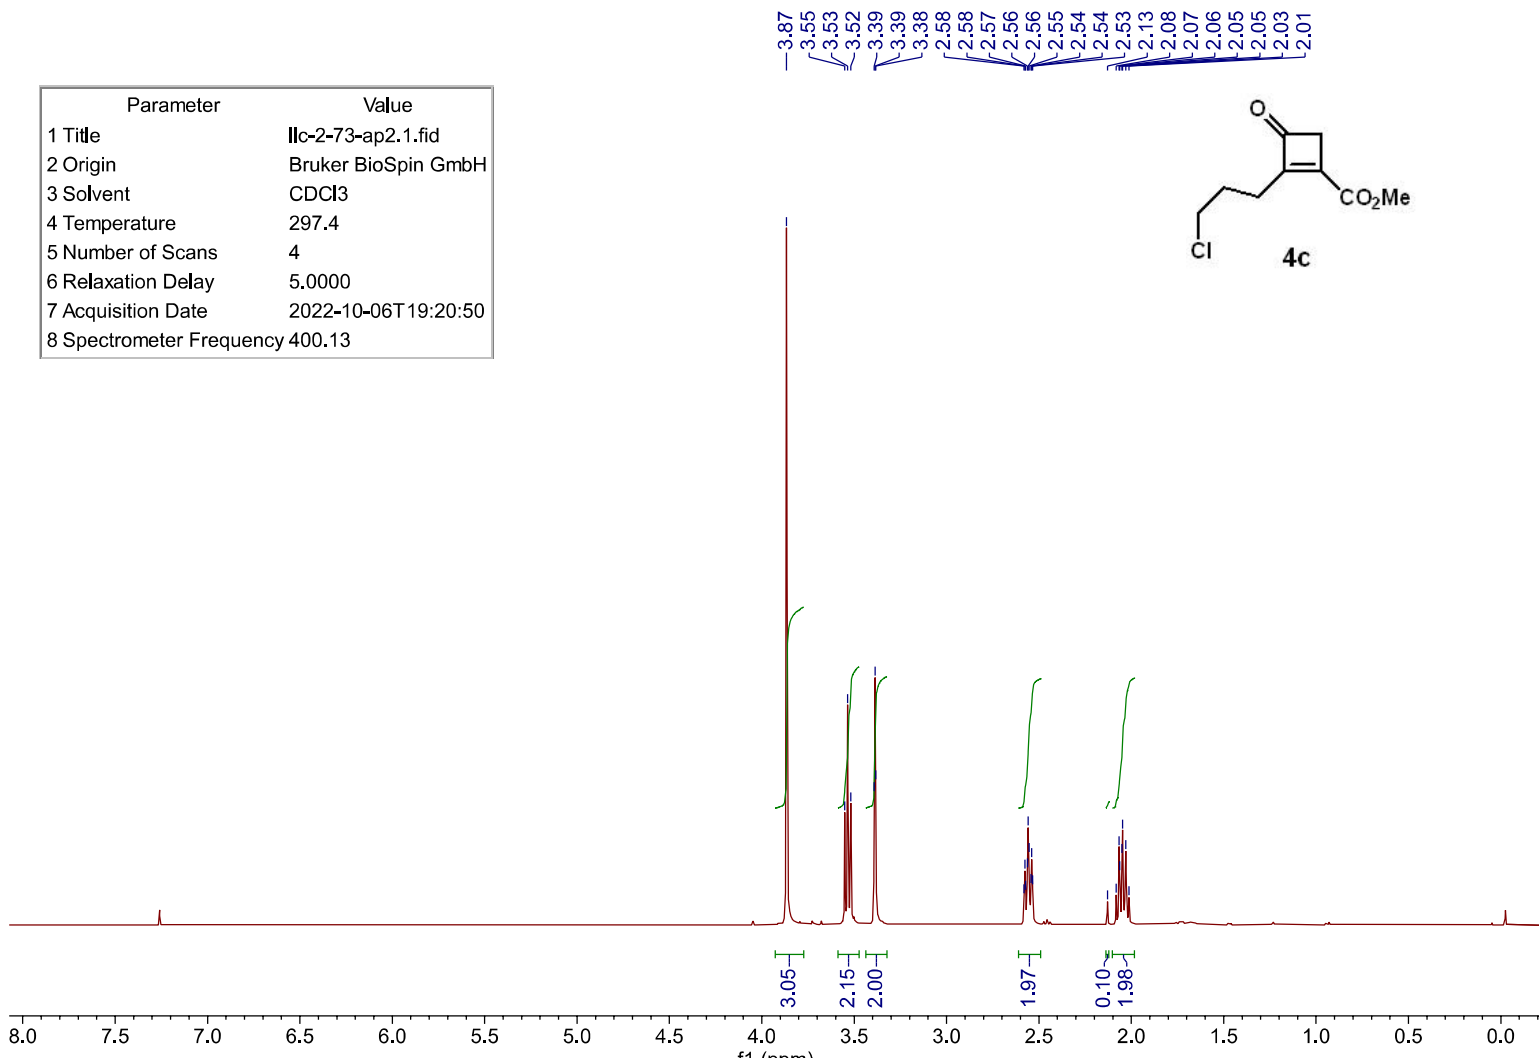

| Parameter                | Value                |
|--------------------------|----------------------|
| 1 Title                  | llc-2-73-ap3-C.1.fid |
| 2 Origin                 | Bruker BioSpin GmbH  |
| 3 Solvent                | CDCl3                |
| 4 Temperature            | 297.7                |
| 5 Number of Scans        | 300                  |
| 6 Relaxation Delay       | 1.0000               |
| 7 Acquisition Date       | 2022-10-07T05:06:01  |
| 8 Spectrometer Frequency | 100.62               |

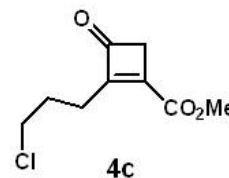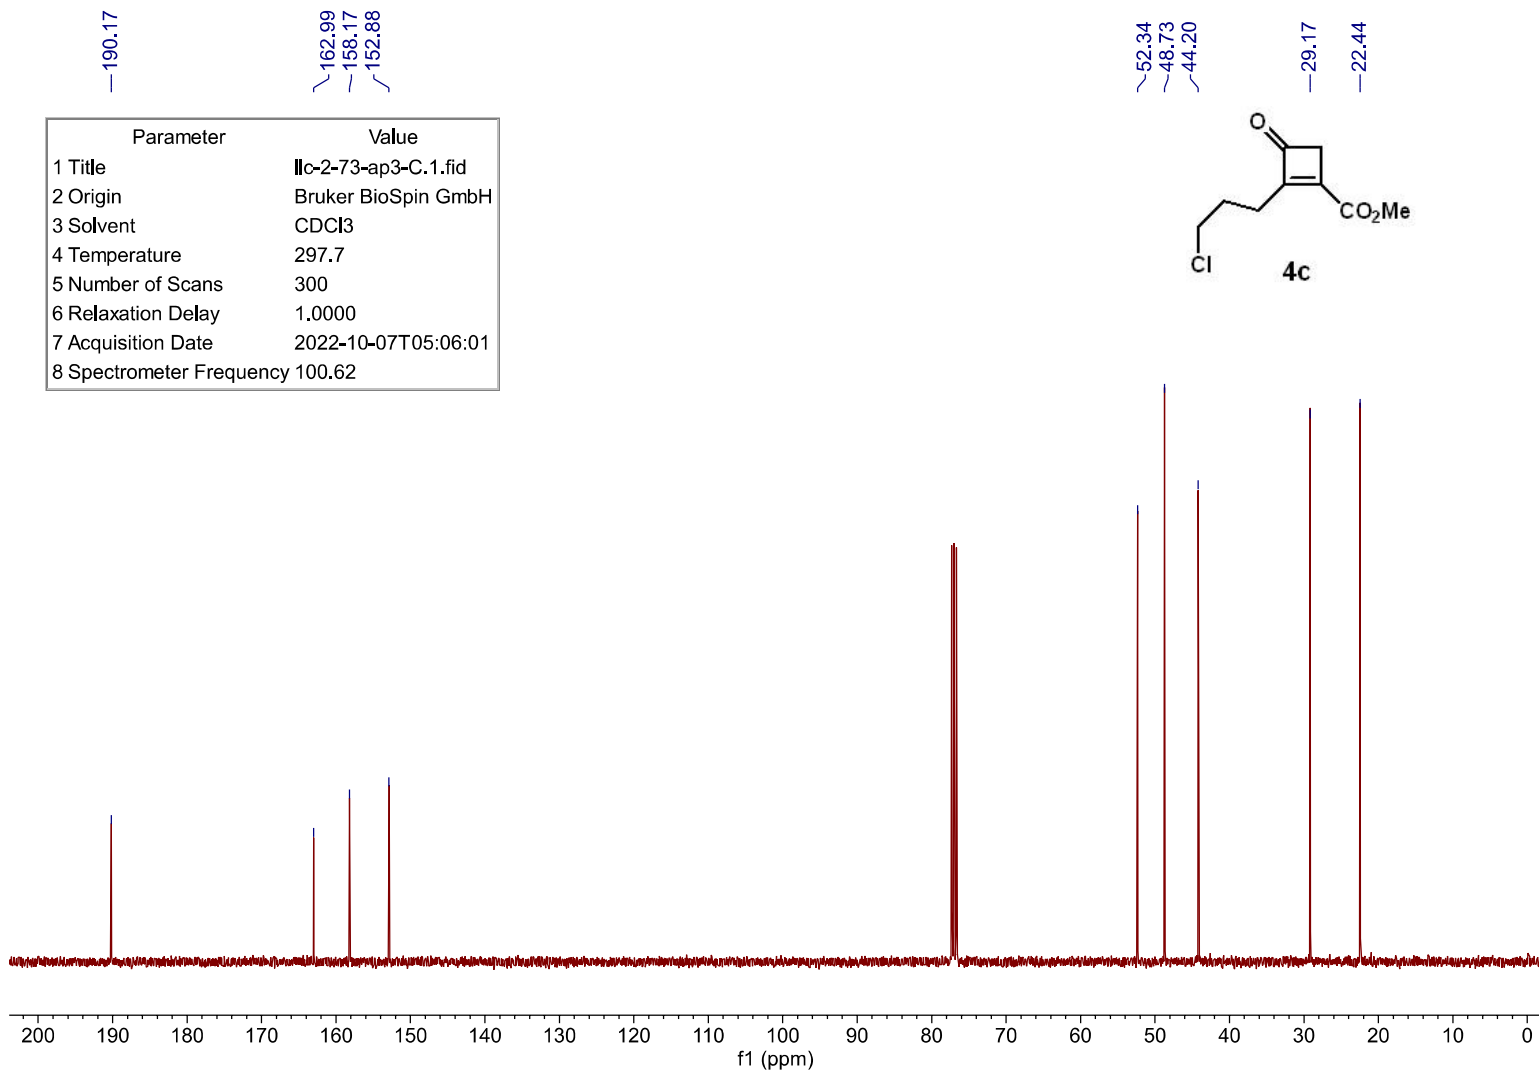

| Parameter                | Value               |
|--------------------------|---------------------|
| 1 Title                  | LLC-4-79-ap         |
| 2 Origin                 | Varian              |
| 3 Solvent                | cdcl3               |
| 4 Temperature            | 25.0                |
| 5 Number of Scans        | 4                   |
| 6 Relaxation Delay       | 5.0000              |
| 7 Acquisition Date       | 2023-05-11T22:59:01 |
| 8 Spectrometer Frequency | 399.89              |

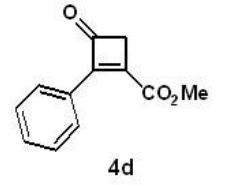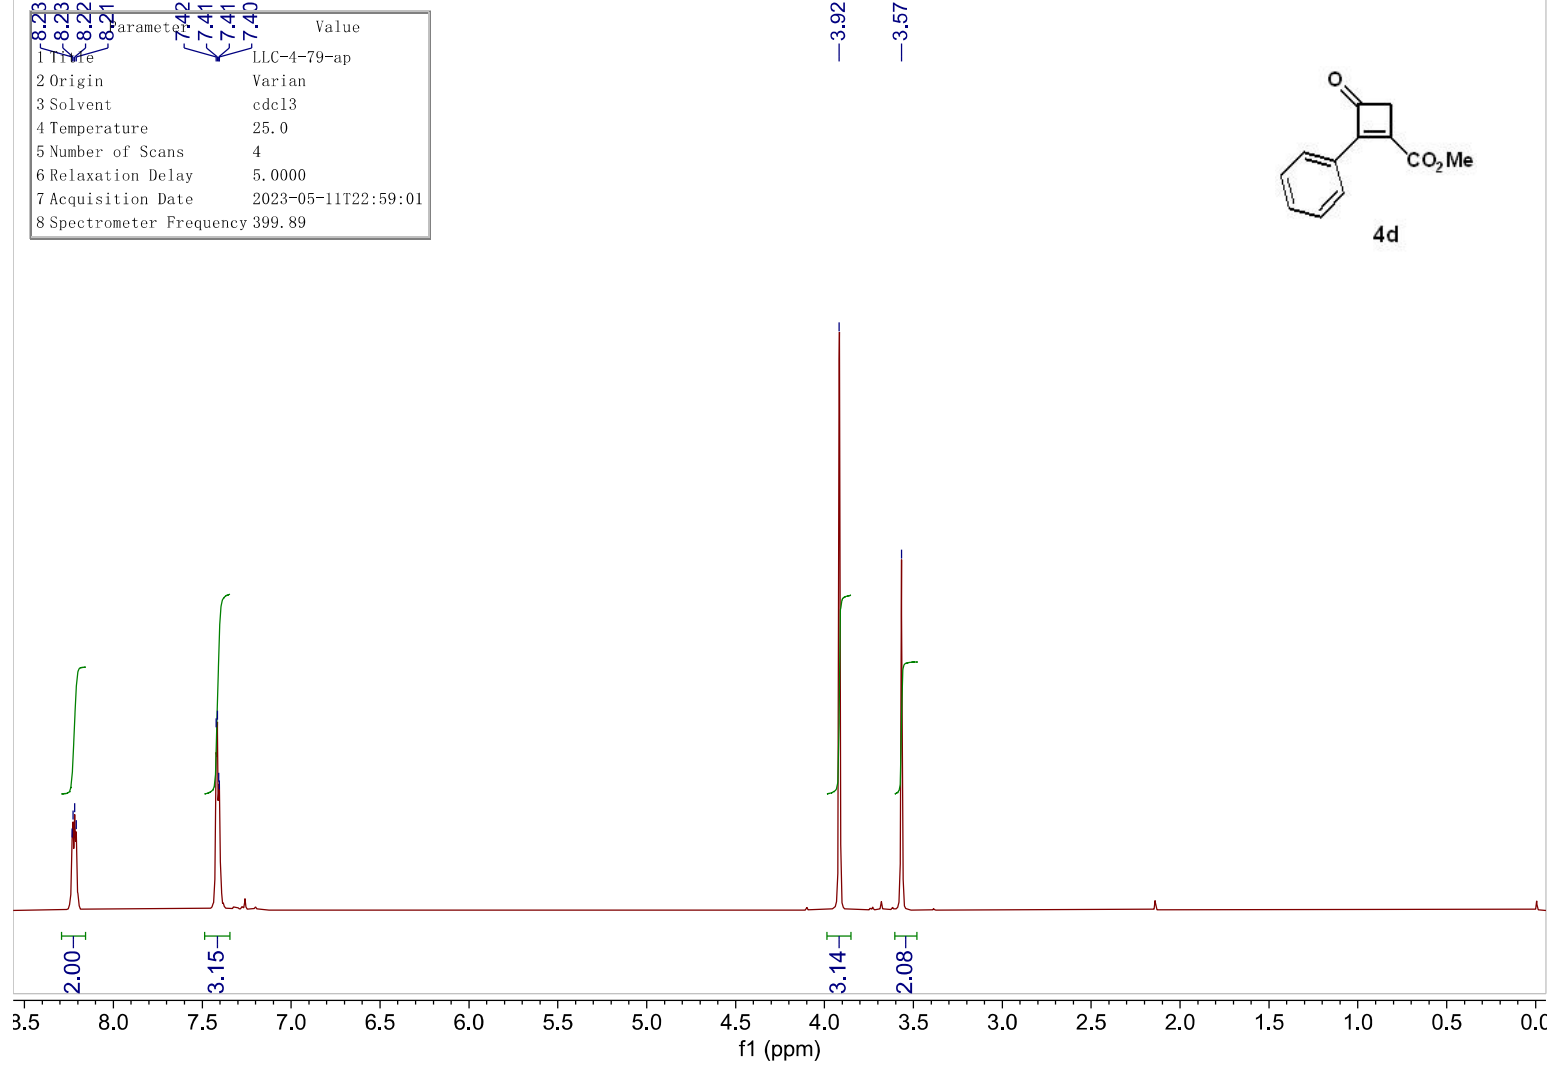

| Parameter                | Value               |
|--------------------------|---------------------|
| 1 Title                  | LLC-4-79-ap         |
| 2 Origin                 | Varian              |
| 3 Solvent                | cdcl3               |
| 4 Temperature            | 25.0                |
| 5 Number of Scans        | 512                 |
| 6 Relaxation Delay       | 1.0000              |
| 7 Acquisition Date       | 2023-05-11T23:03:52 |
| 8 Spectrometer Frequency | 100.56              |

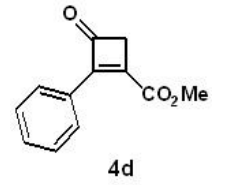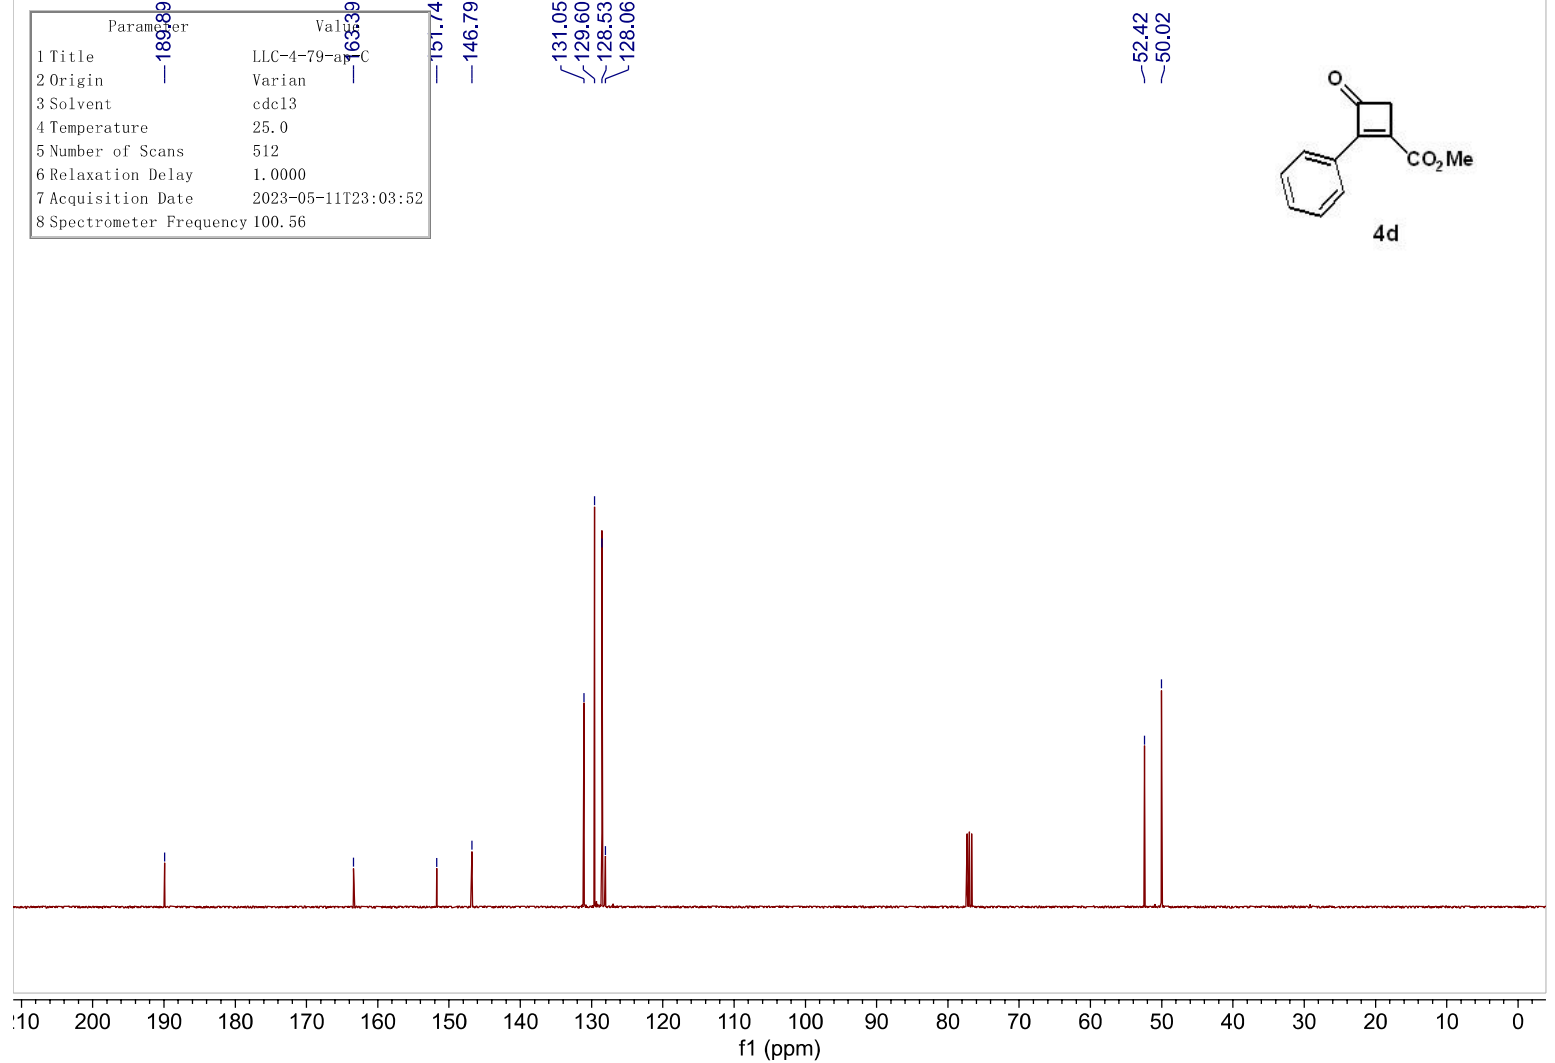

8.33  
8.32  
8.31  
7.68  
7.67  
7.67  
7.66  
7.65  
7.64  
7.63  
7.63  
7.62  
7.61  
7.61  
7.48  
7.48  
7.47  
7.46  
7.46  
7.45  
7.44  
7.40  
7.40  
7.40  
7.39  
7.38  
7.37  
7.36  
3.95  
3.95  
3.61

| Parameter                | Value                 |
|--------------------------|-----------------------|
| 1 Title                  | llc-1-142-2-b-H.1.fid |
| 2 Origin                 | Bruker BioSpin GmbH   |
| 3 Solvent                | CDCl3                 |
| 4 Temperature            | 298.9                 |
| 5 Number of Scans        | 4                     |
| 6 Relaxation Delay       | 5.0000                |
| 7 Acquisition Date       | 2022-07-12T13:03:41   |
| 8 Spectrometer Frequency | 400.13                |

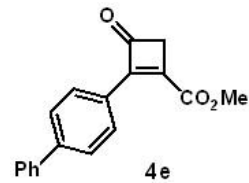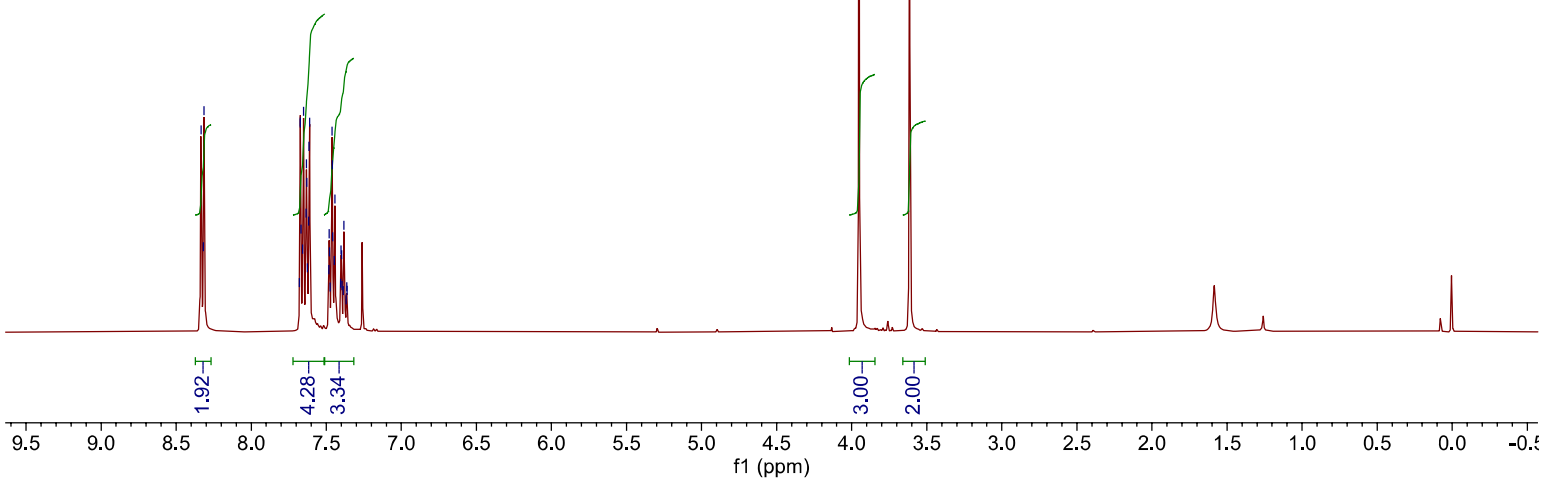

190.06  
163.56  
151.57  
146.42  
143.70  
140.11  
130.19  
128.90  
128.00  
127.22  
127.14  
127.01  
52.48  
50.18

| Parameter                | Value                 |
|--------------------------|-----------------------|
| 1 Title                  | llc-1-142-2-b-C.1.fid |
| 2 Origin                 | Bruker BioSpin GmbH   |
| 3 Solvent                | CDCl3                 |
| 4 Temperature            | 299.4                 |
| 5 Number of Scans        | 300                   |
| 6 Relaxation Delay       | 2.0000                |
| 7 Acquisition Date       | 2022-07-12T13:21:12   |
| 8 Spectrometer Frequency | 100.62                |

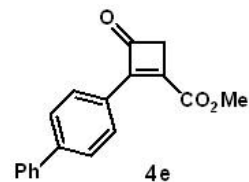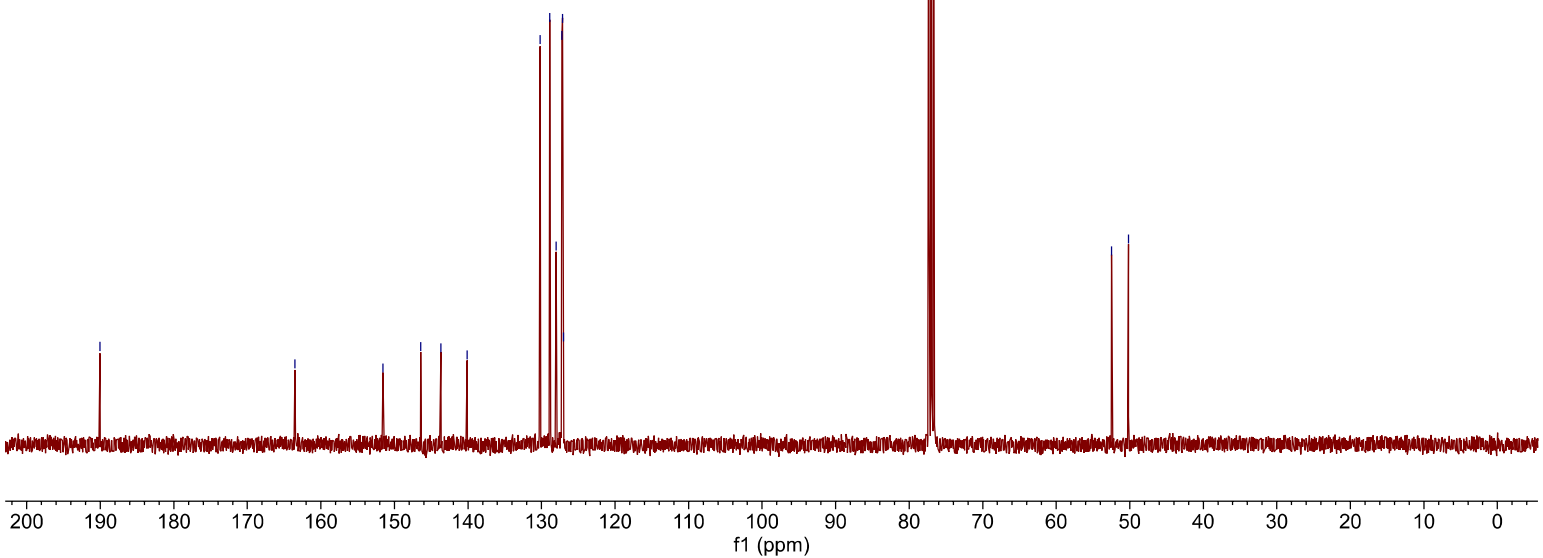

7.26

4.66

3.97

3.80

3.80

3.72

3.64

3.60

3.01

2.96

1.09

| Parameter                | Value               |
|--------------------------|---------------------|
| 1 Title                  | LLC-1-30-AC.1.fid   |
| 2 Origin                 | Bruker BioSpin GmbH |
| 3 Solvent                | CDCl3               |
| 4 Temperature            | 301.5               |
| 5 Number of Scans        | 4                   |
| 6 Relaxation Delay       | 5.0000              |
| 7 Acquisition Date       | 2021-07-29T22:09:27 |
| 8 Spectrometer Frequency | 400.13              |

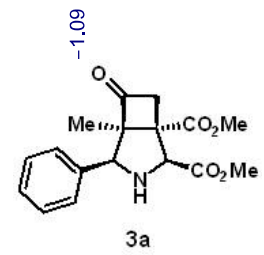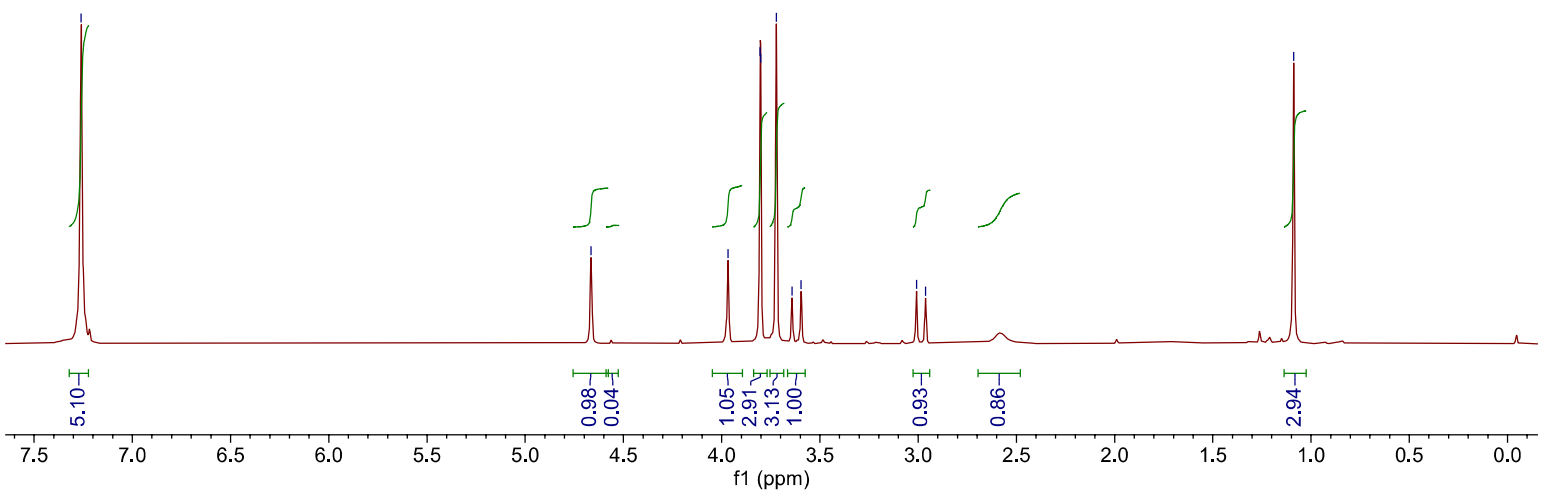

207.04

171.27

170.42

136.02

128.43

128.18

127.43

79.23

70.93

64.53

52.52

52.30

50.70

49.29

13.21

| Parameter                | Value                 |
|--------------------------|-----------------------|
| 1 Title                  | llc-1-30-carbon.1.fid |
| 2 Origin                 | Bruker BioSpin GmbH   |
| 3 Solvent                | CDCl3                 |
| 4 Temperature            | 302.0                 |
| 5 Number of Scans        | 300                   |
| 6 Relaxation Delay       | 1.0000                |
| 7 Acquisition Date       | 2021-07-30T00:31:28   |
| 8 Spectrometer Frequency | 100.62                |

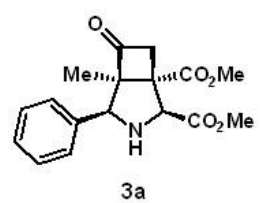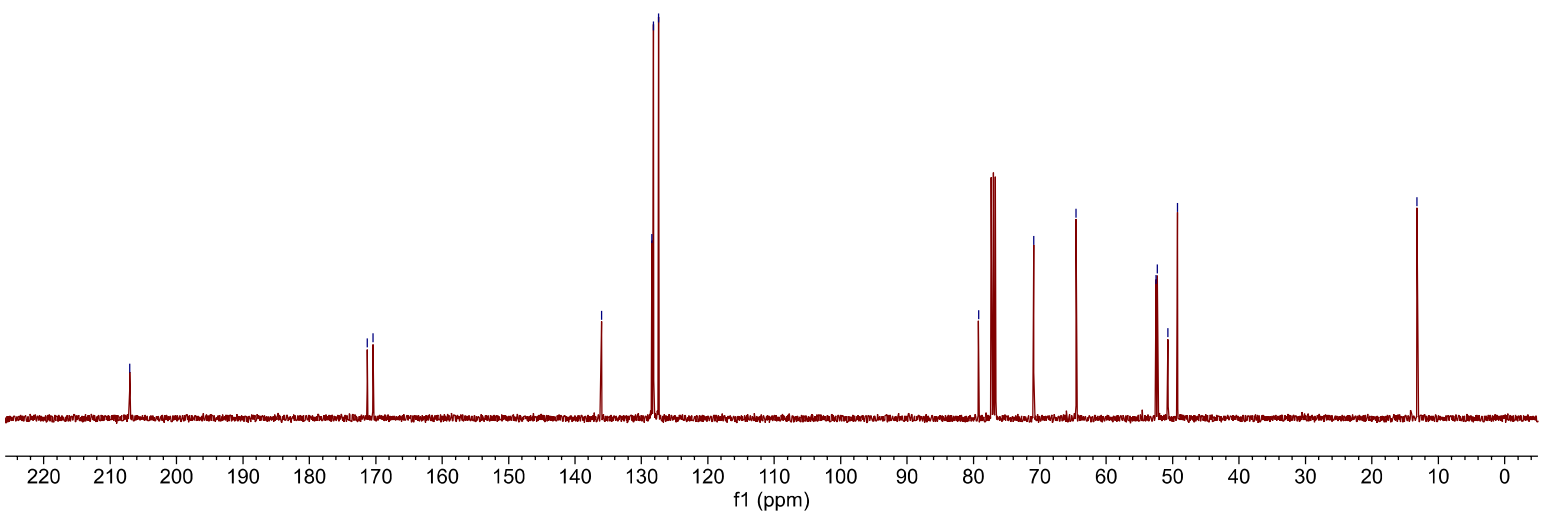



7.57  
7.55  
7.43  
7.41

4.72

4.06  
3.85  
3.76  
3.71  
3.67

3.03  
2.98  
2.66

1.13

| Parameter          | Value               |
|--------------------|---------------------|
| 1 Title            | LLC-1-89.1.fid      |
| 2 Origin           | Bruker BioSpin GmbH |
| 3 Solvent          | CDCl3               |
| 4 Temperature      | 296.3               |
| 5 Number of Scans  | 4                   |
| 6 Relaxation Delay | 5.0000              |
| 7 Acquisition Date | 2021-11-27T22:37:27 |
| 8 Spectrometer     | 400.13              |
| Frequency          |                     |

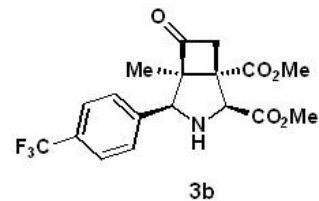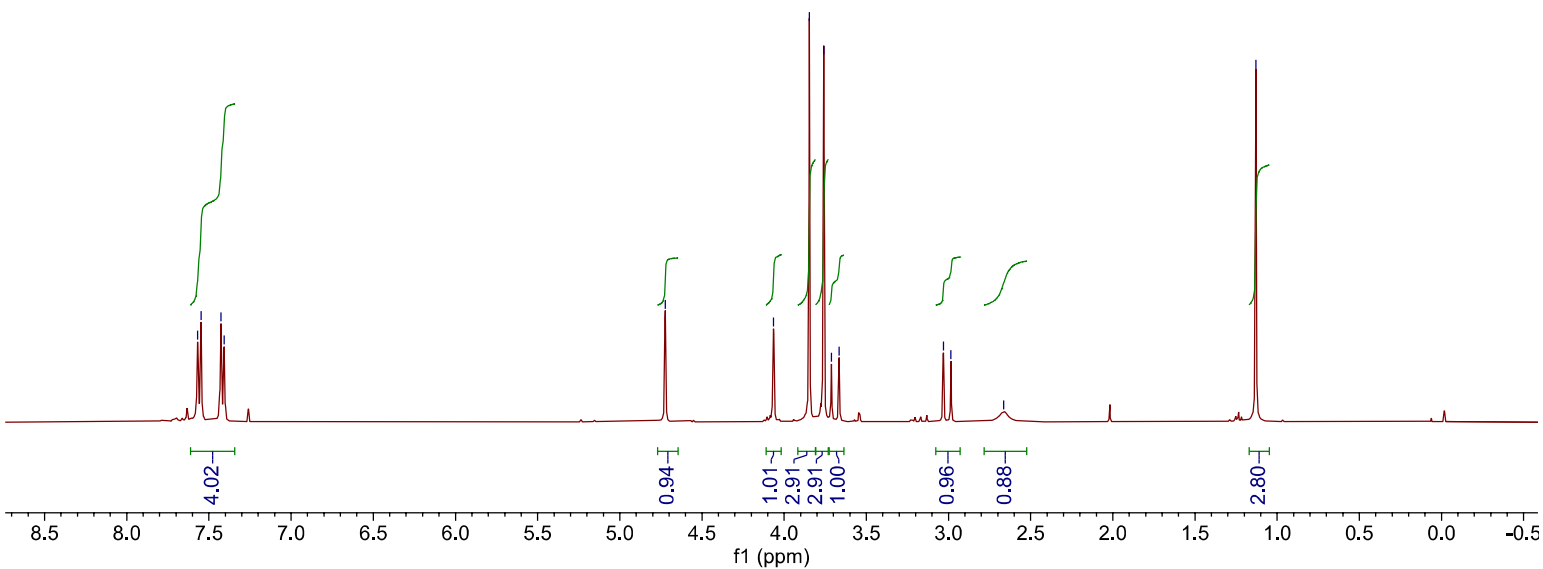

206.83

171.03  
170.20

140.20  
130.96  
130.64  
130.31  
130.31  
129.99  
127.82  
125.34  
125.18  
125.14  
125.11  
125.07  
122.63

78.71

70.11

64.51

52.66

52.40

50.46

49.42

13.00

| Parameter          | Value                 |
|--------------------|-----------------------|
| 1 Title            | llc-1-89-carbon.1.fid |
| 2 Origin           | Bruker BioSpin GmbH   |
| 3 Solvent          | CDCl3                 |
| 4 Temperature      | 296.9                 |
| 5 Number of Scans  | 300                   |
| 6 Relaxation Delay | 1.0000                |
| 7 Acquisition Date | 2021-11-27T23:46:35   |
| 8 Spectrometer     | Frequency 100.62      |

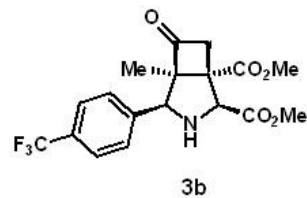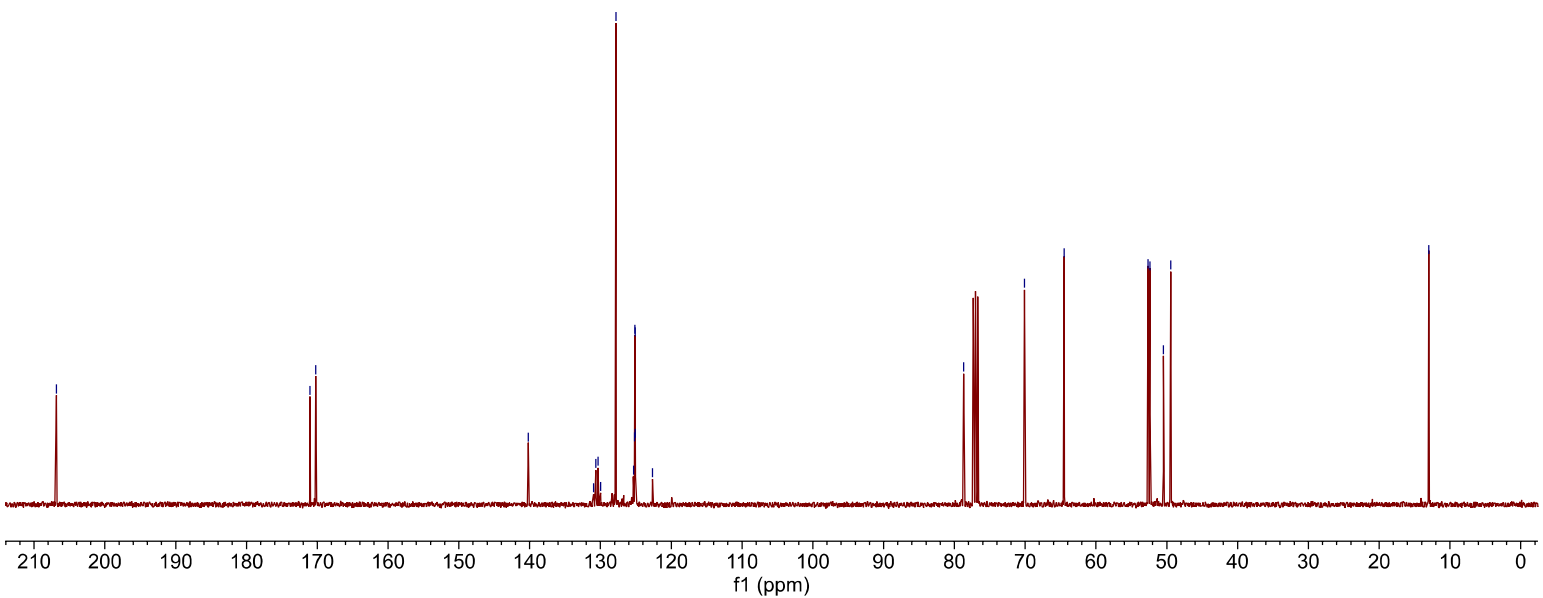

| Parameter                | Value               |
|--------------------------|---------------------|
| 1 Title                  | llc-1-90-n-F.1.fid  |
| 2 Origin                 | Bruker BioSpin GmbH |
| 3 Solvent                | CDCl3               |
| 4 Temperature            | 296.4               |
| 5 Number of Scans        | 16                  |
| 6 Relaxation Delay       | 1.0000              |
| 7 Acquisition Date       | 2021-11-30T20:53:06 |
| 8 Spectrometer Frequency | 376.46              |

—62.54

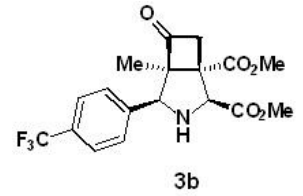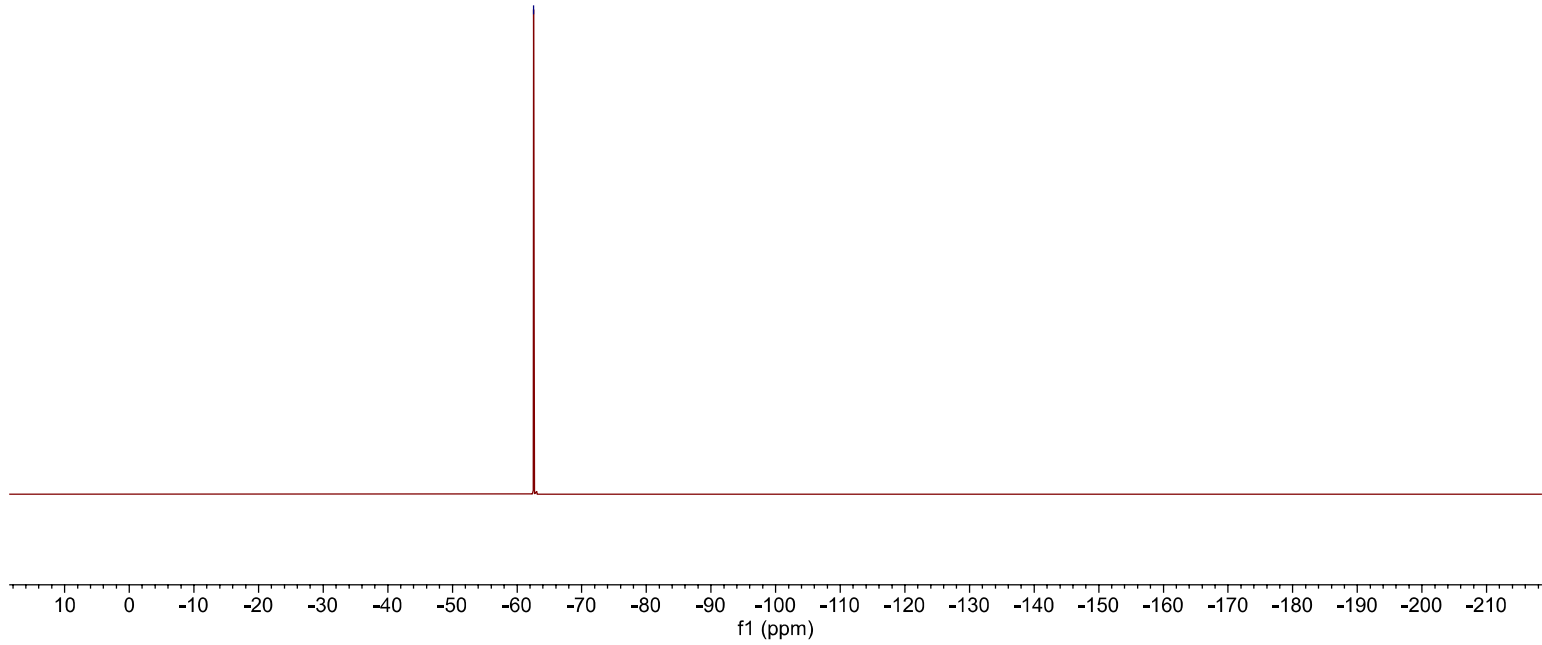

| Parameter                | Value               |
|--------------------------|---------------------|
| 1 Title                  | llc-2-57-ap-H.3.fid |
| 2 Origin                 | Bruker BioSpin GmbH |
| 3 Solvent                | CDCl3               |
| 4 Temperature            | 300,0               |
| 5 Number of Scans        | 4                   |
| 6 Relaxation Delay       | 5.0000              |
| 7 Acquisition Date       | 2022-09-10T07:58:13 |
| 8 Spectrometer Frequency | 400.13              |

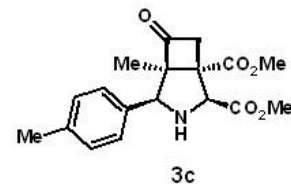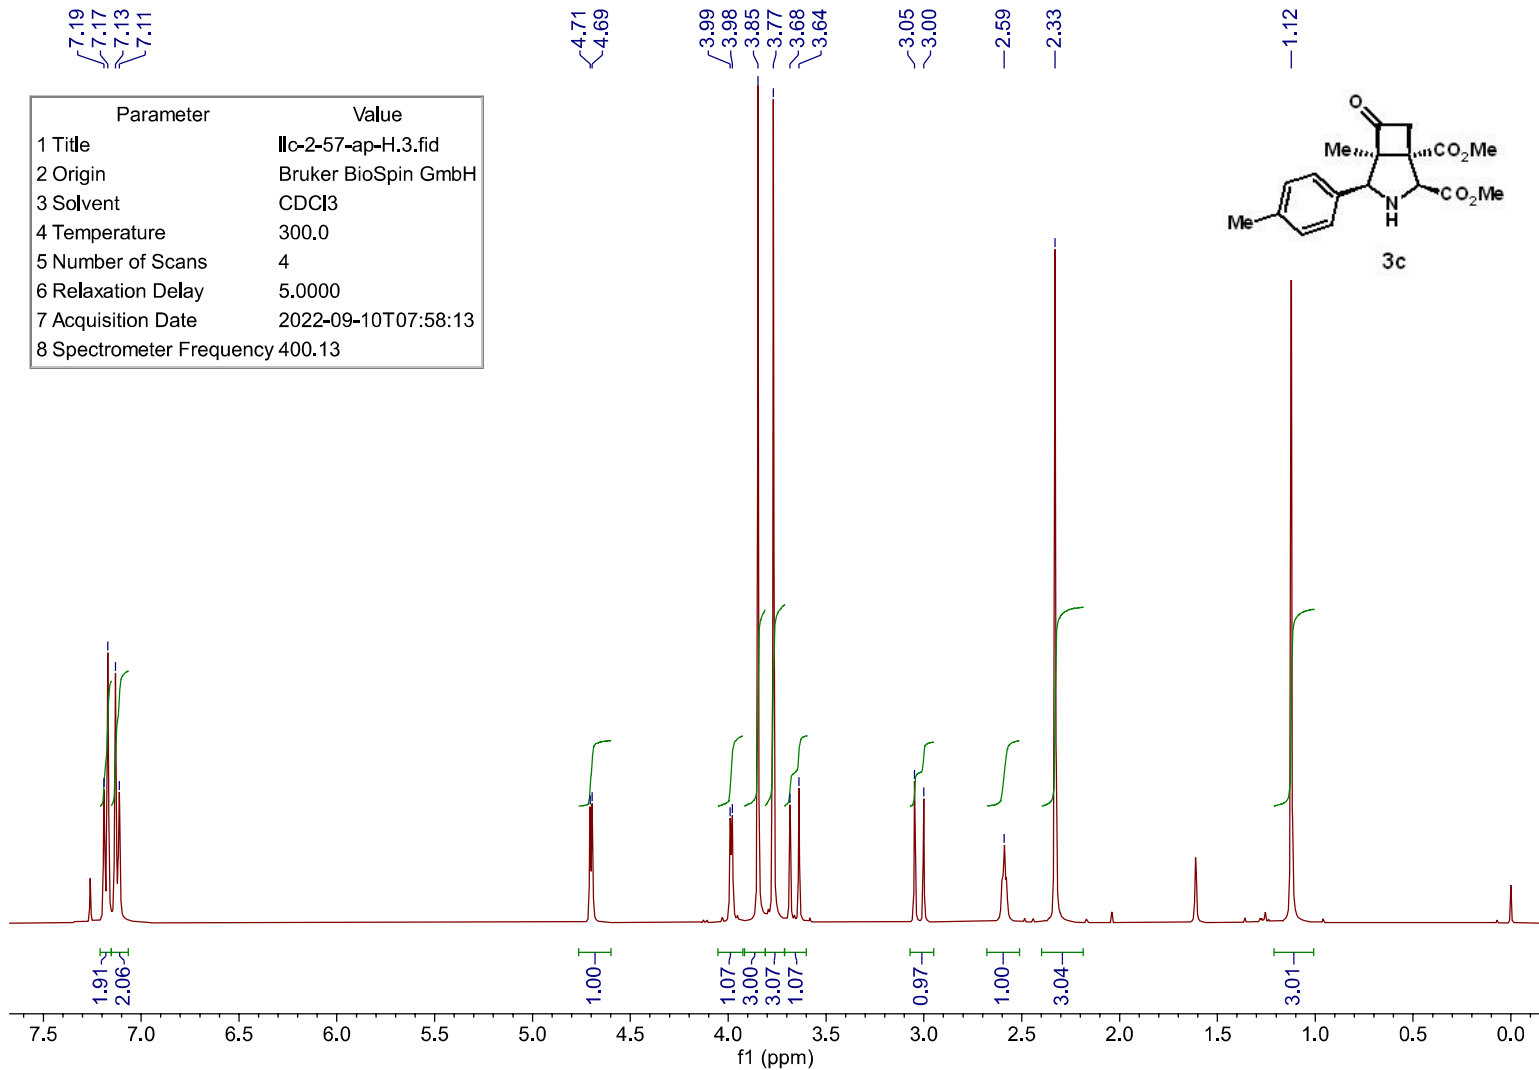

| Parameter                | Value               |
|--------------------------|---------------------|
| 1 Title                  | llc-2-57-ap-C.3.fid |
| 2 Origin                 | Bruker BioSpin GmbH |
| 3 Solvent                | CDCl3               |
| 4 Temperature            | 300,5               |
| 5 Number of Scans        | 400                 |
| 6 Relaxation Delay       | 1.0000              |
| 7 Acquisition Date       | 2022-09-10T08:14:28 |
| 8 Spectrometer Frequency | 100.62              |

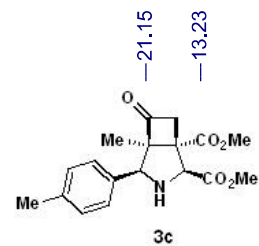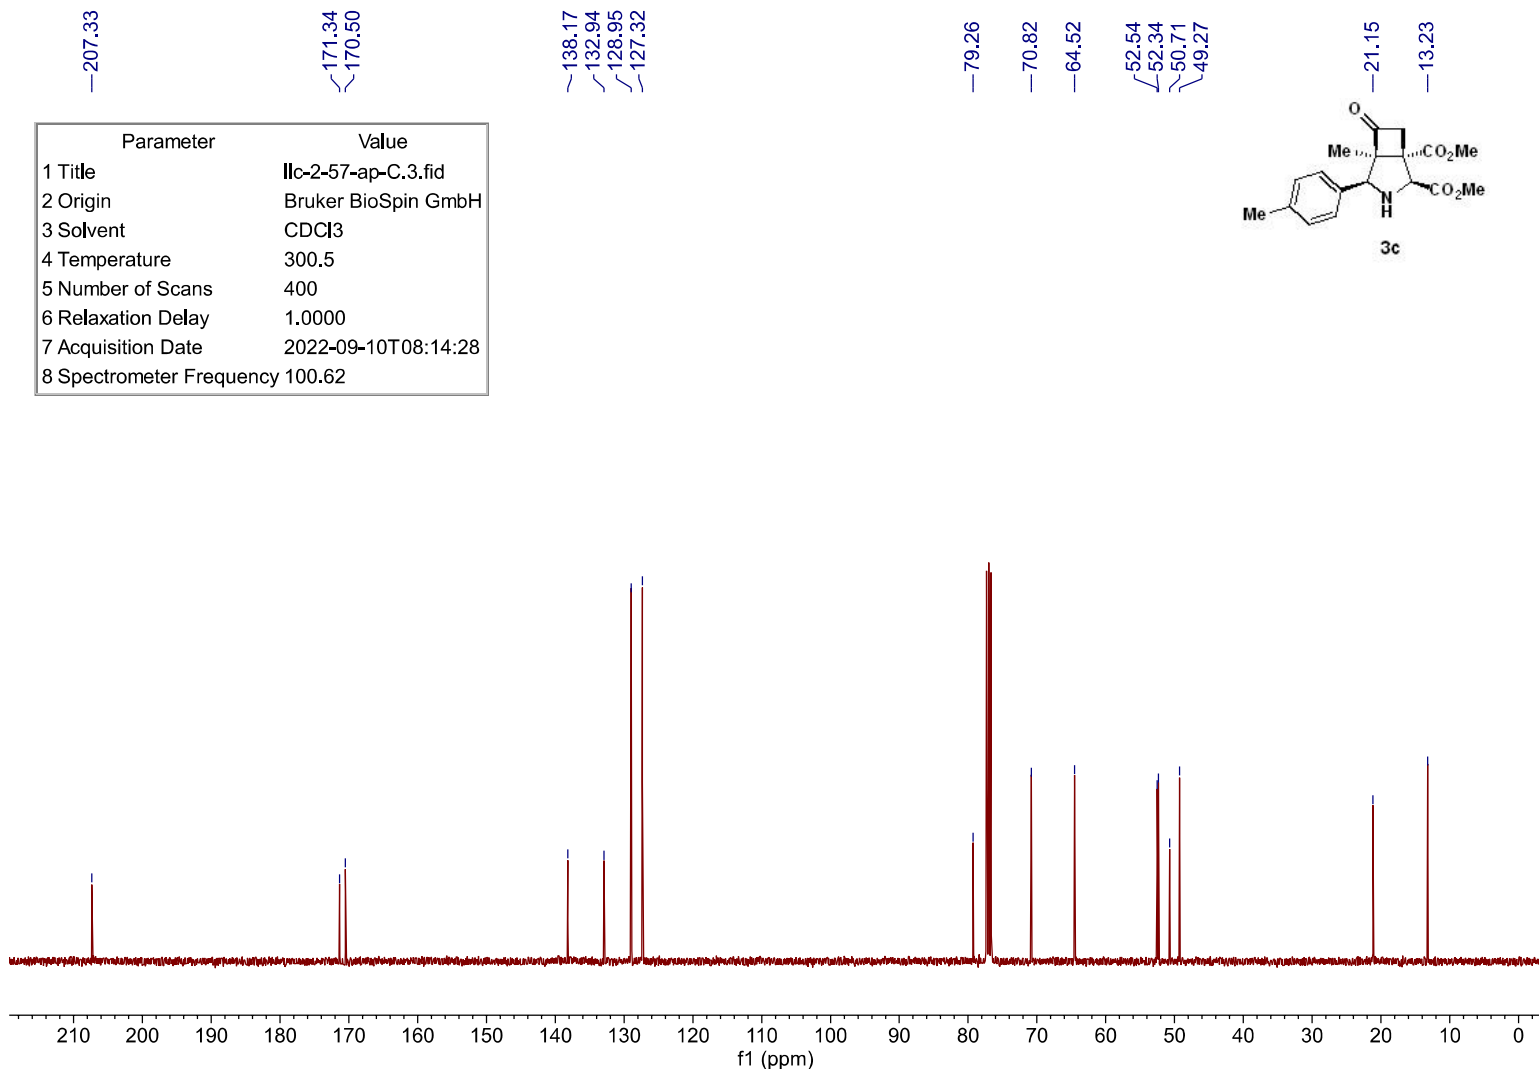

7.22  
7.20  
7.18  
7.12  
7.10  
7.08

4.71  
4.70

3.98  
3.97  
3.85  
3.77  
3.68  
3.64

3.06  
3.01

2.60

2.33

1.13

| Parameter                | Value               |
|--------------------------|---------------------|
| 1 Title                  | c-2-54-ap-H.1.fid   |
| 2 Origin                 | Bruker BioSpin GmbH |
| 3 Solvent                | CDCl3               |
| 4 Temperature            | 300.0               |
| 5 Number of Scans        | 4                   |
| 6 Relaxation Delay       | 5.0000              |
| 7 Acquisition Date       | 2022-09-06T01:33:20 |
| 8 Spectrometer Frequency | 400.13              |

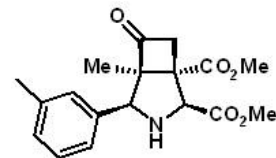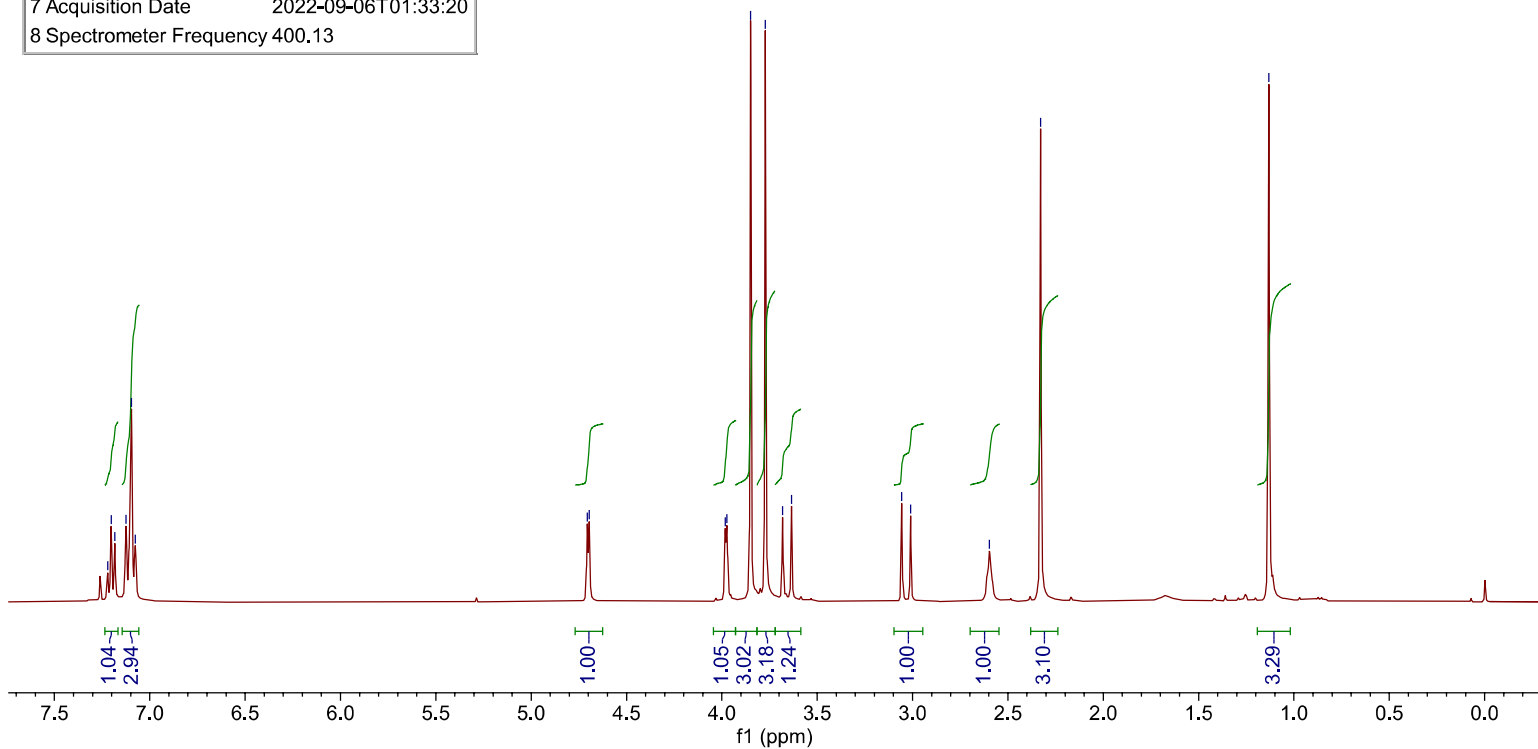

207.09

171.29  
170.47

137.76  
135.90  
129.22  
128.03  
124.53

79.23

70.90

64.50

52.51  
52.31  
50.67  
49.23

21.35

13.24

| Parameter                | Value               |
|--------------------------|---------------------|
| 1 Title                  | c-2-55-b-C.1.fid    |
| 2 Origin                 | Bruker BioSpin GmbH |
| 3 Solvent                | CDCl3               |
| 4 Temperature            | 300.5               |
| 5 Number of Scans        | 300                 |
| 6 Relaxation Delay       | 1.0000              |
| 7 Acquisition Date       | 2022-09-06T01:54:24 |
| 8 Spectrometer Frequency | 100.62              |

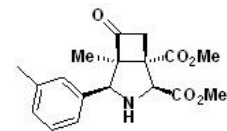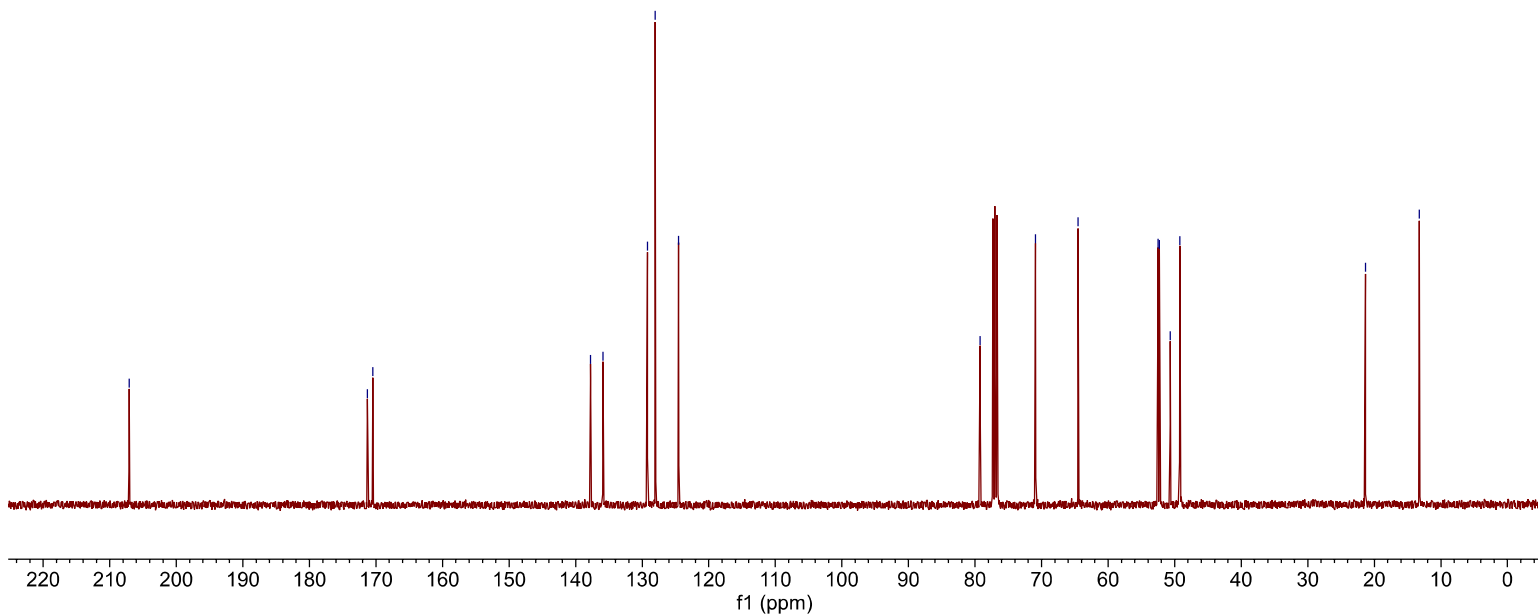

7.41  
7.41  
7.40  
7.39  
7.19  
7.18  
7.17  
7.17  
7.16  
7.15  
7.14  
7.13  
7.12

4.73  
4.73  
4.72  
4.41

3.86  
3.77  
3.71  
3.67

3.10  
3.05

2.53  
2.35

1.14

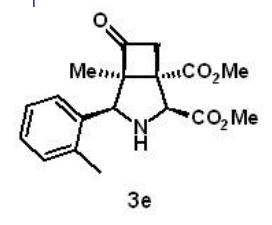

| Parameter                | Value               |
|--------------------------|---------------------|
| 1 Title                  | LLC-2-52.1.fid      |
| 2 Origin                 | Bruker BioSpin GmbH |
| 3 Solvent                | CDCl3               |
| 4 Temperature            | 300.2               |
| 5 Number of Scans        | 4                   |
| 6 Relaxation Delay       | 5.0000              |
| 7 Acquisition Date       | 2022-09-04T03:06:28 |
| 8 Spectrometer Frequency | 400.13              |

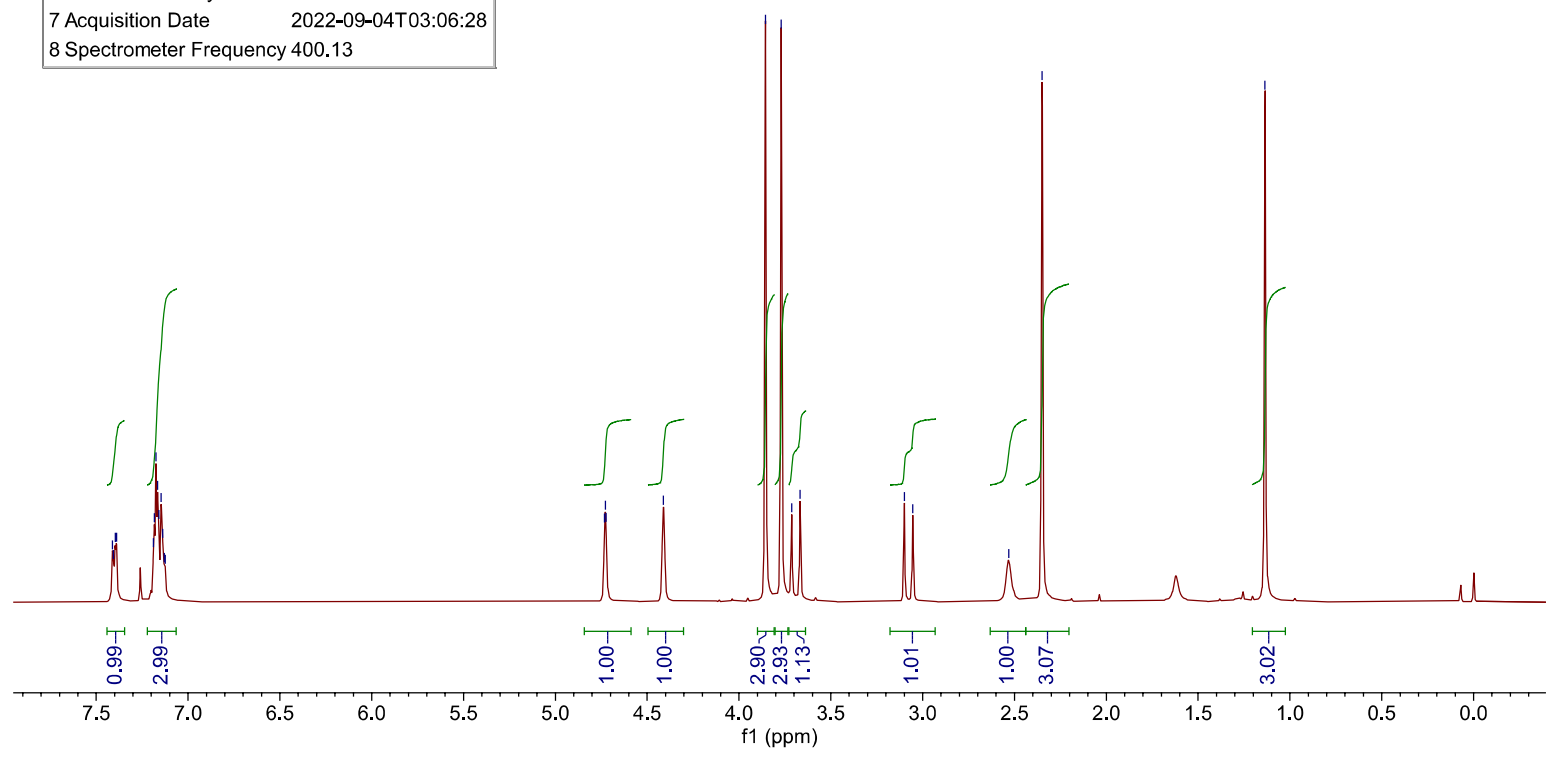

207.34

171.33  
170.45

135.77  
133.91  
130.54  
128.17  
127.99  
125.83

80.38

65.91  
64.75

52.58  
52.36  
50.84  
49.29

19.91  
13.61

| Parameter                | Value               |
|--------------------------|---------------------|
| 1 Title                  | LLC-2-52-C.1.fid    |
| 2 Origin                 | Bruker BioSpin GmbH |
| 3 Solvent                | CDCl3               |
| 4 Temperature            | 300.7               |
| 5 Number of Scans        | 300                 |
| 6 Relaxation Delay       | 1.0000              |
| 7 Acquisition Date       | 2022-09-04T04:15:03 |
| 8 Spectrometer Frequency | 100.62              |

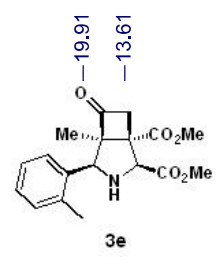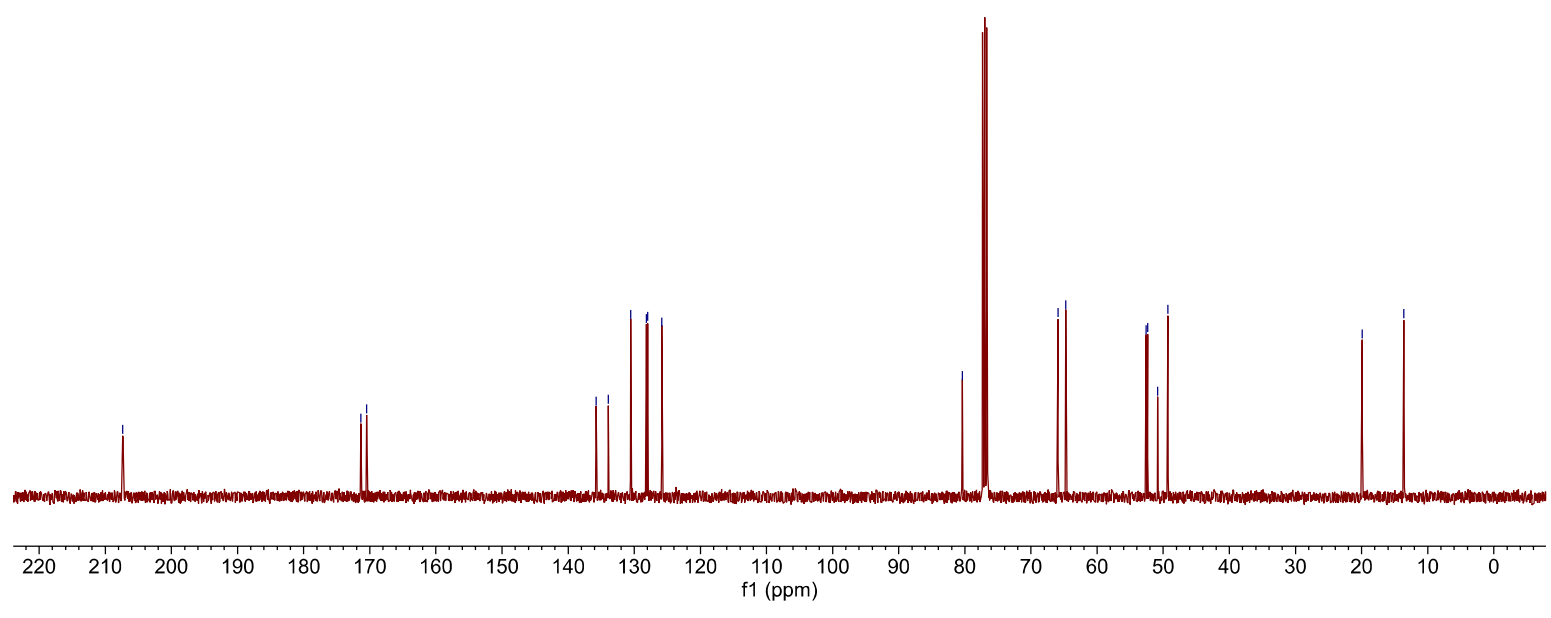

7.26  
7.08  
7.06  
7.04  
7.03  
7.02  
7.01  
7.00

4.69  
4.68

3.95  
3.94  
3.85  
3.77  
3.75  
3.68  
3.63

3.05  
3.00

2.58  
2.57  
2.56  
2.29  
2.27  
2.23  
2.04

1.25  
1.12

| Parameter                | Value               |
|--------------------------|---------------------|
| 1 Title                  | llc-1-171.1.fid     |
| 2 Origin                 | Bruker BioSpin GmbH |
| 3 Solvent                | CDCl3               |
| 4 Temperature            | 298.8               |
| 5 Number of Scans        | 4                   |
| 6 Relaxation Delay       | 5.0000              |
| 7 Acquisition Date       | 2022-07-22T01:51:02 |
| 8 Spectrometer Frequency | 400.13              |

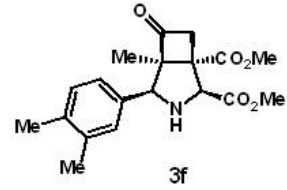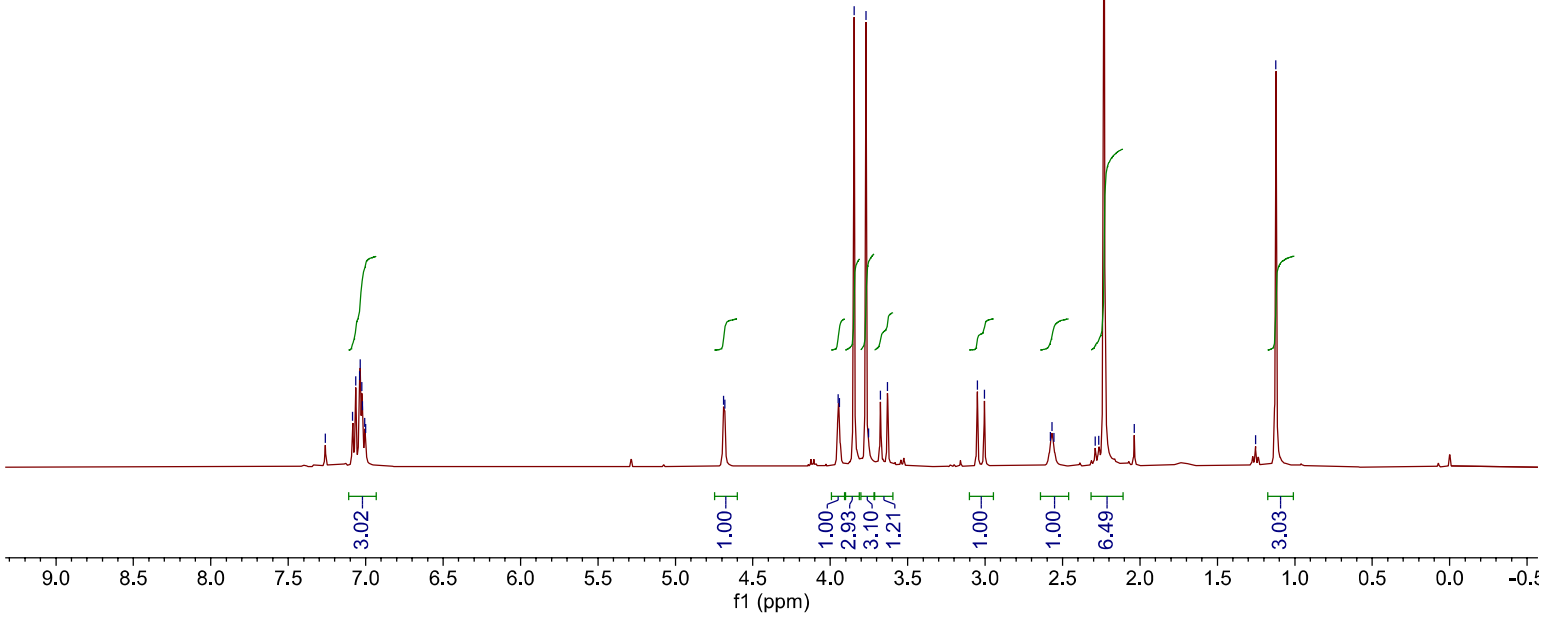

207.37

171.34  
170.53

136.78  
136.35  
133.30  
129.47  
128.58  
124.83

79.27

70.82

64.49

52.51

52.32

50.70

49.18

19.73

19.46

13.25

| Parameter                | Value                  |
|--------------------------|------------------------|
| 1 Title                  | llc-1-171-carbon.1.fid |
| 2 Origin                 | Bruker BioSpin GmbH    |
| 3 Solvent                | CDCl3                  |
| 4 Temperature            | 299.3                  |
| 5 Number of Scans        | 300                    |
| 6 Relaxation Delay       | 1.0000                 |
| 7 Acquisition Date       | 2022-07-22T02:38:43    |
| 8 Spectrometer Frequency | 100.62                 |

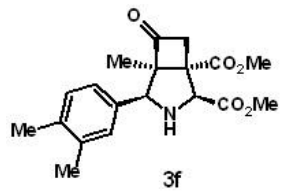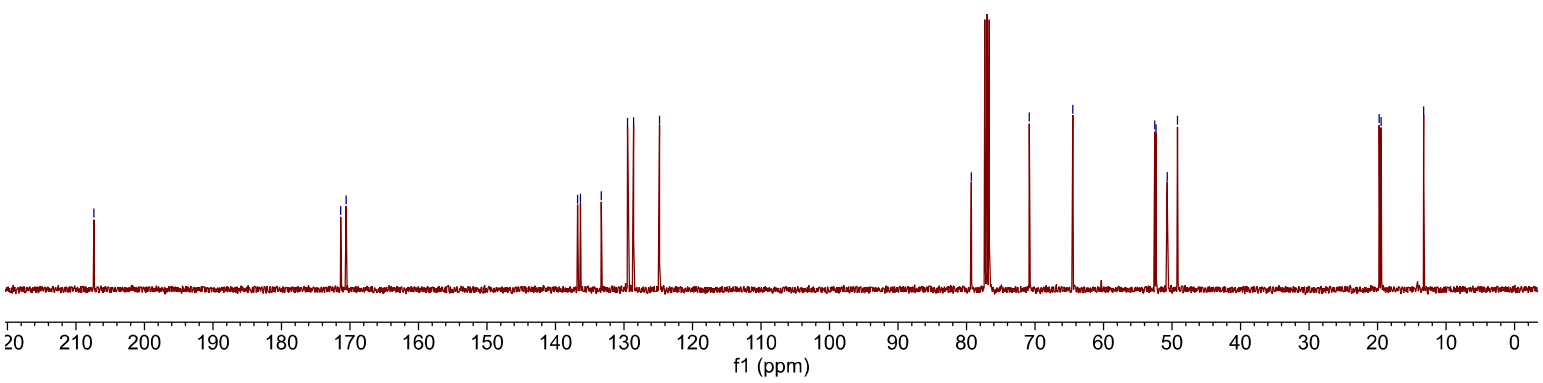

7.39  
7.38  
7.36  
7.15  
7.14  
7.13  
7.12

4.70  
4.69

3.95  
3.84  
3.76  
3.71  
3.66

3.01  
2.96  
2.60

1.12

| Parameter                | Value               |
|--------------------------|---------------------|
| 1 Title                  | LLC-1-94-2,1.fid    |
| 2 Origin                 | Bruker BioSpin GmbH |
| 3 Solvent                | CDCl3               |
| 4 Temperature            | 297.0               |
| 5 Number of Scans        | 4                   |
| 6 Relaxation Delay       | 5.0000              |
| 7 Acquisition Date       | 2021-12-14T16:28:17 |
| 8 Spectrometer Frequency | 400.13              |

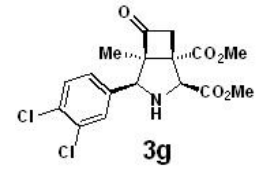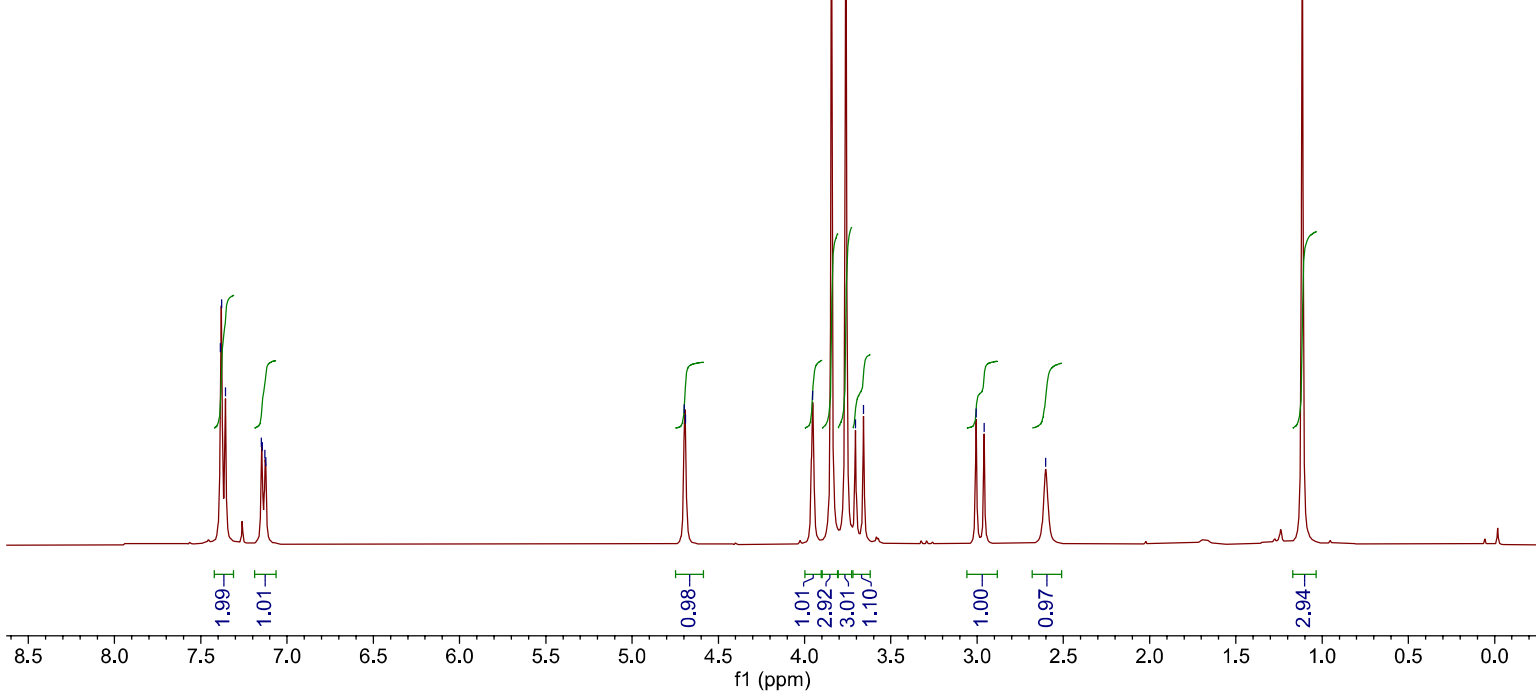

206.74

170.96  
170.11

136.48  
132.39  
132.36  
130.18  
129.26  
126.68

78.50  
69.39  
64.39

52.68  
52.43  
50.36  
49.47

13.01

| Parameter                | Value                   |
|--------------------------|-------------------------|
| 1 Title                  | LLC-1-94-2-carbon.1.fid |
| 2 Origin                 | Bruker BioSpin GmbH     |
| 3 Solvent                | CDCl3                   |
| 4 Temperature            | 297.6                   |
| 5 Number of Scans        | 300                     |
| 6 Relaxation Delay       | 1.0000                  |
| 7 Acquisition Date       | 2021-12-14T16:40:45     |
| 8 Spectrometer Frequency | 100.62                  |

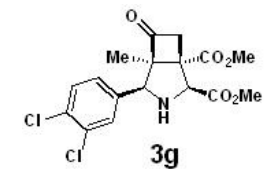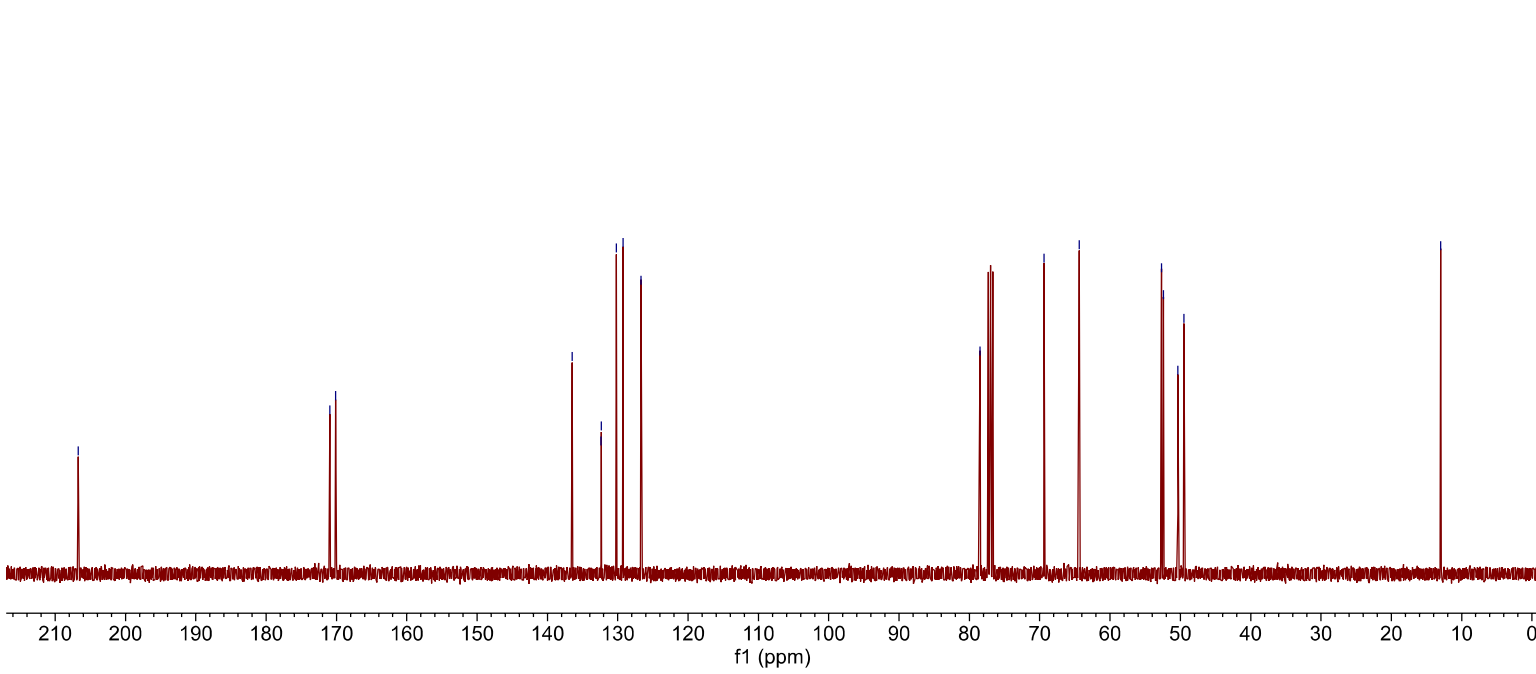

6.94  
6.89

4.69

3.94  
3.86  
3.85  
3.77  
3.68  
3.63

3.06  
3.01

2.58

2.29

1.13

| Parameter                | Value               |
|--------------------------|---------------------|
| 1 Title                  | llc-1-154-ap.1.fid  |
| 2 Origin                 | Bruker BioSpin GmbH |
| 3 Solvent                | CDCl3               |
| 4 Temperature            | 298.6               |
| 5 Number of Scans        | 4                   |
| 6 Relaxation Delay       | 5.0000              |
| 7 Acquisition Date       | 2022-07-19T04:23:23 |
| 8 Spectrometer Frequency | 400.13              |

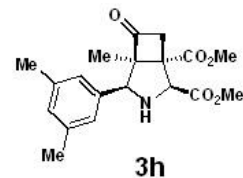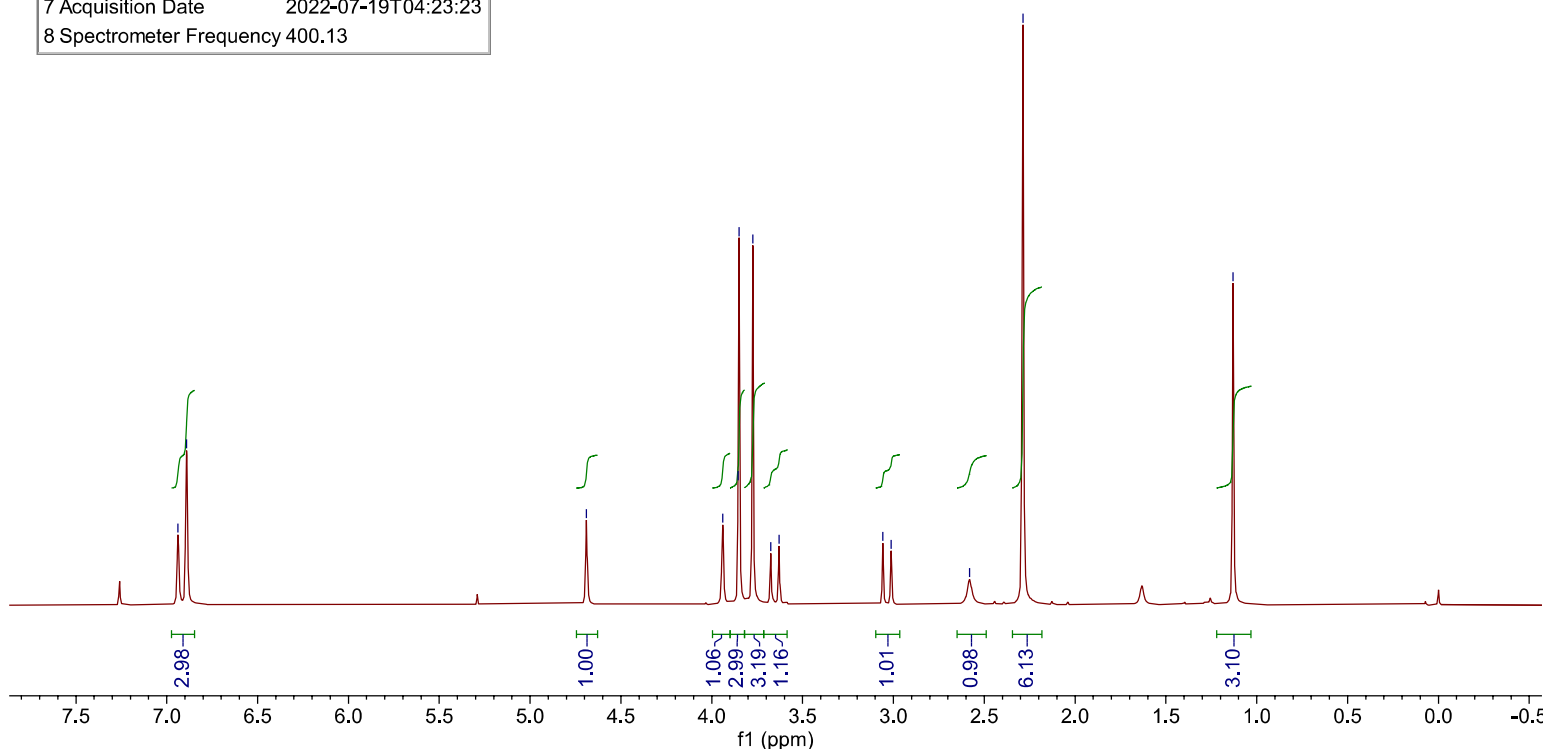

207.18

171.35  
170.56

137.66  
135.84  
130.22  
125.21

79.31

70.95

64.52

52.54

52.36

50.72

49.22

21.26

13.32

| Parameter                | Value                  |
|--------------------------|------------------------|
| 1 Title                  | llc-1-154-carbon.1.fid |
| 2 Origin                 | Bruker BioSpin GmbH    |
| 3 Solvent                | CDCl3                  |
| 4 Temperature            | 299.4                  |
| 5 Number of Scans        | 300                    |
| 6 Relaxation Delay       | 1.0000                 |
| 7 Acquisition Date       | 2022-07-19T15:13:01    |
| 8 Spectrometer Frequency | 100.62                 |

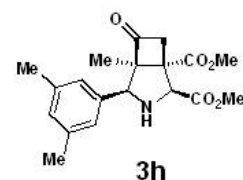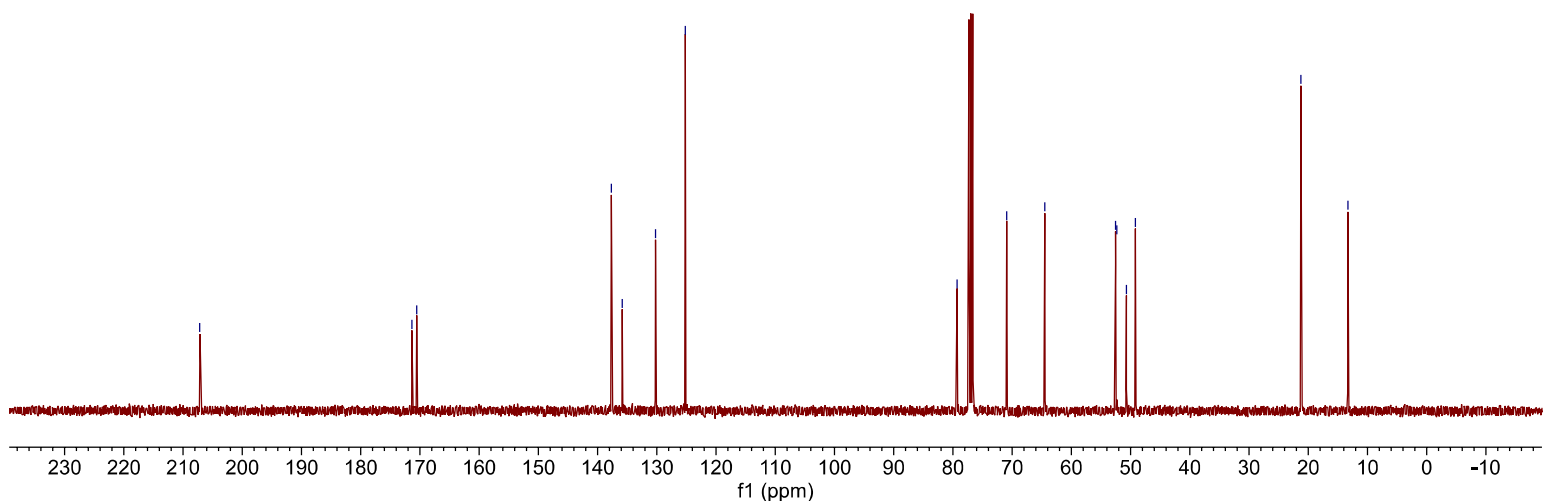



| Parameter                | Value               |
|--------------------------|---------------------|
| 1 Title                  | llc-1-84-r2.1.fid   |
| 2 Origin                 | Bruker BioSpin GmbH |
| 3 Solvent                | CDCl3               |
| 4 Temperature            | 296.8               |
| 5 Number of Scans        | 4                   |
| 6 Relaxation Delay       | 5.0000              |
| 7 Acquisition Date       | 2021-10-24T01:58:15 |
| 8 Spectrometer Frequency | 400.13              |

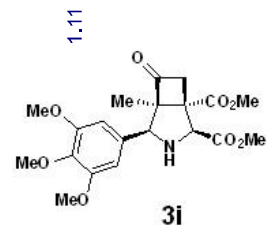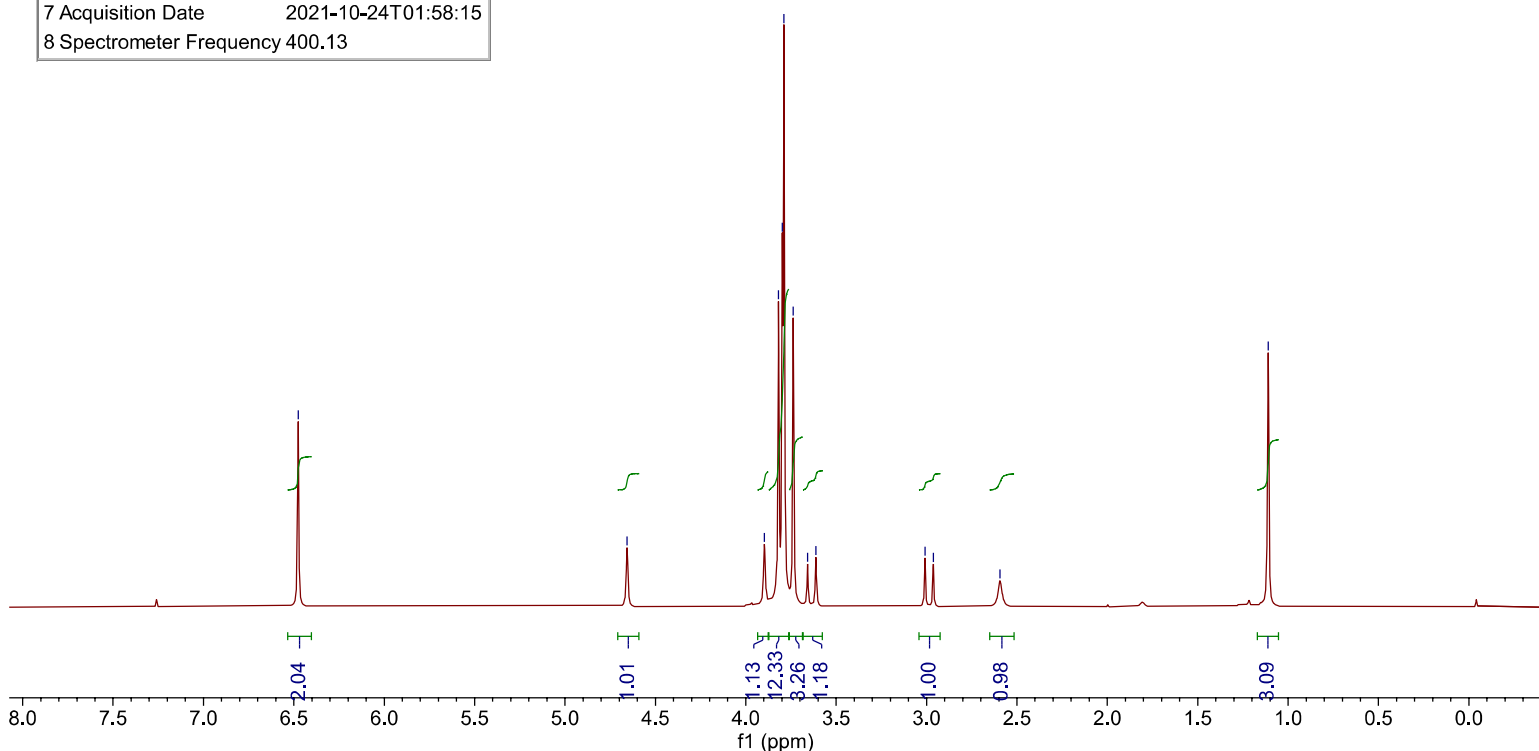

| Parameter                | Value                 |
|--------------------------|-----------------------|
| 1 Title                  | llc-1-84-carbon.1.fid |
| 2 Origin                 | Bruker BioSpin GmbH   |
| 3 Solvent                | CDCl3                 |
| 4 Temperature            | 297.3                 |
| 5 Number of Scans        | 300                   |
| 6 Relaxation Delay       | 1.0000                |
| 7 Acquisition Date       | 2021-10-24T01:56:34   |
| 8 Spectrometer Frequency | 100.62                |

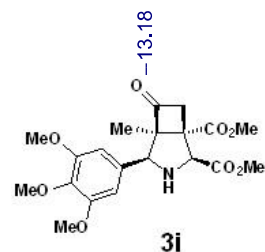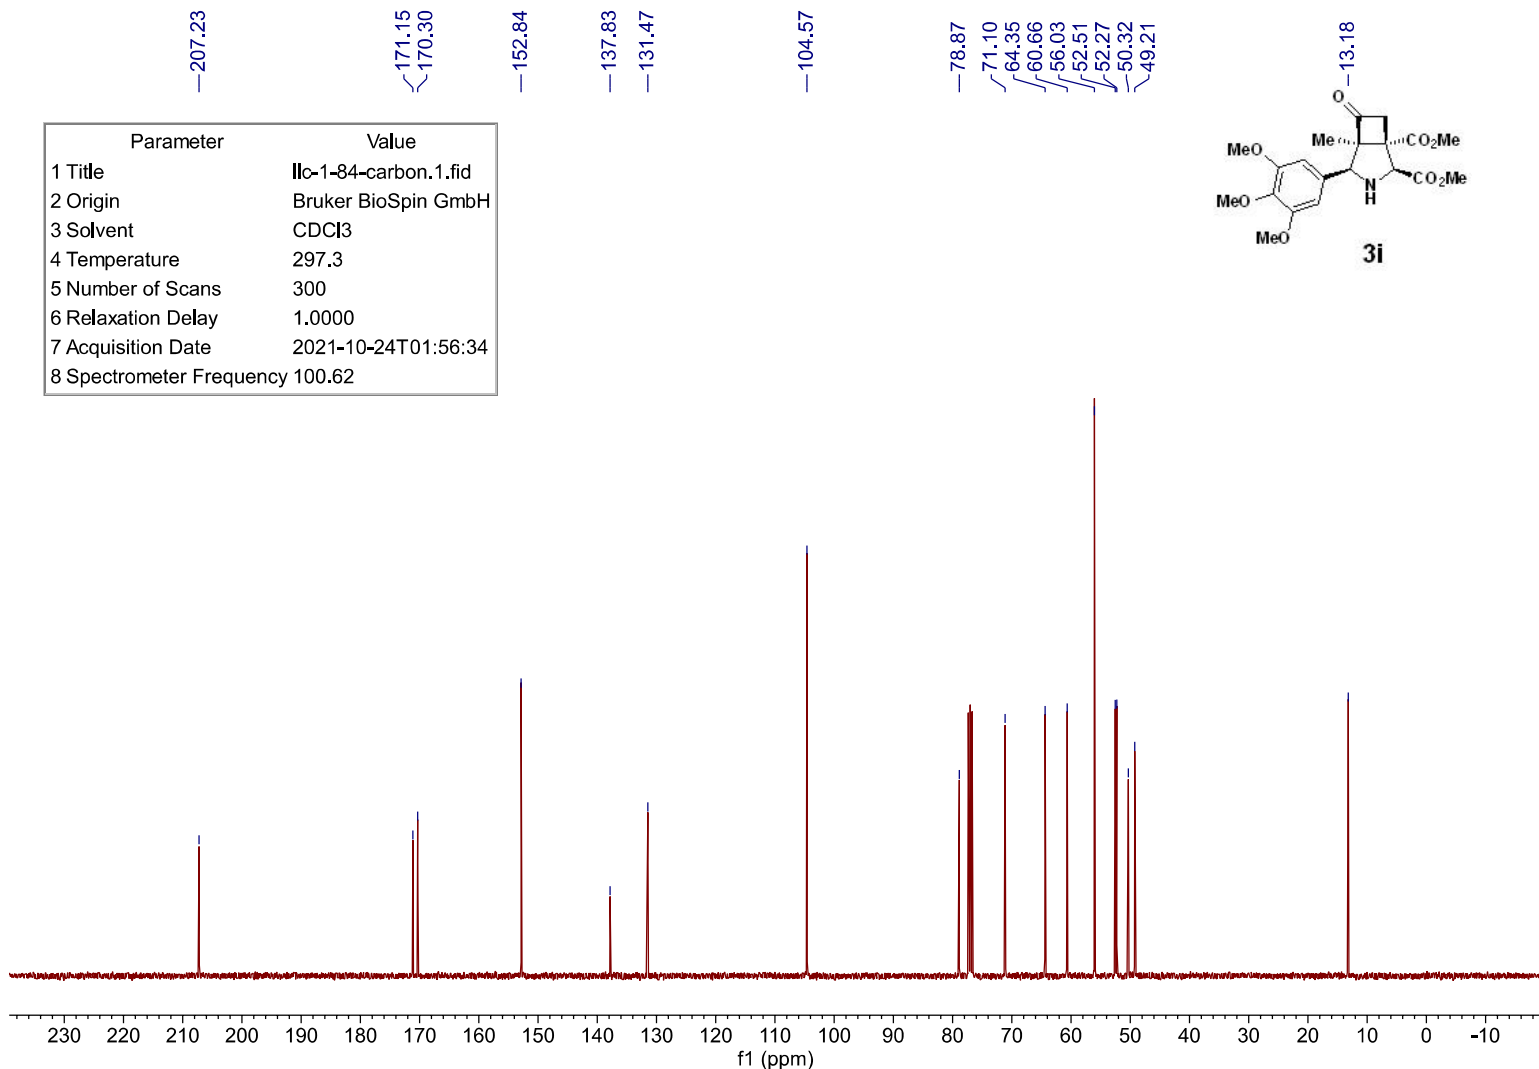

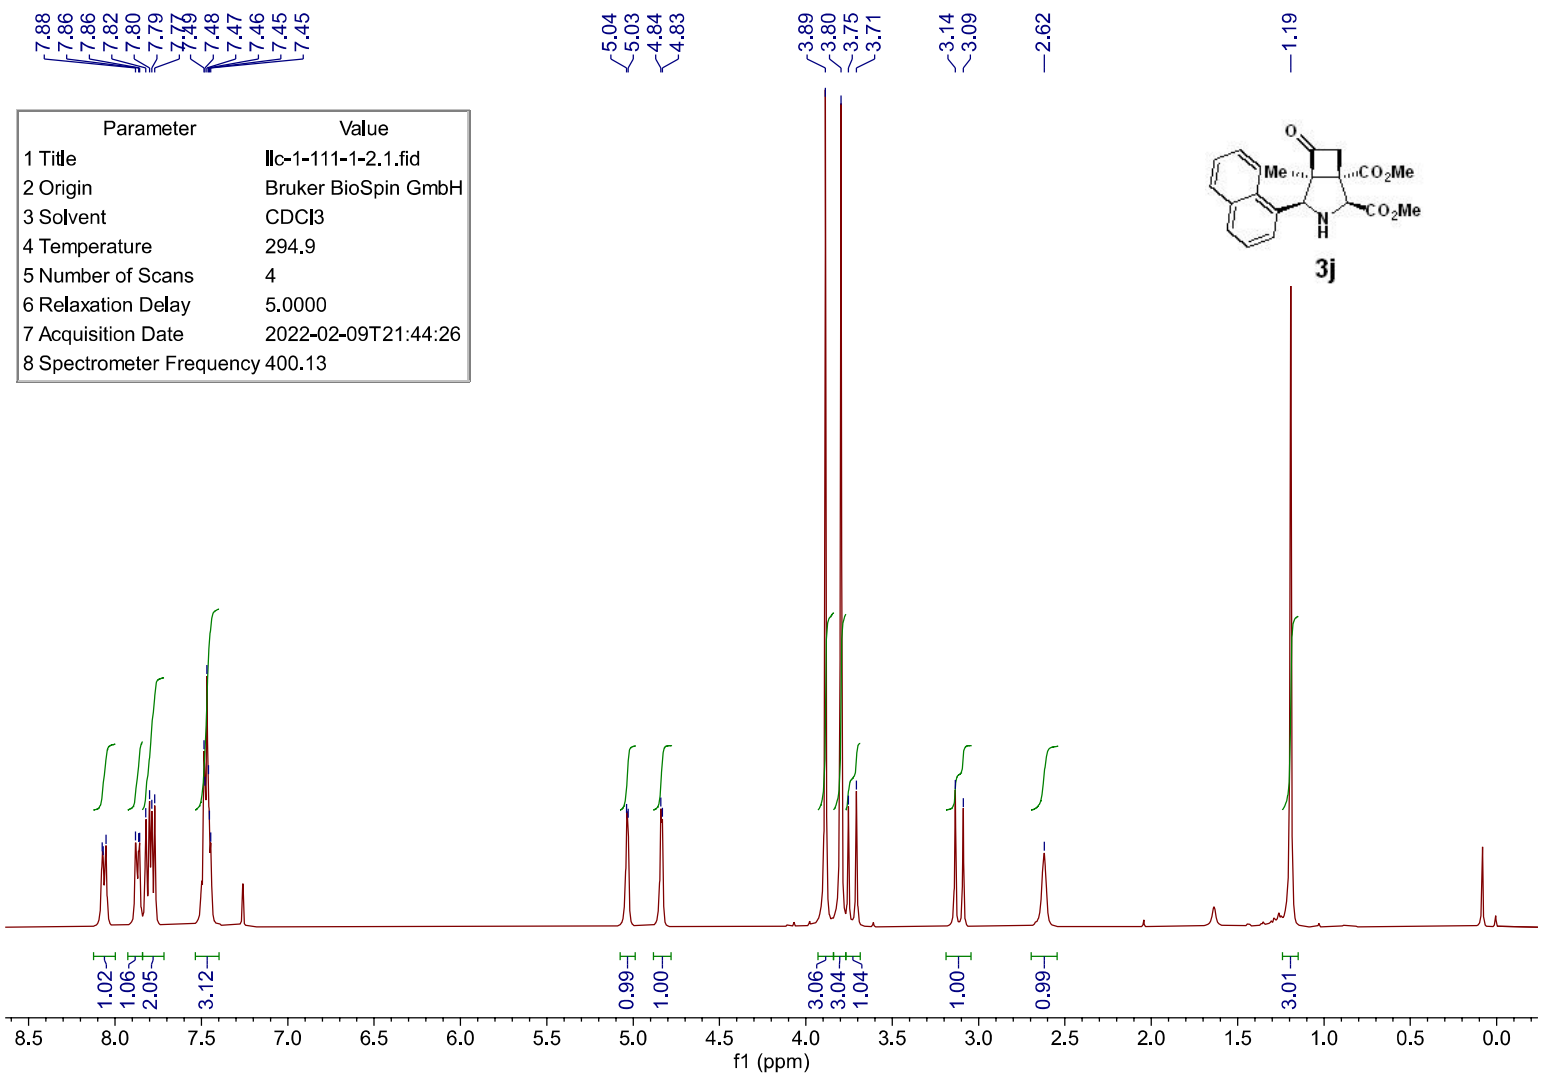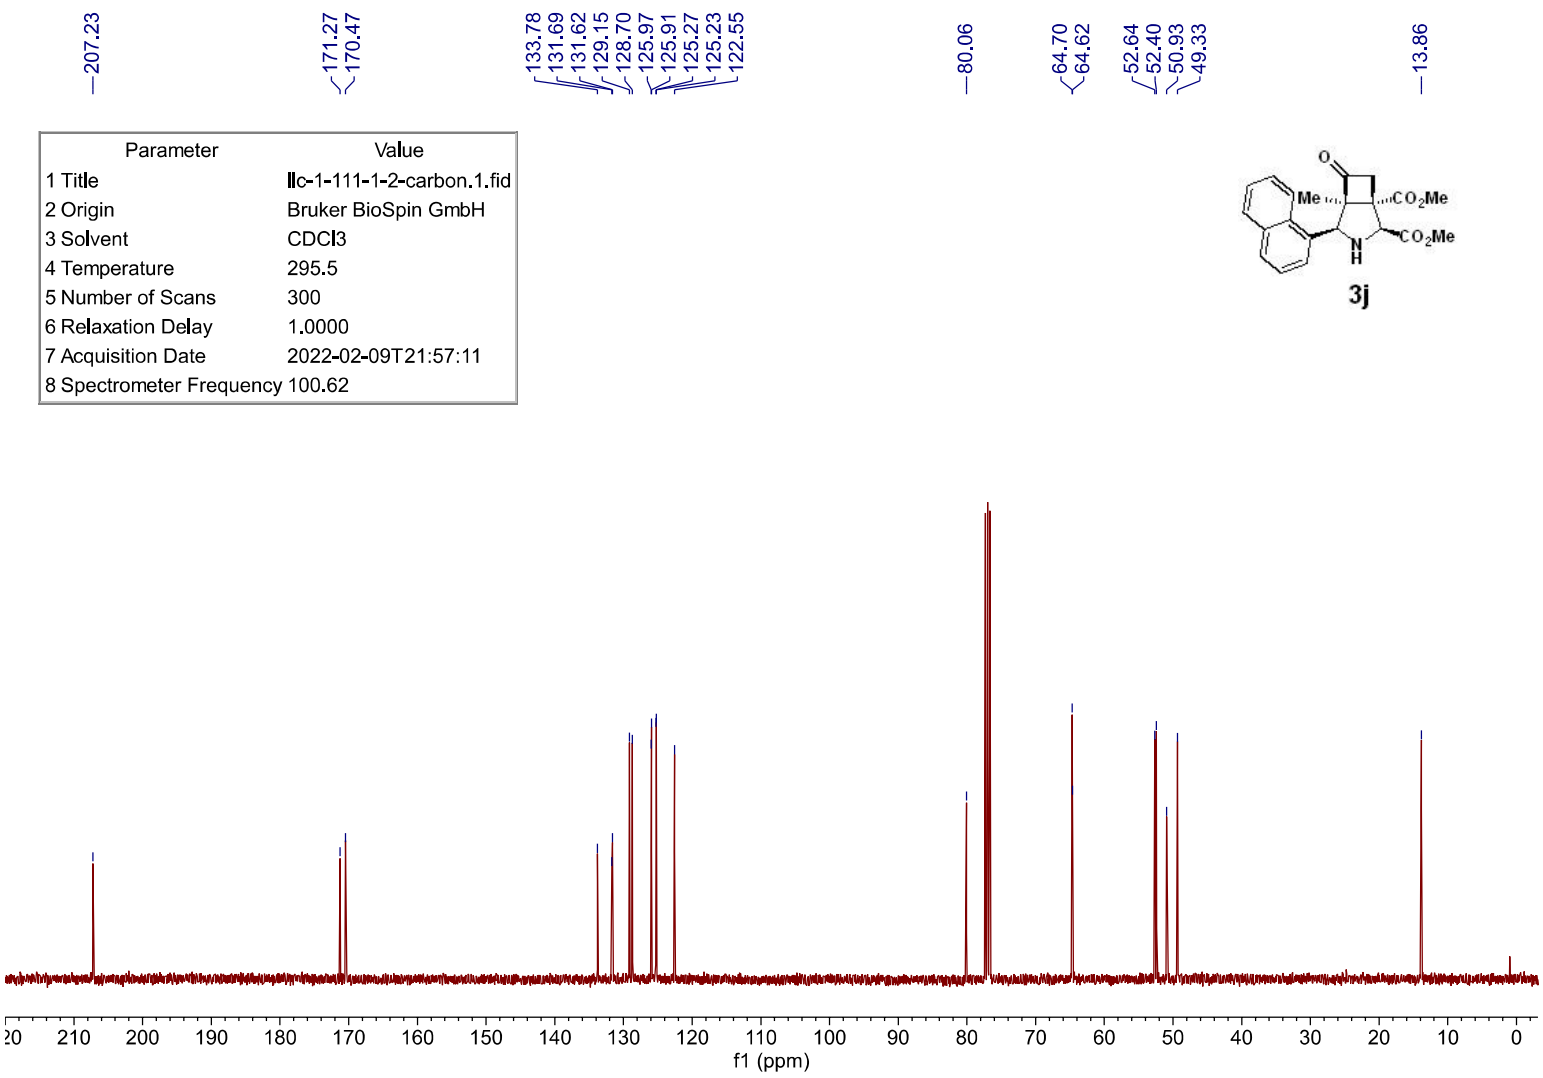

7.38  
7.37  
7.37  
7.26

6.35  
6.34  
6.33  
6.33

4.71  
4.70

4.14  
4.13  
3.85  
3.79  
3.77  
3.77  
3.68  
3.64  
3.01  
2.97  
2.88

1.57

1.25  
1.21

| Parameter                | Value                |
|--------------------------|----------------------|
| 1 Title                  | llc-1-100-p2-1.1.fid |
| 2 Origin                 | Bruker BioSpin GmbH  |
| 3 Solvent                | CDCl3                |
| 4 Temperature            | 296.8                |
| 5 Number of Scans        | 4                    |
| 6 Relaxation Delay       | 5.0000               |
| 7 Acquisition Date       | 2022-01-17T21:19:54  |
| 8 Spectrometer Frequency | 400.13               |

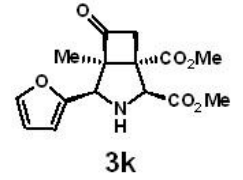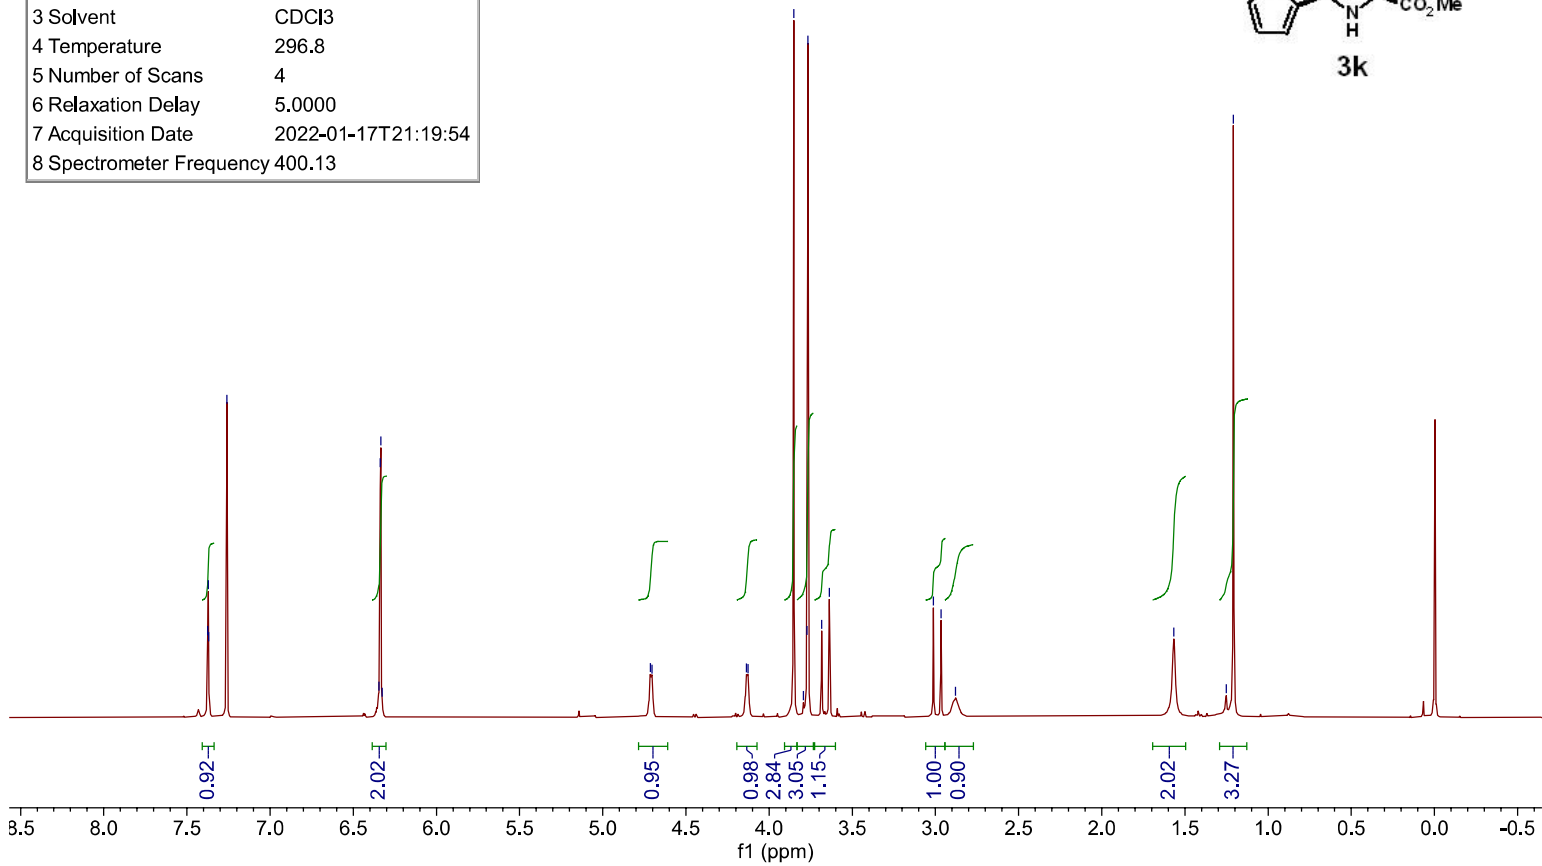

206.02

170.94  
170.13

149.57

142.57

110.35  
107.72

79.40

64.92

52.67  
52.50  
51.79  
48.78

13.66

| Parameter                | Value                     |
|--------------------------|---------------------------|
| 1 Title                  | llc-1-100-p1-carbon.1.fid |
| 2 Origin                 | Bruker BioSpin GmbH       |
| 3 Solvent                | CDCl3                     |
| 4 Temperature            | 296.7                     |
| 5 Number of Scans        | 300                       |
| 6 Relaxation Delay       | 1.0000                    |
| 7 Acquisition Date       | 2022-01-16T01:26:42       |
| 8 Spectrometer Frequency | 100.62                    |

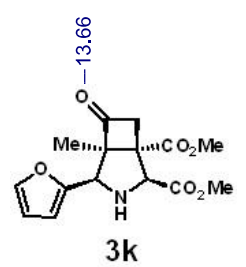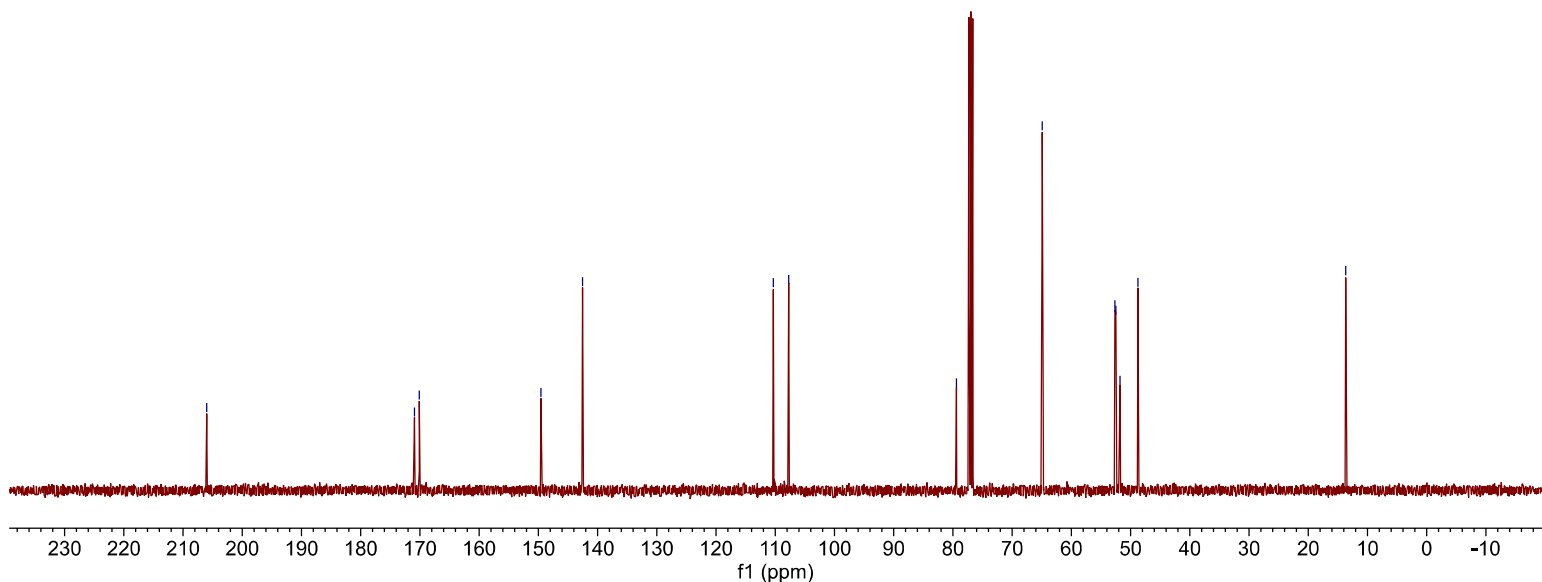

7.26  
7.24  
7.24  
7.23  
7.23  
7.02  
7.01  
7.01  
7.00  
7.00  
6.99  
6.98  
6.97

4.70  
4.69

4.32  
4.32

3.84  
3.77  
3.76  
3.68  
3.63

3.05  
3.00  
2.83

1.19

| Parameter                | Value               |
|--------------------------|---------------------|
| 1 Title                  | llc-1-102-H2.1.fid  |
| 2 Origin                 | Bruker BioSpin GmbH |
| 3 Solvent                | CDCl3               |
| 4 Temperature            | 297.4               |
| 5 Number of Scans        | 4                   |
| 6 Relaxation Delay       | 5.0000              |
| 7 Acquisition Date       | 2022-01-20T01:12:36 |
| 8 Spectrometer Frequency | 400.13              |

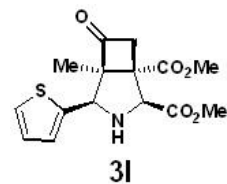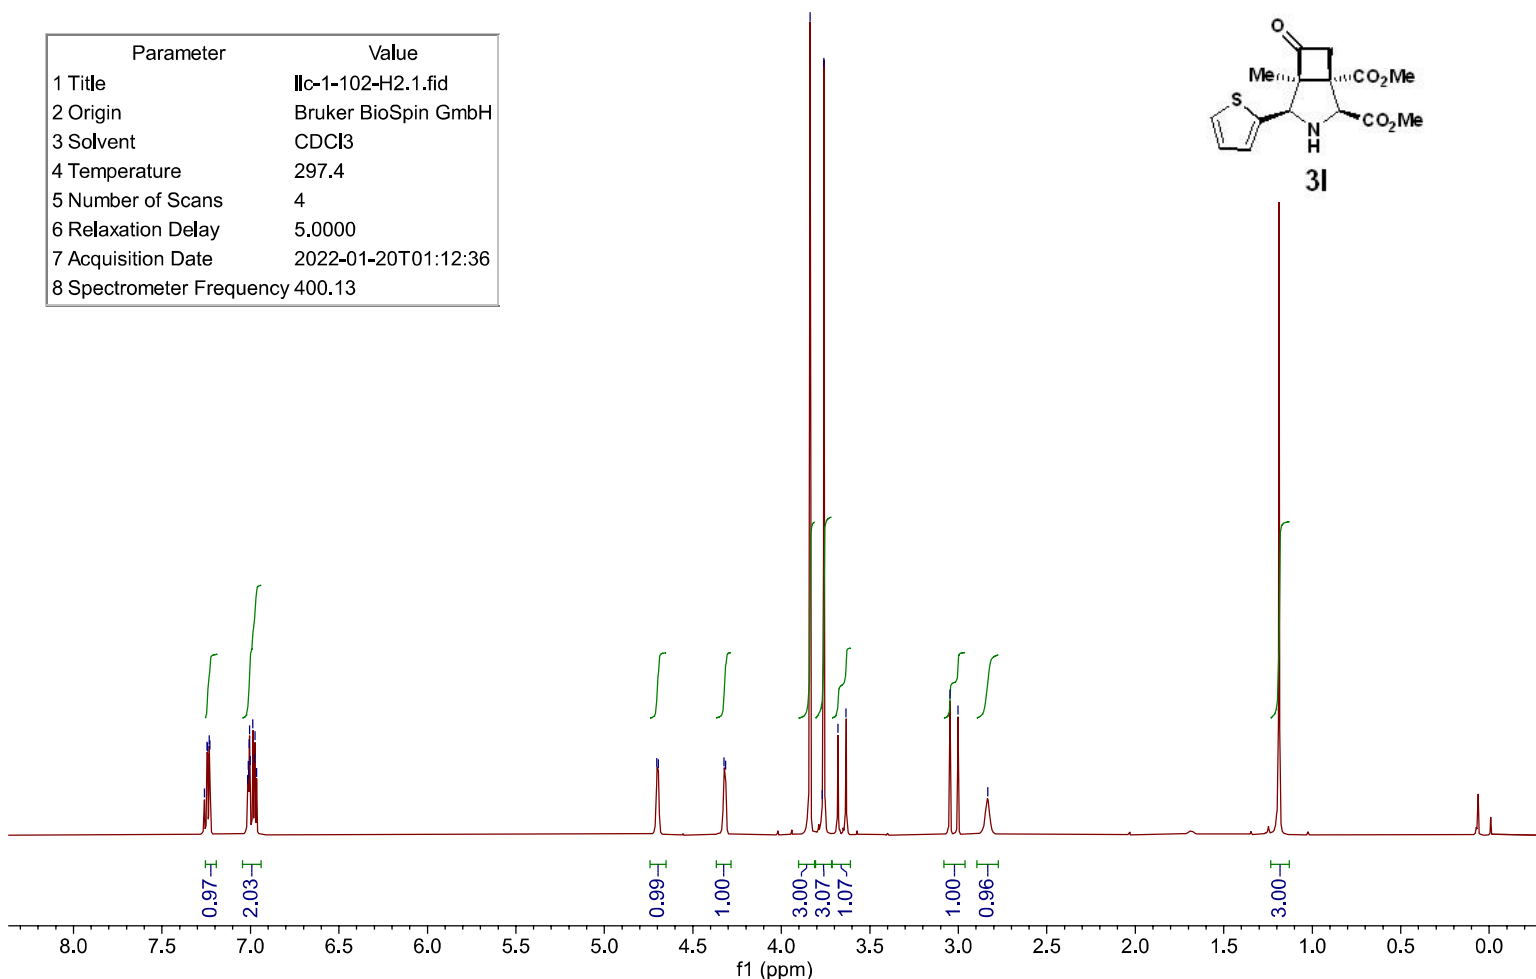

206.45

171.03  
170.01

139.54

126.77  
125.05  
124.88

78.99

66.60  
64.47

52.60  
52.39  
50.88  
49.46

13.37

| Parameter                | Value                   |
|--------------------------|-------------------------|
| 1 Title                  | llc-1-102-carbon2.1.fid |
| 2 Origin                 | Bruker BioSpin GmbH     |
| 3 Solvent                | CDCl3                   |
| 4 Temperature            | 298.1                   |
| 5 Number of Scans        | 300                     |
| 6 Relaxation Delay       | 1.0000                  |
| 7 Acquisition Date       | 2022-01-20T01:24:58     |
| 8 Spectrometer Frequency | 100.62                  |

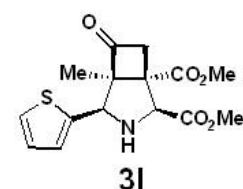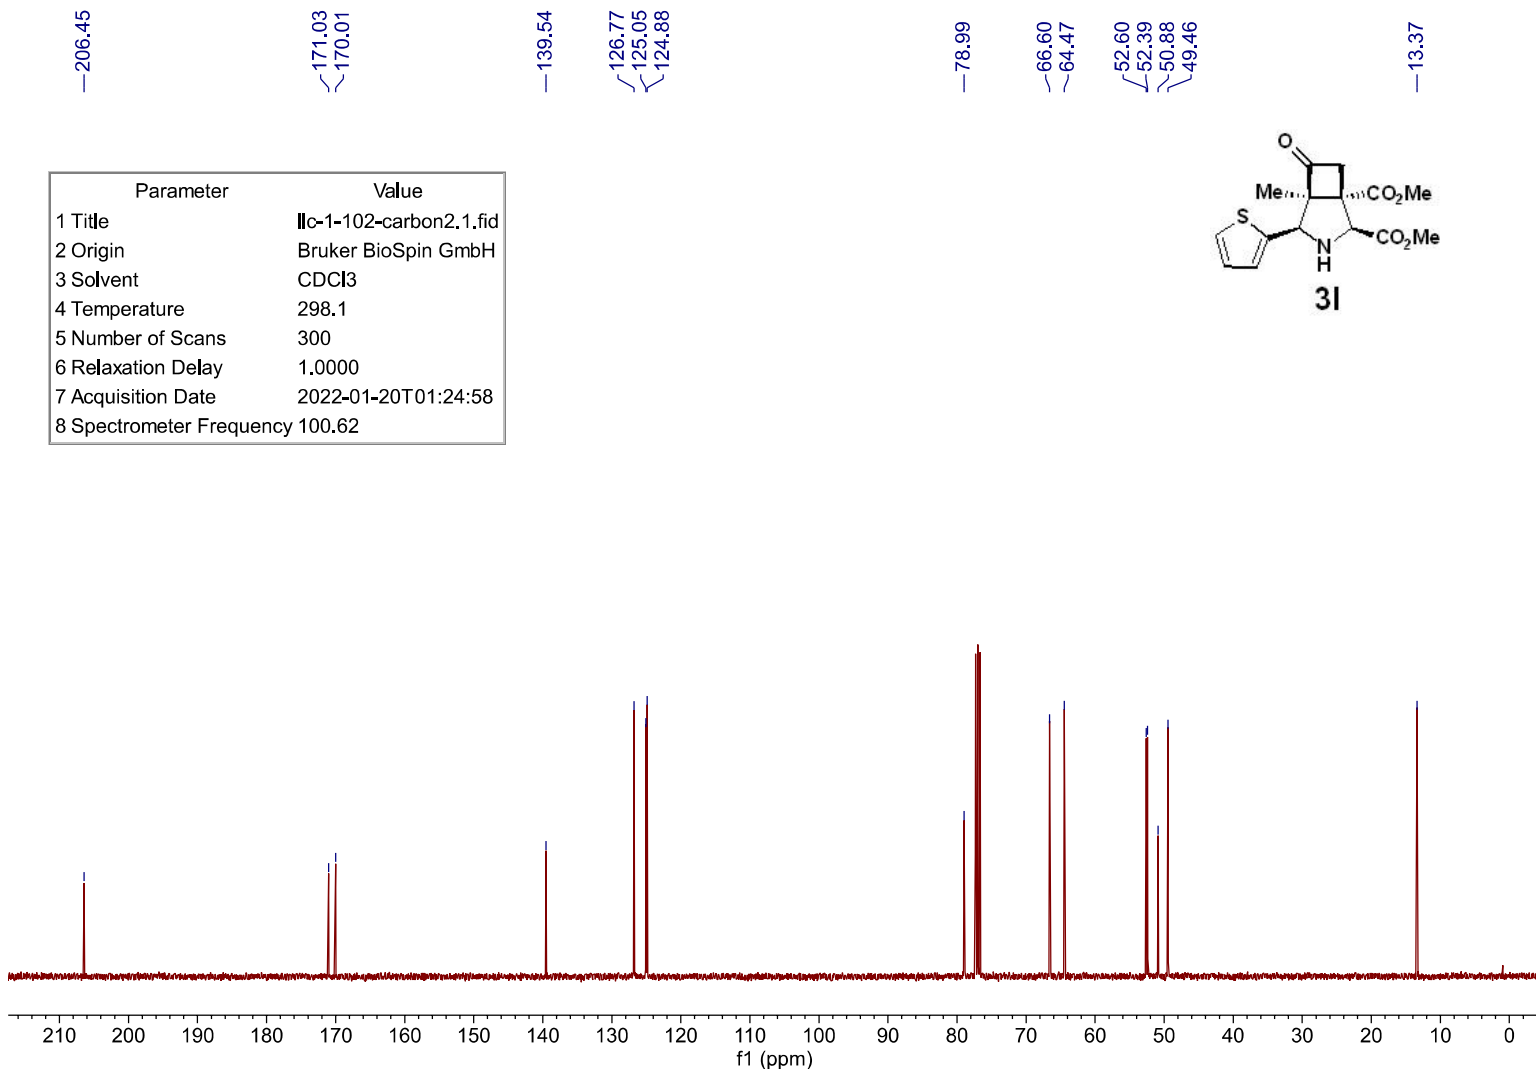

4.52  
3.80  
3.71  
3.67  
3.62  
2.85  
2.80  
2.36  
2.35  
2.34  
2.19  
2.17  
1.15  
0.90  
0.89  
0.89  
0.88  
0.87  
0.86  
0.85  
0.85  
0.84  
0.82  
0.64  
0.63  
0.62  
0.60  
0.60  
0.59  
0.58  
0.57  
0.54  
0.53  
0.53  
0.52  
0.51  
0.50  
0.49  
0.48  
0.27  
0.25  
0.24  
0.23  
0.22  
0.20  
0.15  
0.14  
0.13  
0.12  
0.11  
0.09

| Parameter                | Value               |
|--------------------------|---------------------|
| 1 Title                  | llc-2-38-H.1.fid    |
| 2 Origin                 | Bruker BioSpin GmbH |
| 3 Solvent                | CDCl3               |
| 4 Temperature            | 300.3               |
| 5 Number of Scans        | 4                   |
| 6 Relaxation Delay       | 5.0000              |
| 7 Acquisition Date       | 2022-08-27T19:57:35 |
| 8 Spectrometer Frequency | 400.13              |

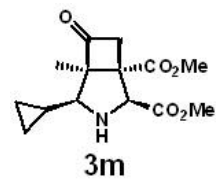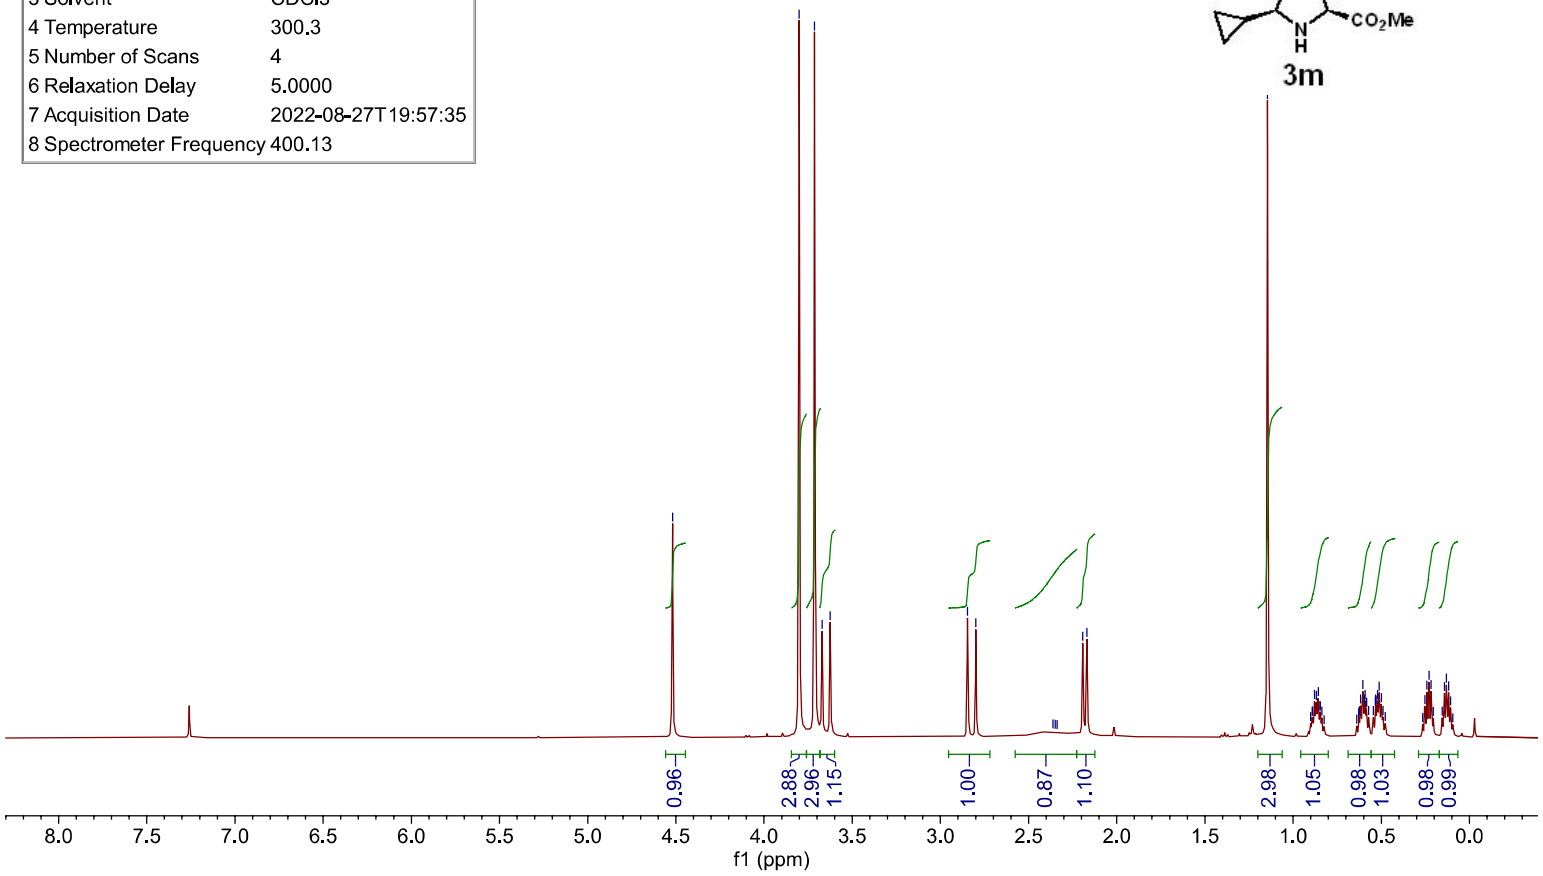

208.82

171.27  
170.55

79.10

72.48

64.53

52.50

52.32

52.07

48.57

13.41

10.03

2.65

2.17

| Parameter                | Value                 |
|--------------------------|-----------------------|
| 1 Title                  | llc-2-38-Carbon.1.fid |
| 2 Origin                 | Bruker BioSpin GmbH   |
| 3 Solvent                | CDCl3                 |
| 4 Temperature            | 300.8                 |
| 5 Number of Scans        | 300                   |
| 6 Relaxation Delay       | 1.0000                |
| 7 Acquisition Date       | 2022-08-27T20:52:07   |
| 8 Spectrometer Frequency | 100.62                |

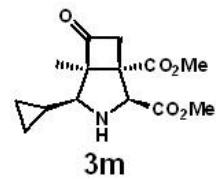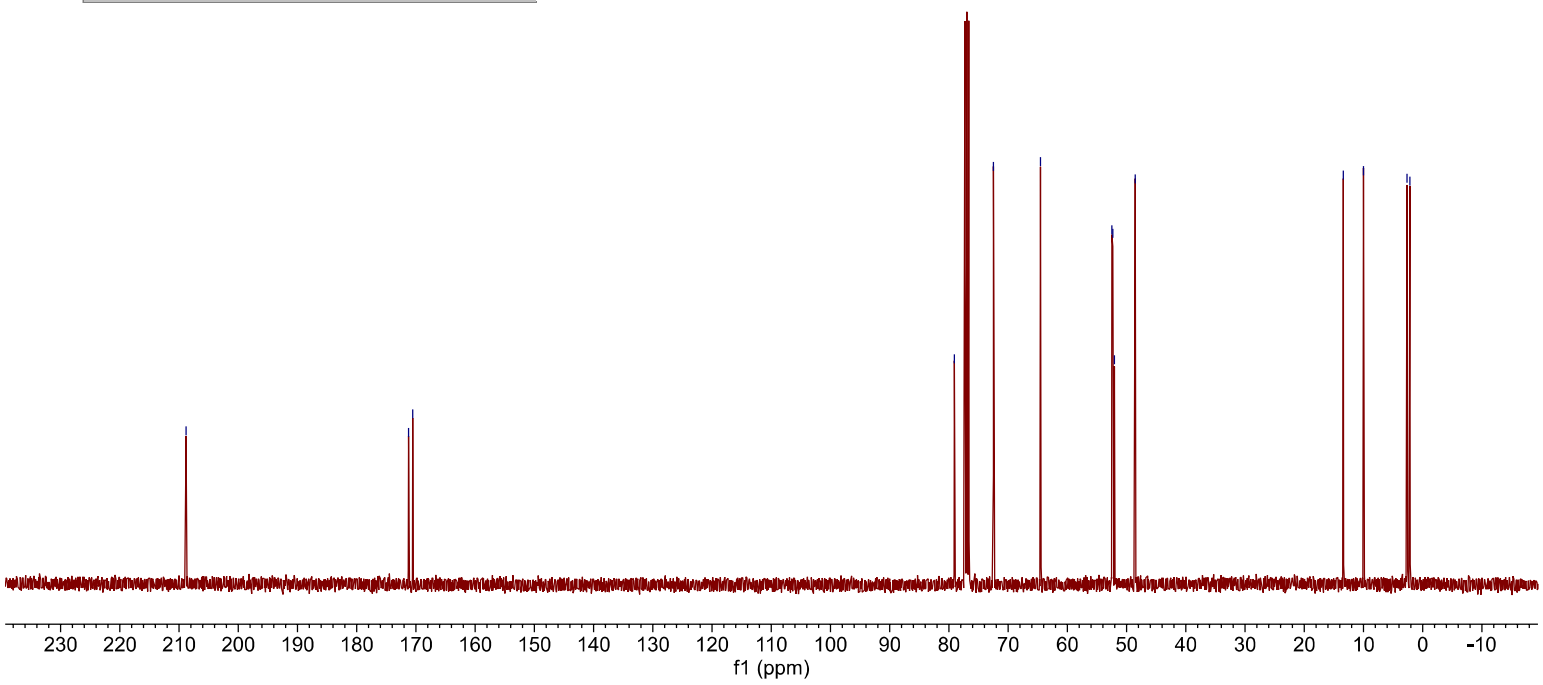

4.52  
3.79  
3.78  
3.69  
3.51  
3.47  
2.82  
2.77  
2.74  
2.71  
2.44  
2.44  
1.99  
1.99  
1.98  
1.97  
1.95  
1.88  
1.87  
1.87  
1.85  
1.84  
1.83  
1.71  
1.70  
1.69  
1.69  
1.67  
1.66  
1.63  
1.63  
1.63  
1.62  
1.62  
1.61  
1.60  
1.59  
1.58  
1.37  
1.36  
1.36  
1.35  
1.35  
1.34  
1.34  
1.25  
1.22  
1.22  
1.19  
1.19  
1.18  
1.18  
1.16  
1.15  
1.13  
1.13  
1.11  
1.10  
1.10  
1.07  
1.07  
1.03  
1.03  
1.01  
1.01  
1.00  
1.00  
0.98  
0.98  
0.97  
0.95

| Parameter                | Value               |
|--------------------------|---------------------|
| 1 Title                  | llc-1-108-H2.1.fid  |
| 2 Origin                 | Bruker BioSpin GmbH |
| 3 Solvent                | CDCl3               |
| 4 Temperature            | 297.2               |
| 5 Number of Scans        | 4                   |
| 6 Relaxation Delay       | 5.0000              |
| 7 Acquisition Date       | 2022-01-21T18:26:28 |
| 8 Spectrometer Frequency | 400.13              |

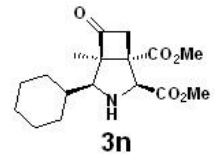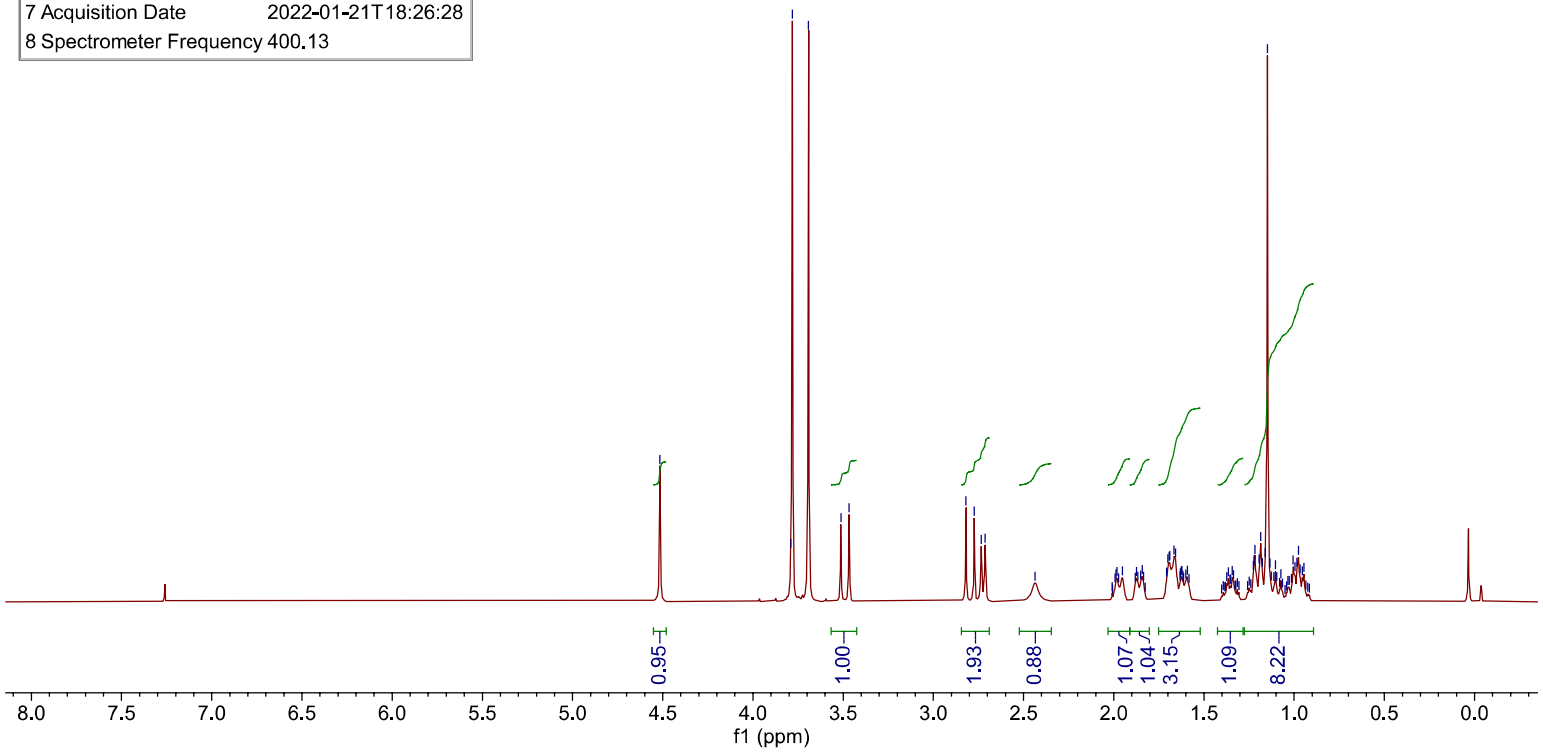

207.48  
171.20  
170.69  
79.93  
72.91  
64.26  
53.17  
52.45  
47.95  
40.91  
31.38  
30.27  
26.00  
25.75  
25.69  
16.11

| Parameter                | Value                  |
|--------------------------|------------------------|
| 1 Title                  | llc-1-107-CARBON.1.fid |
| 2 Origin                 | Bruker BioSpin GmbH    |
| 3 Solvent                | CDCl3                  |
| 4 Temperature            | 297.7                  |
| 5 Number of Scans        | 300                    |
| 6 Relaxation Delay       | 1.0000                 |
| 7 Acquisition Date       | 2022-01-21T18:21:54    |
| 8 Spectrometer Frequency | 100.62                 |

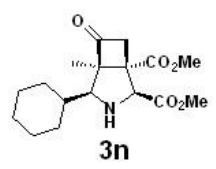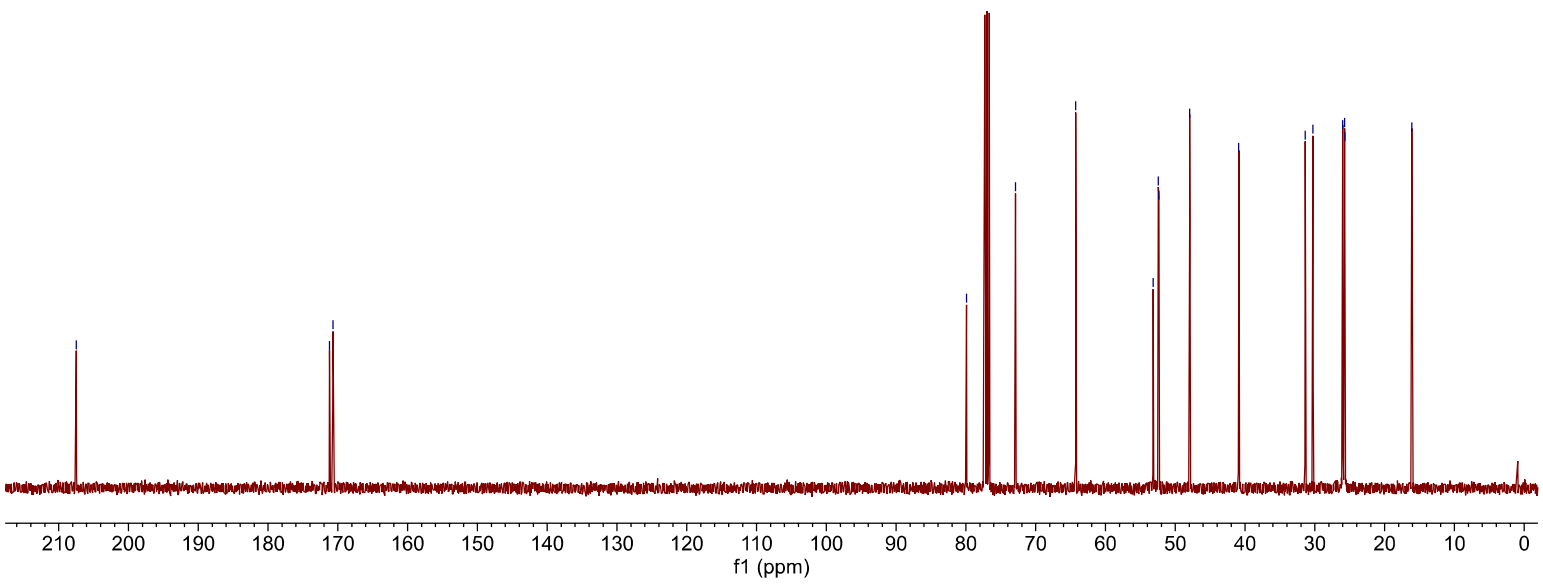

| Parameter                | Value               |
|--------------------------|---------------------|
| 1 Title                  | llc-2-4.1.fid       |
| 2 Origin                 | Bruker BioSpin GmbH |
| 3 Solvent                | CDCl3               |
| 4 Temperature            | 304.0               |
| 5 Number of Scans        | 4                   |
| 6 Relaxation Delay       | 5.0000              |
| 7 Acquisition Date       | 2022-08-04T01:04:58 |
| 8 Spectrometer Frequency | 400.13              |

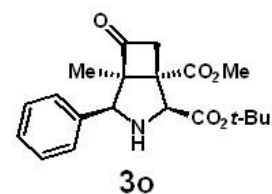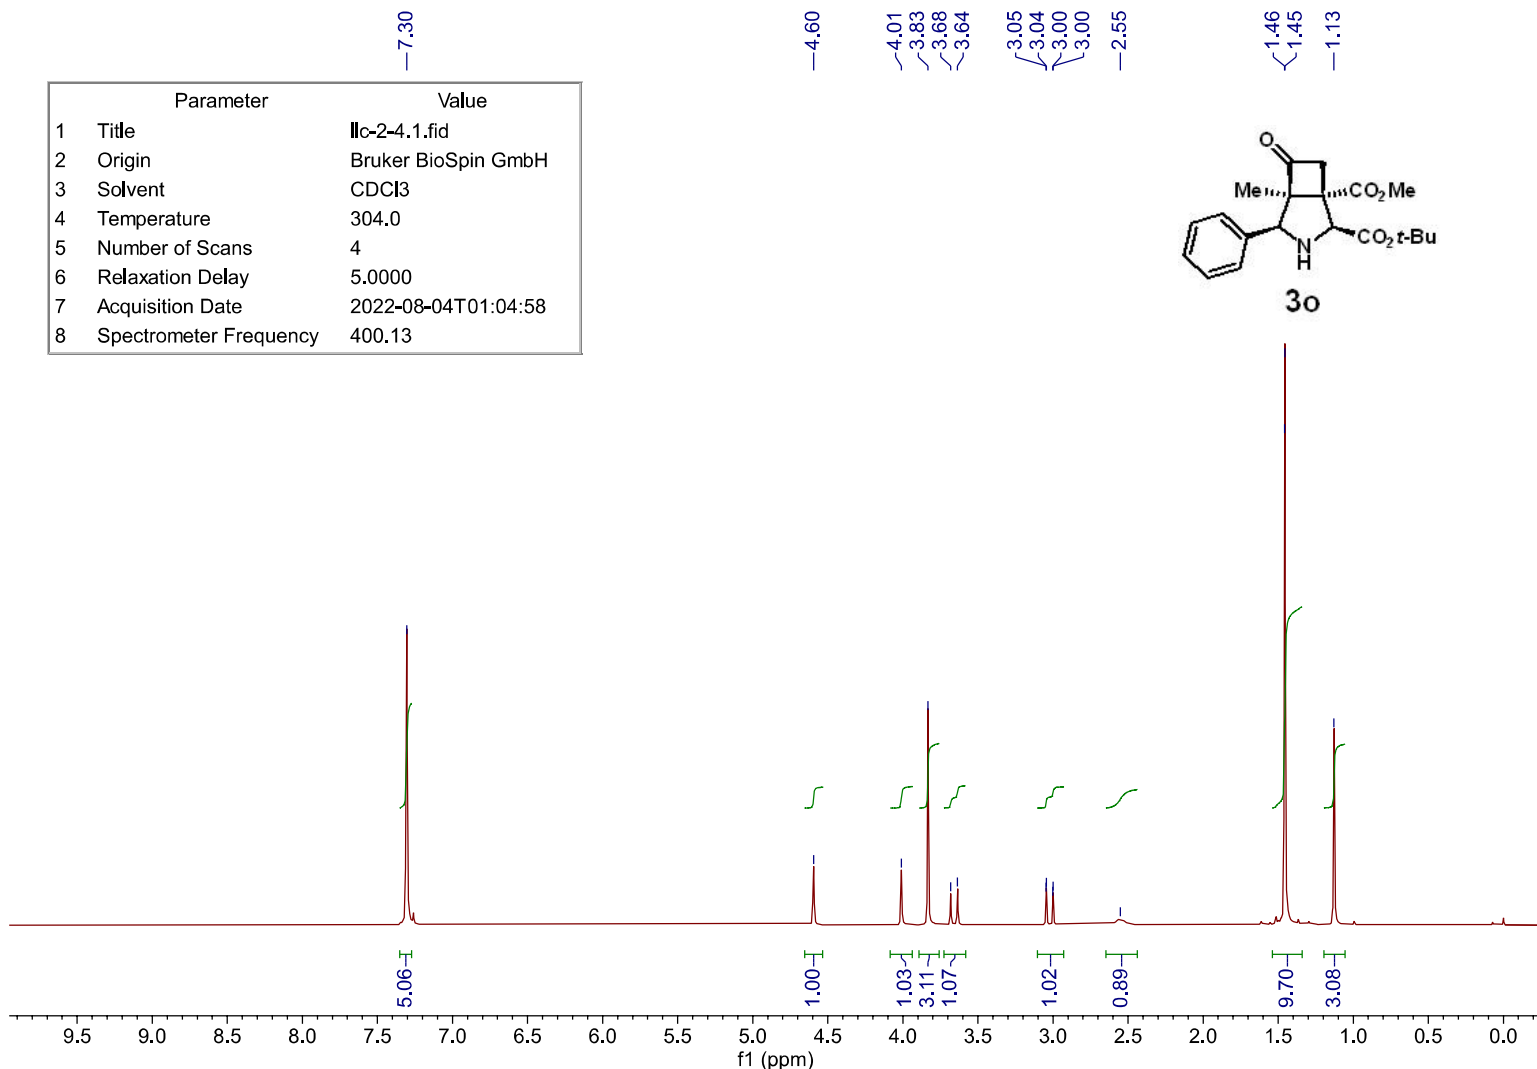

| Parameter                | Value                |
|--------------------------|----------------------|
| 1 Title                  | llc-2-4-Carbon.1.fid |
| 2 Origin                 | Bruker BioSpin GmbH  |
| 3 Solvent                | CDCl3                |
| 4 Temperature            | 304.4                |
| 5 Number of Scans        | 300                  |
| 6 Relaxation Delay       | 1.0000               |
| 7 Acquisition Date       | 2022-08-04T02:24:54  |
| 8 Spectrometer Frequency | 100.62               |

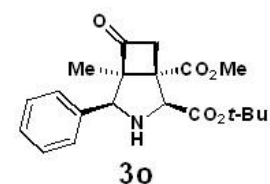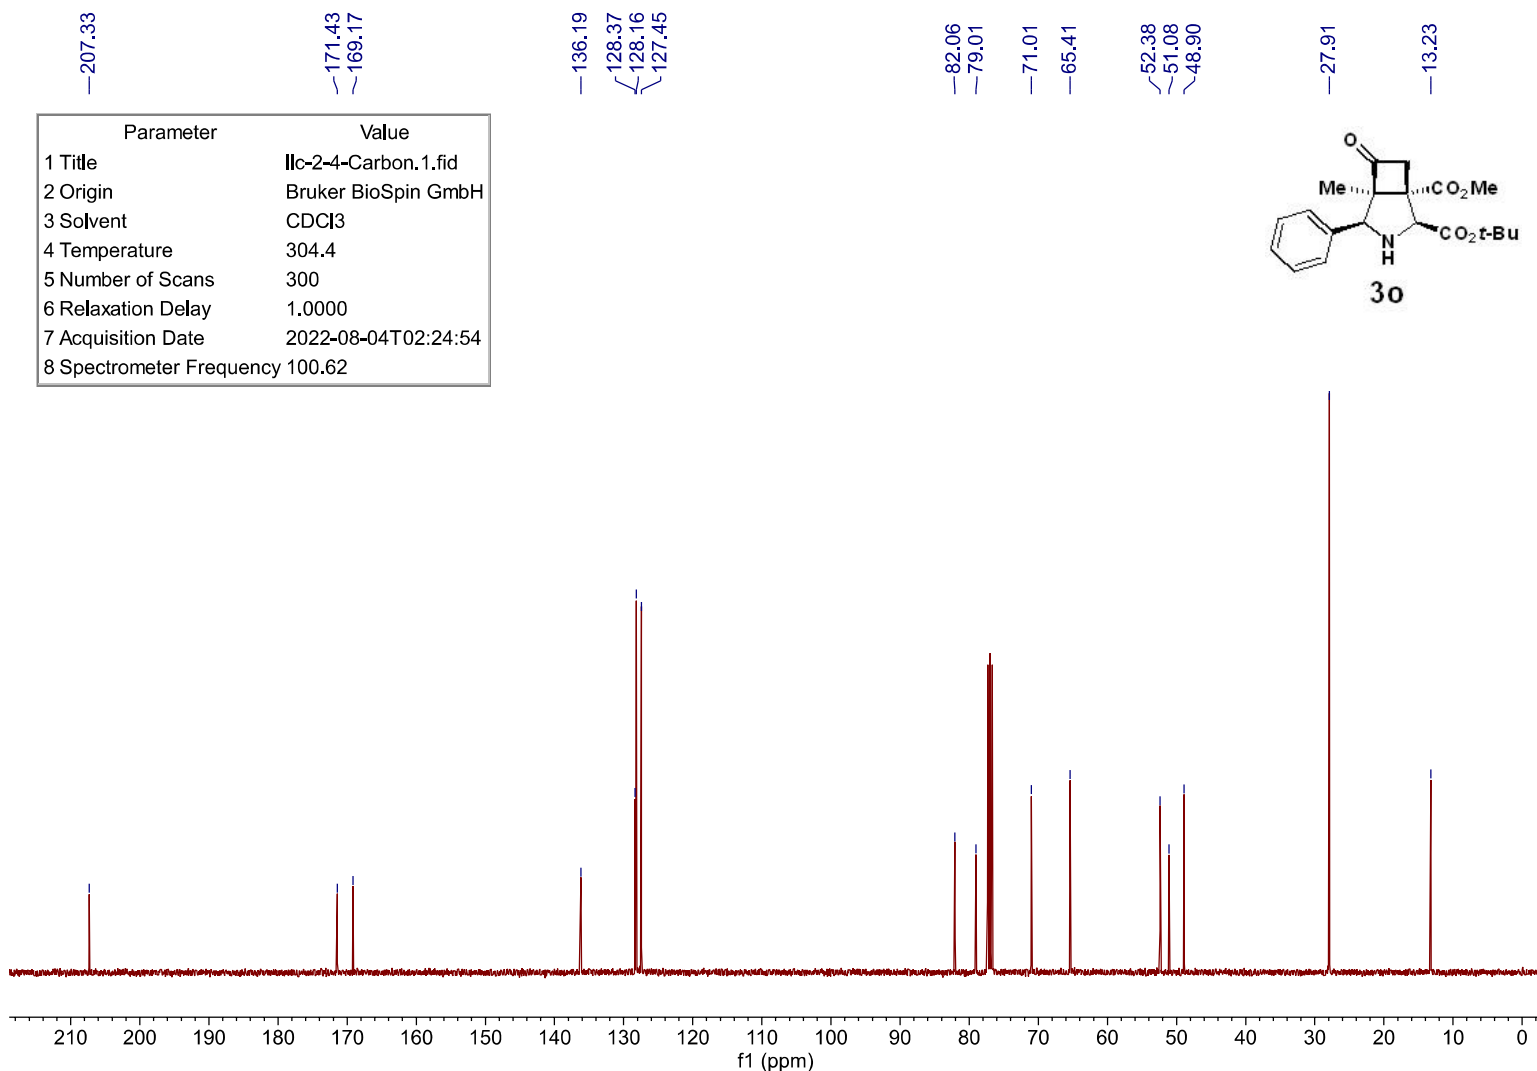

| Parameter          | Value               |
|--------------------|---------------------|
| 1 Title            | llc-1-80-p.1.fid    |
| 2 Origin           | Bruker BioSpin GmbH |
| 3 Solvent          | CDCl3               |
| 4 Temperature      | 296.8               |
| 5 Number of Scans  | 4                   |
| 6 Relaxation Delay | 5.0000              |
| 7 Acquisition Date | 2021-10-30T21:02:23 |
| 8 Spectrometer     | 400.13              |
| Frequency          |                     |

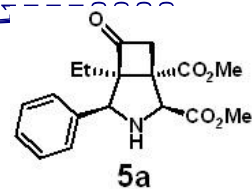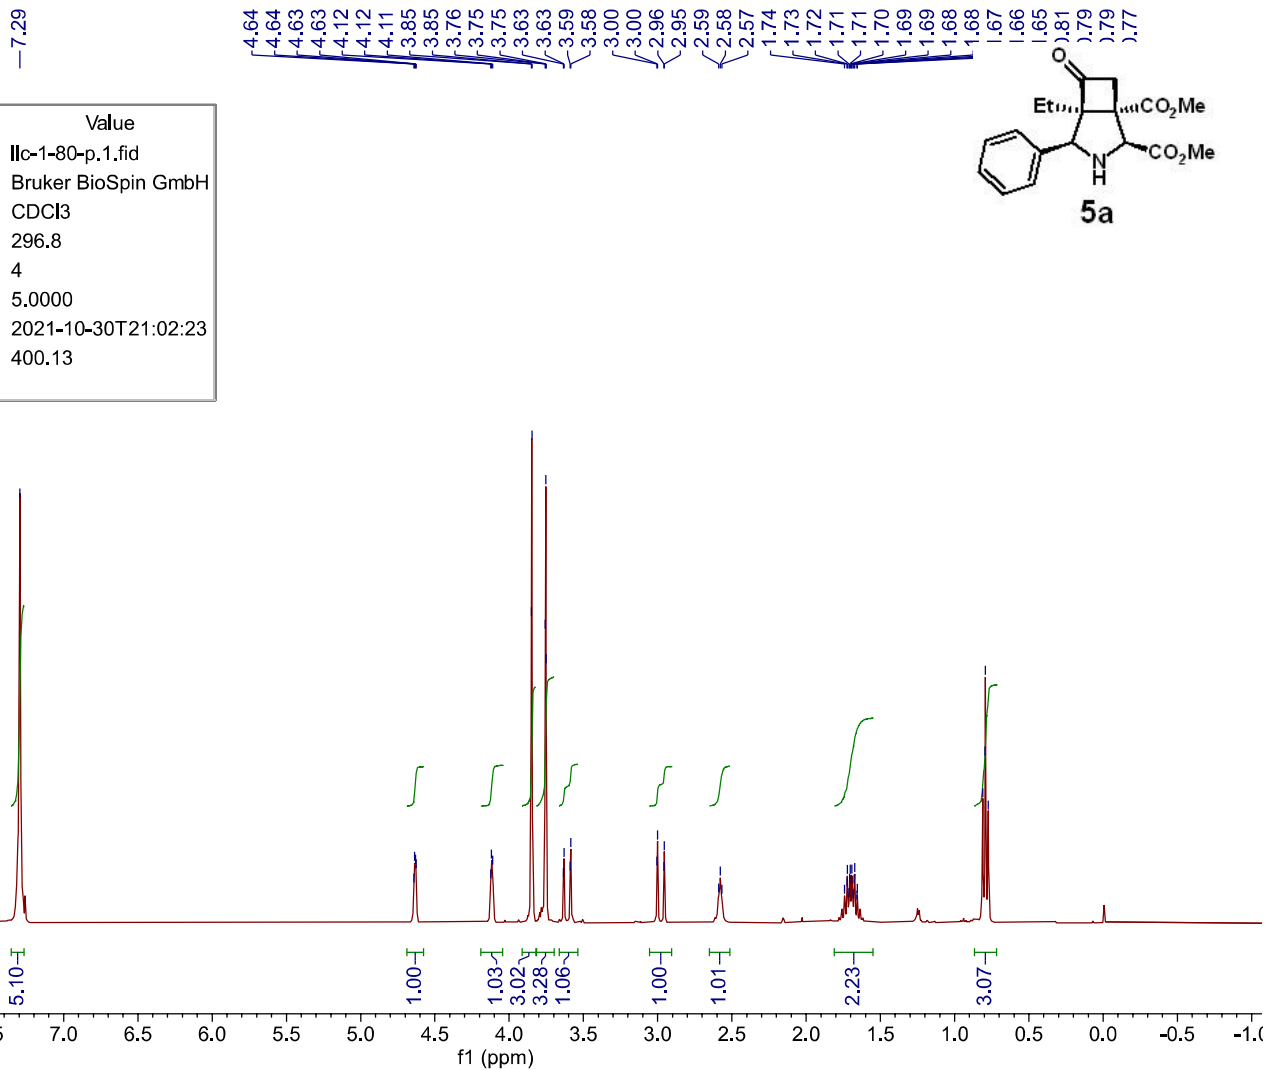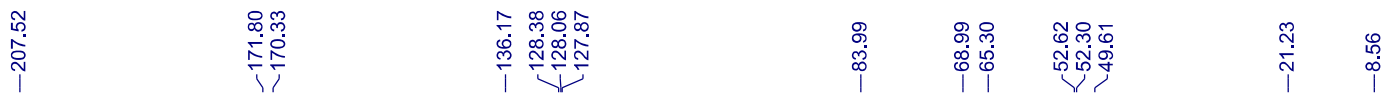

| Parameter          | Value                 |
|--------------------|-----------------------|
| 1 Title            | llc-1-80-carbon.1.fid |
| 2 Origin           | Bruker BioSpin GmbH   |
| 3 Solvent          | CDCl3                 |
| 4 Temperature      | 297.3                 |
| 5 Number of Scans  | 300                   |
| 6 Relaxation Delay | 1.0000                |
| 7 Acquisition Date | 2021-10-31T00:57:09   |
| 8 Spectrometer     | 100.62                |
| Frequency          |                       |

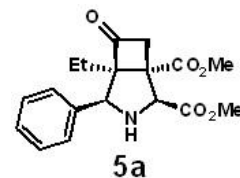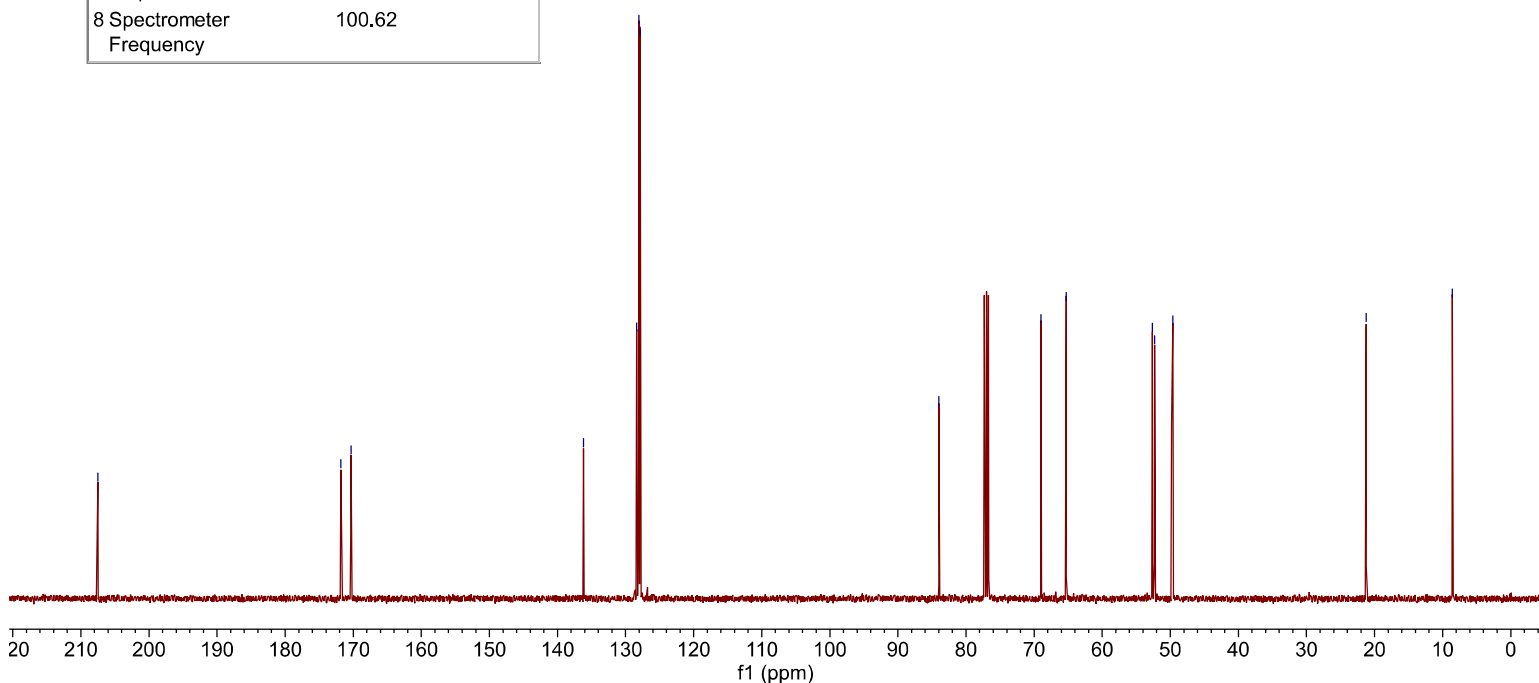



7.30  
7.29  
7.29  
7.28  
7.27  
7.26  
7.26  
7.22  
7.21  
7.21  
7.20  
7.19  
7.18  
7.17  
7.17  
7.15  
7.06  
7.06  
7.04  
7.04

4.67  
4.66  
4.23  
4.22  
3.75  
3.74  
3.63  
3.62  
3.42  
3.37  
3.14  
3.10  
2.99  
2.97  
2.94  
2.93  
2.59

1.56

| Parameter                | Value               |
|--------------------------|---------------------|
| 1 Title                  | llc-2-23-ap2.1.fid  |
| 2 Origin                 | Bruker BioSpin GmbH |
| 3 Solvent                | CDCl3               |
| 4 Temperature            | 300.4               |
| 5 Number of Scans        | 4                   |
| 6 Relaxation Delay       | 5.0000              |
| 7 Acquisition Date       | 2022-08-29T21:16:15 |
| 8 Spectrometer Frequency | 400.13              |

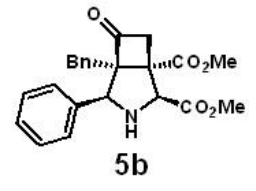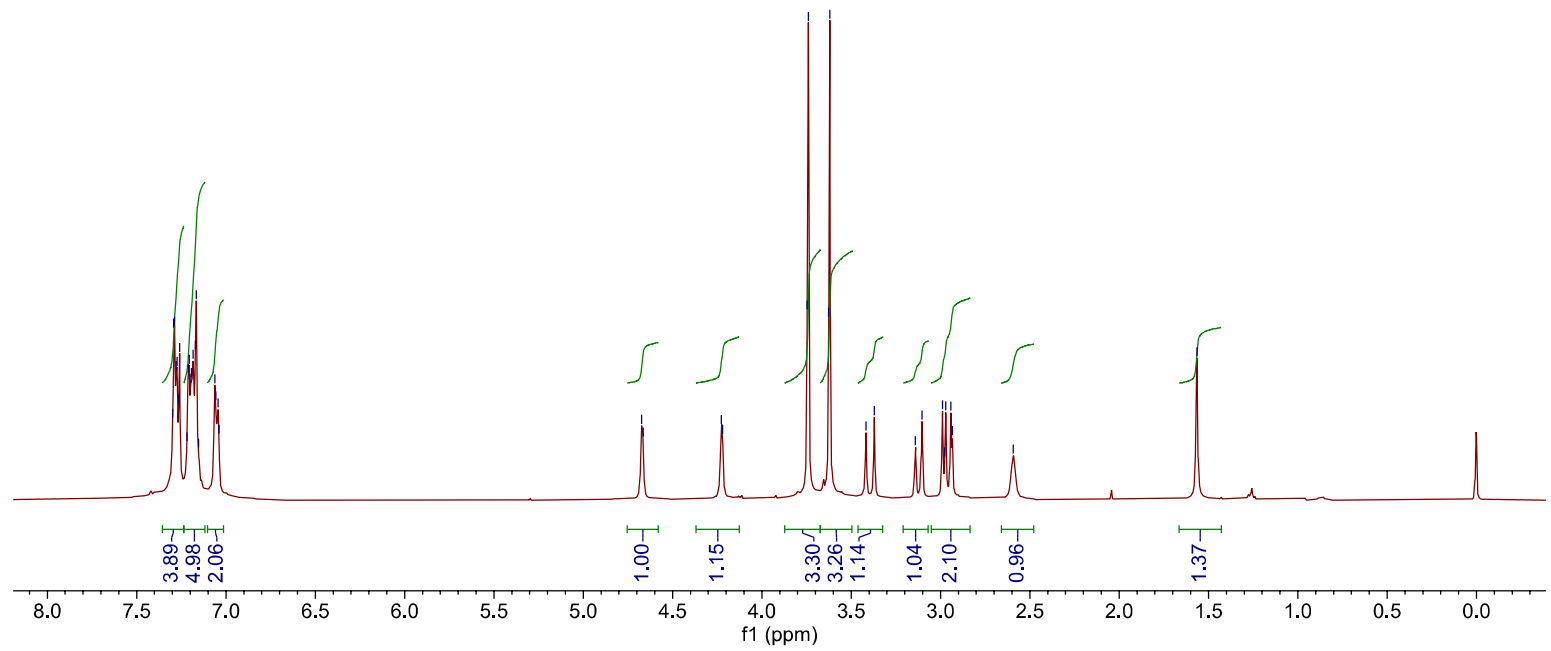

207.36

171.58  
170.24

136.01  
135.31  
130.37  
128.39  
128.21  
128.04  
128.02  
126.77

83.60

70.28  
65.80

52.46  
52.31  
50.38  
50.00

35.23

| Parameter                | Value               |
|--------------------------|---------------------|
| 1 Title                  | llc-2-24-ap2.2.fid  |
| 2 Origin                 | Bruker BioSpin GmbH |
| 3 Solvent                | CDCl3               |
| 4 Temperature            | 300.6               |
| 5 Number of Scans        | 300                 |
| 6 Relaxation Delay       | 1.0000              |
| 7 Acquisition Date       | 2022-08-29T21:40:52 |
| 8 Spectrometer Frequency | 100.62              |

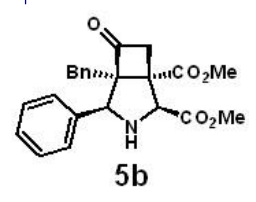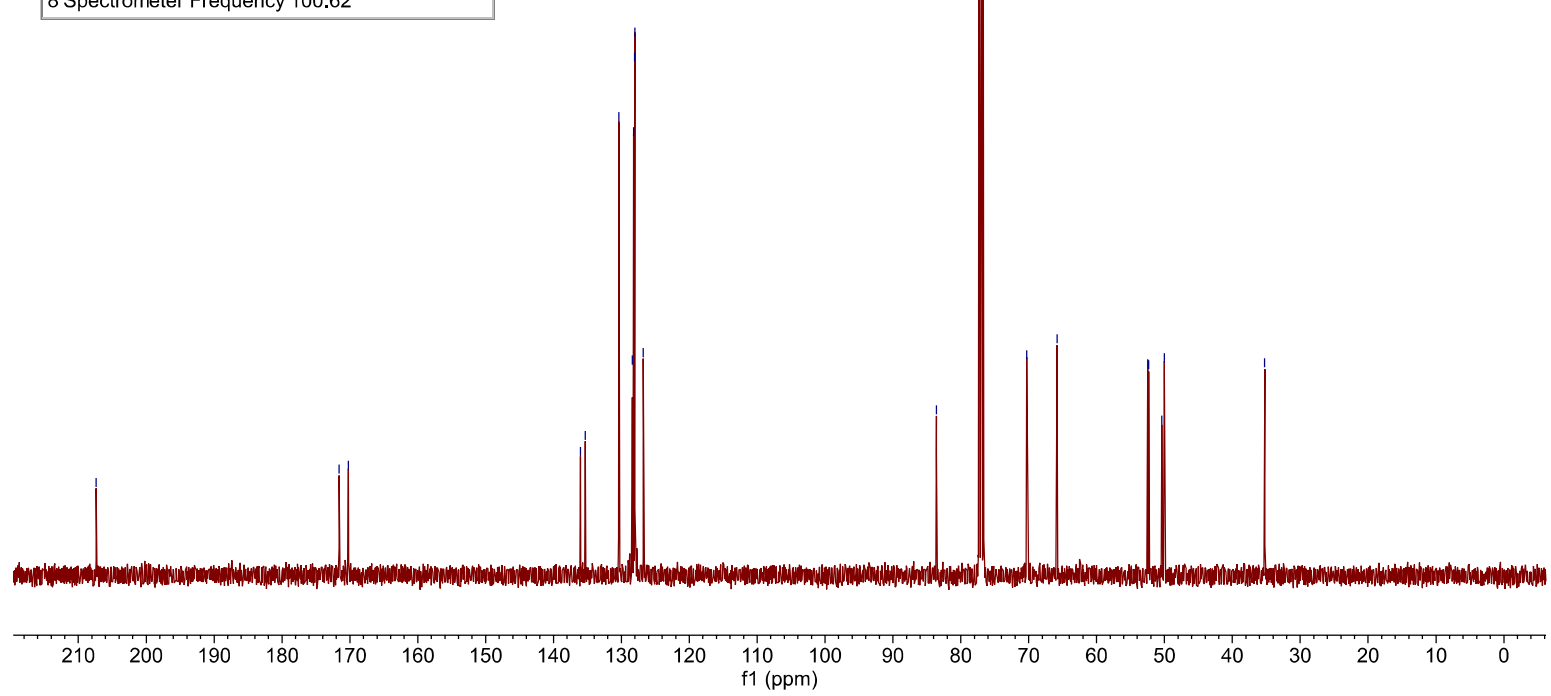

| Parameter                | Value               |
|--------------------------|---------------------|
| 1 Title                  | LLC-2-75-ap-C.1.fid |
| 2 Origin                 | Bruker BioSpin GmbH |
| 3 Solvent                | CDCl3               |
| 4 Temperature            | 300.1               |
| 5 Number of Scans        | 300                 |
| 6 Relaxation Delay       | 1.0000              |
| 7 Acquisition Date       | 2022-09-23T17:02:44 |
| 8 Spectrometer Frequency | 100.62              |

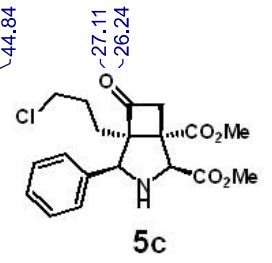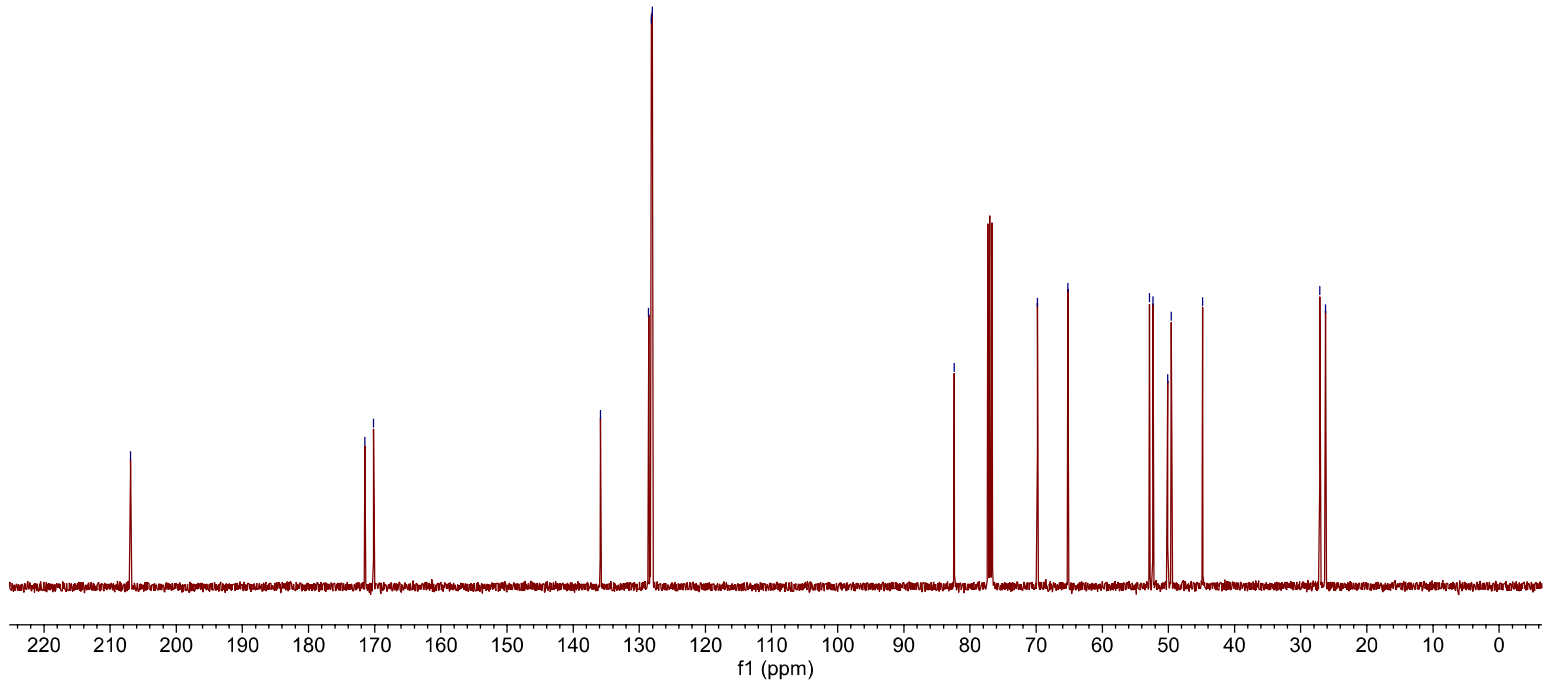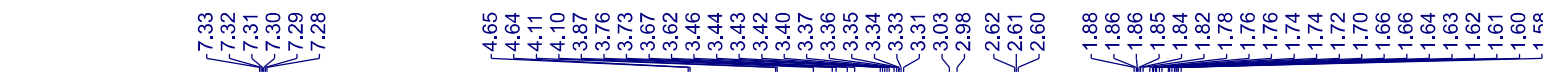

| Parameter                | Value               |
|--------------------------|---------------------|
| 1 Title                  | LLC-2-75-ap.1.fid   |
| 2 Origin                 | Bruker BioSpin GmbH |
| 3 Solvent                | CDCl3               |
| 4 Temperature            | 299.6               |
| 5 Number of Scans        | 4                   |
| 6 Relaxation Delay       | 5.0000              |
| 7 Acquisition Date       | 2022-09-23T16:50:22 |
| 8 Spectrometer Frequency | 400.13              |

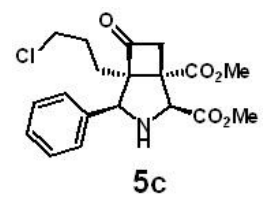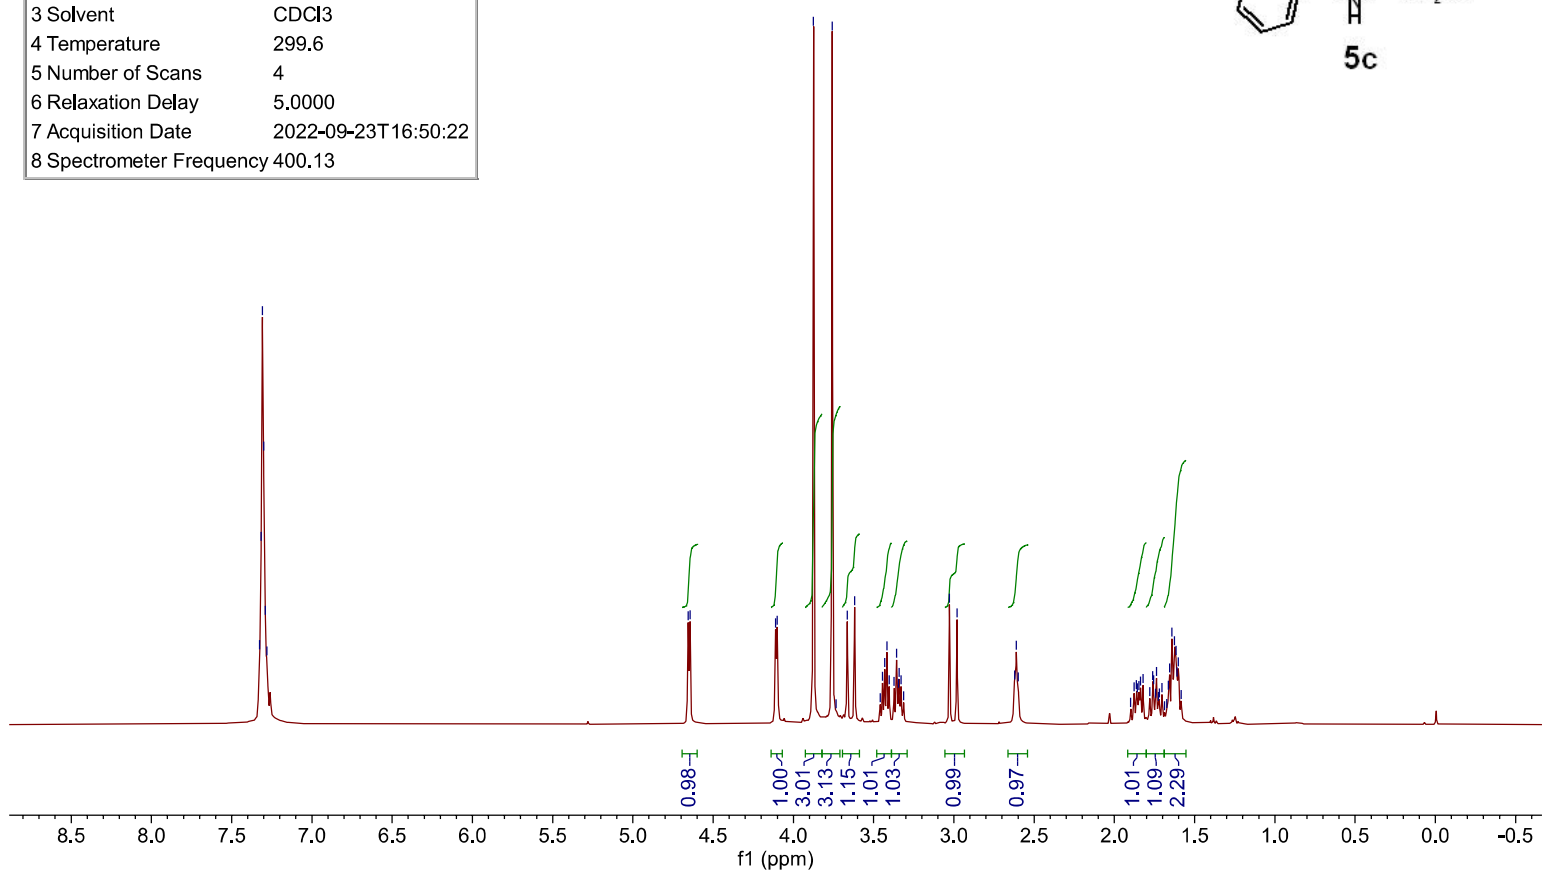

7.23  
7.23  
7.22  
7.22  
7.21  
7.20  
7.20  
7.19  
7.18  
7.17  
7.16  
7.16  
7.15  
7.15  
7.14  
7.14  
7.12  
7.11  
7.10  
7.09  
7.09  
7.08  
6.92  
6.90

| Parameter                | Value               |
|--------------------------|---------------------|
| 1 Title                  | llc-1-138-p-H.1.fid |
| 2 Origin                 | Bruker BioSpin GmbH |
| 3 Solvent                | CDCl3               |
| 4 Temperature            | 301.5               |
| 5 Number of Scans        | 4                   |
| 6 Relaxation Delay       | 5.0000              |
| 7 Acquisition Date       | 2022-03-13T00:49:23 |
| 8 Spectrometer Frequency | 400.13              |

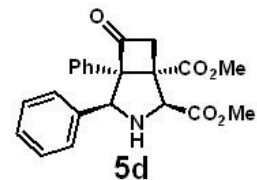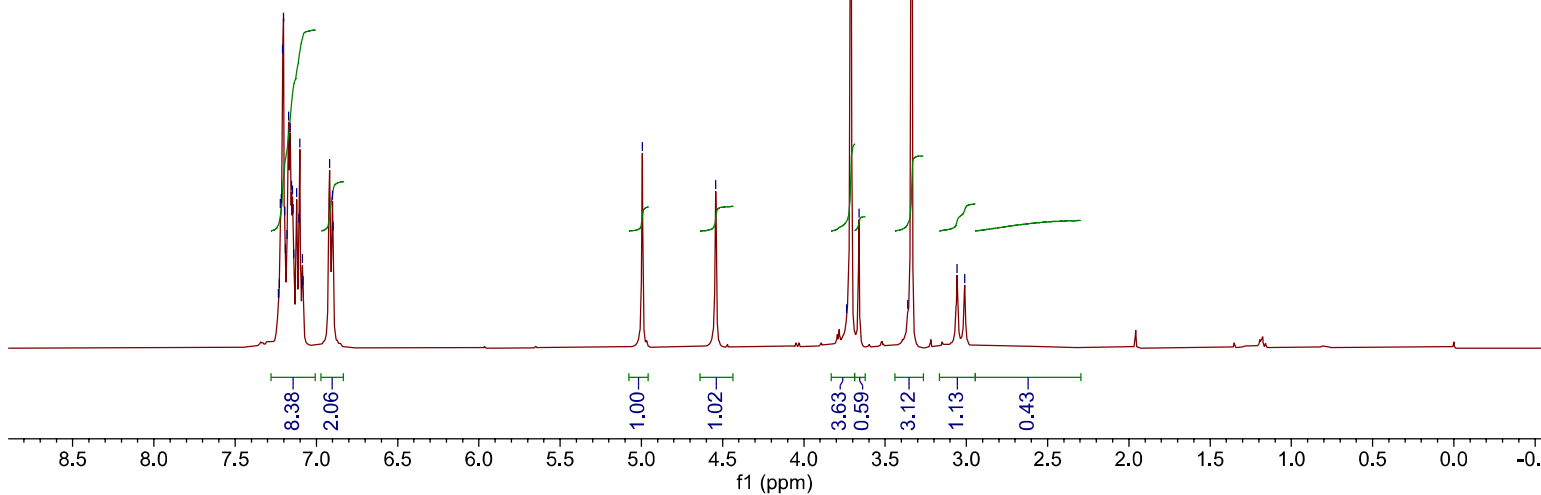

204.47

170.69  
170.08

135.11  
134.29  
128.41  
128.23  
127.87  
127.84  
126.95  
126.50

86.17

72.96

64.39

53.76  
52.43  
52.21  
50.10

| Parameter                | Value               |
|--------------------------|---------------------|
| 1 Title                  | llc-1-138-p-C.1.fid |
| 2 Origin                 | Bruker BioSpin GmbH |
| 3 Solvent                | CDCl3               |
| 4 Temperature            | 302.2               |
| 5 Number of Scans        | 300                 |
| 6 Relaxation Delay       | 1.0000              |
| 7 Acquisition Date       | 2022-03-13T01:01:45 |
| 8 Spectrometer Frequency | 100.62              |

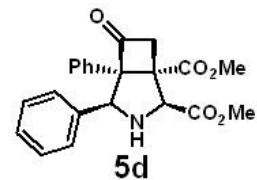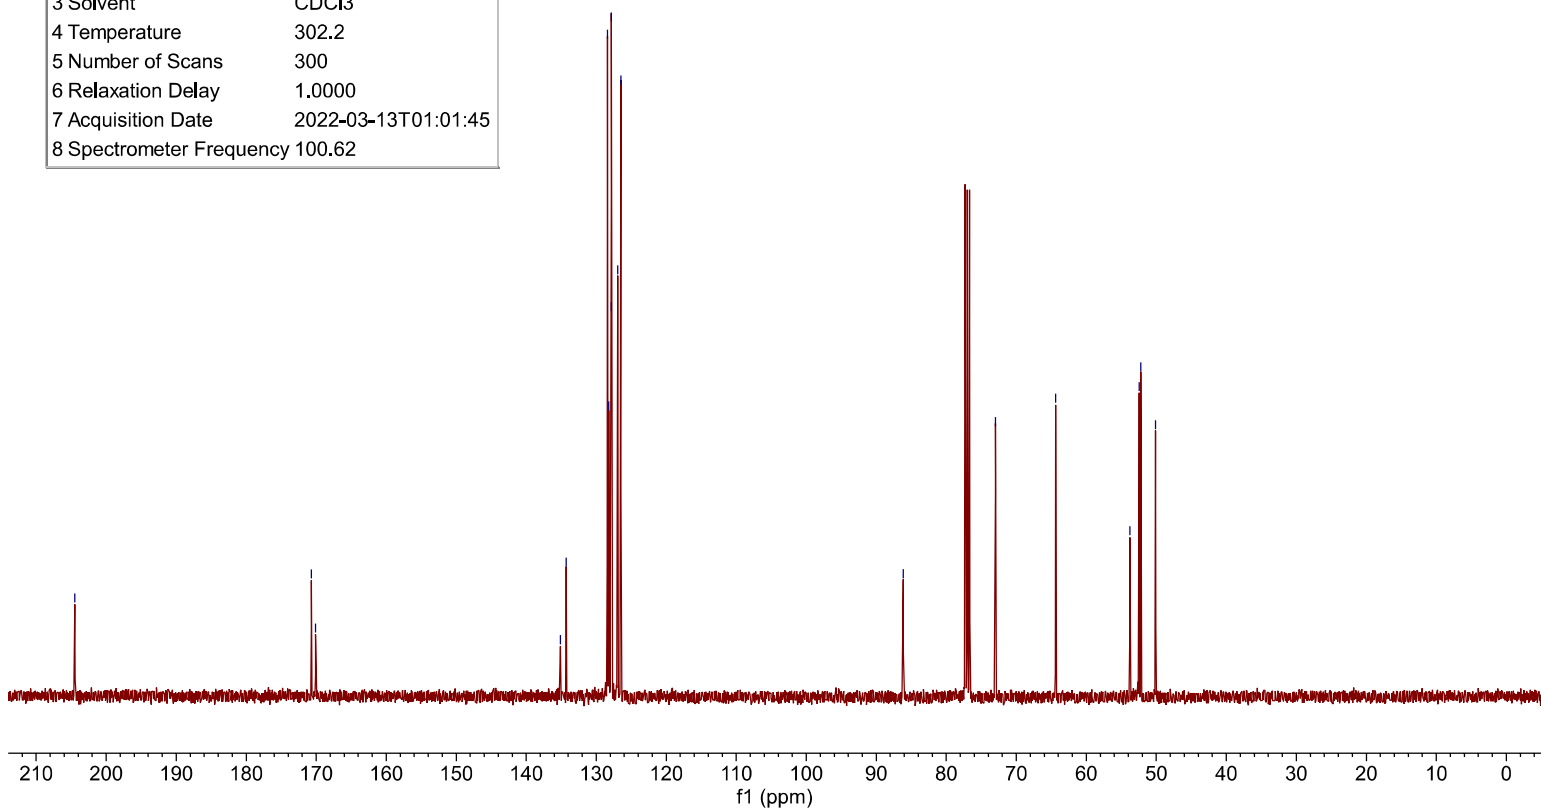

7.60  
7.60  
7.58  
7.53  
7.45  
7.43  
7.41  
7.36  
7.35  
7.34  
7.32  
7.30  
7.24  
7.23  
7.22  
7.21  
7.19  
7.17  
7.02  
7.00

5.06  
5.05

4.61

3.80  
3.78  
3.75  
3.44  
3.11  
3.07  
2.78  
2.77

| Parameter                | Value               |
|--------------------------|---------------------|
| 1 Title                  | LLC-2-60-ap-H.1.fid |
| 2 Origin                 | Bruker BioSpin GmbH |
| 3 Solvent                | CDCl3               |
| 4 Temperature            | 300.3               |
| 5 Number of Scans        | 4                   |
| 6 Relaxation Delay       | 5.0000              |
| 7 Acquisition Date       | 2022-09-13T20:42:36 |
| 8 Spectrometer Frequency | 400.13              |

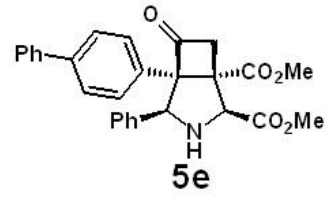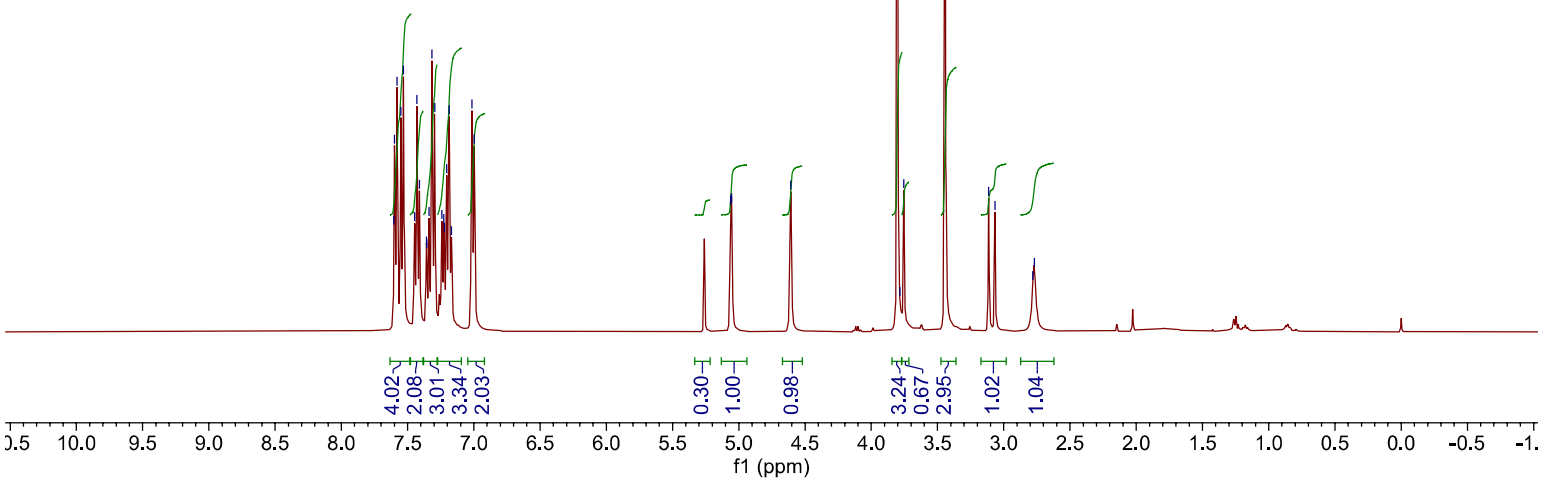

204.62

170.81  
170.28

140.41  
140.11  
135.37  
133.32  
128.80  
128.25  
127.89  
126.98  
126.91  
126.88

86.08

72.97

64.46

53.85  
52.45  
52.31  
50.09

| Parameter                | Value               |
|--------------------------|---------------------|
| 1 Title                  | LLC-2-59-ap-C.1.fid |
| 2 Origin                 | Bruker BioSpin GmbH |
| 3 Solvent                | CDCl3               |
| 4 Temperature            | 300.6               |
| 5 Number of Scans        | 300                 |
| 6 Relaxation Delay       | 1.0000              |
| 7 Acquisition Date       | 2022-09-13T20:38:46 |
| 8 Spectrometer Frequency | 100.62              |

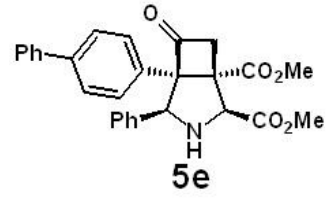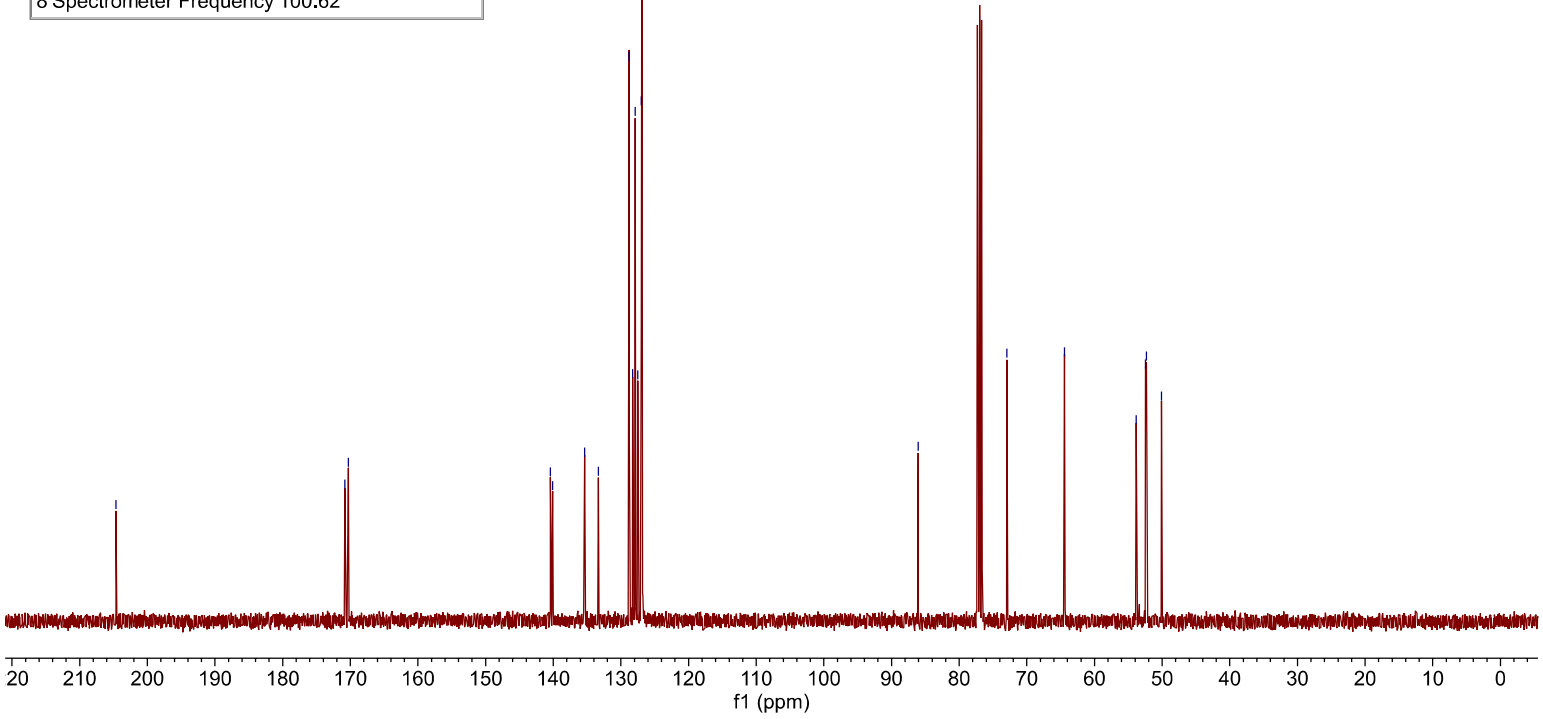

7.32  
7.31

4.29

3.79

3.78

3.57

3.52

3.25

3.20

2.37

1.76

1.23

| Parameter                | Value               |
|--------------------------|---------------------|
| 1 Title                  | llc-1-114.1.fid     |
| 2 Origin                 | Bruker BioSpin GmbH |
| 3 Solvent                | CDCl3               |
| 4 Temperature            | 295.4               |
| 5 Number of Scans        | 4                   |
| 6 Relaxation Delay       | 5.0000              |
| 7 Acquisition Date       | 2022-02-11T00:46:52 |
| 8 Spectrometer Frequency | 400.13              |

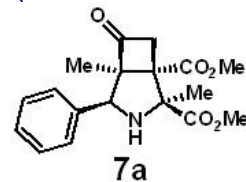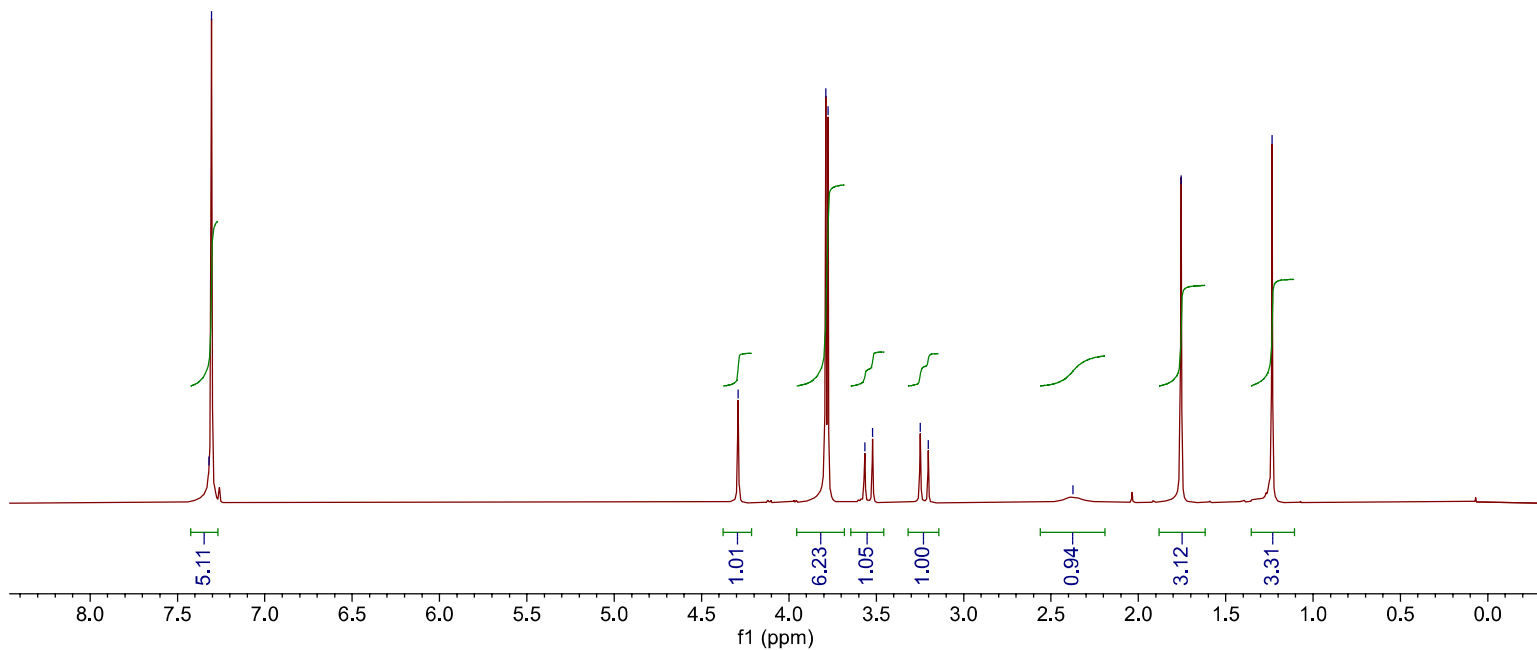

206.83

173.22

170.53

136.57

128.43

128.26

127.18

78.47

69.93

68.31

53.56

53.22

52.45

52.13

99

32

| Parameter                | Value                  |
|--------------------------|------------------------|
| 1 Title                  | llc-1-114-carbon.1.fid |
| 2 Origin                 | Bruker BioSpin GmbH    |
| 3 Solvent                | CDCl3                  |
| 4 Temperature            | 296.0                  |
| 5 Number of Scans        | 300                    |
| 6 Relaxation Delay       | 1.0000                 |
| 7 Acquisition Date       | 2022-02-11T01:30:54    |
| 8 Spectrometer Frequency | 100.62                 |

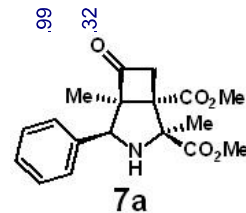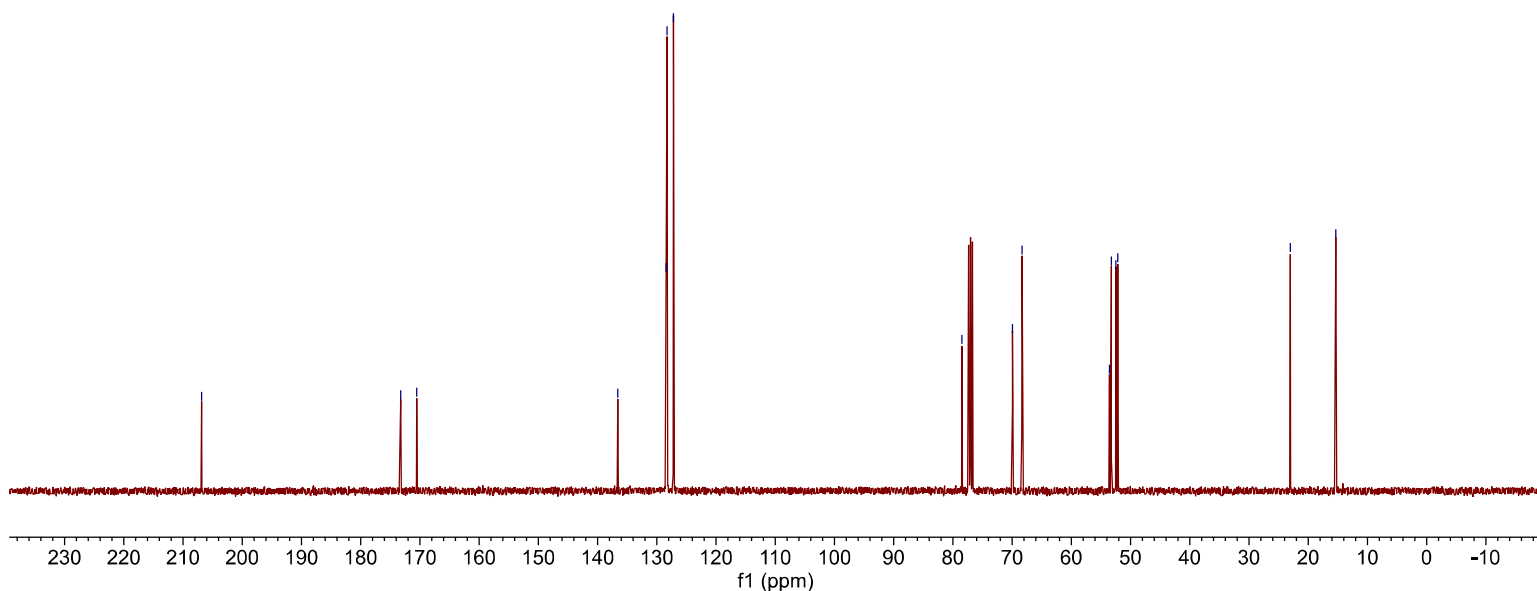

| Parameter                | Value               |
|--------------------------|---------------------|
| 1 Title                  | llc-2-45-H.1.fid    |
| 2 Origin                 | Bruker BioSpin GmbH |
| 3 Solvent                | CDCl3               |
| 4 Temperature            | 300.2               |
| 5 Number of Scans        | 4                   |
| 6 Relaxation Delay       | 5.0000              |
| 7 Acquisition Date       | 2022-09-01T01:05:47 |
| 8 Spectrometer Frequency | 400.13              |

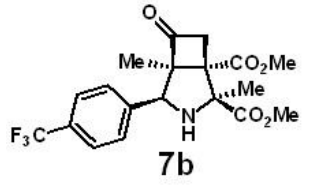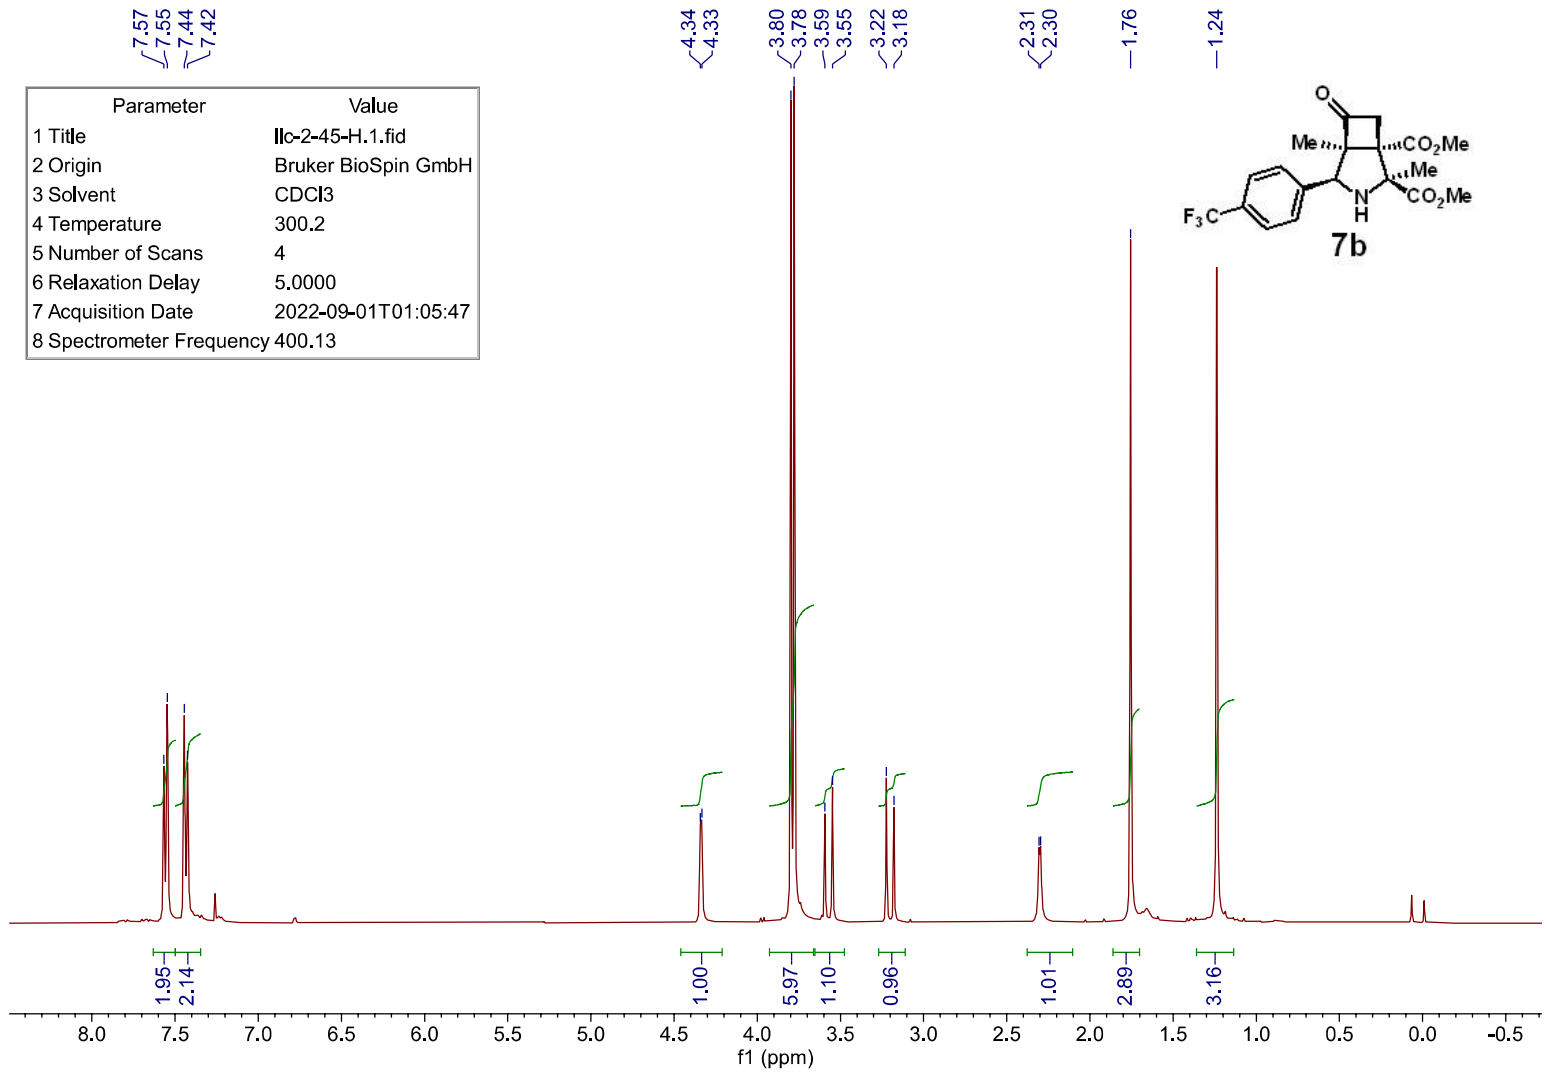

| Parameter                | Value               |
|--------------------------|---------------------|
| 1 Title                  | llc-2-45-C.1.fid    |
| 2 Origin                 | Bruker BioSpin GmbH |
| 3 Solvent                | CDCl3               |
| 4 Temperature            | 300.7               |
| 5 Number of Scans        | 300                 |
| 6 Relaxation Delay       | 1.0000              |
| 7 Acquisition Date       | 2022-09-01T01:18:14 |
| 8 Spectrometer Frequency | 100.62              |

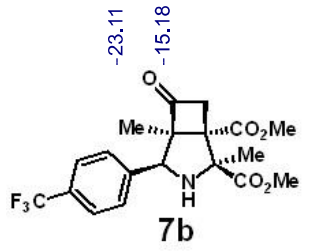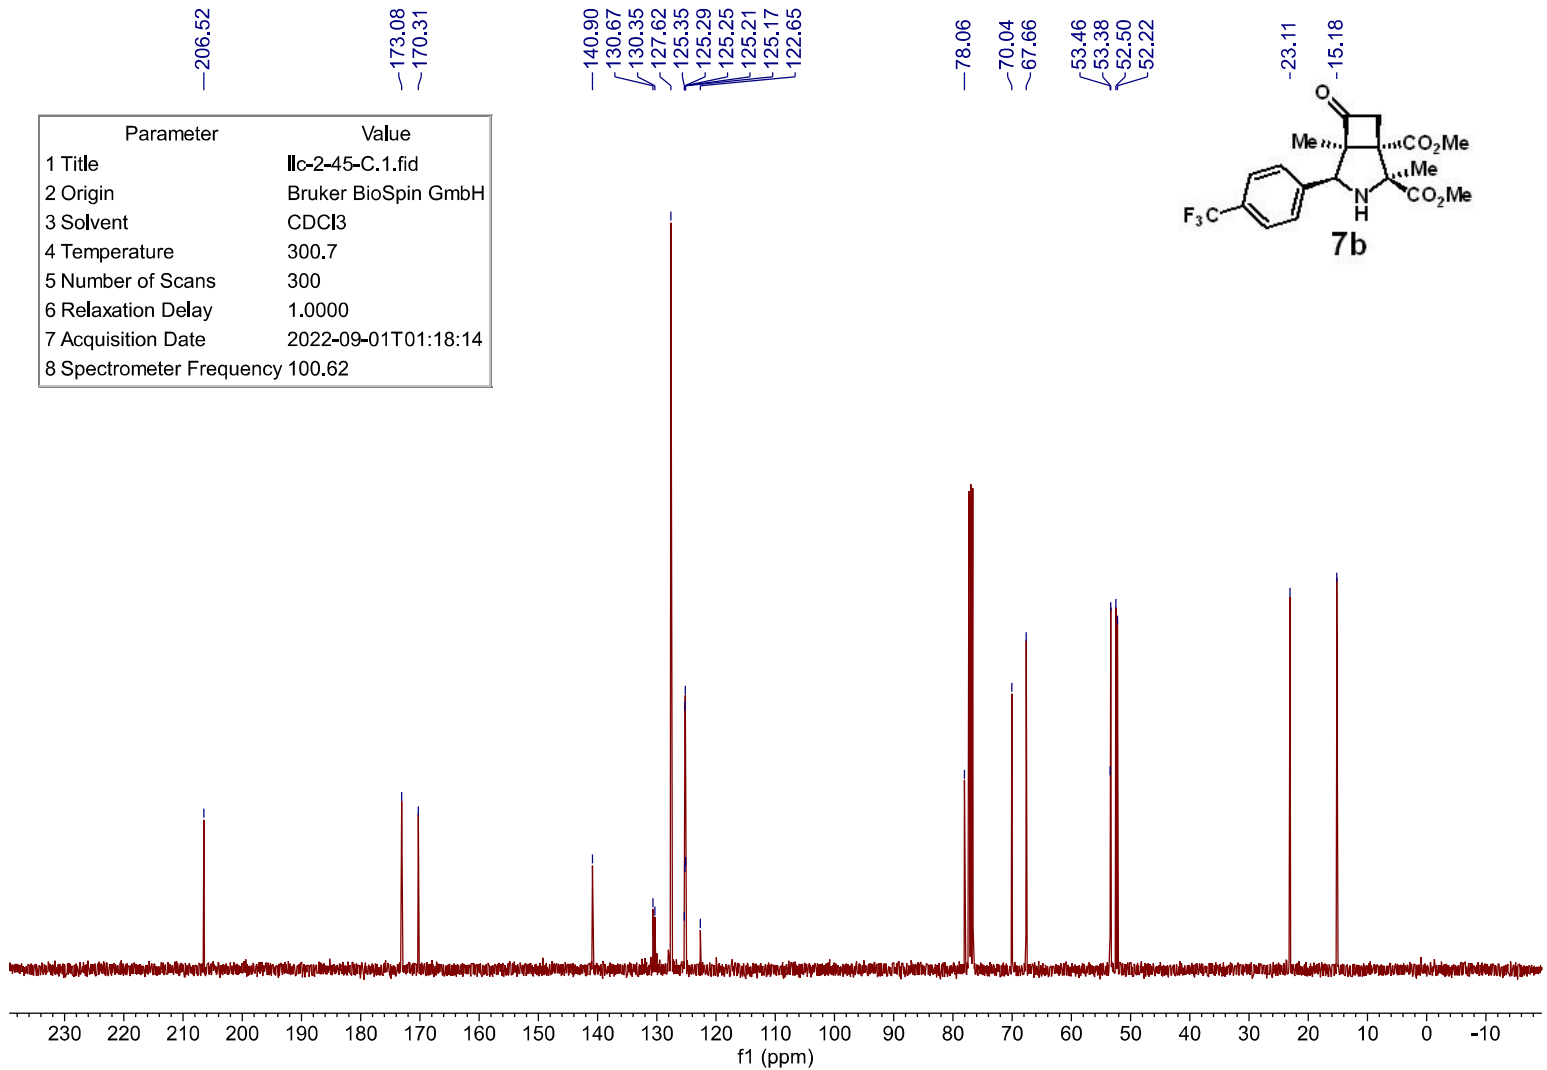

| Parameter                | Value               |
|--------------------------|---------------------|
| 1 Title                  | llc-2-46-F.1.fid    |
| 2 Origin                 | Bruker BioSpin GmbH |
| 3 Solvent                | CDCl3               |
| 4 Temperature            | 300.4               |
| 5 Number of Scans        | 16                  |
| 6 Relaxation Delay       | 1.0000              |
| 7 Acquisition Date       | 2022-09-01T02:50:25 |
| 8 Spectrometer Frequency | 376.46              |

-62.54

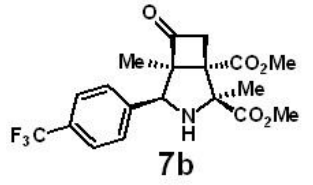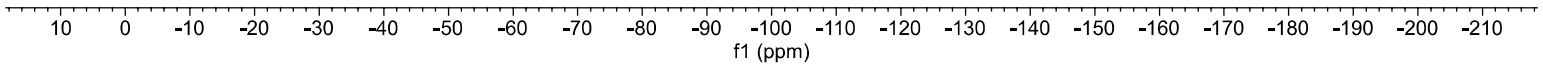

| Parameter                | Value               |
|--------------------------|---------------------|
| 1 Title                  | llc-2-103-3.1.fid   |
| 2 Origin                 | Bruker BioSpin GmbH |
| 3 Solvent                | CDCl3               |
| 4 Temperature            | 297.3               |
| 5 Number of Scans        | 4                   |
| 6 Relaxation Delay       | 5.0000              |
| 7 Acquisition Date       | 2022-10-06T03:32:47 |
| 8 Spectrometer Frequency | 400.13              |

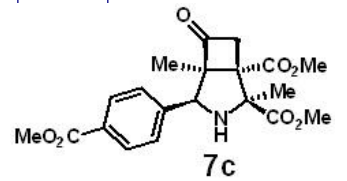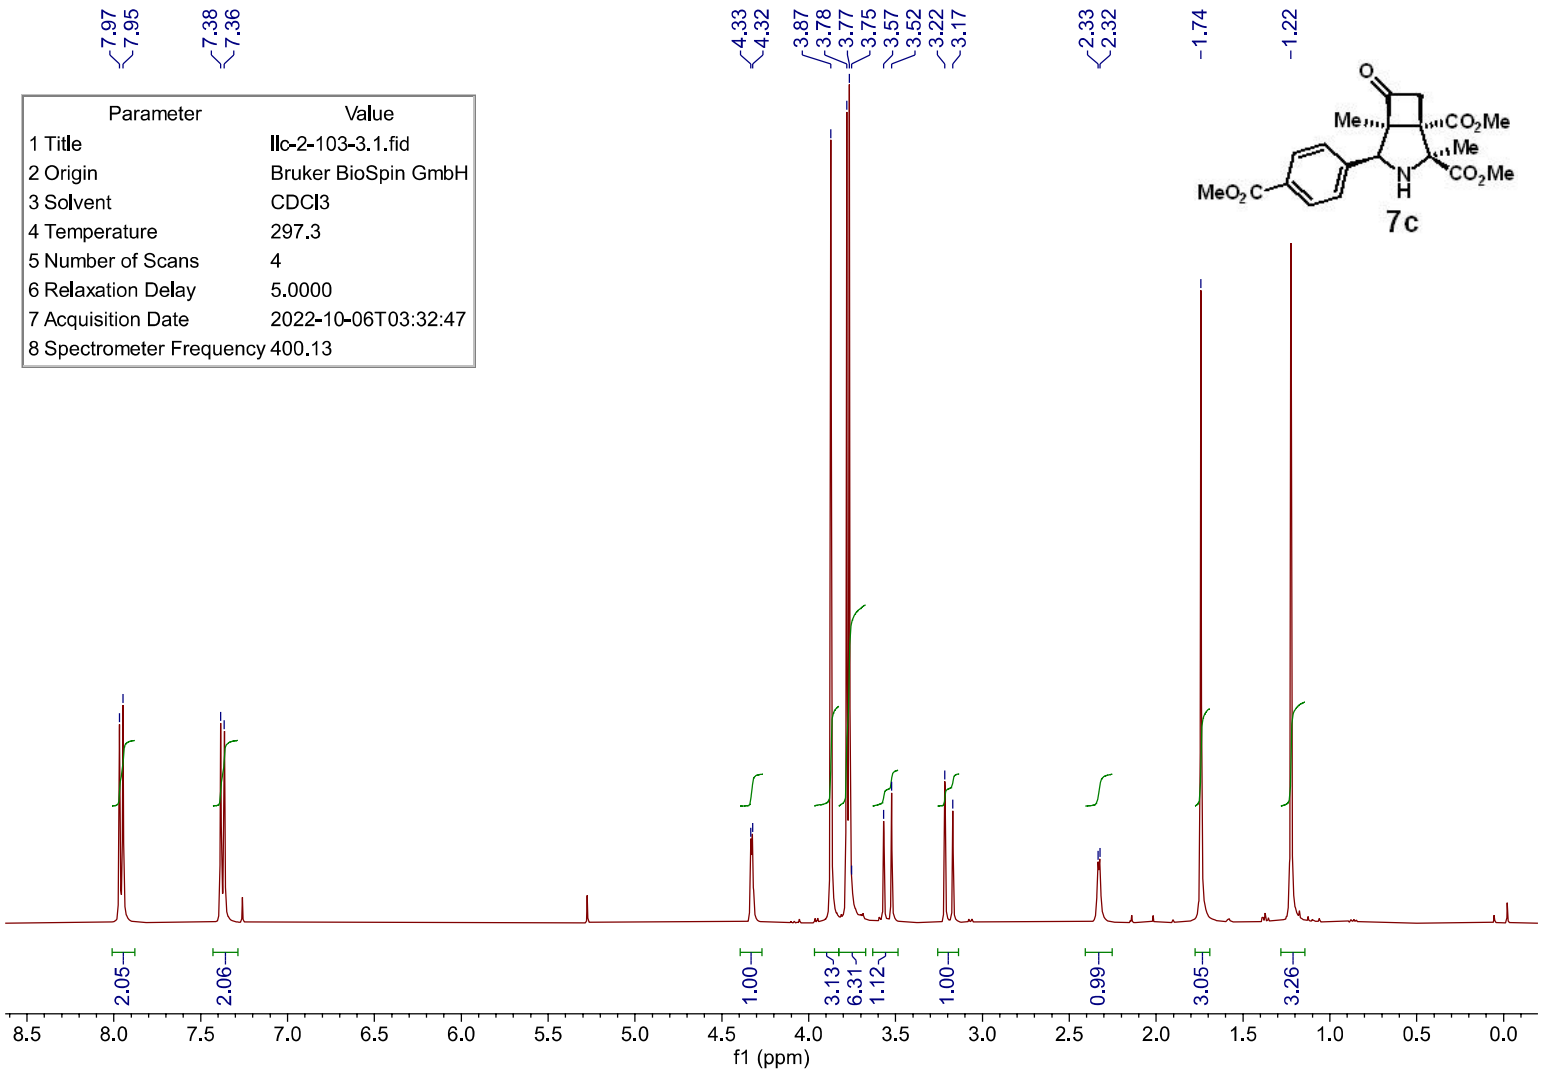

| Parameter                | Value               |
|--------------------------|---------------------|
| 1 Title                  | LLC-2-102-b-C.1.fid |
| 2 Origin                 | Bruker BioSpin GmbH |
| 3 Solvent                | CDCl3               |
| 4 Temperature            | 298.1               |
| 5 Number of Scans        | 300                 |
| 6 Relaxation Delay       | 1.0000              |
| 7 Acquisition Date       | 2022-10-06T01:08:25 |
| 8 Spectrometer Frequency | 100.62              |

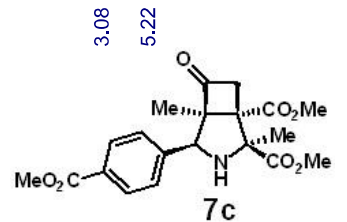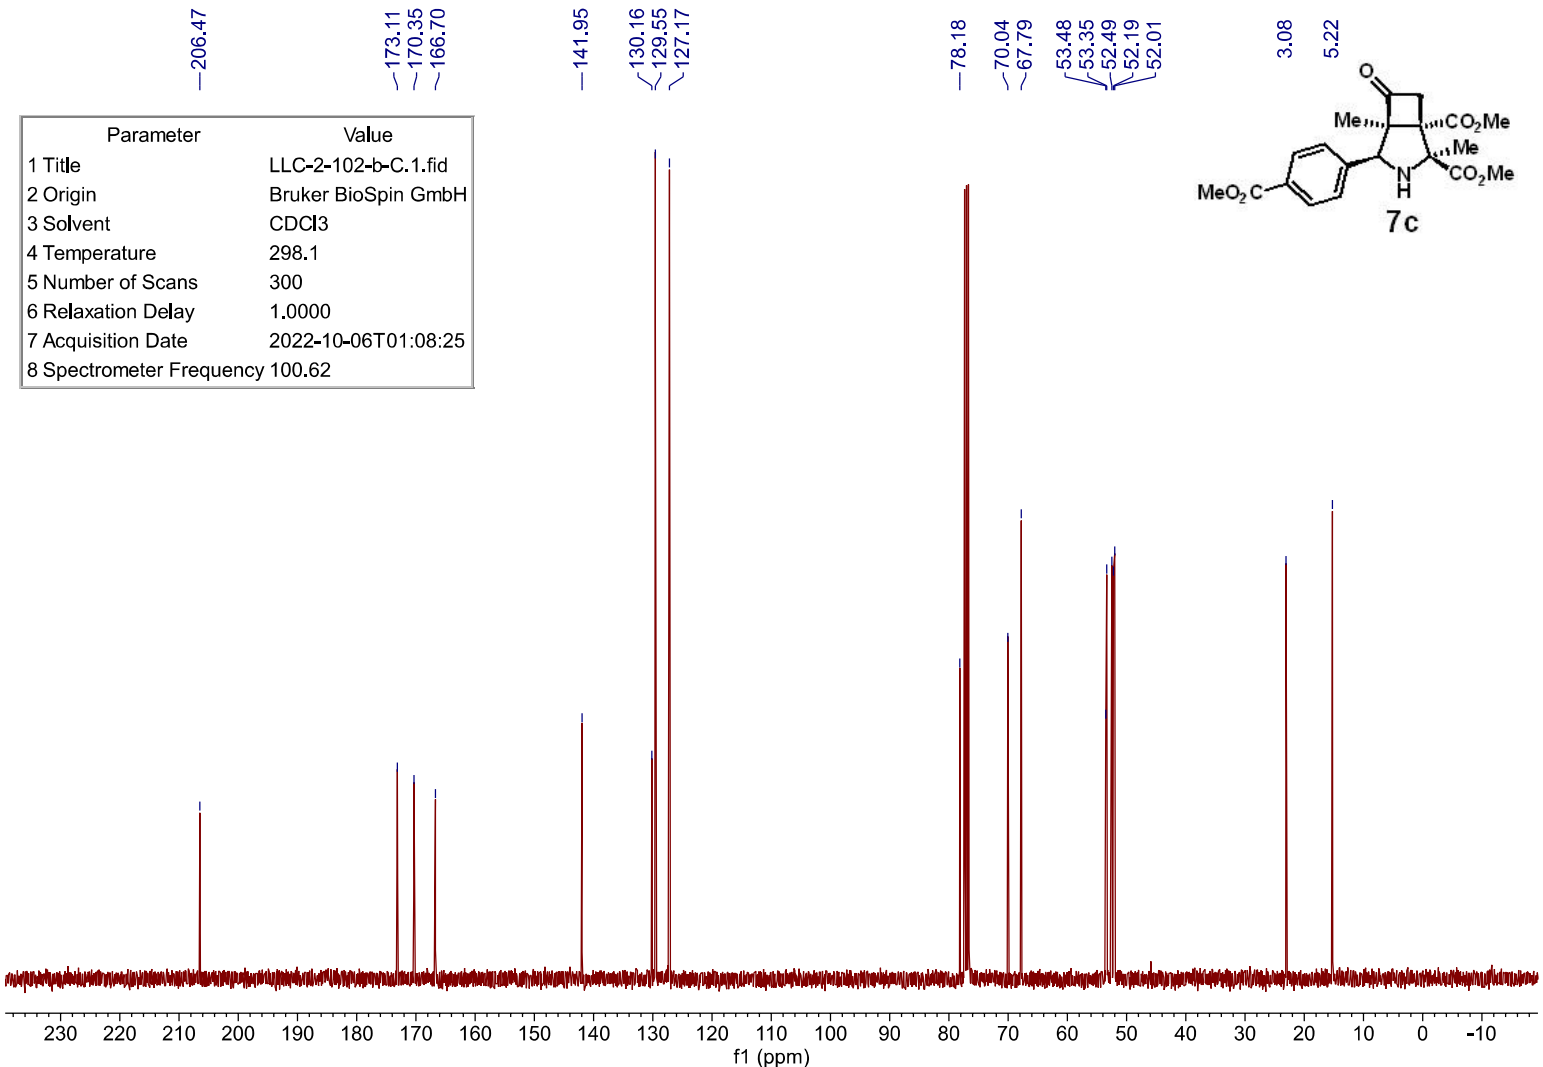



7.41  
7.41  
7.38  
7.36  
7.17  
7.16  
7.15  
7.14

4.24  
4.23

3.80  
3.78  
3.60  
3.55

3.20  
3.15

2.24  
2.23  
2.23

1.74

1.22

| Parameter                | Value               |
|--------------------------|---------------------|
| 1 Title                  | llc-2-48-ap-H.1.fid |
| 2 Origin                 | Bruker BioSpin GmbH |
| 3 Solvent                | CDCl3               |
| 4 Temperature            | 299.8               |
| 5 Number of Scans        | 4                   |
| 6 Relaxation Delay       | 5.0000              |
| 7 Acquisition Date       | 2022-09-05T17:49:05 |
| 8 Spectrometer Frequency | 400.13              |

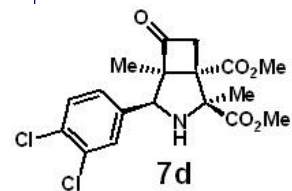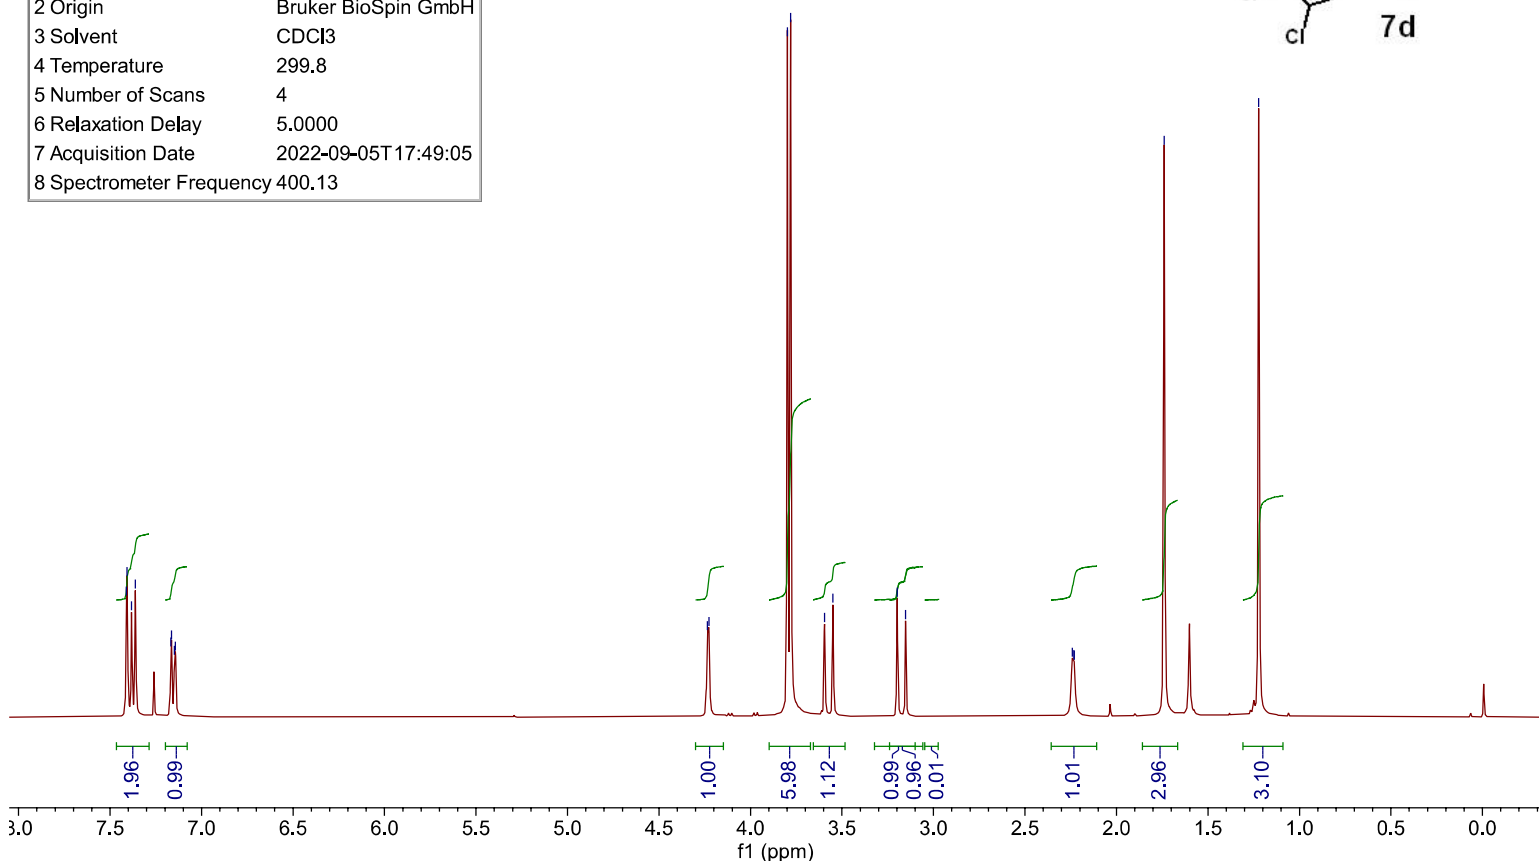

206.48

173.01  
170.24

137.20  
132.48  
132.31  
130.25  
129.09  
126.49

77.82

69.95  
66.96

53.44  
53.33  
52.51  
52.24

3.15

15.16

| Parameter                | Value               |
|--------------------------|---------------------|
| 1 Title                  | llc-2-49-C.1.fid    |
| 2 Origin                 | Bruker BioSpin GmbH |
| 3 Solvent                | CDCl3               |
| 4 Temperature            | 300.4               |
| 5 Number of Scans        | 194                 |
| 6 Relaxation Delay       | 1.0000              |
| 7 Acquisition Date       | 2022-09-01T22:33:43 |
| 8 Spectrometer Frequency | 100.62              |

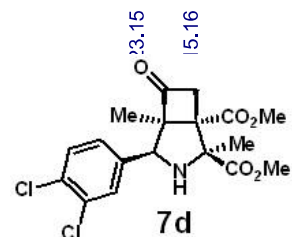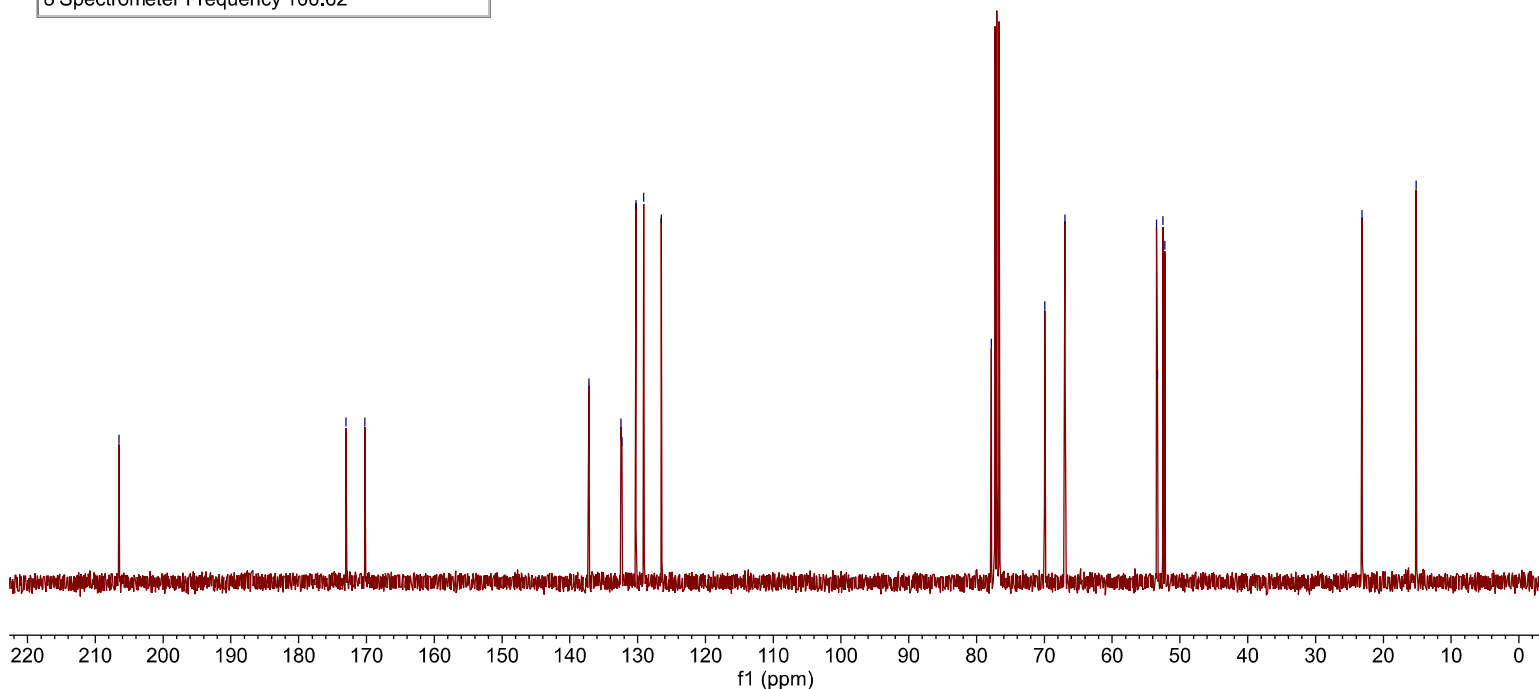

8.13  
8.11  
7.88  
7.86  
7.86  
7.81  
7.79  
7.78  
7.77  
7.52  
7.51  
7.50  
7.48  
7.48  
7.47  
7.46  
7.45  
7.43

5.36  
5.35

3.82  
3.80  
3.65  
3.61  
3.34  
3.29

2.36  
2.34

1.88

1.30

| Parameter                | Value               |
|--------------------------|---------------------|
| 1 Title                  | llc-2-17.1.fid      |
| 2 Origin                 | Bruker BioSpin GmbH |
| 3 Solvent                | CDCl3               |
| 4 Temperature            | 300.8               |
| 5 Number of Scans        | 4                   |
| 6 Relaxation Delay       | 5.0000              |
| 7 Acquisition Date       | 2022-08-09T03:39:12 |
| 8 Spectrometer Frequency | 400.13              |

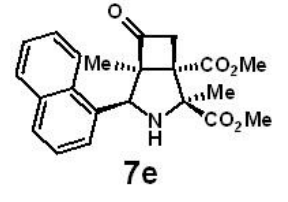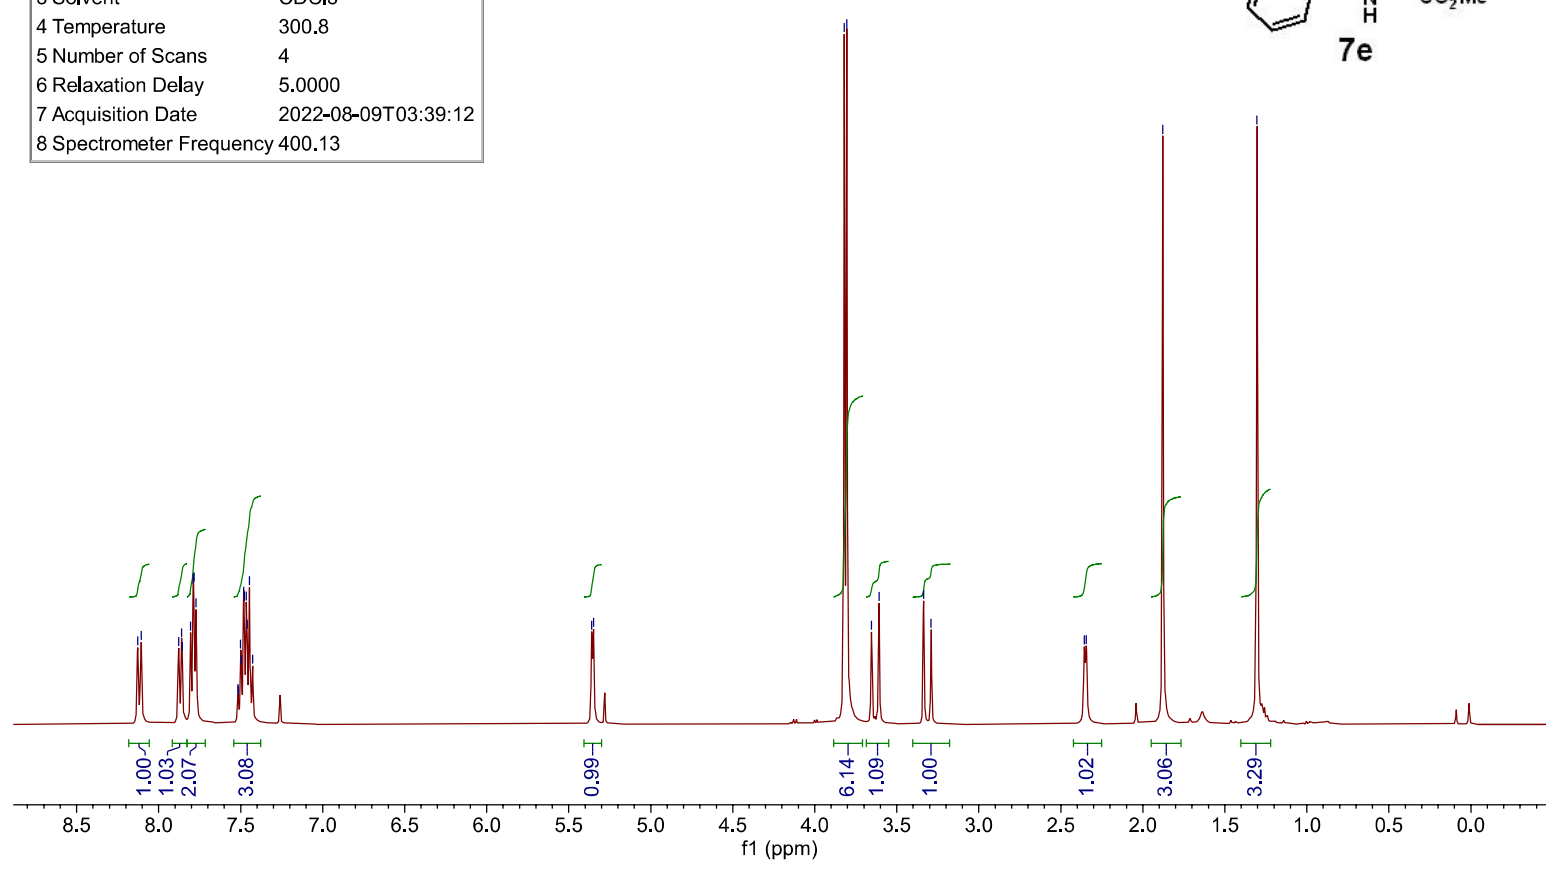

207.00

173.34  
170.47

133.87  
132.43  
131.84  
129.18  
128.67  
125.89  
125.49  
125.28  
125.22  
122.53

79.42

70.02

61.83  
53.95  
53.33  
52.44  
52.13

23.18

16.03

| Parameter                | Value                 |
|--------------------------|-----------------------|
| 1 Title                  | llc-2-17-Carbon.1.fid |
| 2 Origin                 | Bruker BioSpin GmbH   |
| 3 Solvent                | CDCl3                 |
| 4 Temperature            | 303.5                 |
| 5 Number of Scans        | 400                   |
| 6 Relaxation Delay       | 1.0000                |
| 7 Acquisition Date       | 2022-08-09T12:09:16   |
| 8 Spectrometer Frequency | 100.62                |

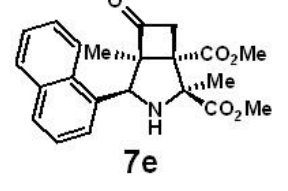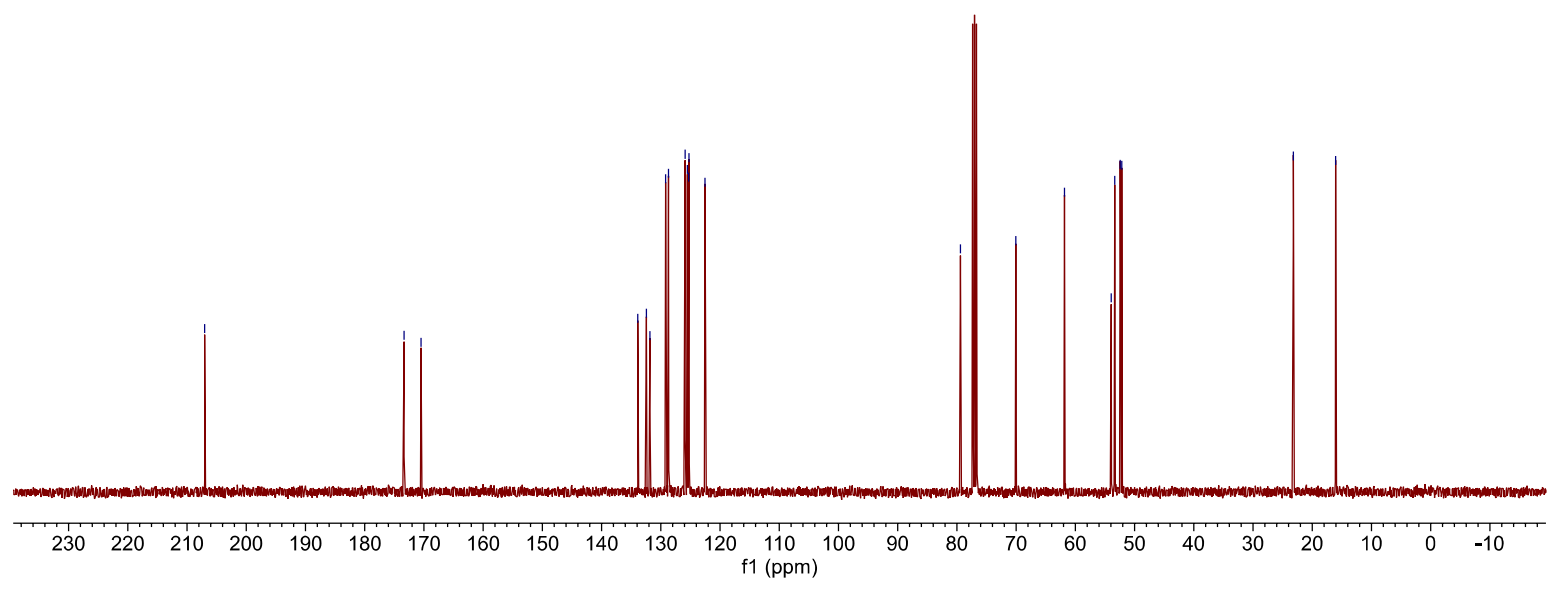

7.35  
7.34

6.30  
6.30  
6.29

4.33  
4.31

3.78  
3.77  
3.75

3.48  
3.44

3.23  
3.18  
3.05  
3.03

1.66

1.29

| Parameter          | Value               |
|--------------------|---------------------|
| 1 Title            | LLC-2-64-c-H.1.fid  |
| 2 Origin           | Bruker BioSpin GmbH |
| 3 Solvent          | CDCl3               |
| 4 Temperature      | 299.8               |
| 5 Number of Scans  | 4                   |
| 6 Relaxation Delay | 5.0000              |
| 7 Acquisition Date | 2022-09-09T23:00:42 |
| 8 Spectrometer     | 400.13              |
| Frequency          |                     |

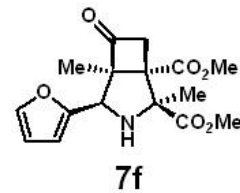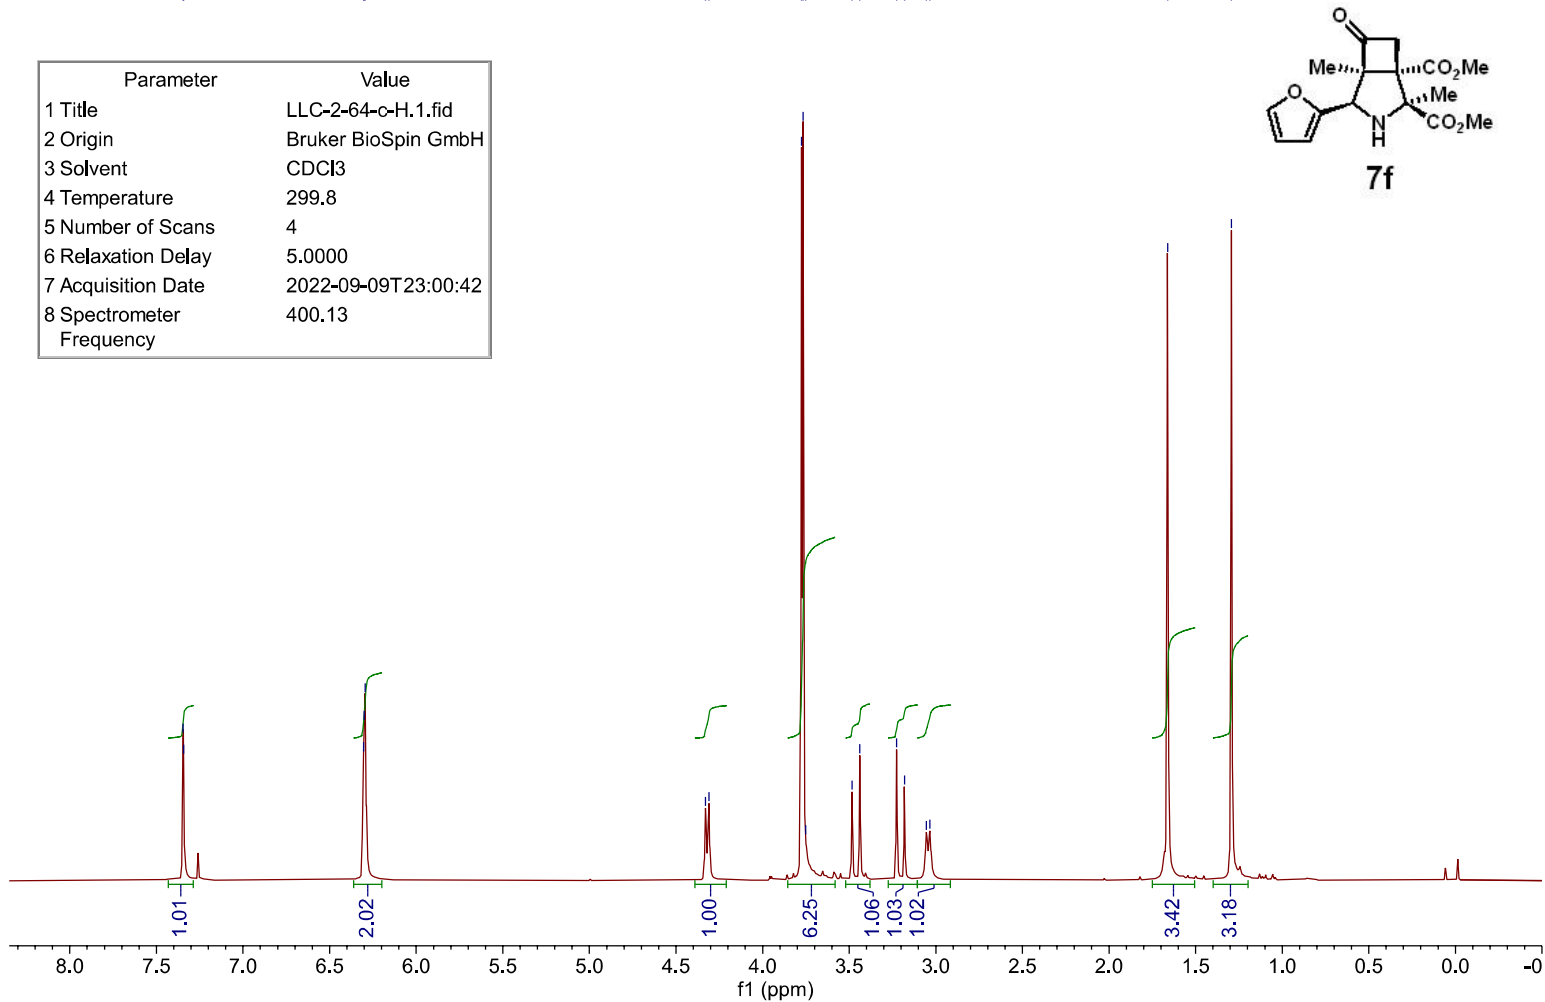

205.56

172.61  
170.29

149.85

142.61

110.29  
107.62

78.69

70.48

63.48

55.02

52.63

52.24

52.20

22.39

15.84

| Parameter          | Value               |
|--------------------|---------------------|
| 1 Title            | LLC-2-64-c-C.1.fid  |
| 2 Origin           | Bruker BioSpin GmbH |
| 3 Solvent          | CDCl3               |
| 4 Temperature      | 300.3               |
| 5 Number of Scans  | 300                 |
| 6 Relaxation Delay | 1.0000              |
| 7 Acquisition Date | 2022-09-09T23:13:08 |
| 8 Spectrometer     | 100.62              |
| Frequency          |                     |

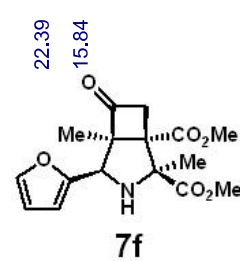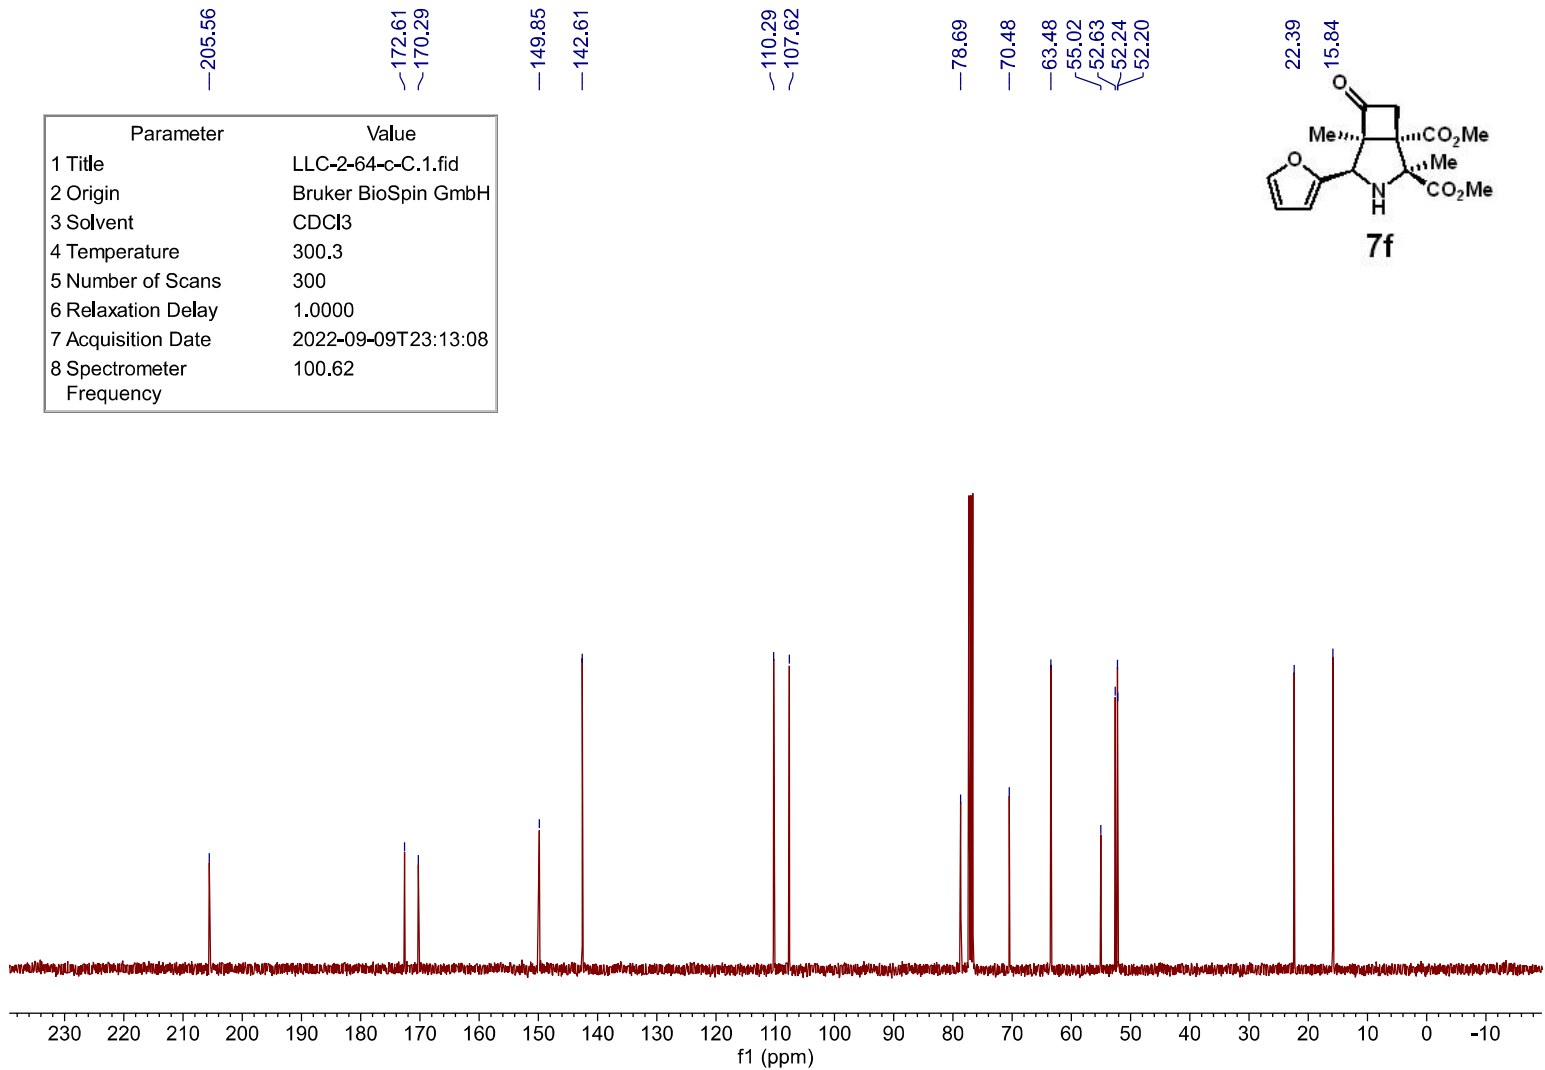

| Parameter                | Value                |
|--------------------------|----------------------|
| 1 Title                  | llc-2-70.1.fid       |
| 2 Origin                 | Bruker BioSpin GmbH  |
| 3 Solvent                | CDCl3                |
| 4 Temperature            | 299.9                |
| 5 Number of Scans        | 4                    |
| 6 Relaxation Delay       | 5.0000               |
| 7 Acquisition Date       | 2022-09-17T 18:28:45 |
| 8 Spectrometer Frequency | 400.13               |

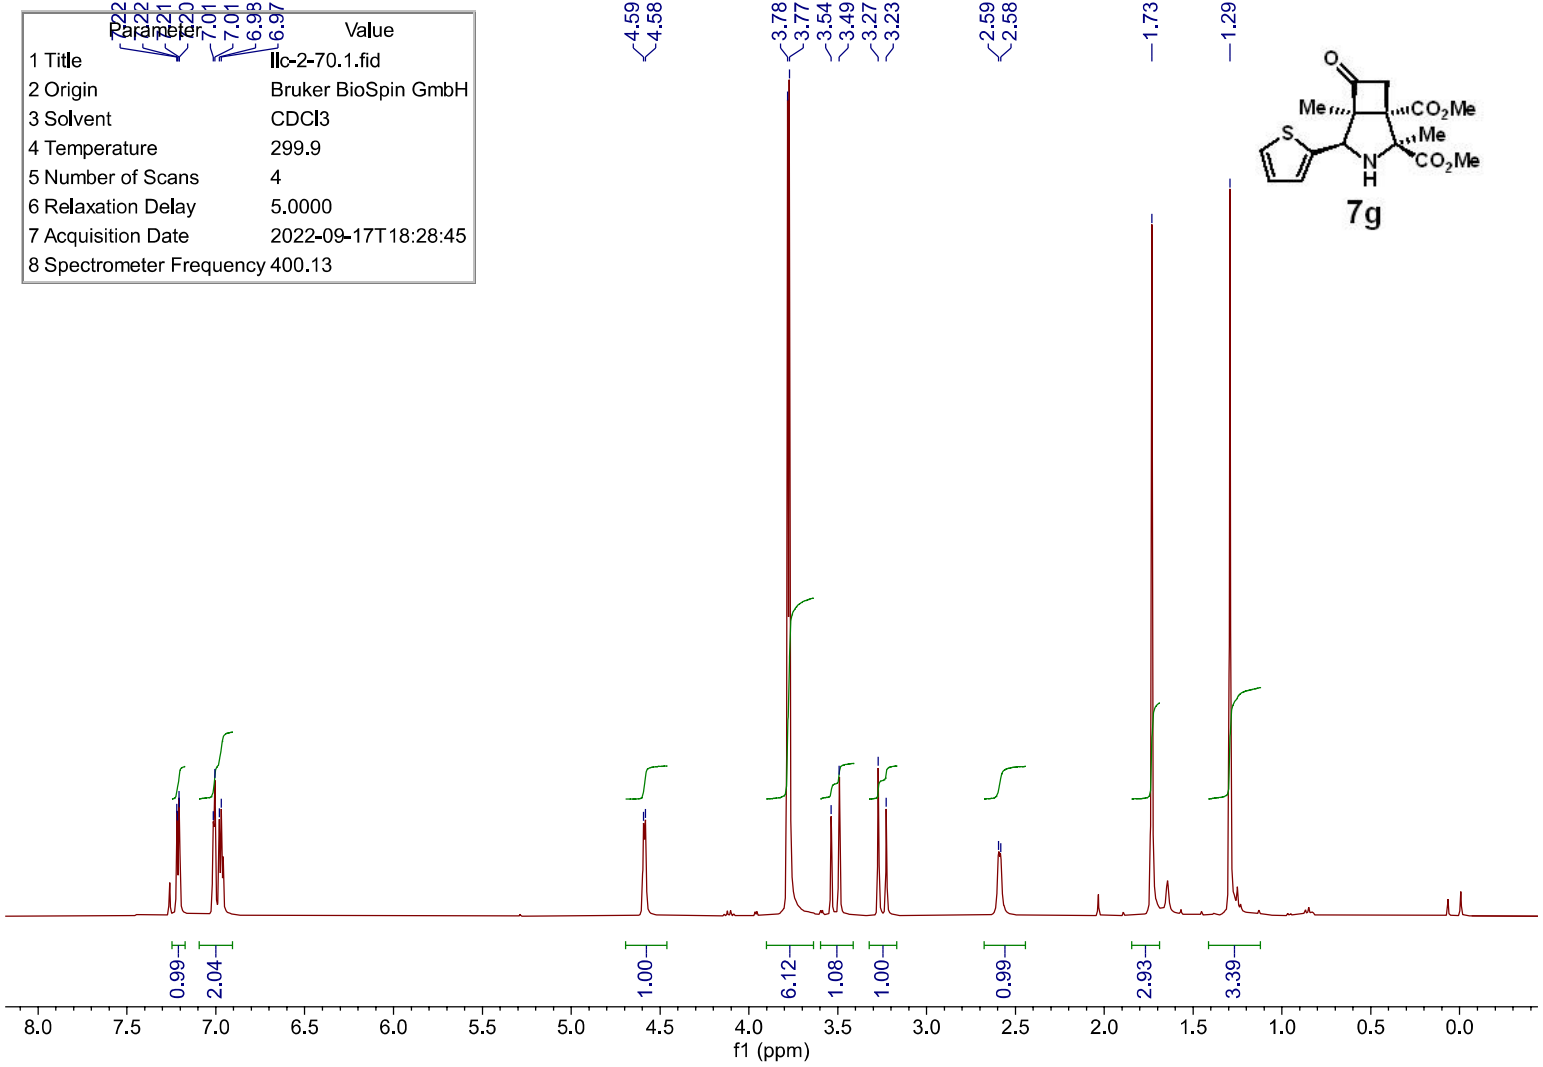

| Parameter                | Value                |
|--------------------------|----------------------|
| 1 Title                  | llc-2-70-C.1.fid     |
| 2 Origin                 | Bruker BioSpin GmbH  |
| 3 Solvent                | CDCl3                |
| 4 Temperature            | 300.5                |
| 5 Number of Scans        | 300                  |
| 6 Relaxation Delay       | 1.0000               |
| 7 Acquisition Date       | 2022-09-17T 22:46:37 |
| 8 Spectrometer Frequency | 100.62               |

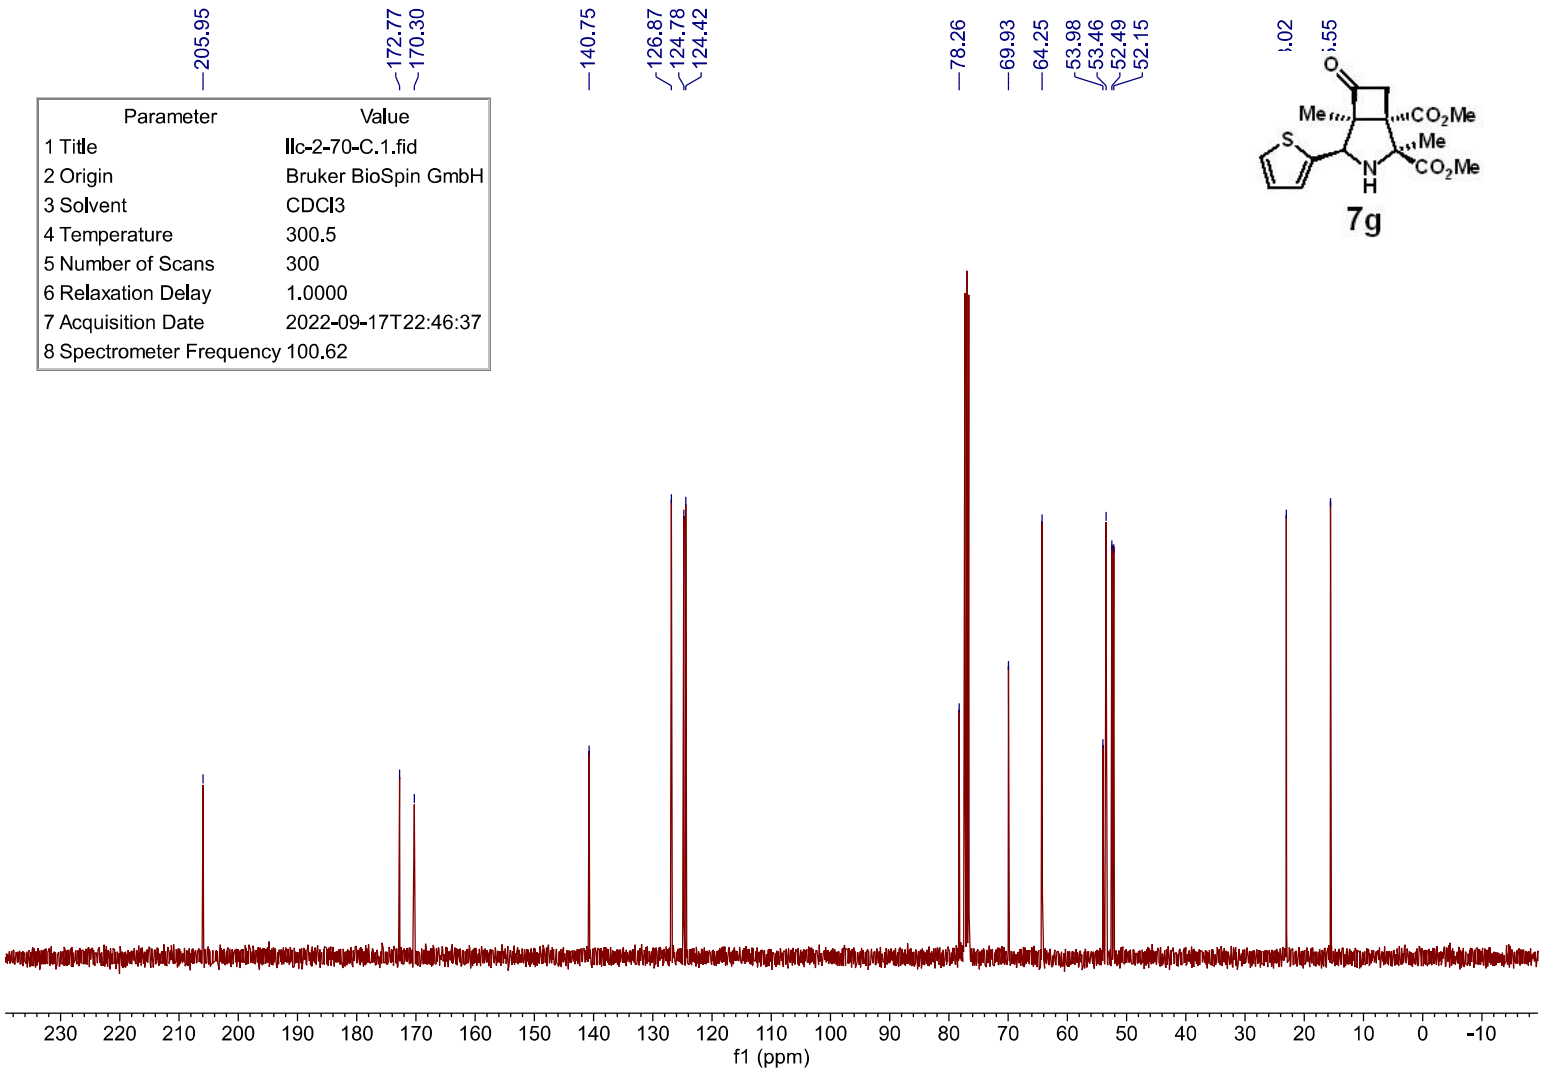

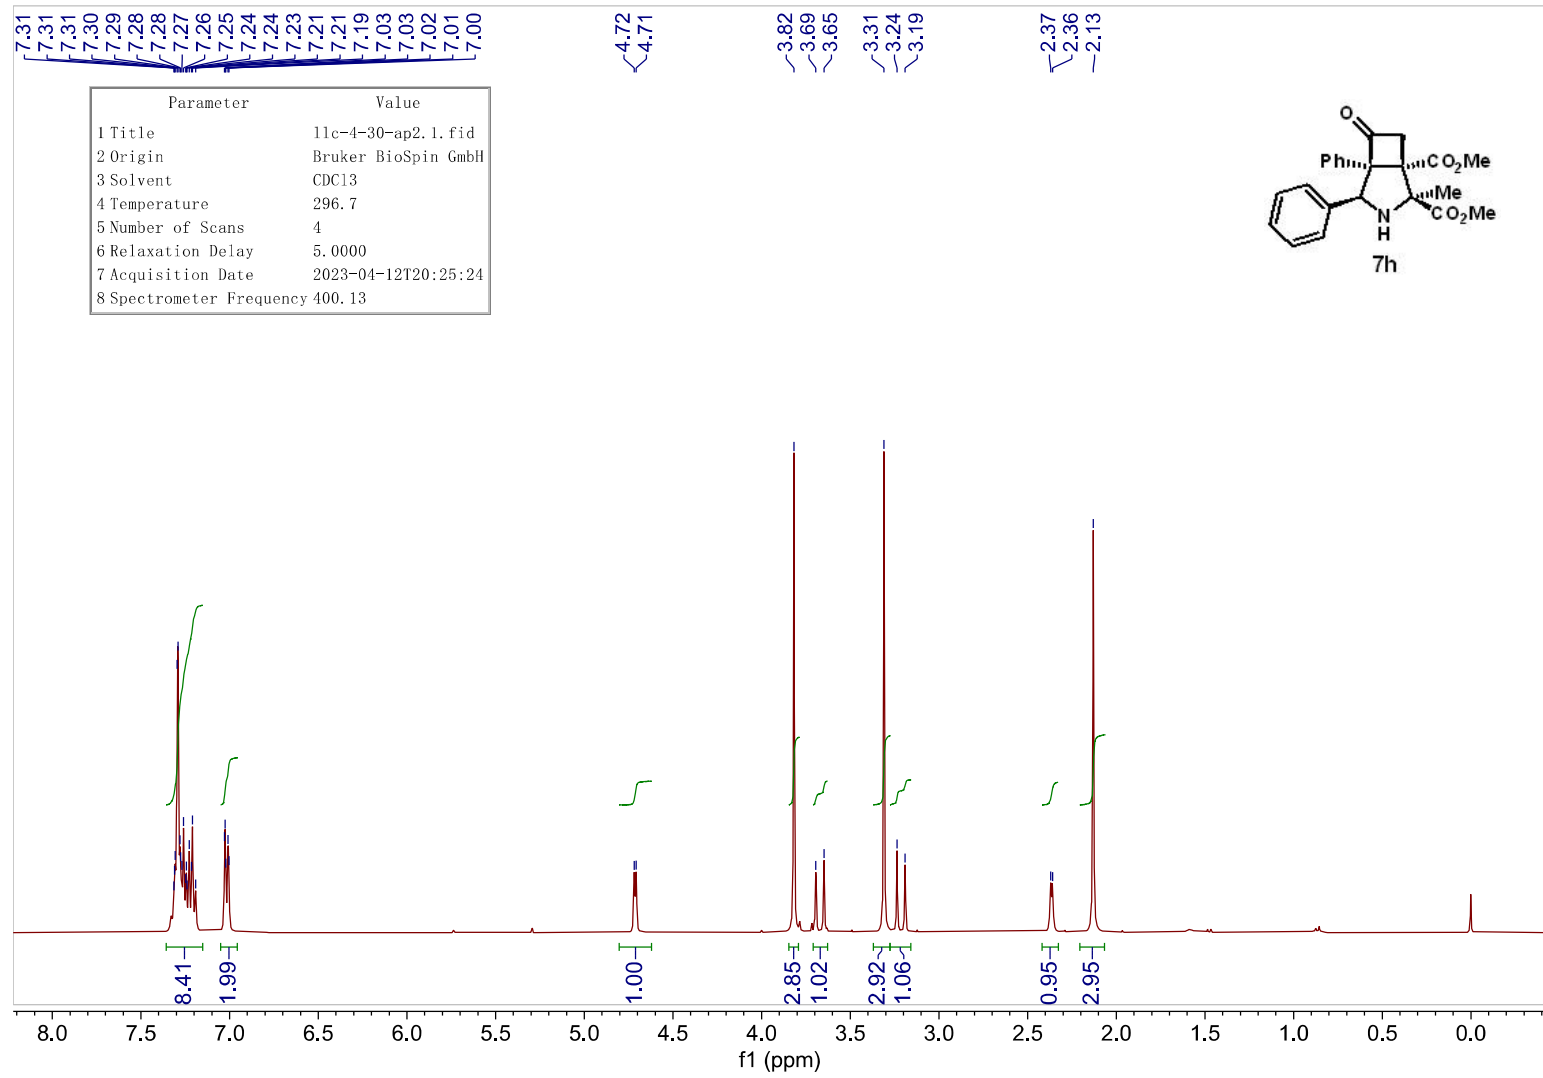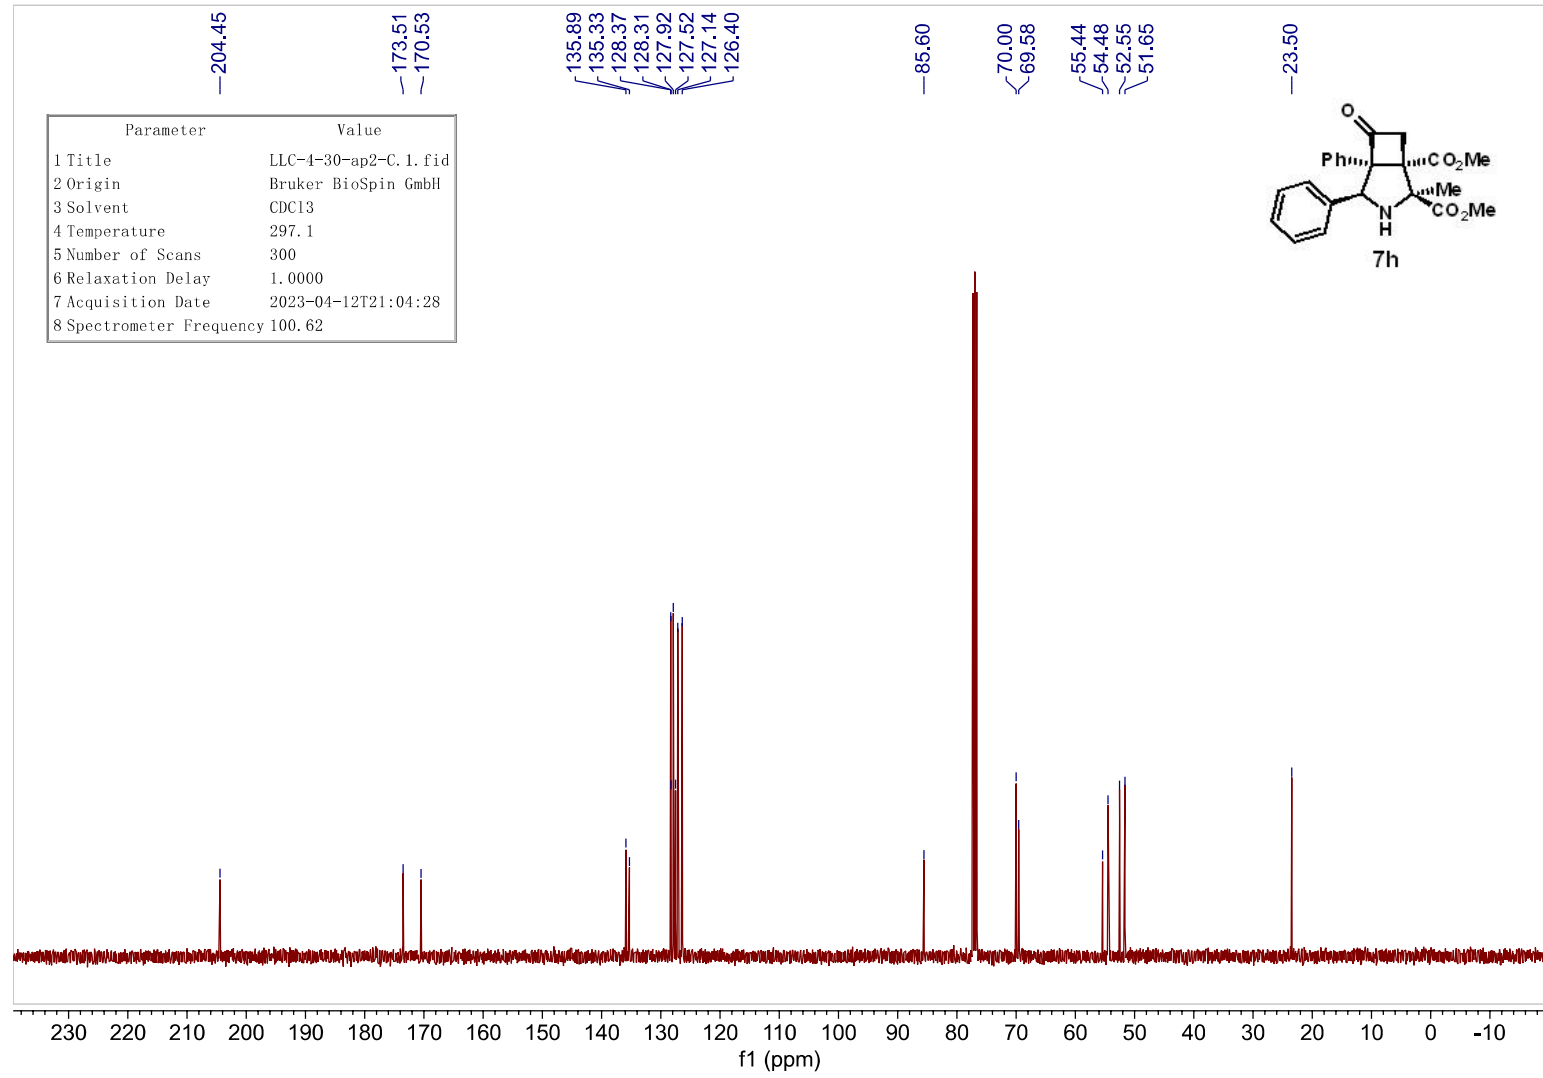

7.38  
7.37  
7.36  
7.35  
7.34  
7.33  
7.32  
7.31  
7.28  
7.26  
7.25  
7.24  
7.23  
7.22  
7.03  
7.02  
7.01

4.44  
4.43  
3.87  
3.85  
3.84  
3.73  
3.71  
3.71  
3.69  
3.62  
3.57  
3.49  
3.46  
3.43  
3.42  
3.40  
3.24  
3.19  
2.50  
2.49

1.31

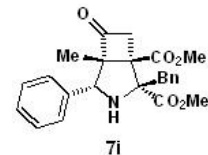

| Parameter                | Value               |
|--------------------------|---------------------|
| 1 Title                  | 11c-1-168.1.fid     |
| 2 Origin                 | Bruker BioSpin GmbH |
| 3 Solvent                | CDCl3               |
| 4 Temperature            | 298.7               |
| 5 Number of Scans        | 4                   |
| 6 Relaxation Delay       | 5.0000              |
| 7 Acquisition Date       | 2022-07-20T02:46:12 |
| 8 Spectrometer Frequency | 400.13              |

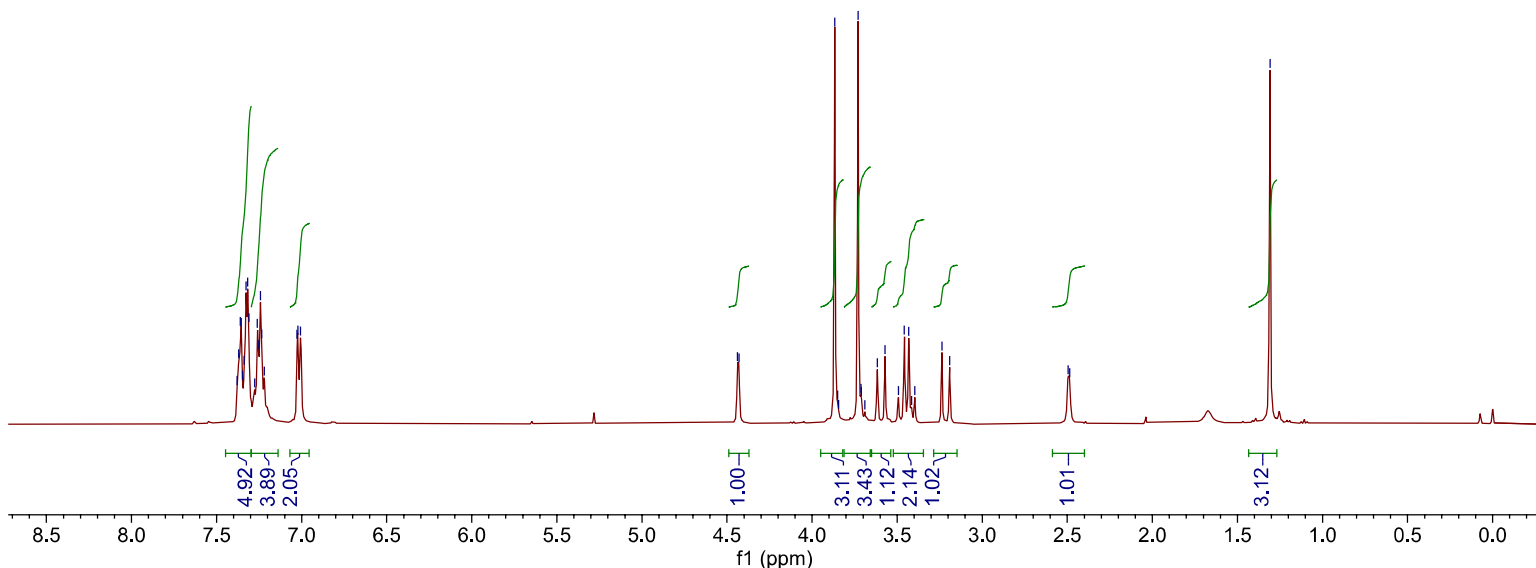

206.81

171.99  
170.22

136.60  
135.82  
129.45  
128.84  
128.56  
128.30  
127.30  
127.29

78.21  
74.17  
68.44

54.15  
53.02  
52.40  
52.15

38.68

15.17

| Parameter                | Value               |
|--------------------------|---------------------|
| 1 Title                  | 11c-1-160-C-2.1.fid |
| 2 Origin                 | Bruker BioSpin GmbH |
| 3 Solvent                | CDCl3               |
| 4 Temperature            | 299.3               |
| 5 Number of Scans        | 600                 |
| 6 Relaxation Delay       | 2.0000              |
| 7 Acquisition Date       | 2022-07-17T18:34:48 |
| 8 Spectrometer Frequency | 100.62              |

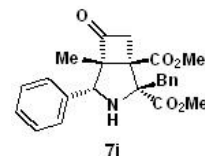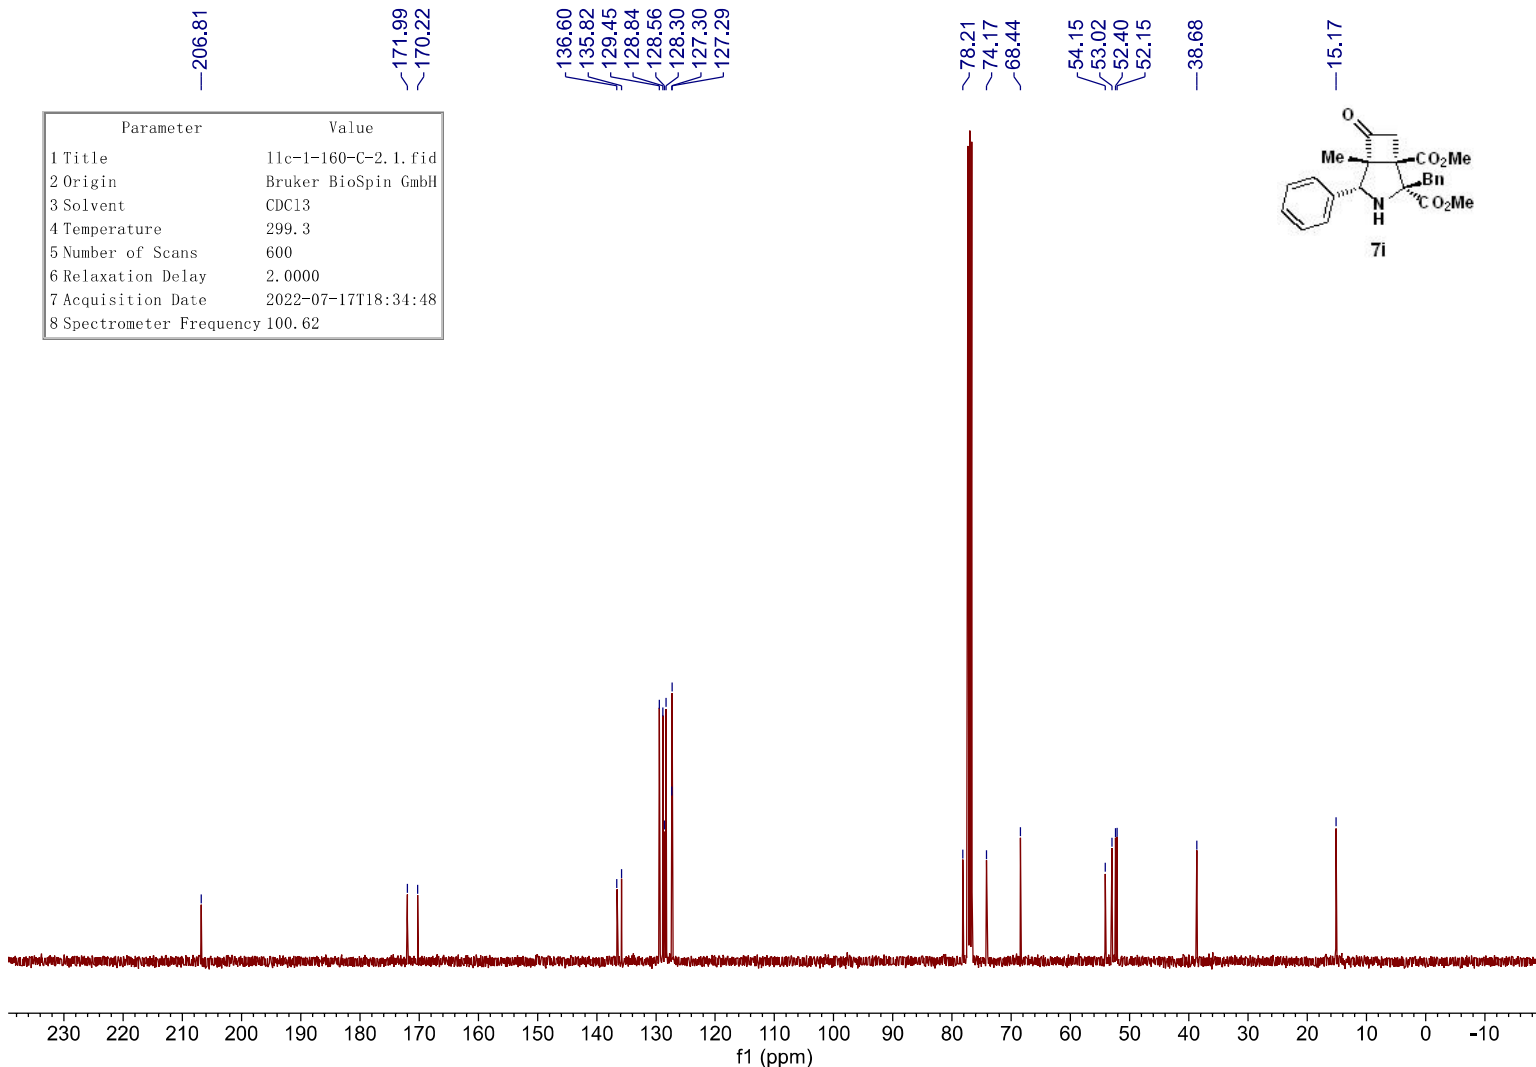

7.41  
7.40  
7.39  
7.26  
7.24  
7.22  
7.22  
7.21  
7.20  
7.19  
7.17  
7.15  
7.14  
7.13  
7.08  
7.07  
7.06

4.82  
4.80  
4.79

3.74  
3.63  
3.45  
3.43  
3.41

3.05  
3.01  
2.73  
2.68

| Parameter                | Value               |
|--------------------------|---------------------|
| 1 Title                  | llc-2-66-b2.1.fid   |
| 2 Origin                 | Bruker BioSpin GmbH |
| 3 Solvent                | CDCl3               |
| 4 Temperature            | 300.0               |
| 5 Number of Scans        | 4                   |
| 6 Relaxation Delay       | 5.0000              |
| 7 Acquisition Date       | 2022-09-13T15:25:09 |
| 8 Spectrometer Frequency | 400.13              |

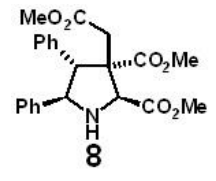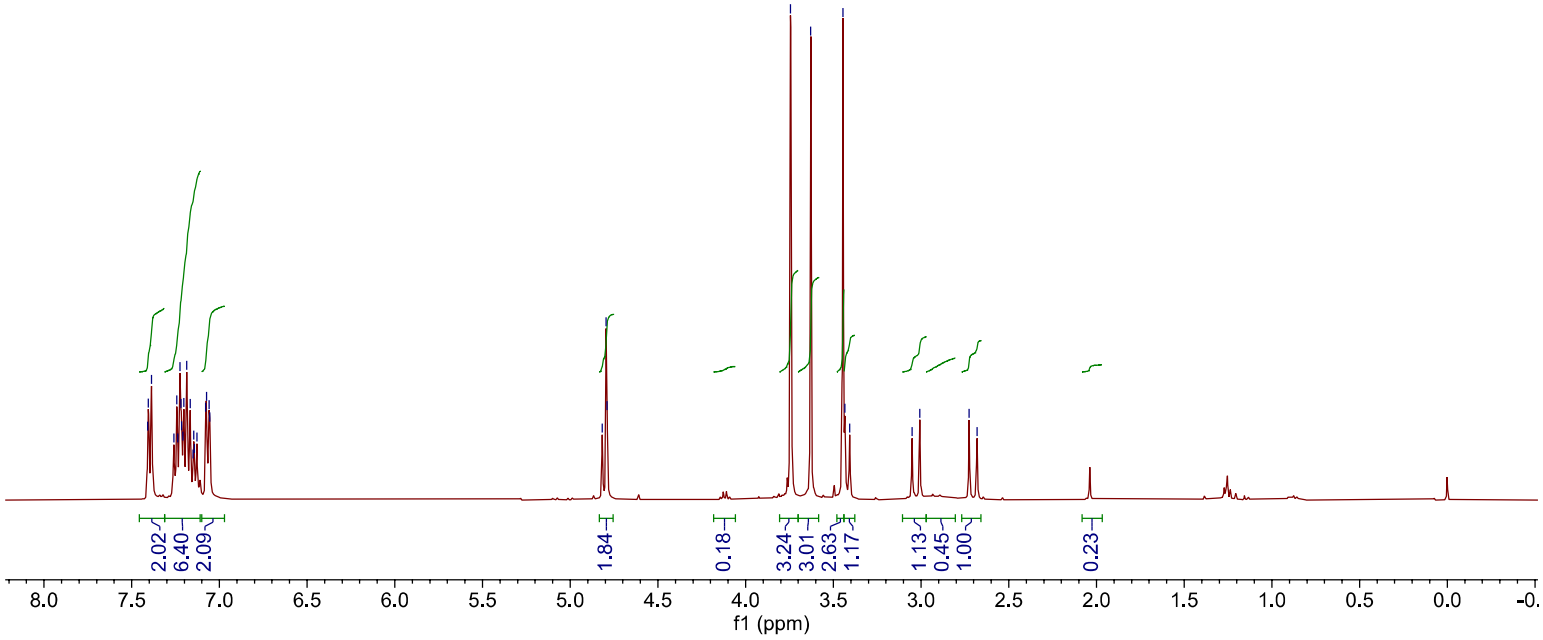

173.97  
172.59  
171.51

141.74  
134.98  
128.92  
128.26  
128.18  
127.74  
127.24

64.67  
64.59  
61.42  
59.25  
51.94  
51.79  
51.68

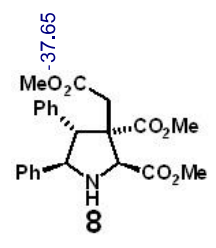

| Parameter                | Value               |
|--------------------------|---------------------|
| 1 Title                  | llc-2-66-b2-C.1.fid |
| 2 Origin                 | Bruker BioSpin GmbH |
| 3 Solvent                | CDCl3               |
| 4 Temperature            | 300.4               |
| 5 Number of Scans        | 300                 |
| 6 Relaxation Delay       | 1.0000              |
| 7 Acquisition Date       | 2022-09-13T15:37:36 |
| 8 Spectrometer Frequency | 100.62              |

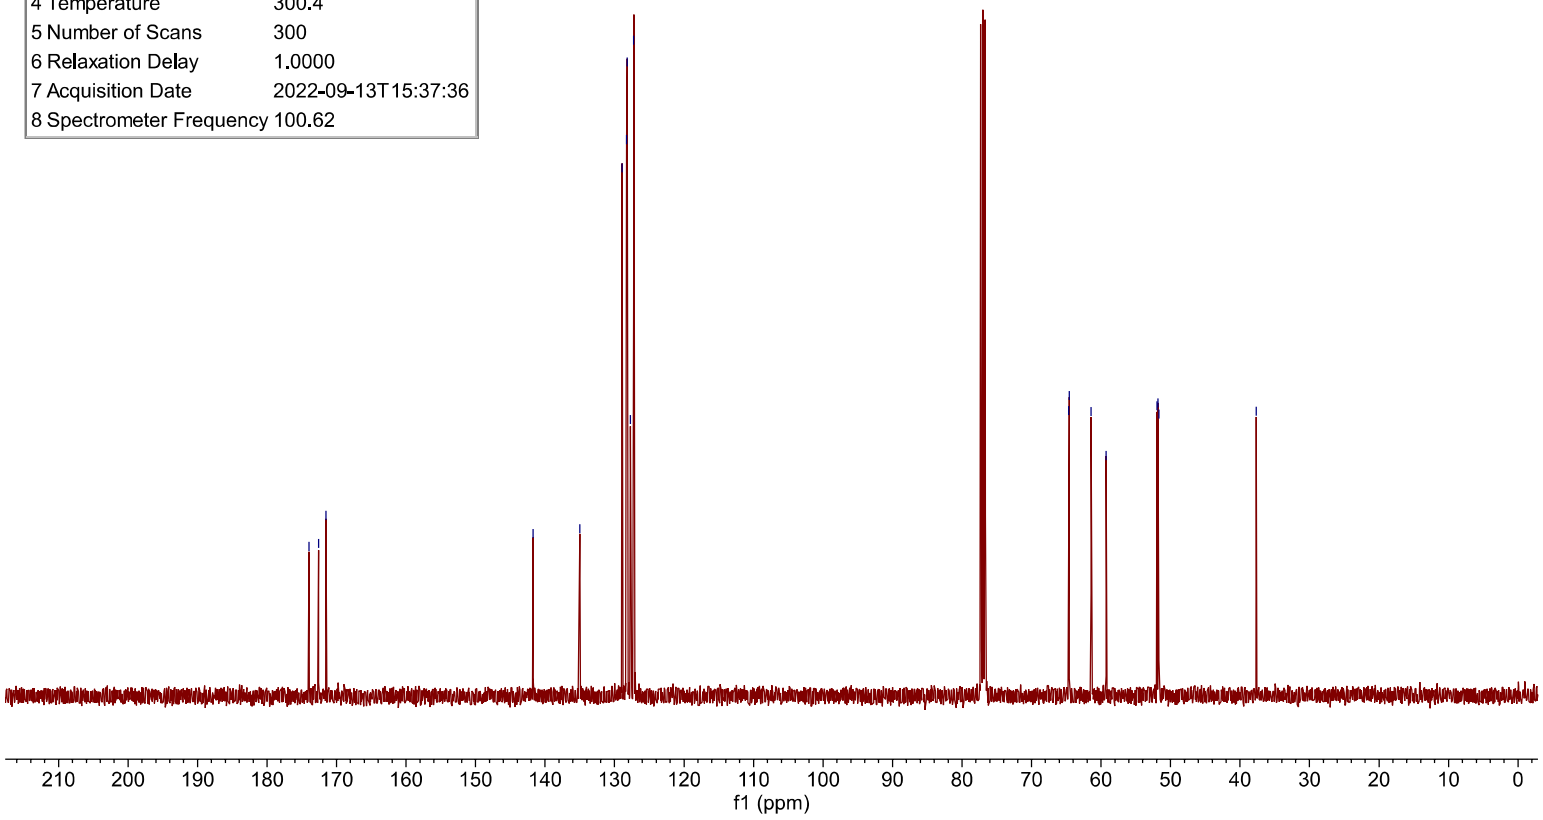

7.28  
7.26  
7.25  
7.08  
7.07  
7.06  
7.04  
7.04  
7.03  
7.02  
7.01  
7.01  
7.00  
6.99  
6.99  
6.98  
6.97  
6.96  
6.94  
6.92  
5.65  
5.63

4.51  
4.49

4.10  
4.07

3.78  
3.75  
3.74

3.72  
3.71

3.55  
3.54  
3.52  
3.51

3.10  
3.06  
2.91

2.03  
2.03  
1.98

| Parameter                | Value               |
|--------------------------|---------------------|
| 1 Title                  | llc-2-88-a.1.fid    |
| 2 Origin                 | Bruker BioSpin GmbH |
| 3 Solvent                | CDCl3               |
| 4 Temperature            | 298.2               |
| 5 Number of Scans        | 4                   |
| 6 Relaxation Delay       | 5.0000              |
| 7 Acquisition Date       | 2022-09-30T03:21:04 |
| 8 Spectrometer Frequency | 400.13              |

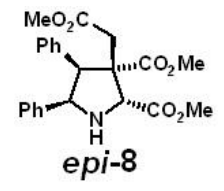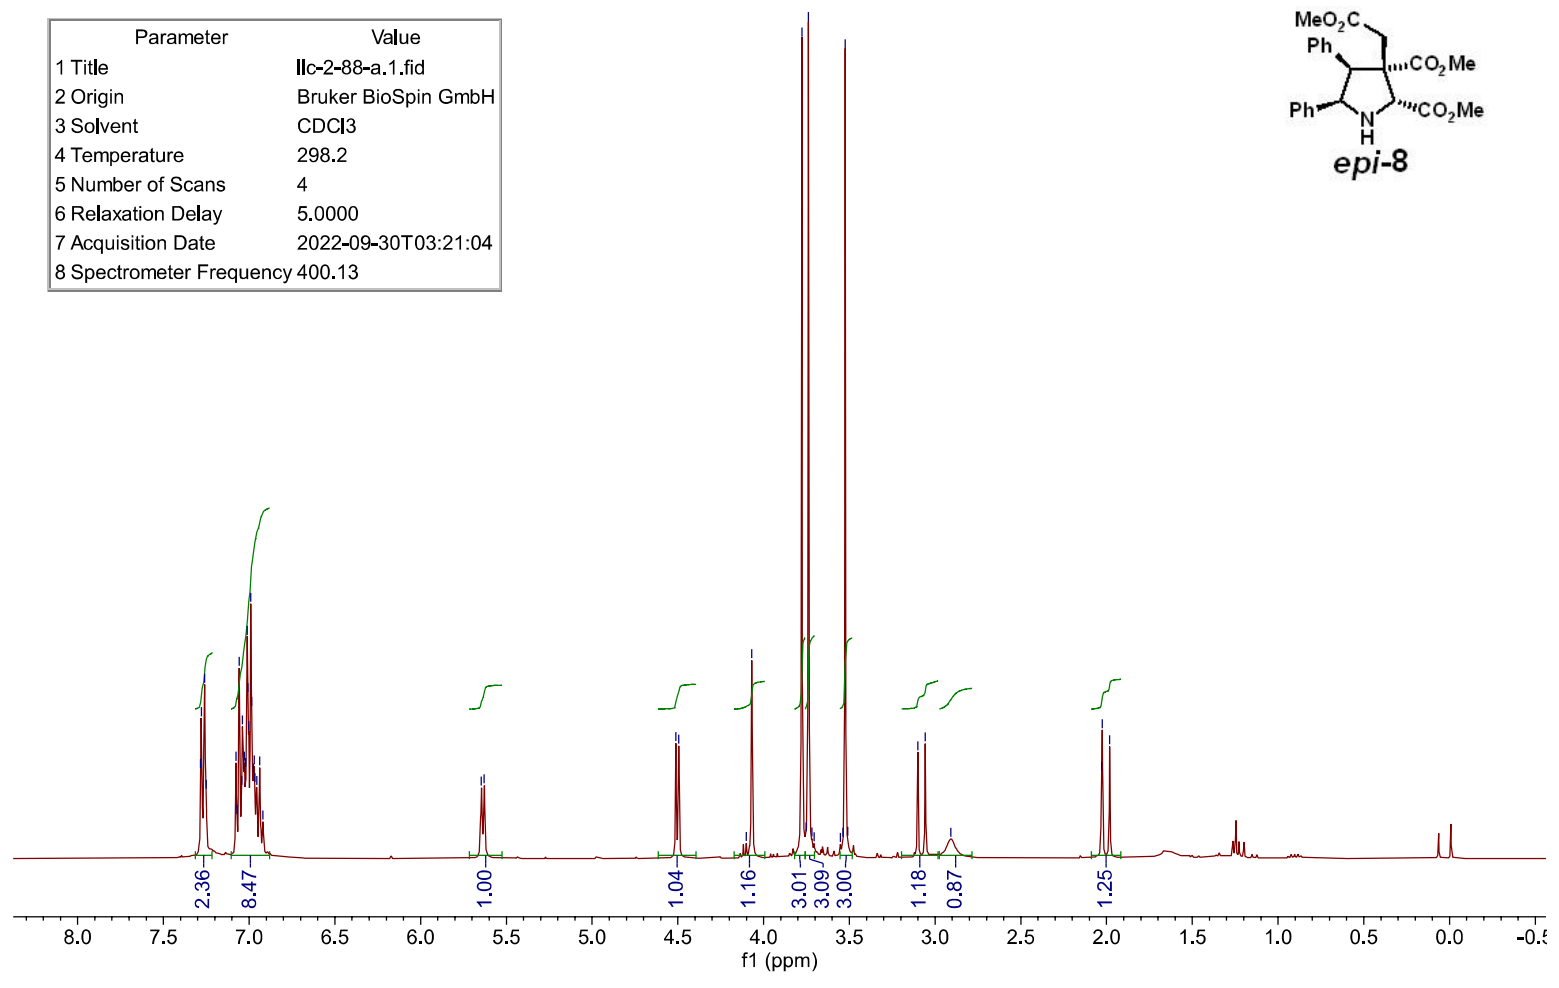

173.26  
173.21  
171.42

141.91  
136.91  
130.39  
127.82  
127.45  
126.87  
126.70  
125.59

67.23  
63.79  
60.17  
56.03  
52.70  
51.49

38.14

| Parameter                | Value               |
|--------------------------|---------------------|
| 1 Title                  | llc-2-88-a-C.1.fid  |
| 2 Origin                 | Bruker BioSpin GmbH |
| 3 Solvent                | CDCl3               |
| 4 Temperature            | 298.9               |
| 5 Number of Scans        | 300                 |
| 6 Relaxation Delay       | 1.0000              |
| 7 Acquisition Date       | 2022-09-30T14:25:20 |
| 8 Spectrometer Frequency | 100.62              |

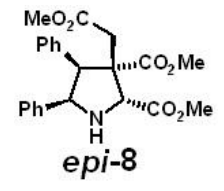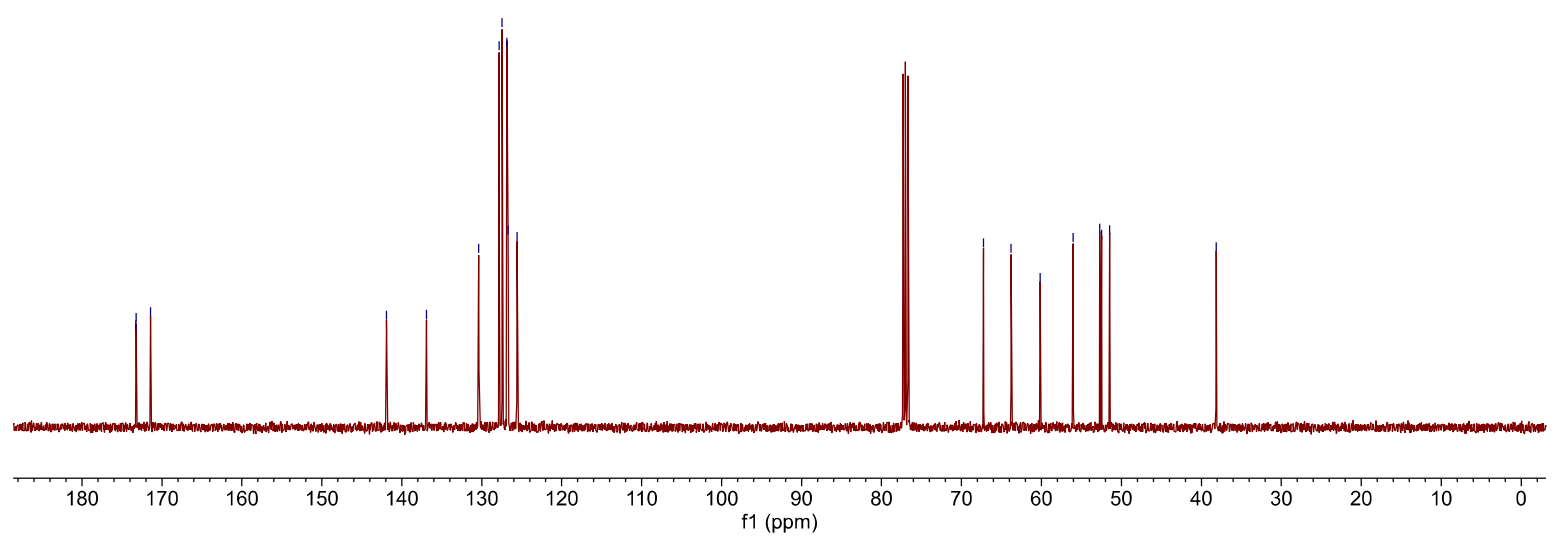



7.30  
7.28  
7.26  
7.21  
7.20  
7.19  
7.06  
7.05  
7.04  
7.03  
7.01  
6.99  
6.97  
6.96  
6.95

5.56  
5.17  
5.14

3.77  
3.64  
3.61  
3.58  
3.55

3.04  
2.99

2.44  
2.39  
2.34

| Parameter                | Value                 |
|--------------------------|-----------------------|
| 1 Title                  | LLC-3-102-2-ap2.1.fid |
| 2 Origin                 | Bruker BioSpin GmbH   |
| 3 Solvent                | CDCl3                 |
| 4 Temperature            | 295.8                 |
| 5 Number of Scans        | 4                     |
| 6 Relaxation Delay       | 5.0000                |
| 7 Acquisition Date       | 2023-02-17T04:51:02   |
| 8 Spectrometer Frequency | 400.13                |

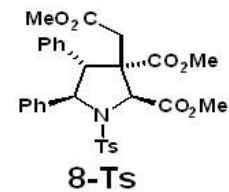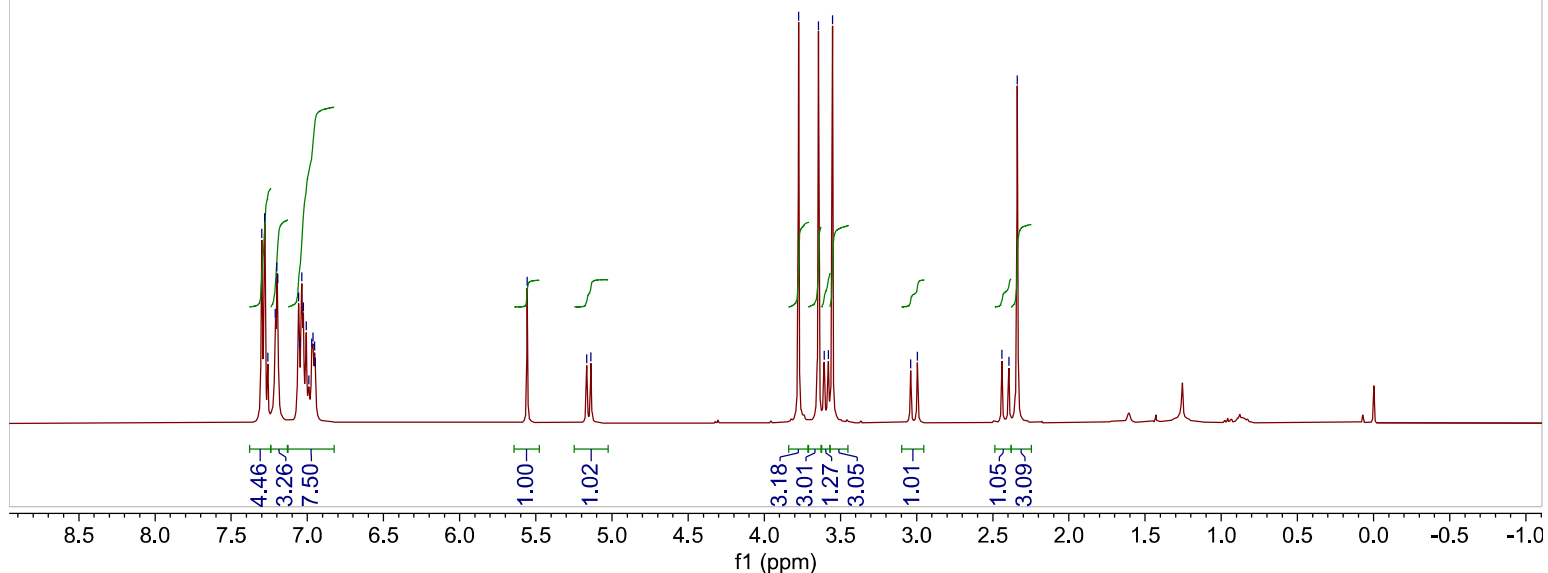

171.85  
170.59  
170.49

142.76  
137.96  
137.12  
132.24  
128.81  
128.44  
128.36  
128.20  
127.91  
127.54  
127.46

77.32  
77.00  
76.68

66.33  
65.59  
61.77  
55.81  
52.96  
52.16  
51.93

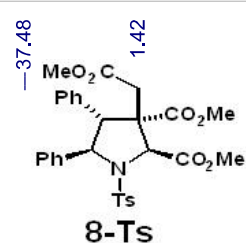

| Parameter                | Value                   |
|--------------------------|-------------------------|
| 1 Title                  | LLC-3-102-2-ap2-C.1.fid |
| 2 Origin                 | Bruker BioSpin GmbH     |
| 3 Solvent                | CDCl3                   |
| 4 Temperature            | 296.4                   |
| 5 Number of Scans        | 300                     |
| 6 Relaxation Delay       | 1.0000                  |
| 7 Acquisition Date       | 2023-02-17T05:03:44     |
| 8 Spectrometer Frequency | 100.62                  |

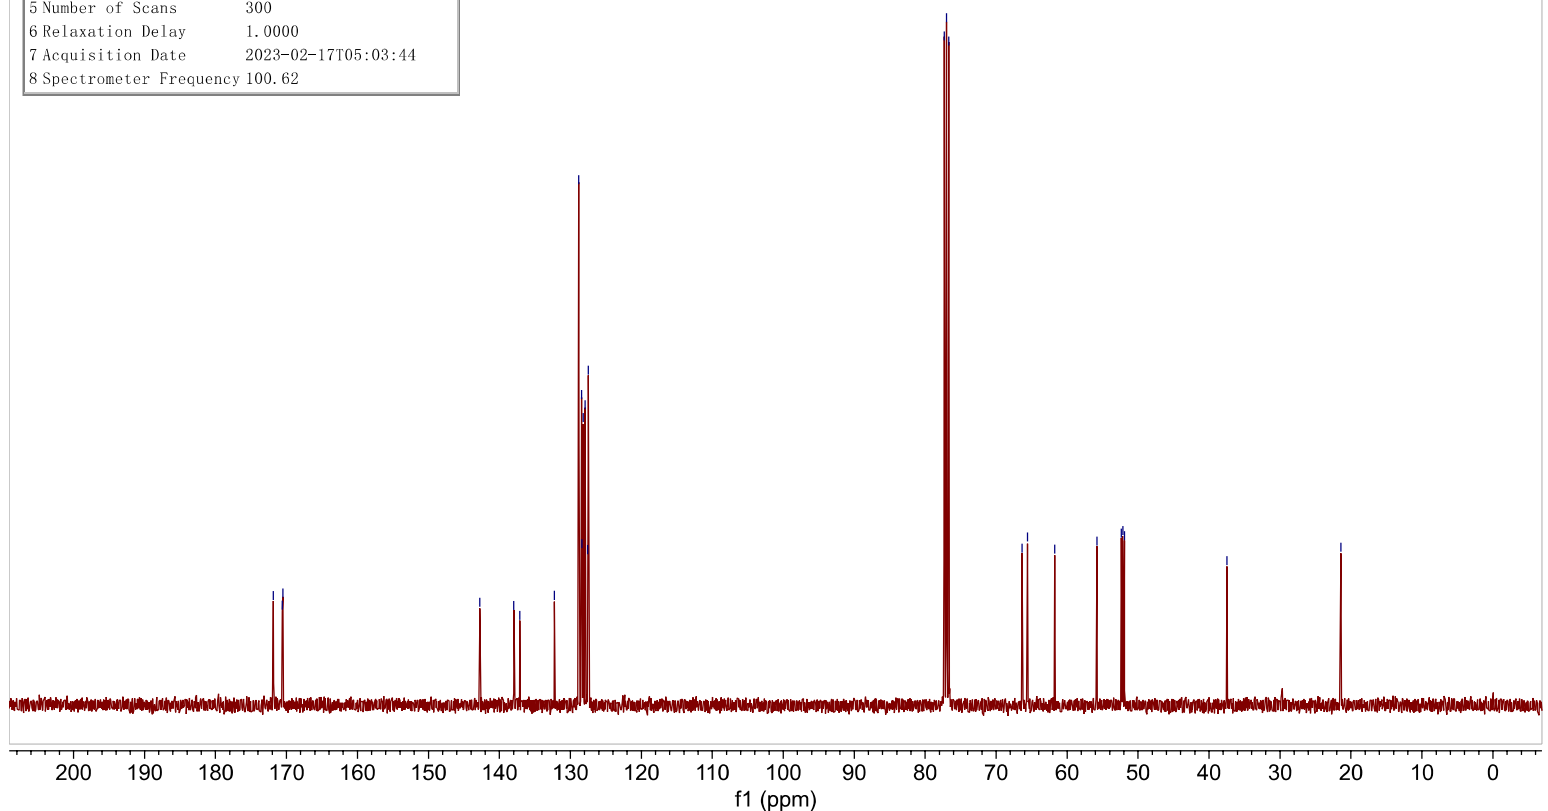

7.49  
7.49  
7.47  
7.26  
7.24  
7.22  
7.21  
7.20  
7.18  
7.16  
7.13  
7.12  
7.11  
7.10

5.14  
5.12

3.77  
3.65  
3.62  
3.61  
3.53

2.95

2.45  
2.40

1.82

| Parameter          | Value               |
|--------------------|---------------------|
| 1 Title            | LLC-4-63-p1B2.1.fid |
| 2 Origin           | Bruker BioSpin GmbH |
| 3 Solvent          | CDC13               |
| 4 Temperature      | 296.4               |
| 5 Number of Scans  | 4                   |
| 6 Relaxation Delay | 5.0000              |
| 7 Acquisition Date | 2023-04-25T23:09:40 |
| 8 Spectrometer     | 400.13              |
| Frequency          |                     |

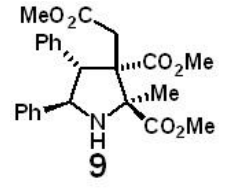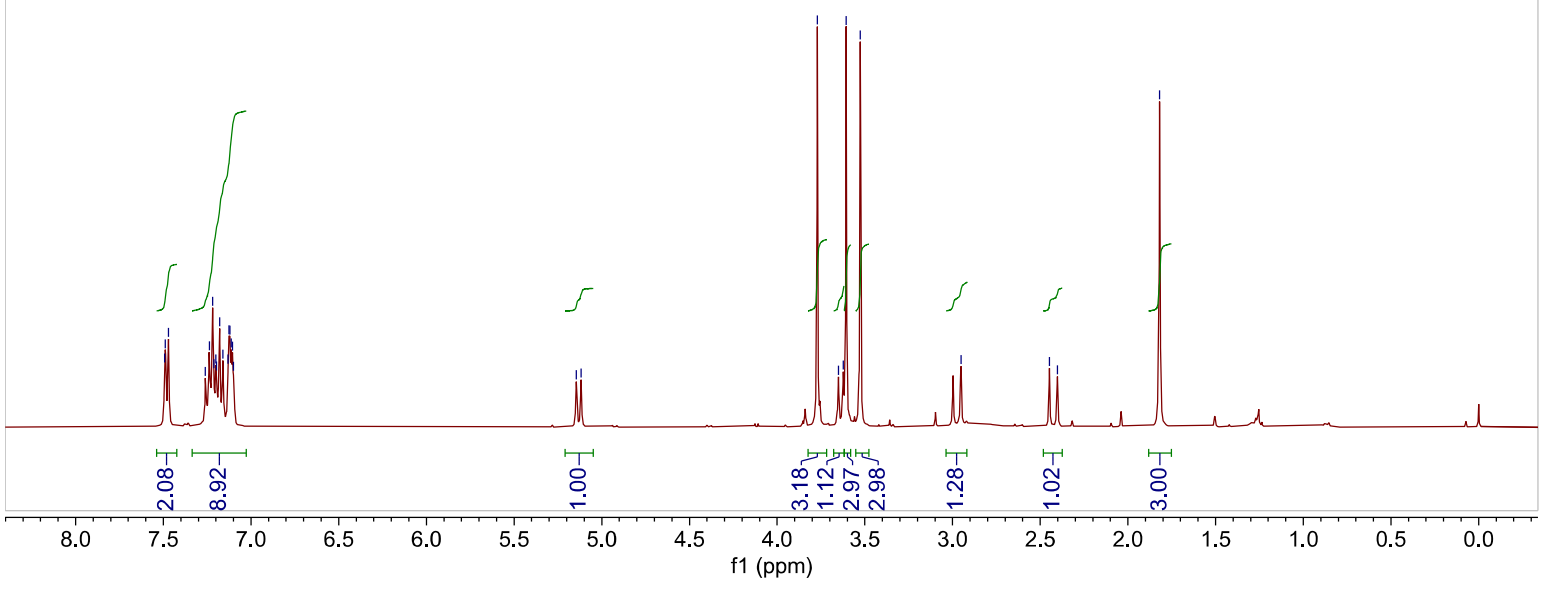

175.99  
170.76  
170.54

142.53  
134.87  
129.17  
128.34  
128.10  
127.88  
127.42  
126.96

71.54

63.71  
62.27  
61.50

52.20  
51.44  
51.38

38.27

21.91

| Parameter          | Value               |
|--------------------|---------------------|
| 1 Title            | LLC-4-34-b-C        |
| 2 Origin           | Varian              |
| 3 Solvent          | cdcl3               |
| 4 Temperature      | 25.0                |
| 5 Number of Scans  | 2000                |
| 6 Relaxation Delay | 1.0000              |
| 7 Acquisition Date | 2023-04-14T01:51:49 |
| 8 Spectrometer     | 100.56              |
| Frequency          |                     |

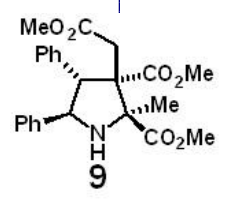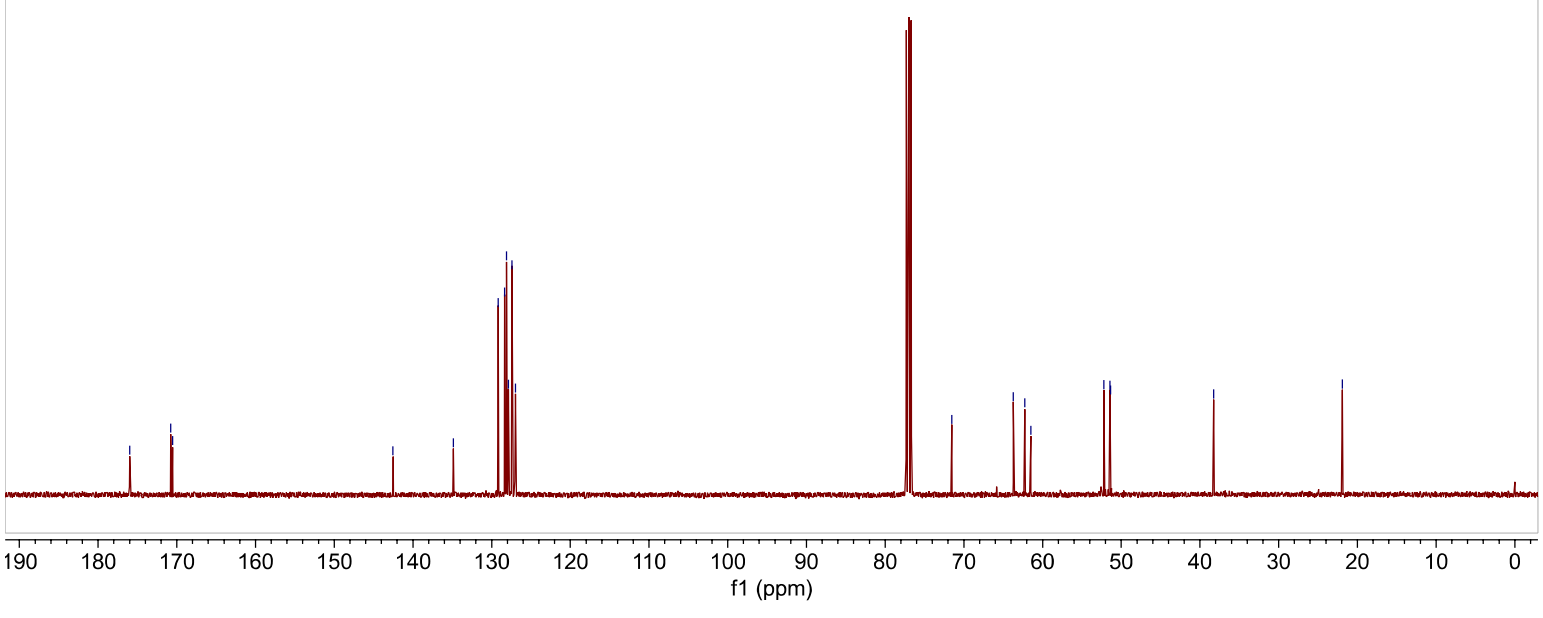

7.19  
7.18  
7.17  
7.08  
7.06  
7.04  
7.00  
6.98  
6.96  
6.95

5.09  
5.07

4.52  
4.50

3.86  
3.84

3.21  
3.20  
3.15

2.31  
2.27

1.59

| Parameter                | Value               |
|--------------------------|---------------------|
| 1 Title                  | LLC-4-63-p1A2.1.fid |
| 2 Origin                 | Bruker BioSpin GmbH |
| 3 Solvent                | CDCl3               |
| 4 Temperature            | 296.4               |
| 5 Number of Scans        | 4                   |
| 6 Relaxation Delay       | 5.0000              |
| 7 Acquisition Date       | 2023-04-25T23:05:53 |
| 8 Spectrometer Frequency | 400.13              |

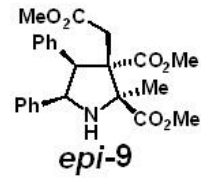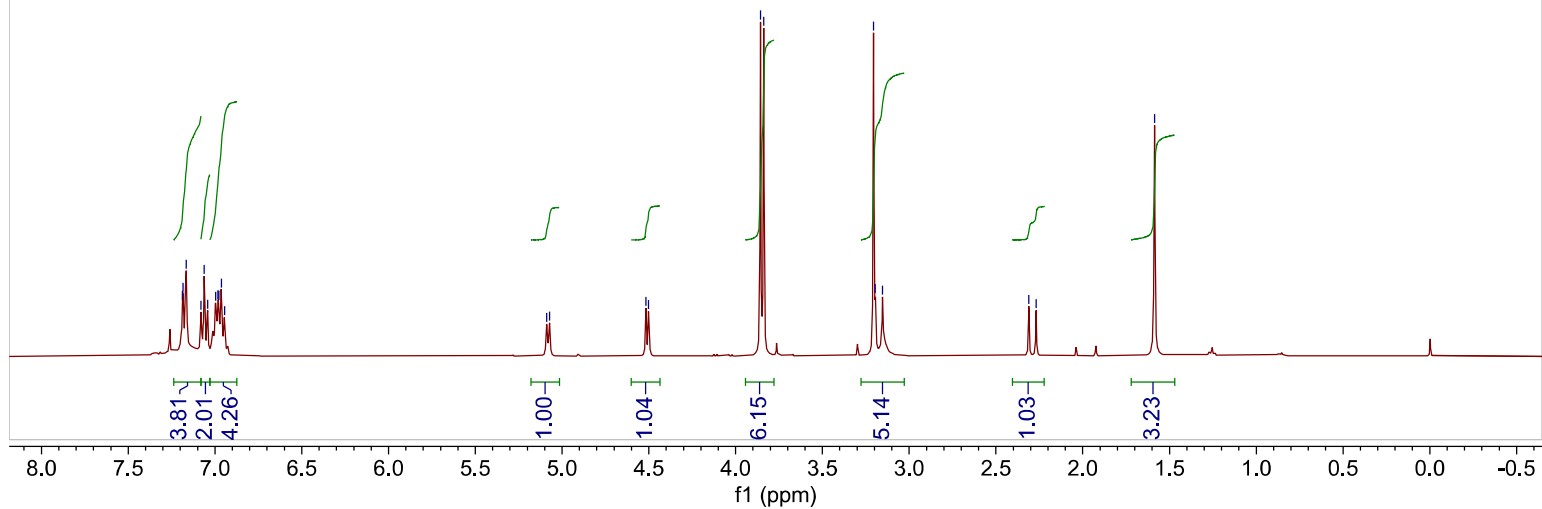

174.31  
174.23  
171.53

138.84  
136.70  
127.57  
127.31  
126.74  
126.46  
126.12

70.04  
64.30  
62.95  
58.26  
52.70  
52.31  
51.35

38.28

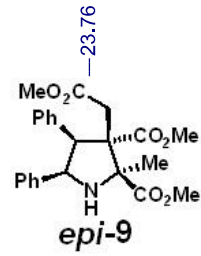

| Parameter                | Value               |
|--------------------------|---------------------|
| 1 Title                  | LLC-4-34-a-C        |
| 2 Origin                 | Varian              |
| 3 Solvent                | cdcl3               |
| 4 Temperature            | 25.0                |
| 5 Number of Scans        | 2000                |
| 6 Relaxation Delay       | 1.0000              |
| 7 Acquisition Date       | 2023-04-14T00:32:20 |
| 8 Spectrometer Frequency | 100.56              |

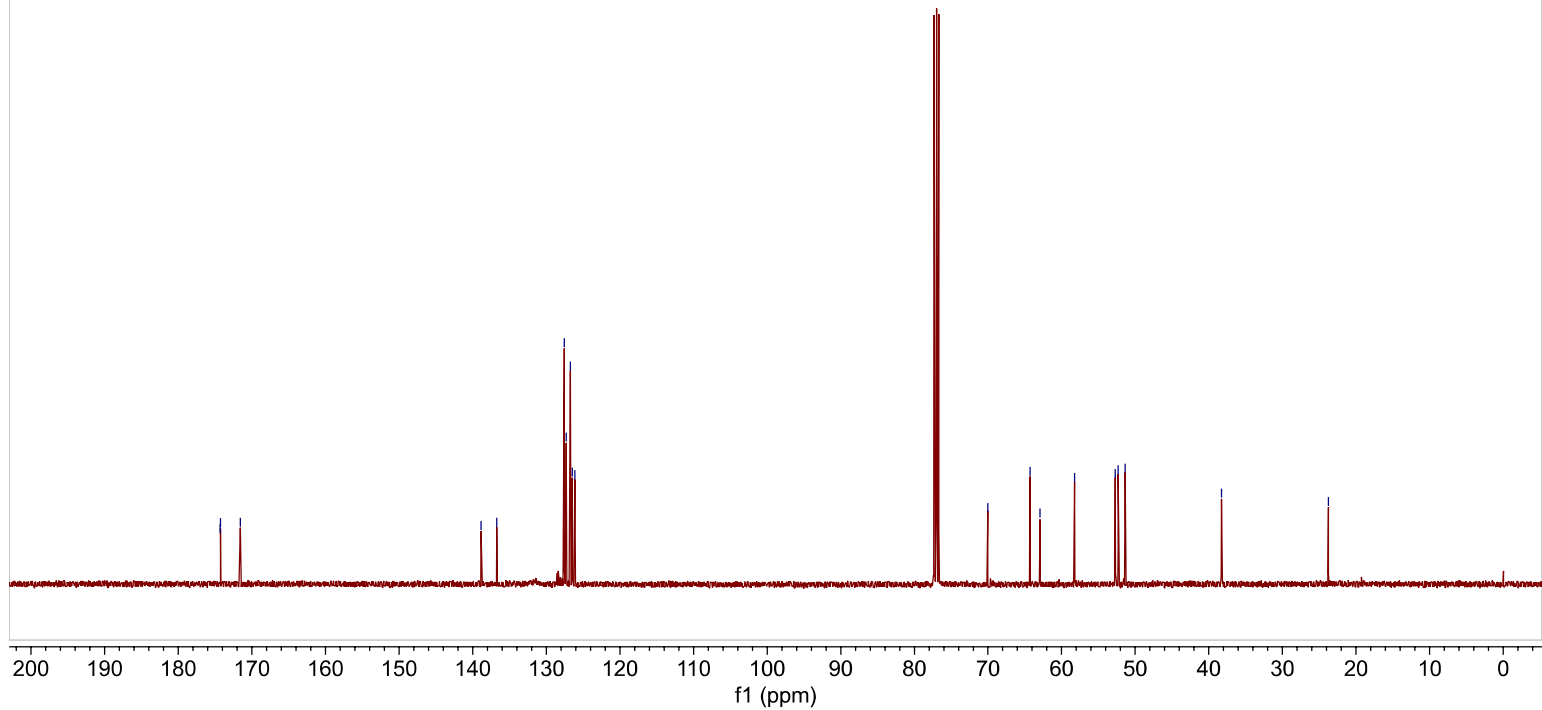

7.92  
7.91  
7.90  
7.89  
7.27  
7.26  
7.25  
7.24  
7.23  
7.22  
7.21  
7.00  
7.00  
6.99  
6.98

4.82

3.80  
3.70  
3.48  
3.44  
3.29

2.68  
2.64

2.15

| Parameter                | Value               |
|--------------------------|---------------------|
| 1 Title                  | LLC-3-39-5B.1.fid   |
| 2 Origin                 | Bruker BioSpin GmbH |
| 3 Solvent                | CDCl3               |
| 4 Temperature            | 296.5               |
| 5 Number of Scans        | 4                   |
| 6 Relaxation Delay       | 5.0000              |
| 7 Acquisition Date       | 2023-04-14T03:57:32 |
| 8 Spectrometer Frequency | 400.13              |

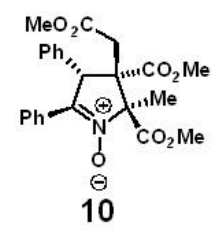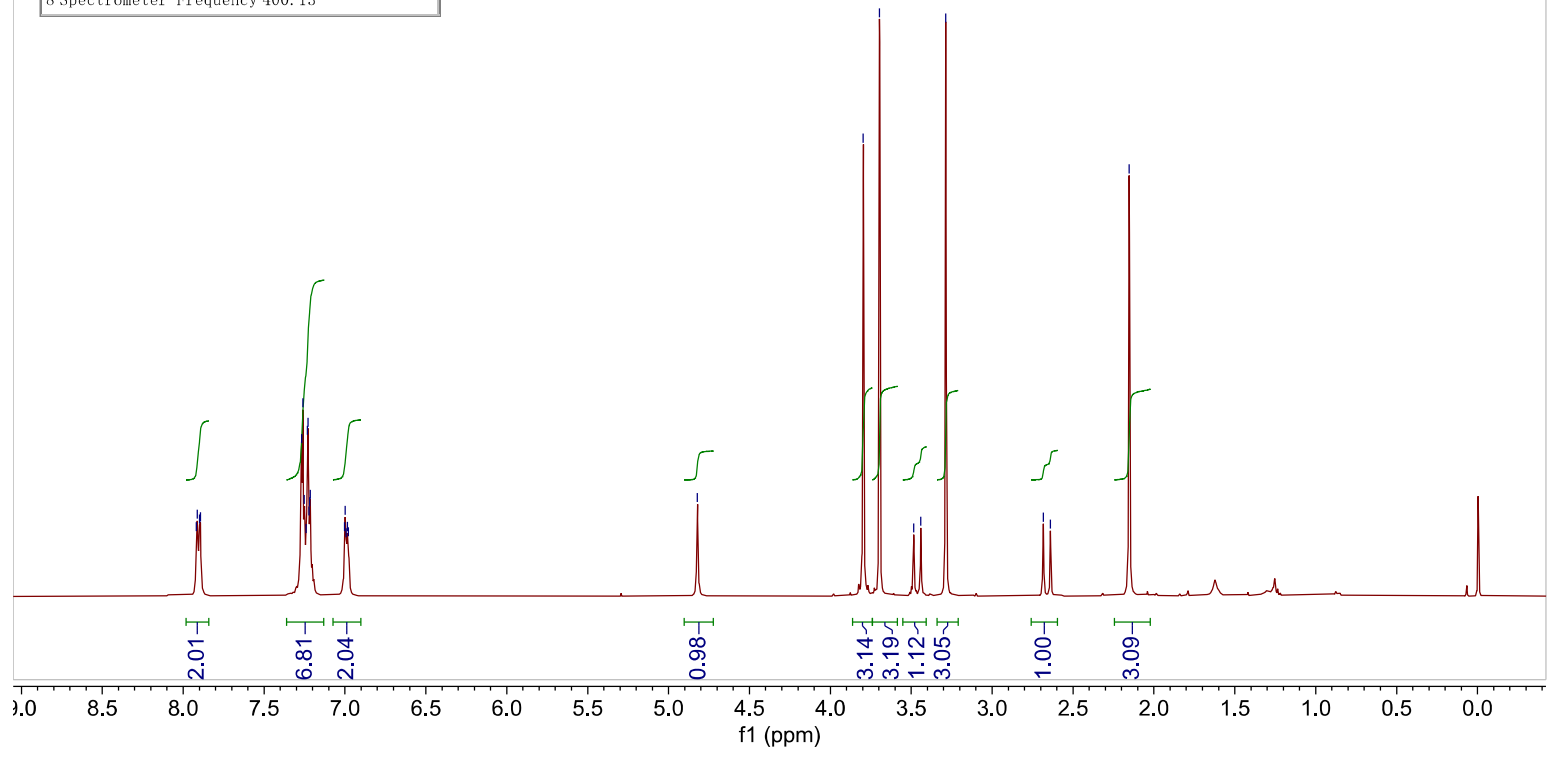

169.82  
169.61  
168.17

141.29  
134.45  
129.84  
129.62  
128.50  
128.48  
128.30  
128.15  
127.88

84.71

57.67  
56.02  
53.49  
51.89  
51.87

38.03

17.67

| Parameter                | Value               |
|--------------------------|---------------------|
| 1 Title                  | LLC-4-39-5-C.1.fid  |
| 2 Origin                 | Bruker BioSpin GmbH |
| 3 Solvent                | CDCl3               |
| 4 Temperature            | 297.1               |
| 5 Number of Scans        | 500                 |
| 6 Relaxation Delay       | 1.0000              |
| 7 Acquisition Date       | 2023-04-13T21:55:08 |
| 8 Spectrometer Frequency | 100.62              |

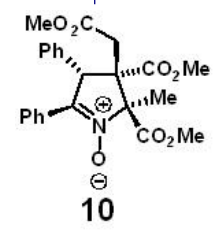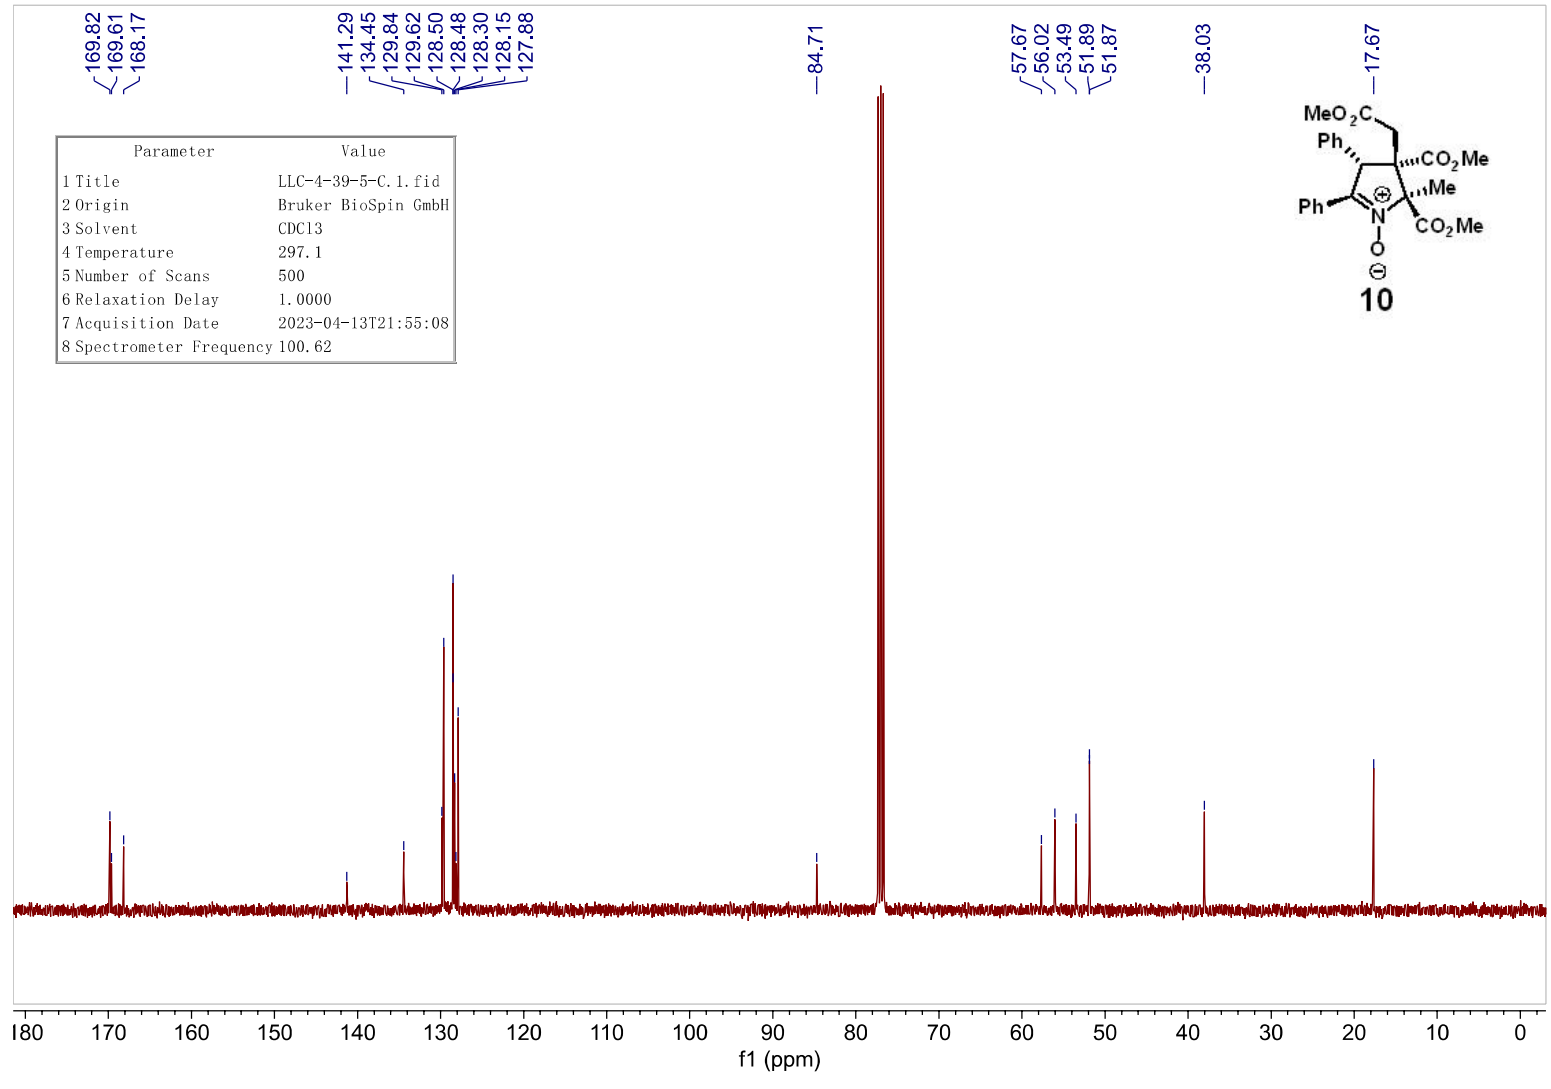

8.31  
8.30  
8.30  
8.29  
8.28  
7.35  
7.34  
7.33  
7.33  
7.32  
7.31  
7.30  
7.29  
7.29  
7.22  
7.21  
7.20  
7.19  
7.19  
7.18  
7.18  
-5.62

3.82  
3.80  
3.45  
3.13  
3.09  
2.02  
1.97  
1.80

| Parameter                | Value                |
|--------------------------|----------------------|
| 1 Title                  | LLC-4-39-4-B. 1. fid |
| 2 Origin                 | Bruker BioSpin GmbH  |
| 3 Solvent                | CDCl3                |
| 4 Temperature            | 296.6                |
| 5 Number of Scans        | 4                    |
| 6 Relaxation Delay       | 5.0000               |
| 7 Acquisition Date       | 2023-04-14T01:52:43  |
| 8 Spectrometer Frequency | 400.13               |

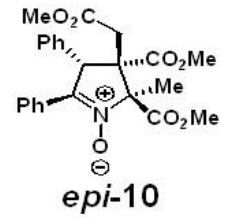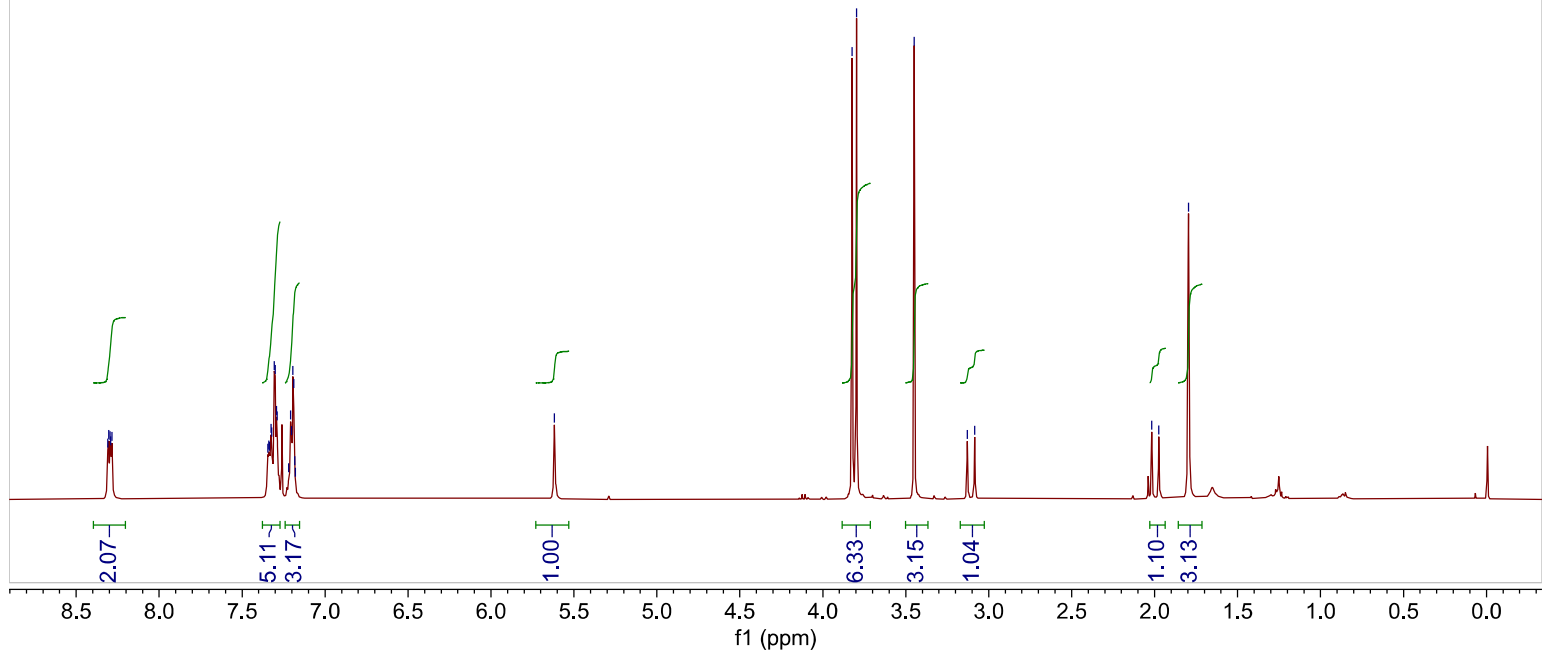

171.99  
171.00  
169.07  
143.76  
136.05  
131.09  
130.40  
128.63  
128.32  
128.17  
128.04  
84.46  
53.84  
53.09  
52.91  
52.79  
51.84  
36.55

| Parameter                | Value                 |
|--------------------------|-----------------------|
| 1 Title                  | LLC-4-39-4B-C. 1. fid |
| 2 Origin                 | Bruker BioSpin GmbH   |
| 3 Solvent                | CDCl3                 |
| 4 Temperature            | 297.2                 |
| 5 Number of Scans        | 1000                  |
| 6 Relaxation Delay       | 1.0000                |
| 7 Acquisition Date       | 2023-04-14T08:28:05   |
| 8 Spectrometer Frequency | 100.62                |

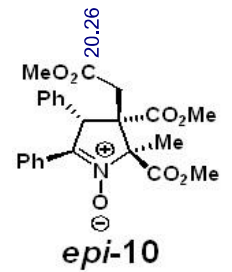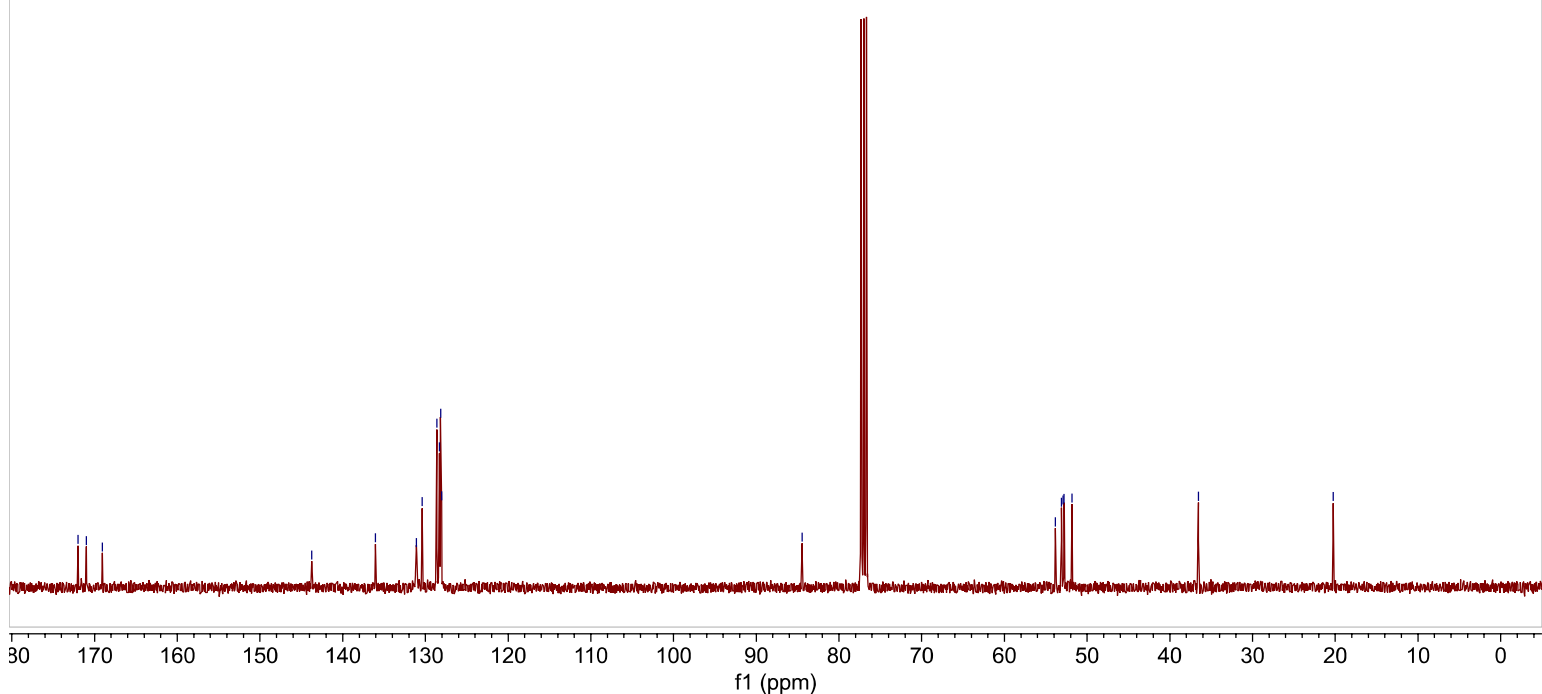

7.69  
7.68  
7.67  
7.66  
7.21  
7.21  
7.20  
7.19  
7.16  
7.15  
7.14  
7.13  
7.12  
7.11

5.59

3.73  
3.72

3.29  
3.09  
3.04

1.98  
1.94

1.56

| Parameter                | Value               |
|--------------------------|---------------------|
| 1 Title                  | LLC-4-66-H2.1.fid   |
| 2 Origin                 | Bruker BioSpin GmbH |
| 3 Solvent                | CDC13               |
| 4 Temperature            | 296.7               |
| 5 Number of Scans        | 4                   |
| 6 Relaxation Delay       | 5.0000              |
| 7 Acquisition Date       | 2023-04-26T20:58:40 |
| 8 Spectrometer Frequency | 400.13              |

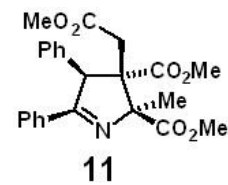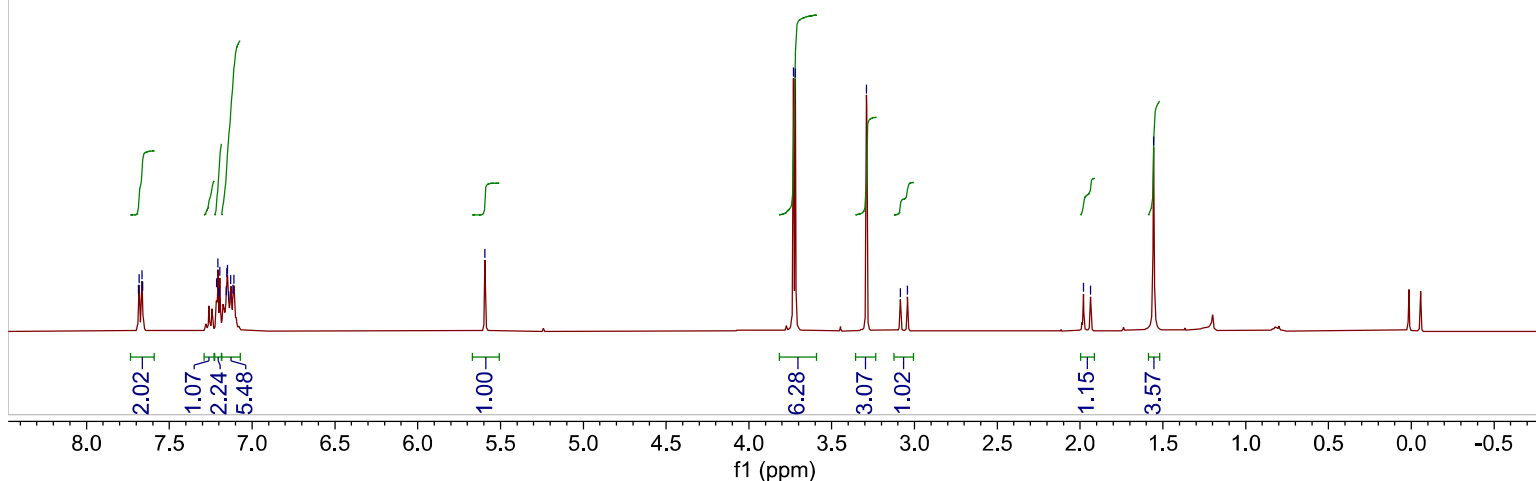

174.25  
173.38  
172.65  
171.49

135.67  
132.98  
130.56  
128.89  
128.23  
128.21  
127.51

82.94  
77.33  
77.01  
76.69

60.75  
60.11  
52.35  
52.33  
51.52

36.67

| Parameter                | Value               |
|--------------------------|---------------------|
| 1 Title                  | LLC-4-66-C          |
| 2 Origin                 | Varian              |
| 3 Solvent                | cdcl3               |
| 4 Temperature            | 25.0                |
| 5 Number of Scans        | 1000                |
| 6 Relaxation Delay       | 1.0000              |
| 7 Acquisition Date       | 2023-04-26T17:02:44 |
| 8 Spectrometer Frequency | 100.56              |

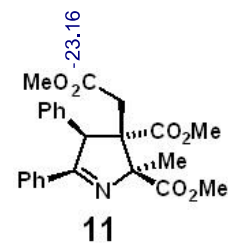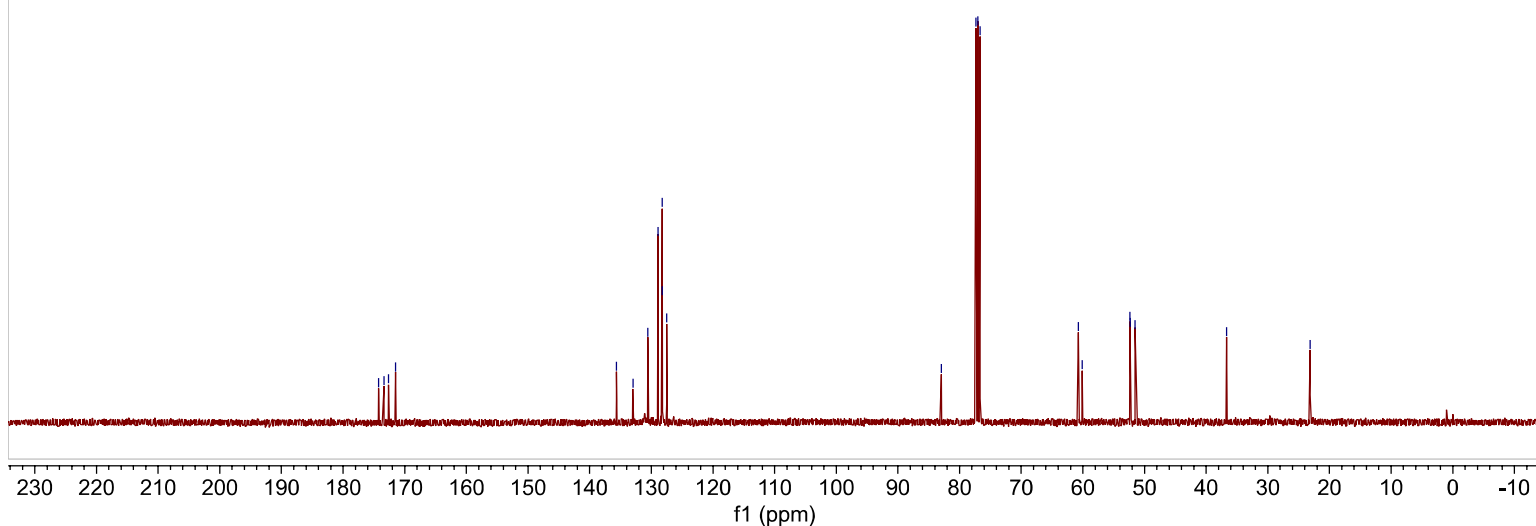

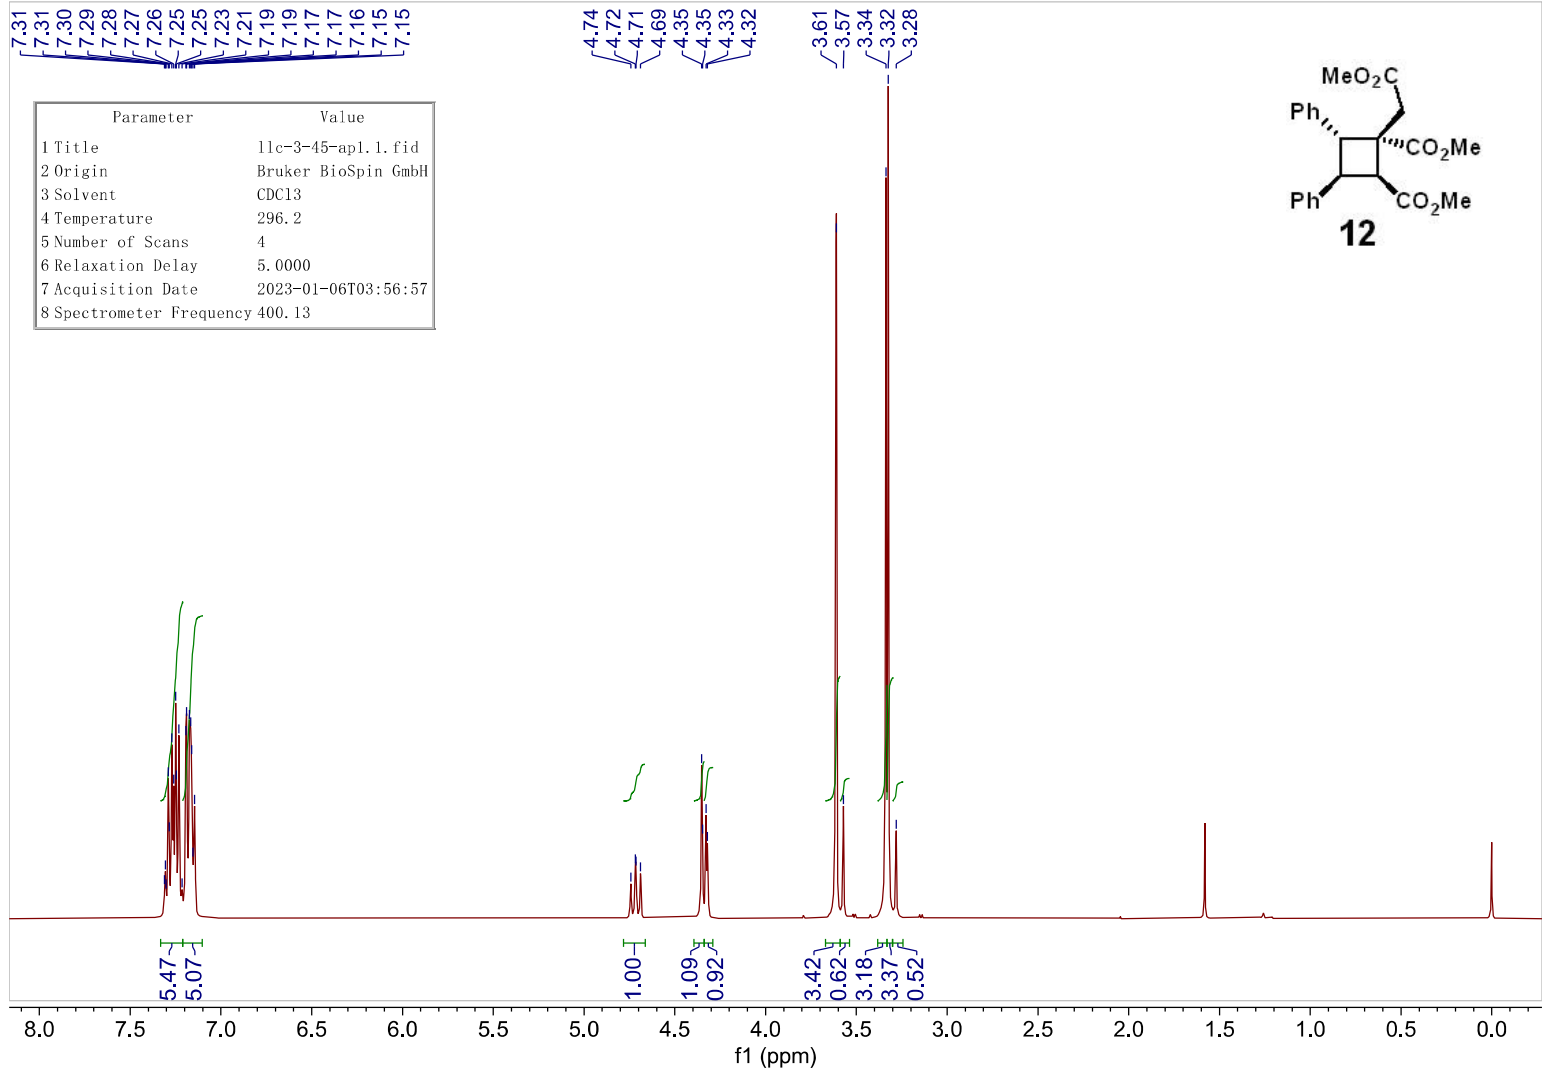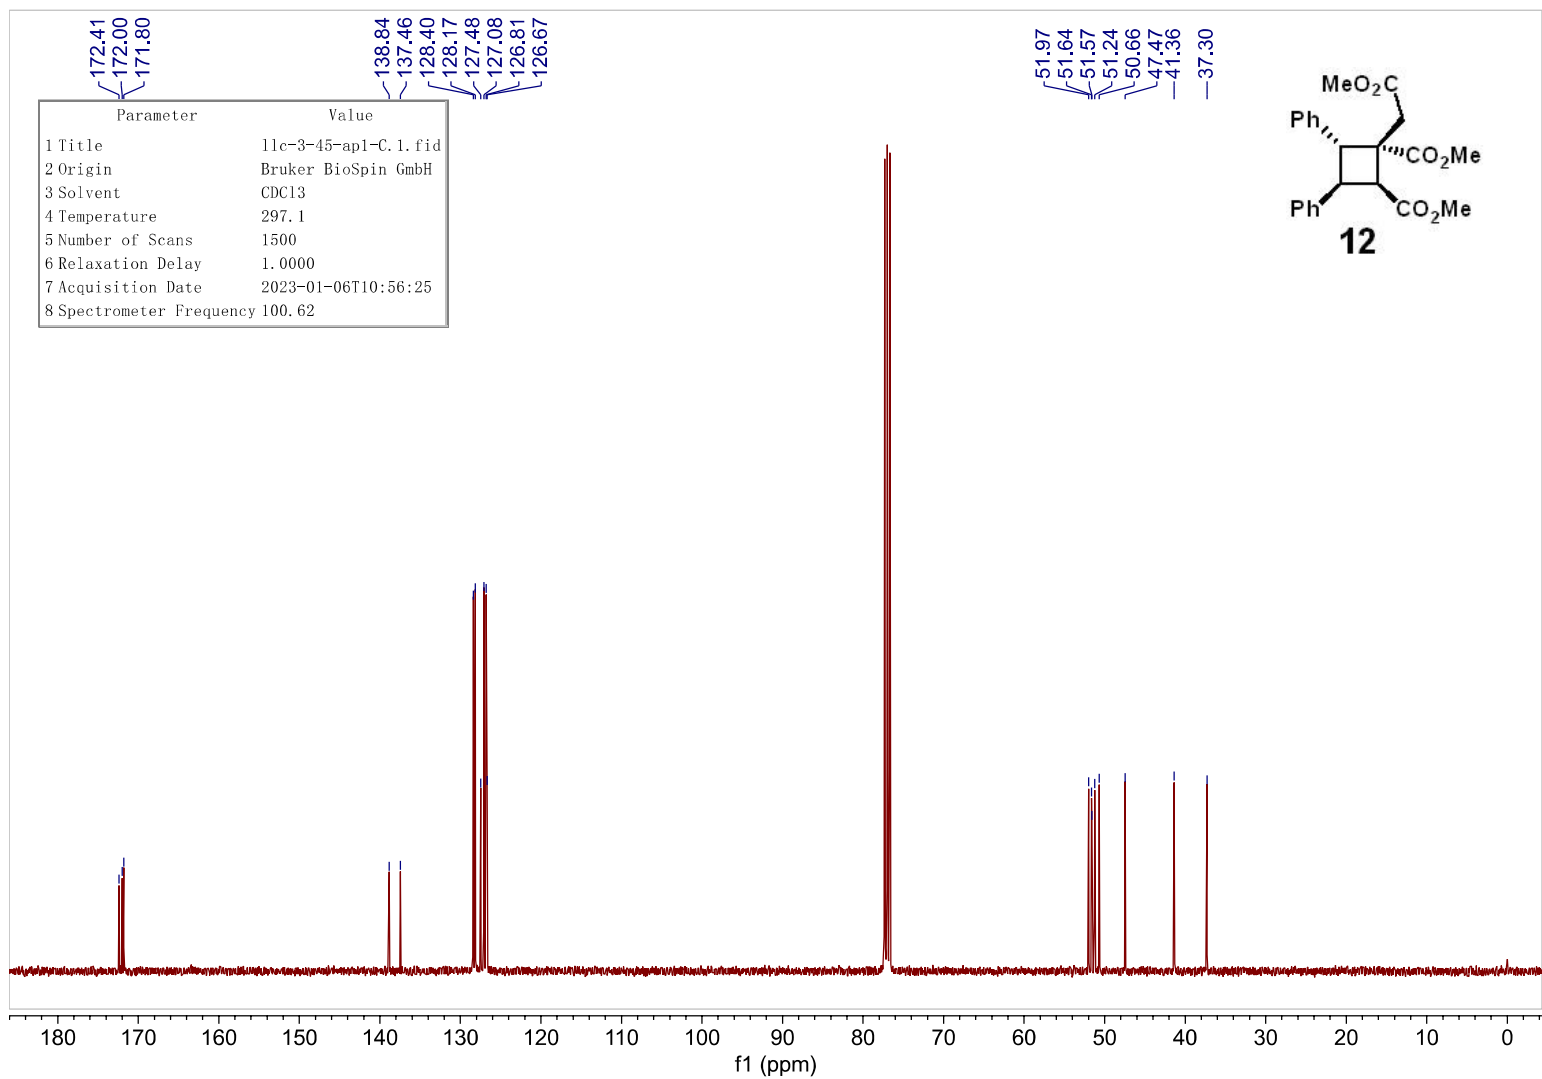

7.27  
7.26  
7.25  
7.25  
7.24  
7.24  
7.23  
7.23  
7.22  
7.21  
7.20  
7.19  
7.19  
7.17  
7.16  
7.15  
7.14  
7.13  
7.10  
7.10  
7.08

4.49  
3.64  
3.64  
3.57  
3.57  
3.53  
3.53  
3.36  
3.36  
3.29  
3.29  
3.27  
3.27  
3.23

1.78  
1.78

| Parameter                | Value               |
|--------------------------|---------------------|
| 1 Title                  | LLC-4-78-1-H        |
| 2 Origin                 | Varian              |
| 3 Solvent                | cdcl3               |
| 4 Temperature            | 25.0                |
| 5 Number of Scans        | 4                   |
| 6 Relaxation Delay       | 5.0000              |
| 7 Acquisition Date       | 2023-05-01T06:09:07 |
| 8 Spectrometer Frequency | 399.89              |

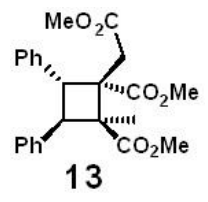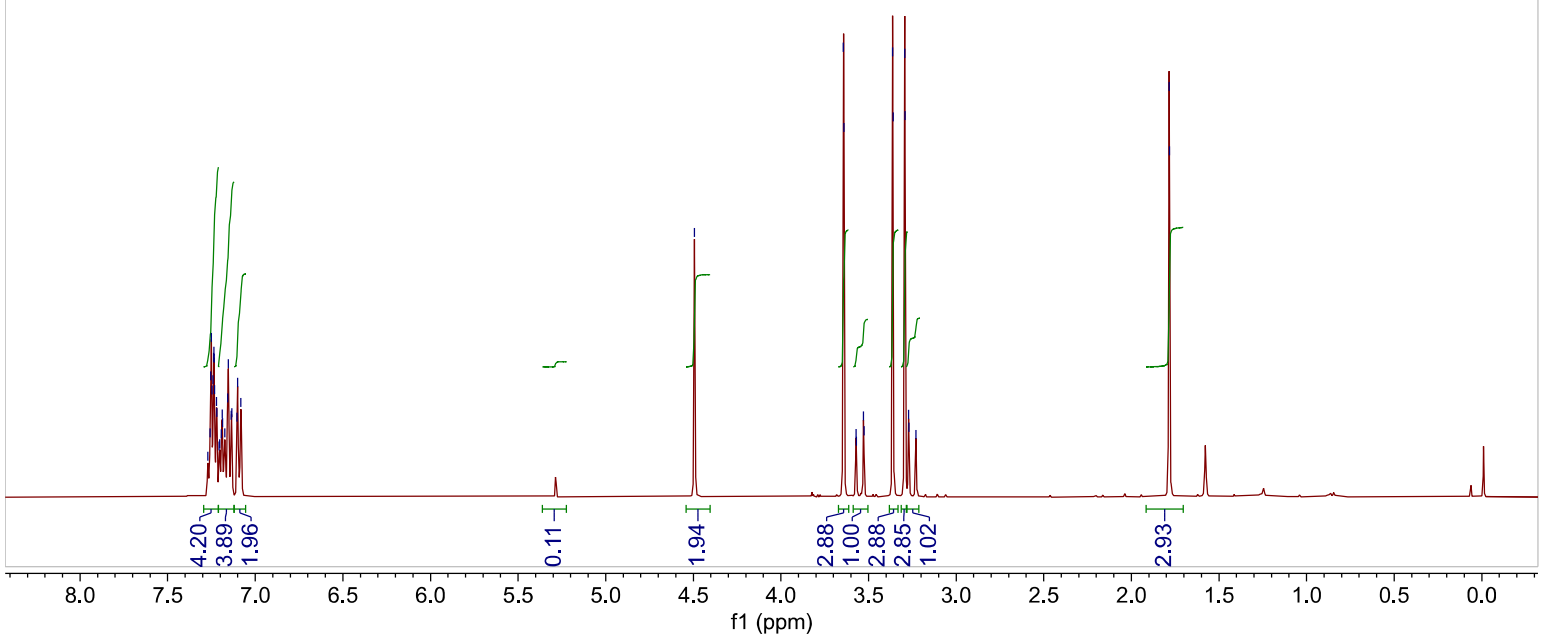

172.95  
171.97  
171.94  
139.08  
138.94  
128.13  
128.12  
127.00  
126.74  
126.70  
126.59

56.61  
55.20  
51.53  
51.51  
49.80  
47.60  
39.15

20.67

| Parameter                | Value               |
|--------------------------|---------------------|
| 1 Title                  | LLC-4-78-1-C        |
| 2 Origin                 | Varian              |
| 3 Solvent                | cdcl3               |
| 4 Temperature            | 25.0                |
| 5 Number of Scans        | 512                 |
| 6 Relaxation Delay       | 1.0000              |
| 7 Acquisition Date       | 2023-05-01T06:09:55 |
| 8 Spectrometer Frequency | 100.56              |

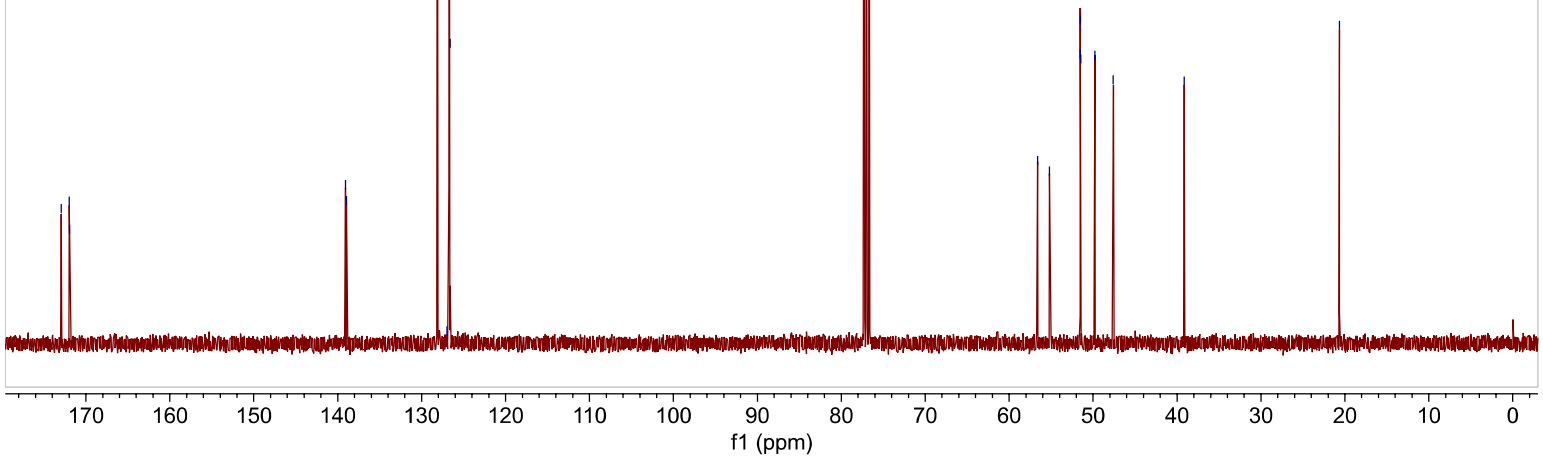



7.58  
7.57  
7.56  
7.55  
7.38  
7.36  
7.35  
7.34  
7.34  
7.30  
7.29  
7.28  
7.26

4.42  
4.41  
4.41  
3.88  
3.86  
3.85  
3.84  
3.84  
3.83  
3.82  
3.78  
3.78  
3.77  
3.76  
3.75  
2.94  
2.92  
2.91  
2.88  
2.50  
2.48

1.99  
1.98  
1.96  
1.94  
1.61  
1.41

| Parameter                | Value                    |
|--------------------------|--------------------------|
| 1 Title                  | llc-2-195-3-Bruker.1.fid |
| 2 Origin                 | Bruker BioSpin GmbH      |
| 3 Solvent                | CDCl3                    |
| 4 Temperature            | 296.6                    |
| 5 Number of Scans        | 4                        |
| 6 Relaxation Delay       | 5.0000                   |
| 7 Acquisition Date       | 2022-12-06T21:38:35      |
| 8 Spectrometer Frequency | 400.13                   |

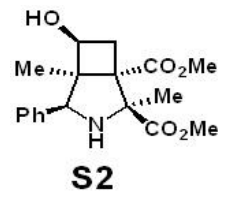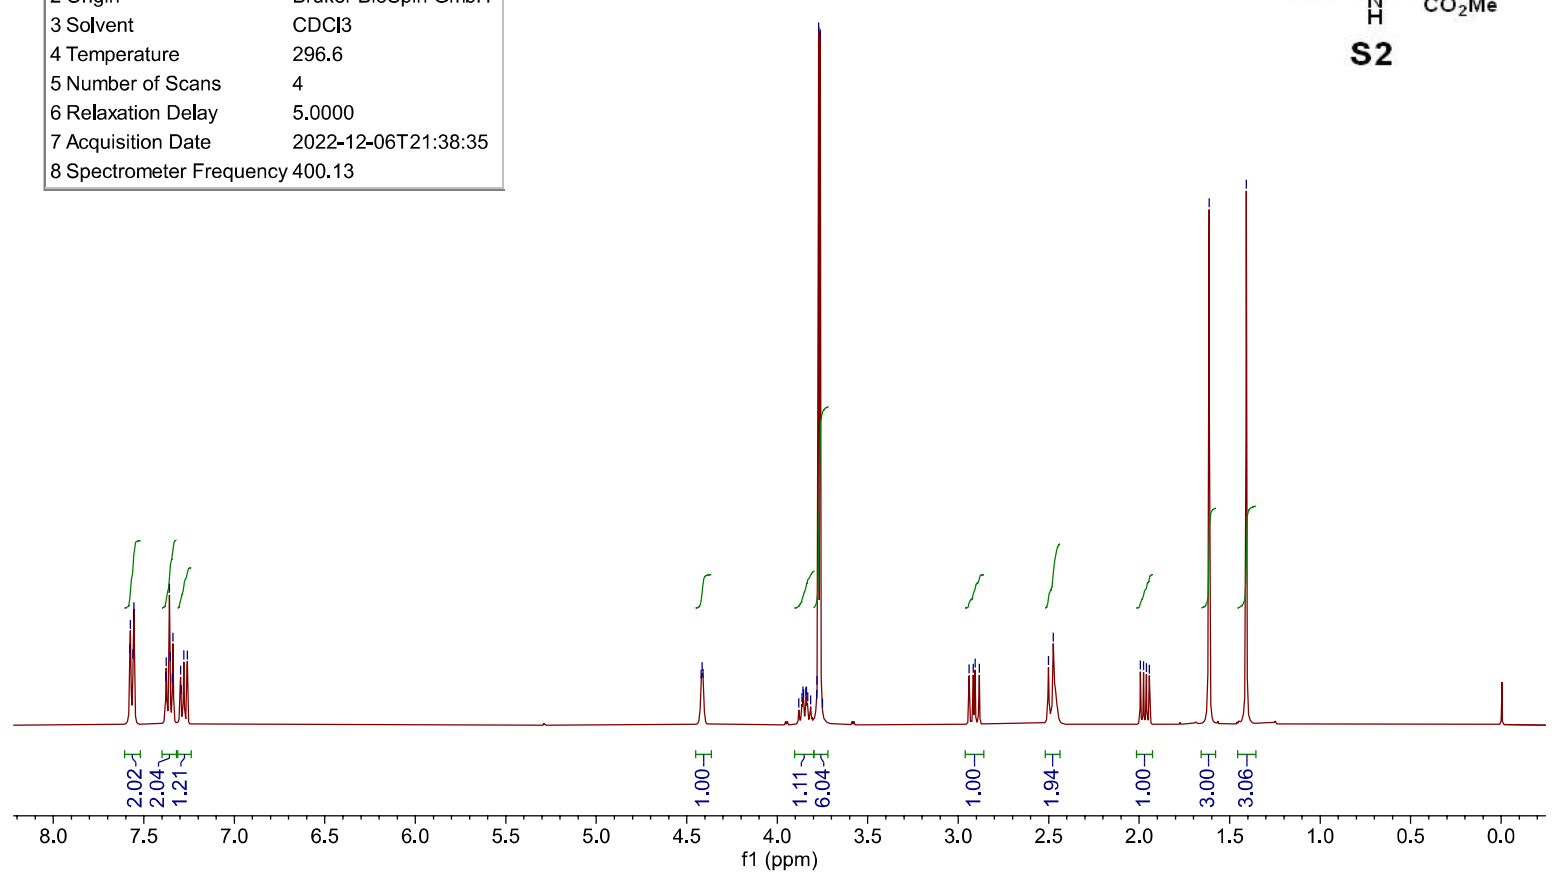

173.85  
171.80

138.32

128.61  
127.59  
126.79

72.27  
69.05  
66.54

58.00  
55.79  
52.29  
51.71

36.97

23.55  
22.67

| Parameter                | Value                    |
|--------------------------|--------------------------|
| 1 Title                  | llc-2-195-3-Carbon.1.fid |
| 2 Origin                 | Bruker BioSpin GmbH      |
| 3 Solvent                | CDCl3                    |
| 4 Temperature            | 297.2                    |
| 5 Number of Scans        | 300                      |
| 6 Relaxation Delay       | 1.0000                   |
| 7 Acquisition Date       | 2022-12-06T21:50:57      |
| 8 Spectrometer Frequency | 100.62                   |

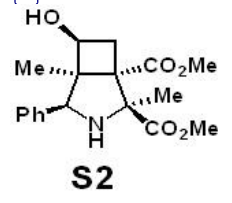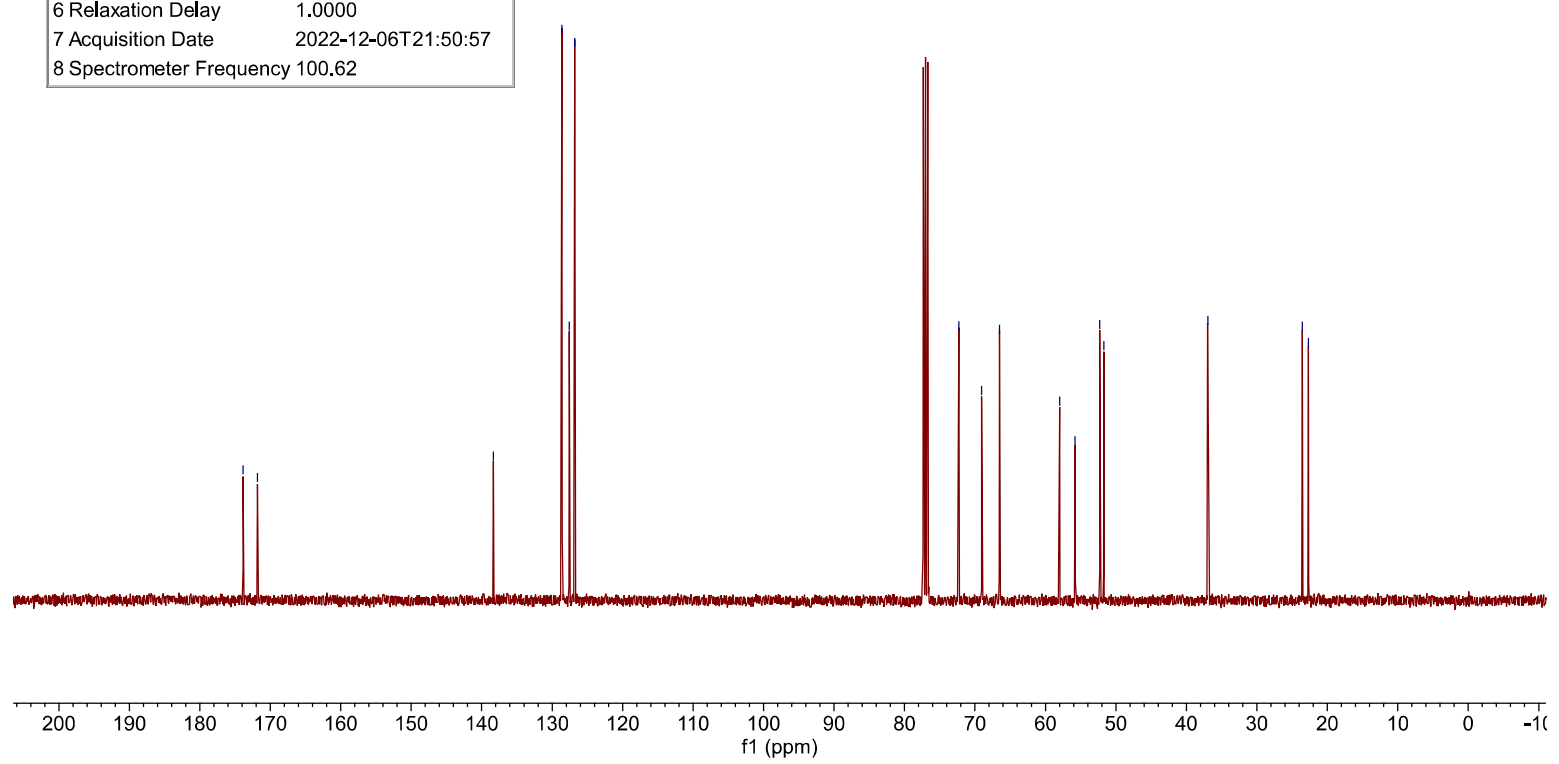

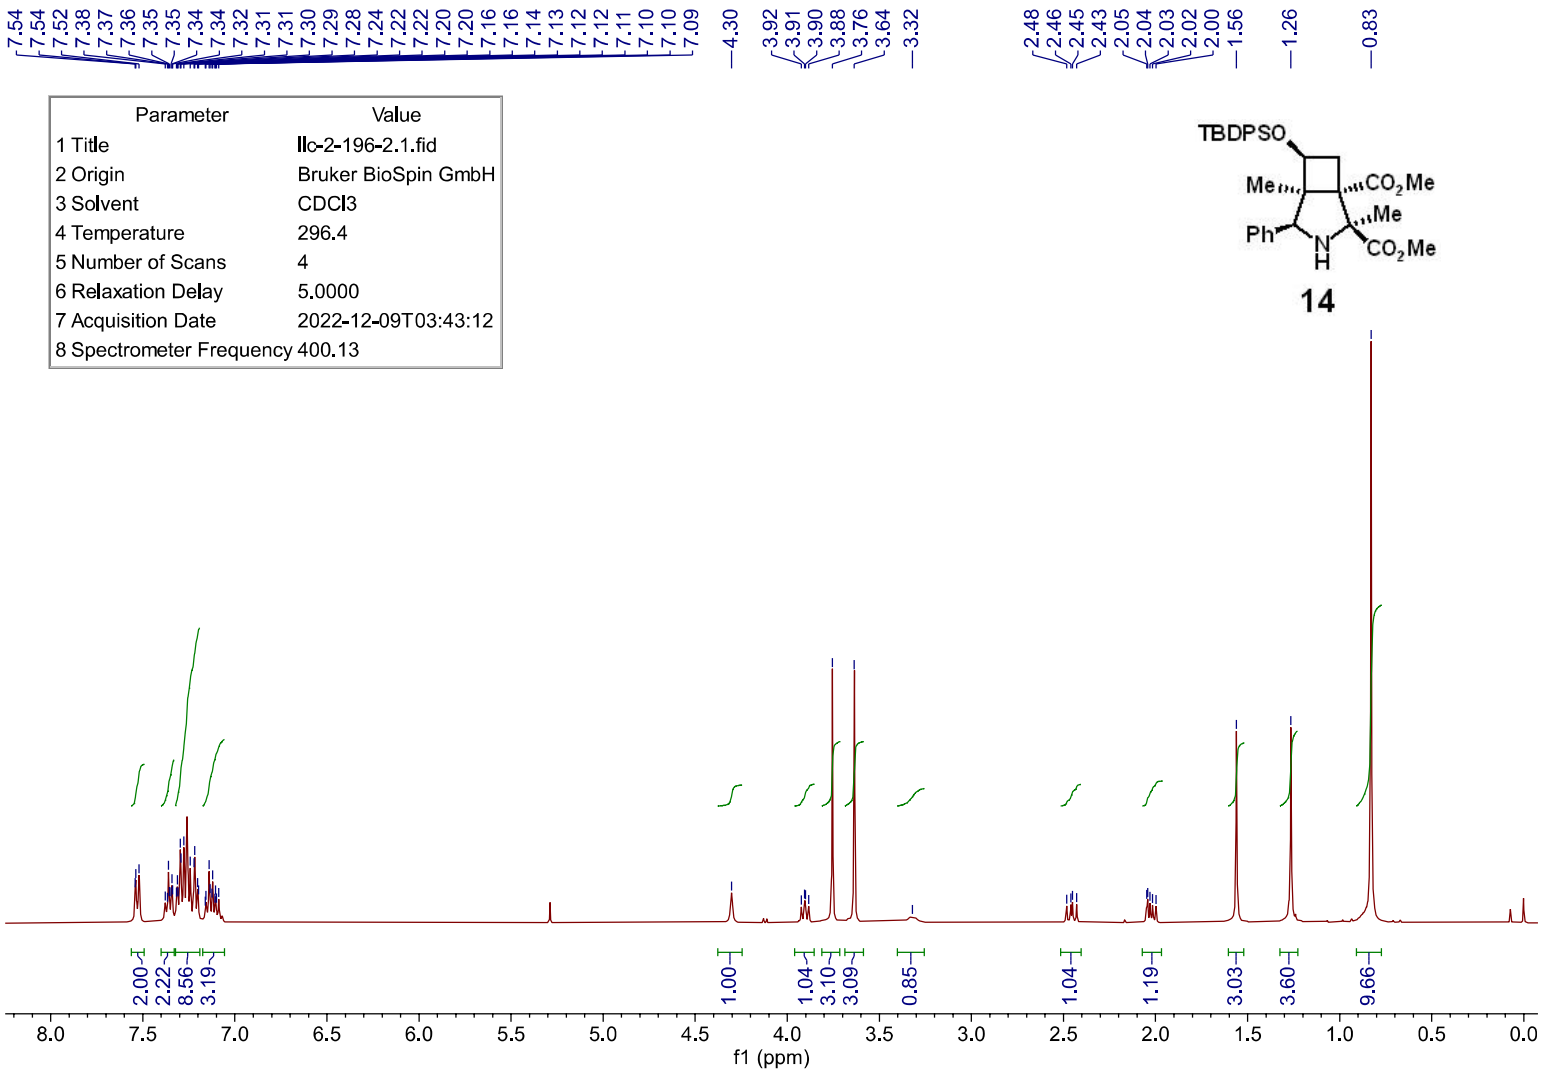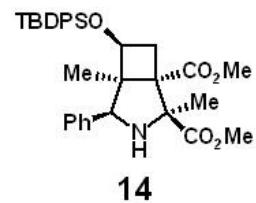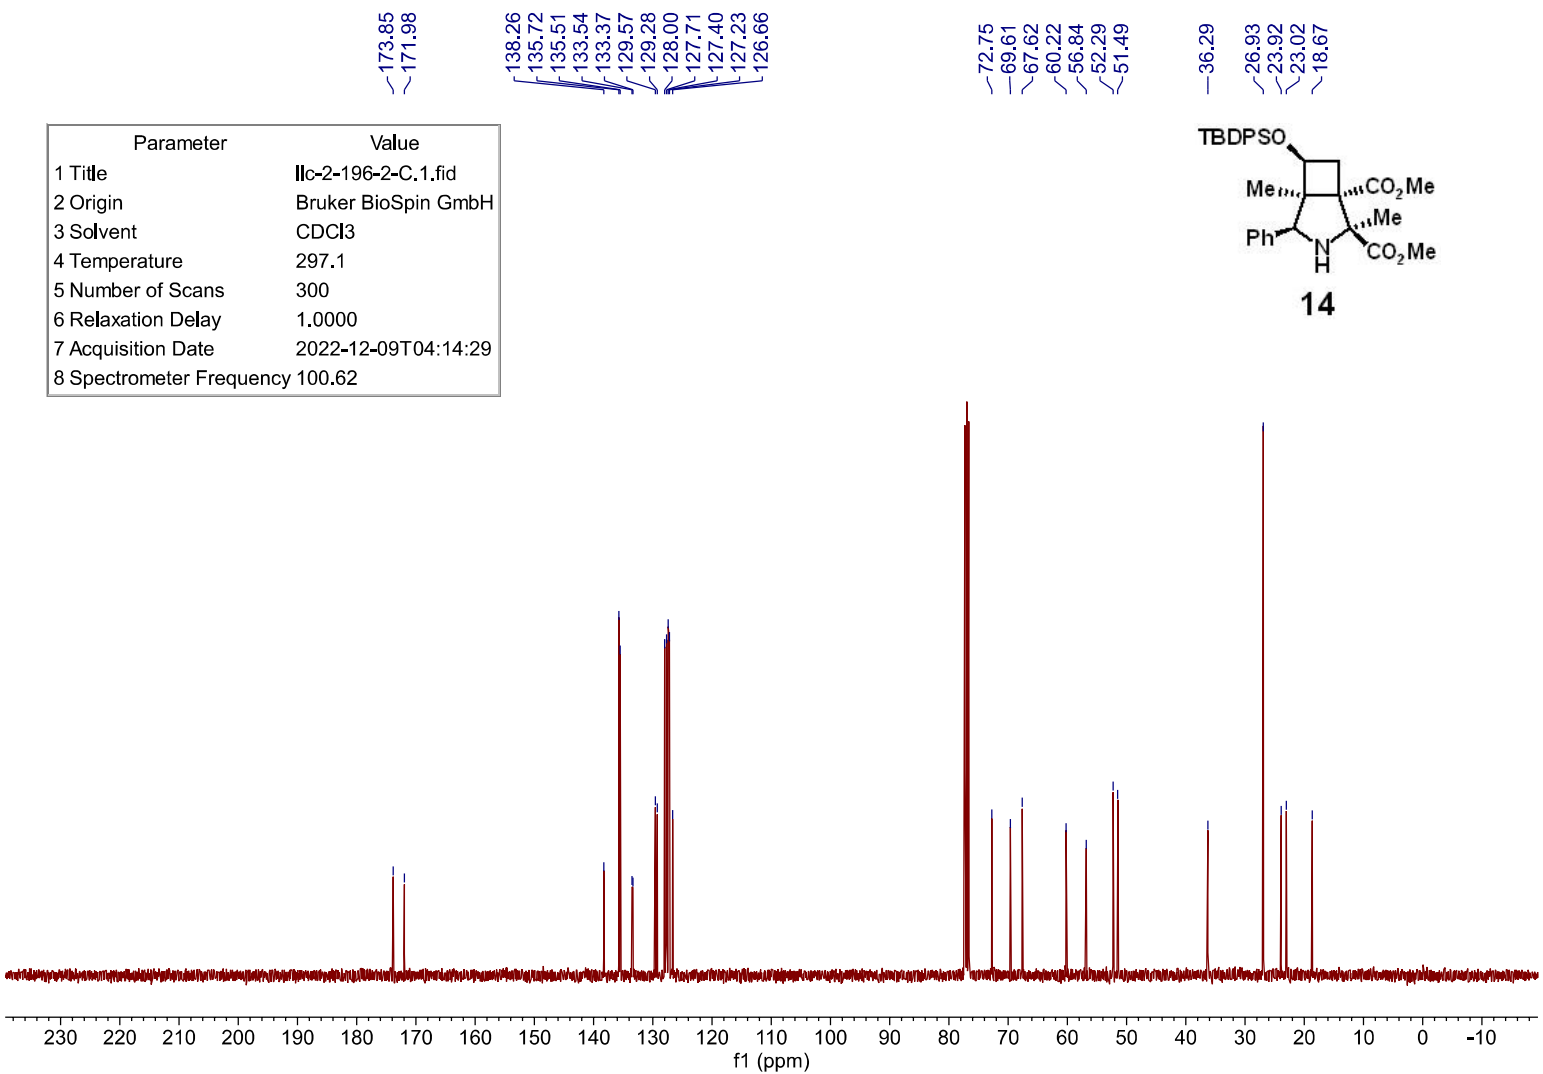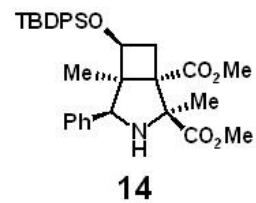

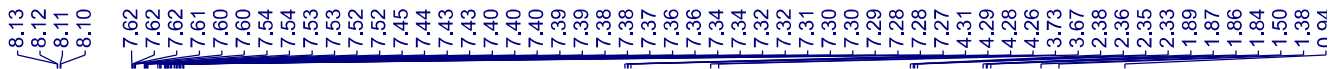

| Parameter                | Value                    |
|--------------------------|--------------------------|
| 1 Title                  | llc-2-199-Bruker-H.1.fid |
| 2 Origin                 | Bruker BioSpin GmbH      |
| 3 Solvent                | CDCl3                    |
| 4 Temperature            | 296.7                    |
| 5 Number of Scans        | 4                        |
| 6 Relaxation Delay       | 5.0000                   |
| 7 Acquisition Date       | 2022-12-10T02:29:10      |
| 8 Spectrometer Frequency | 400.13                   |

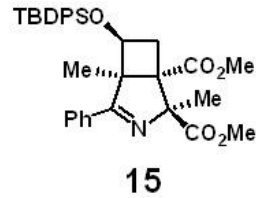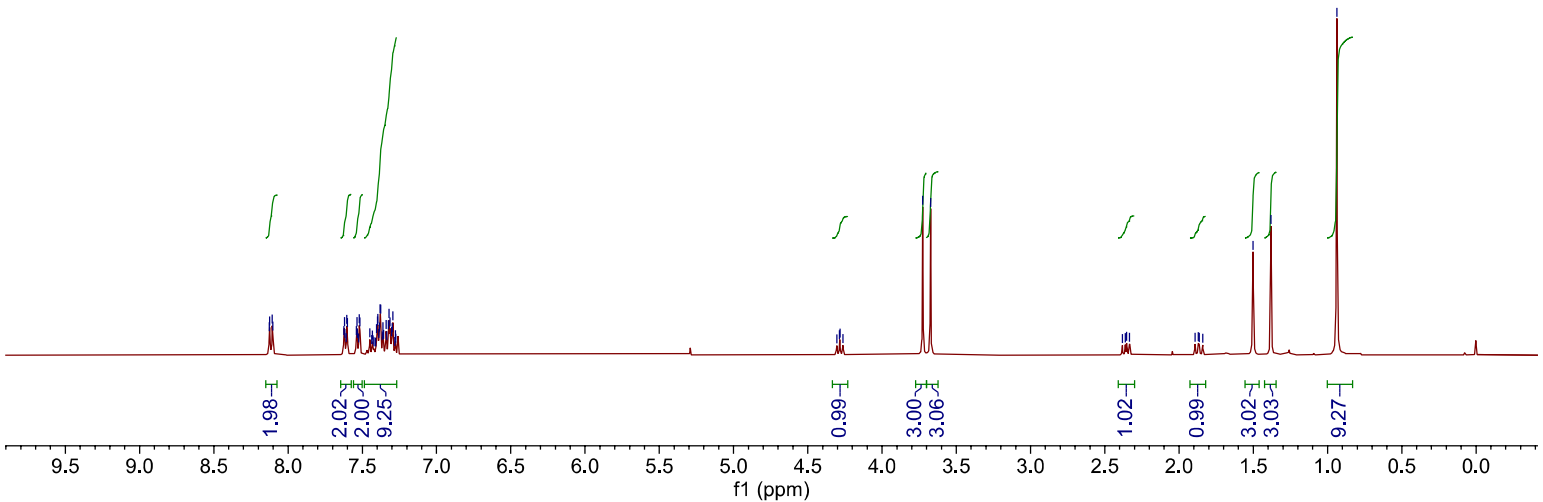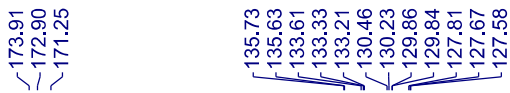

| Parameter                | Value                    |
|--------------------------|--------------------------|
| 1 Title                  | llc-2-199-Bruker-C.1.fid |
| 2 Origin                 | Bruker BioSpin GmbH      |
| 3 Solvent                | CDCl3                    |
| 4 Temperature            | 297.3                    |
| 5 Number of Scans        | 300                      |
| 6 Relaxation Delay       | 1.0000                   |
| 7 Acquisition Date       | 2022-12-10T02:42:01      |
| 8 Spectrometer Frequency | 100.62                   |

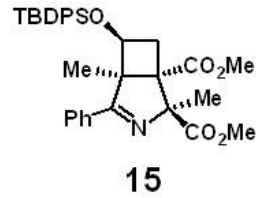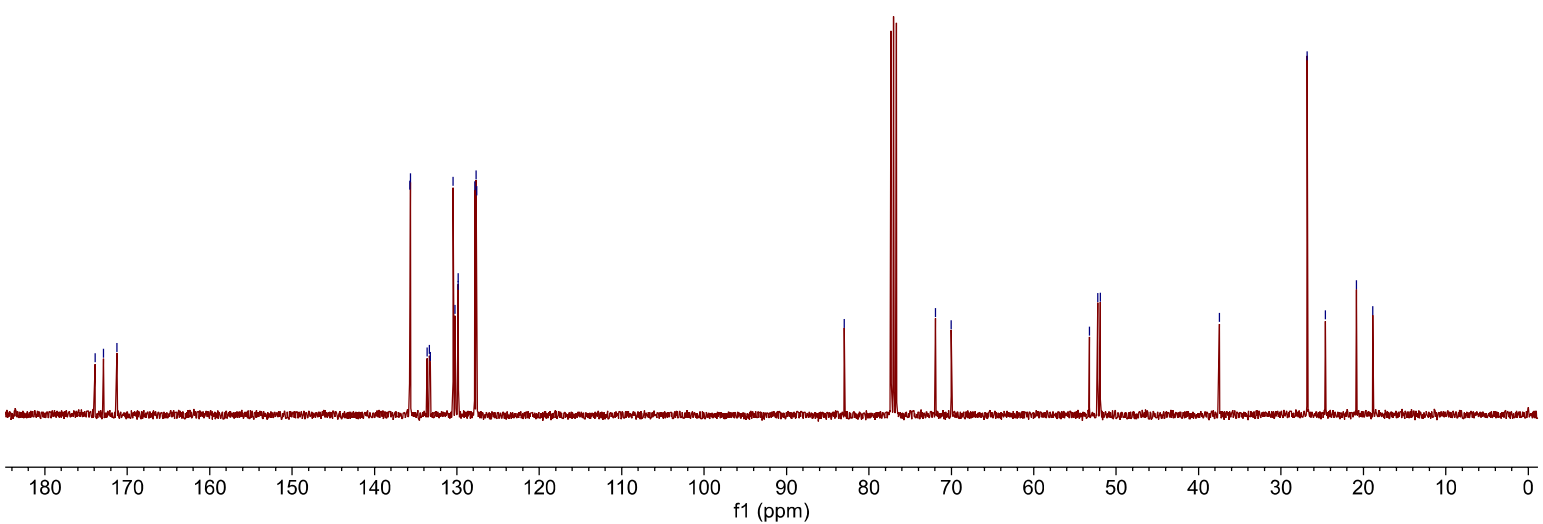

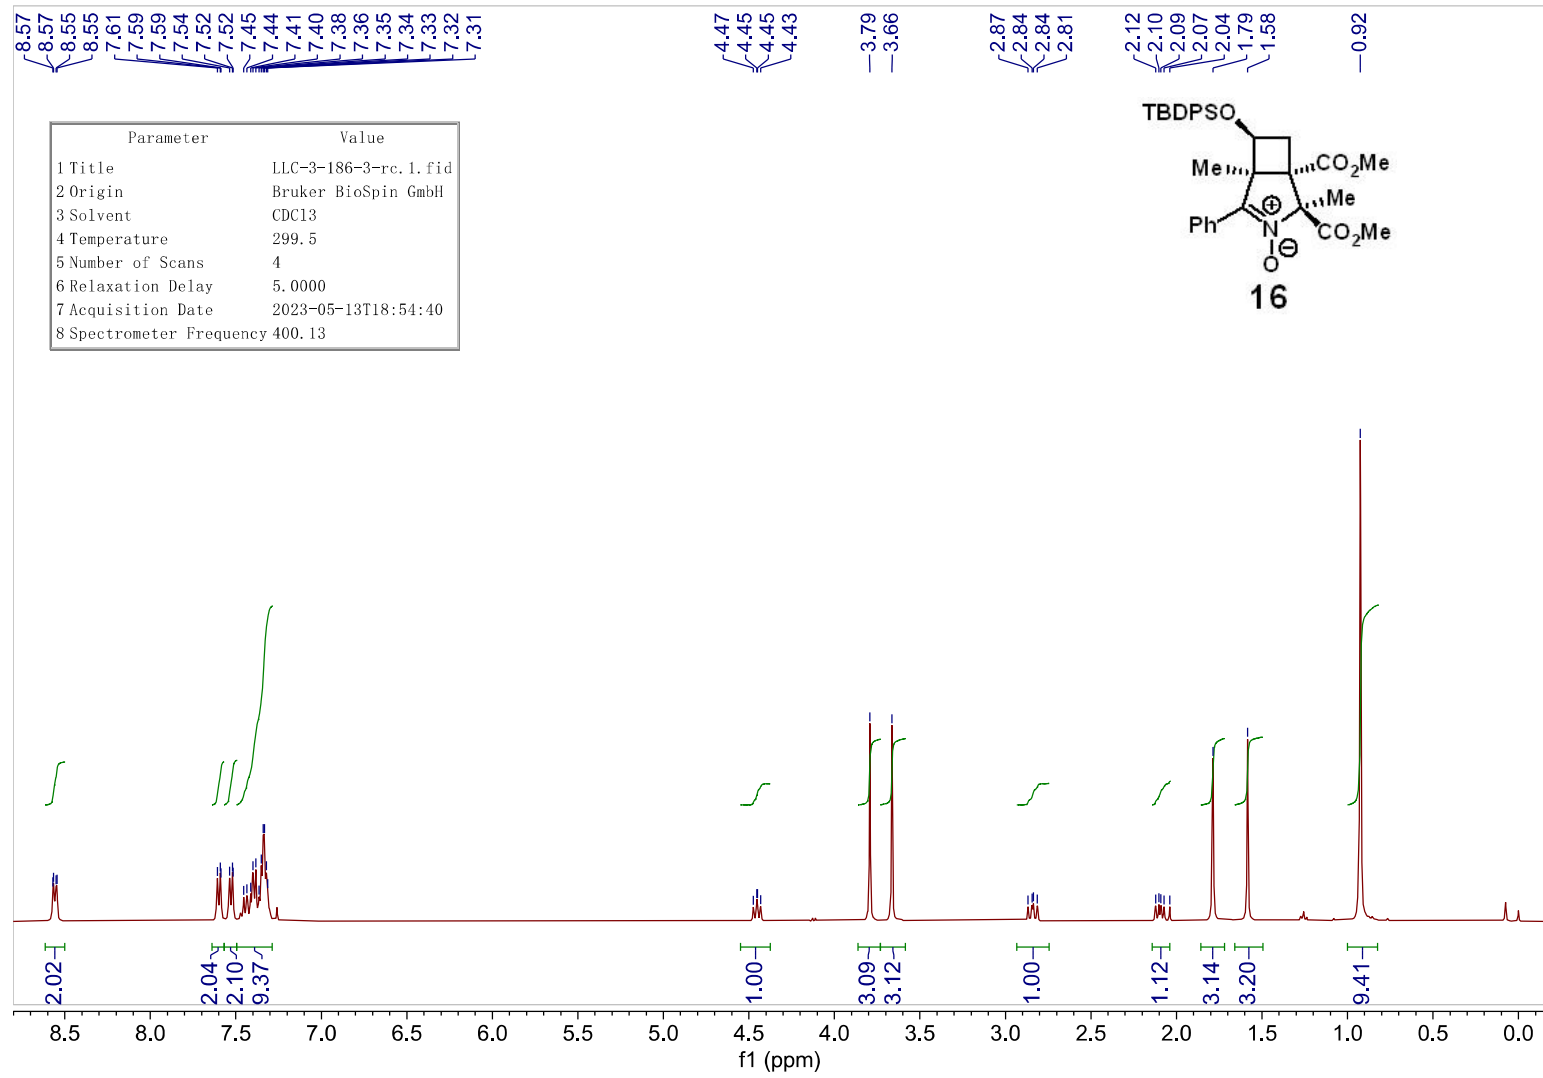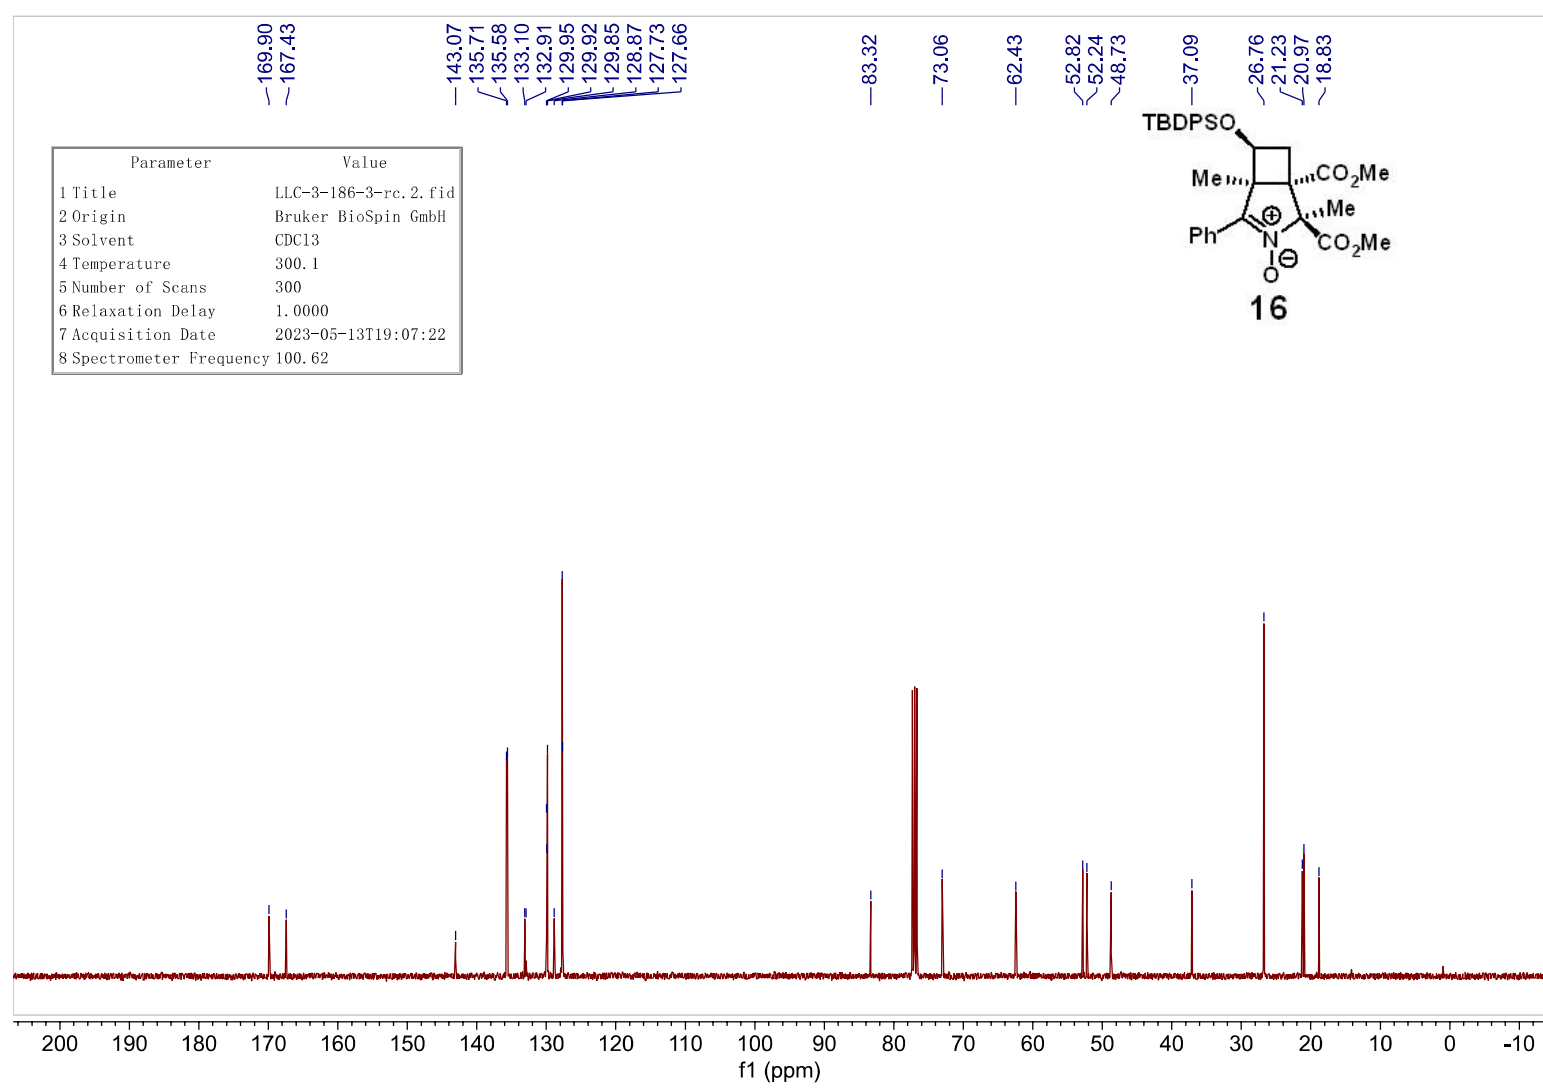

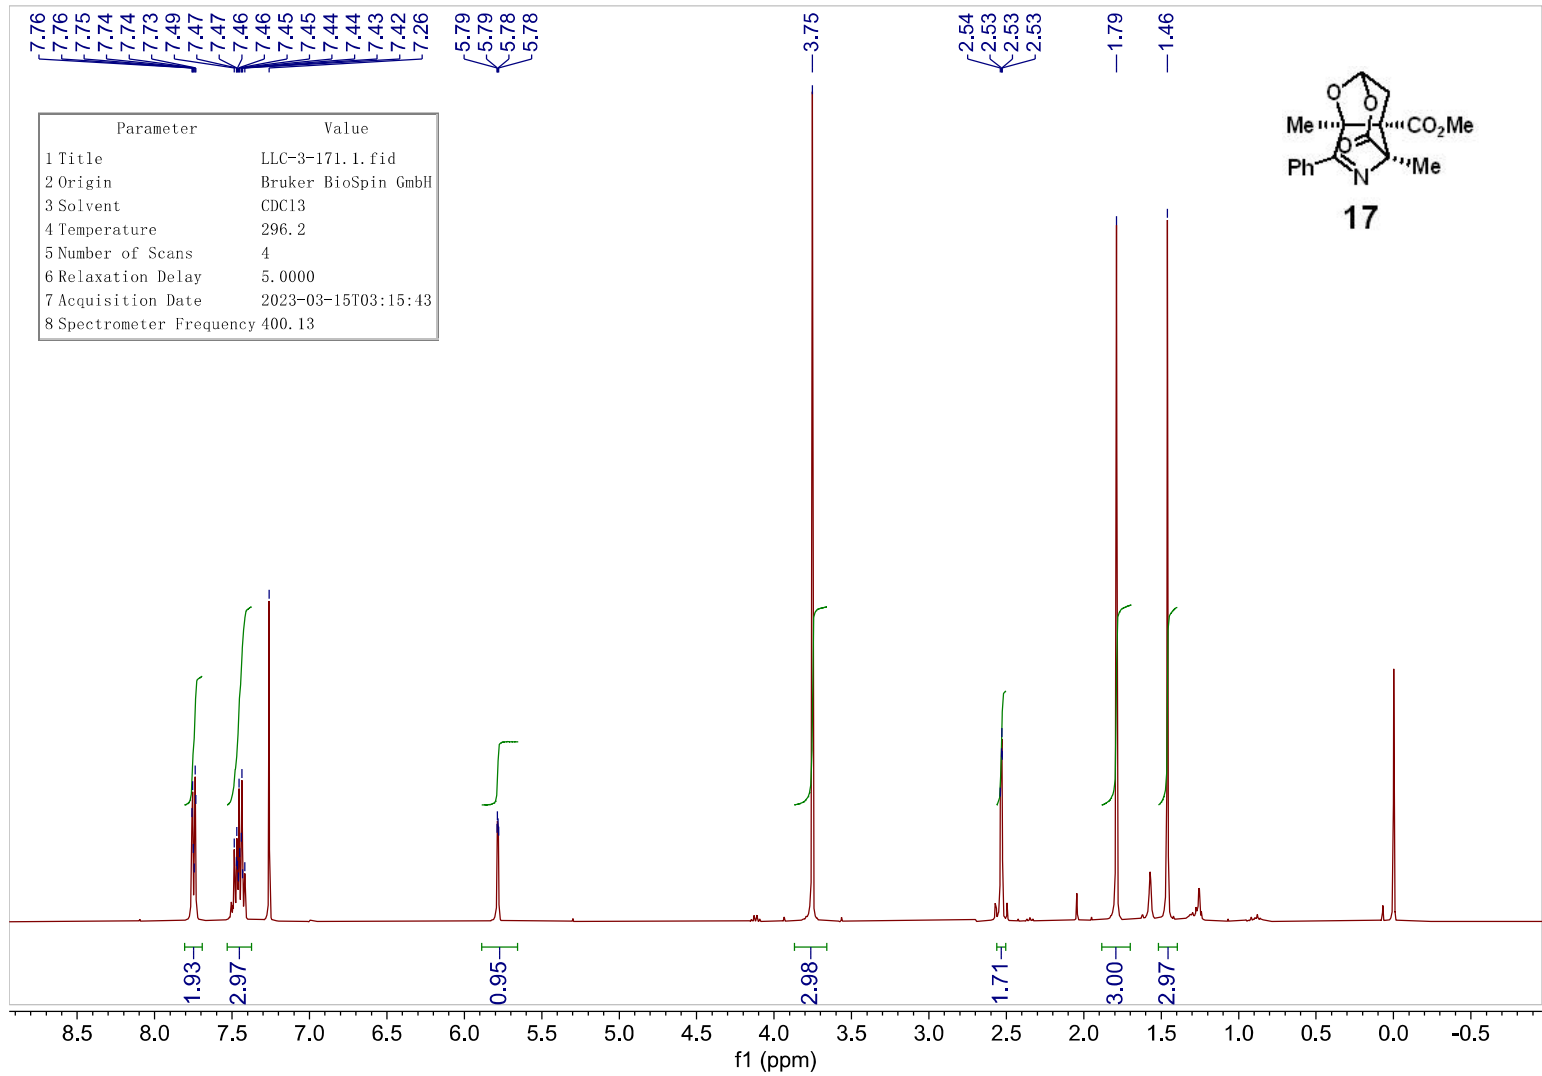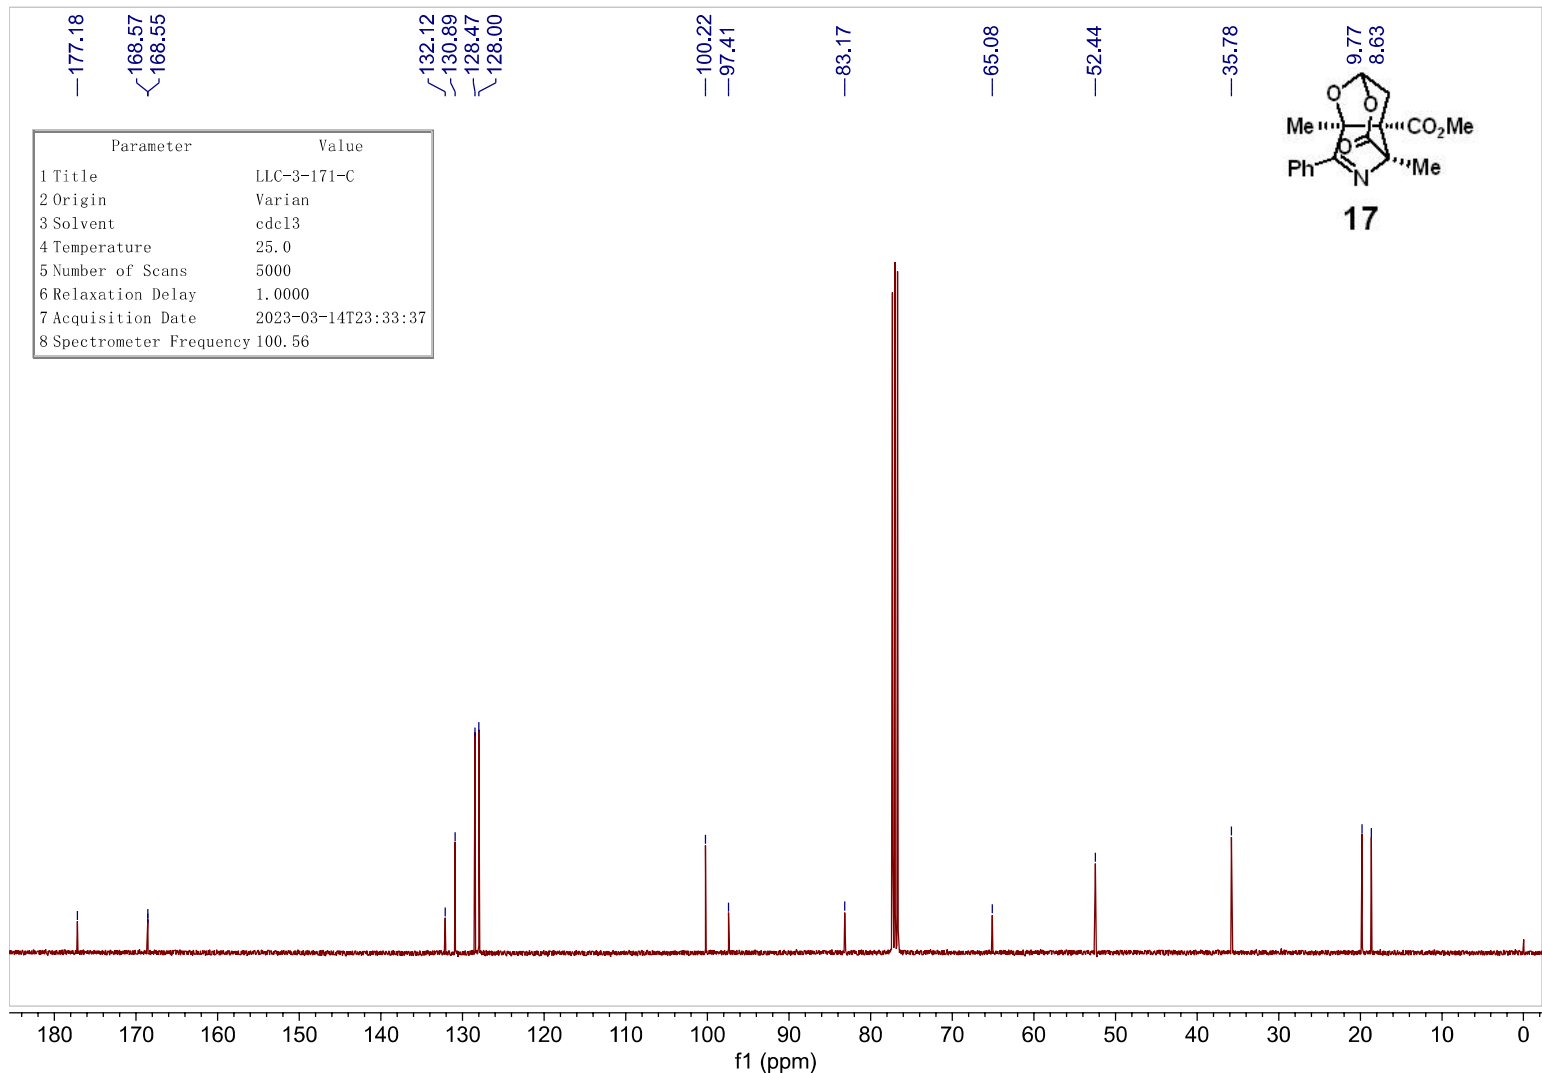

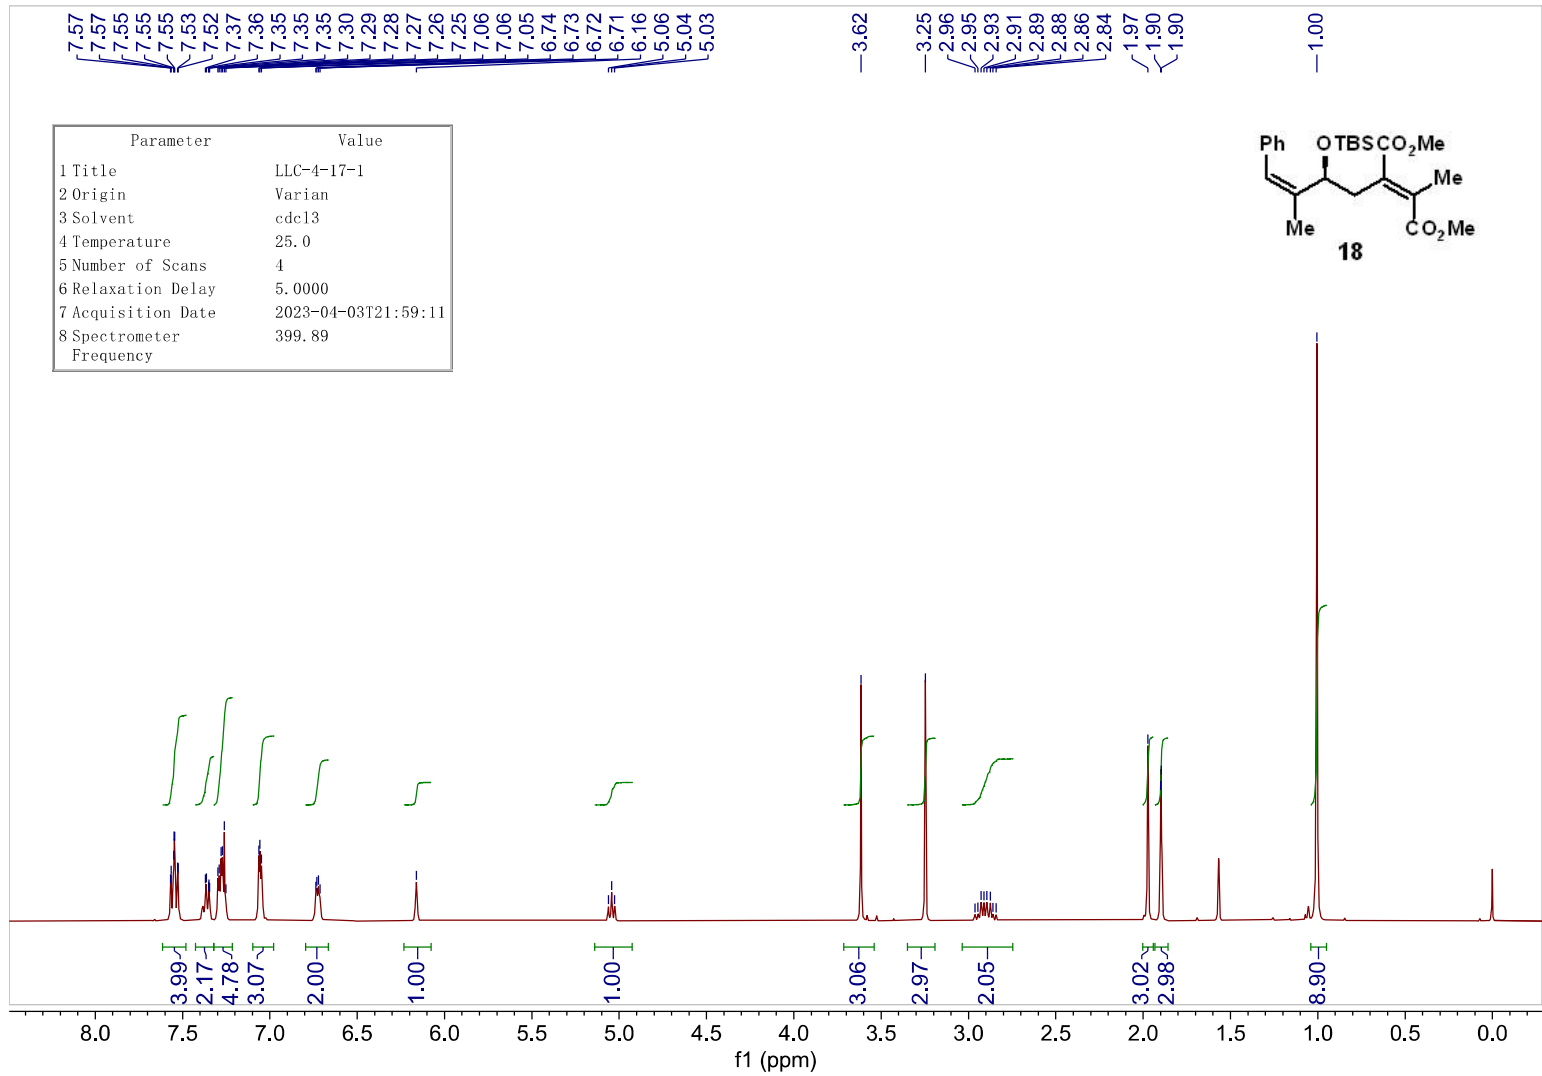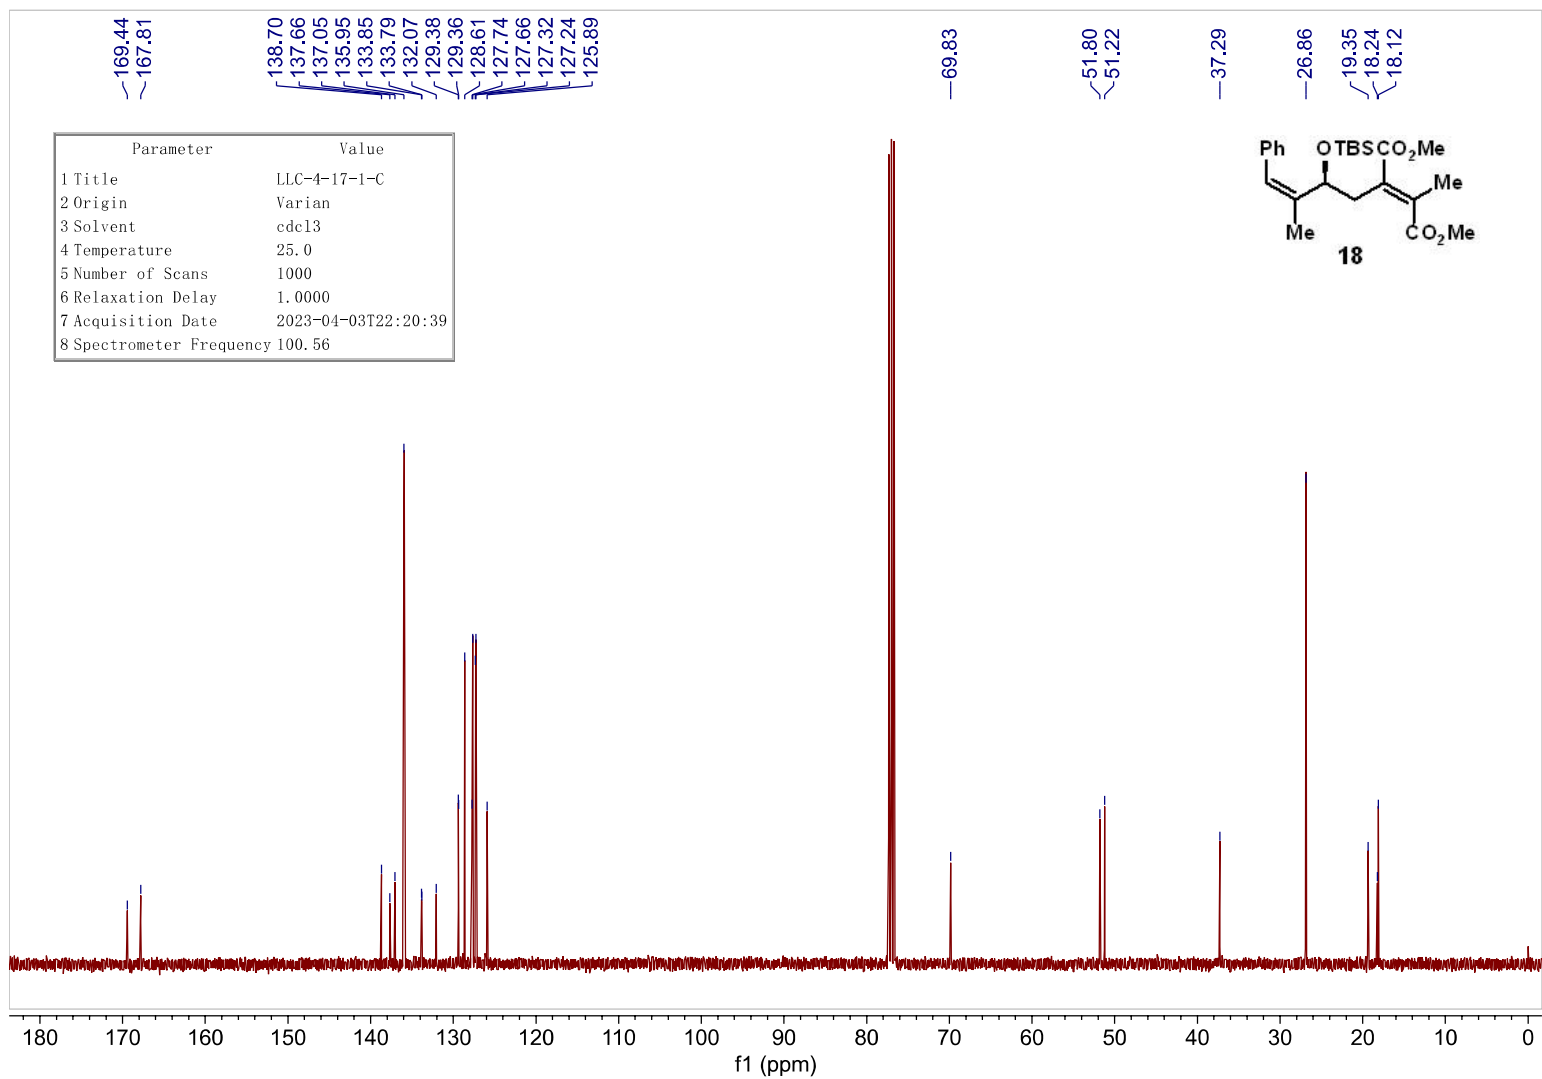

NOESY NMR spectrum of dimethyl 2-((*S,Z*)-2-((*tert*-butyldiphenylsilyl)oxy)-3-methyl-4-phenylbut-3-en-1-yl)-3-methylfumarate (18)

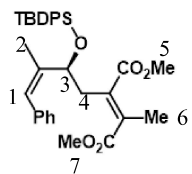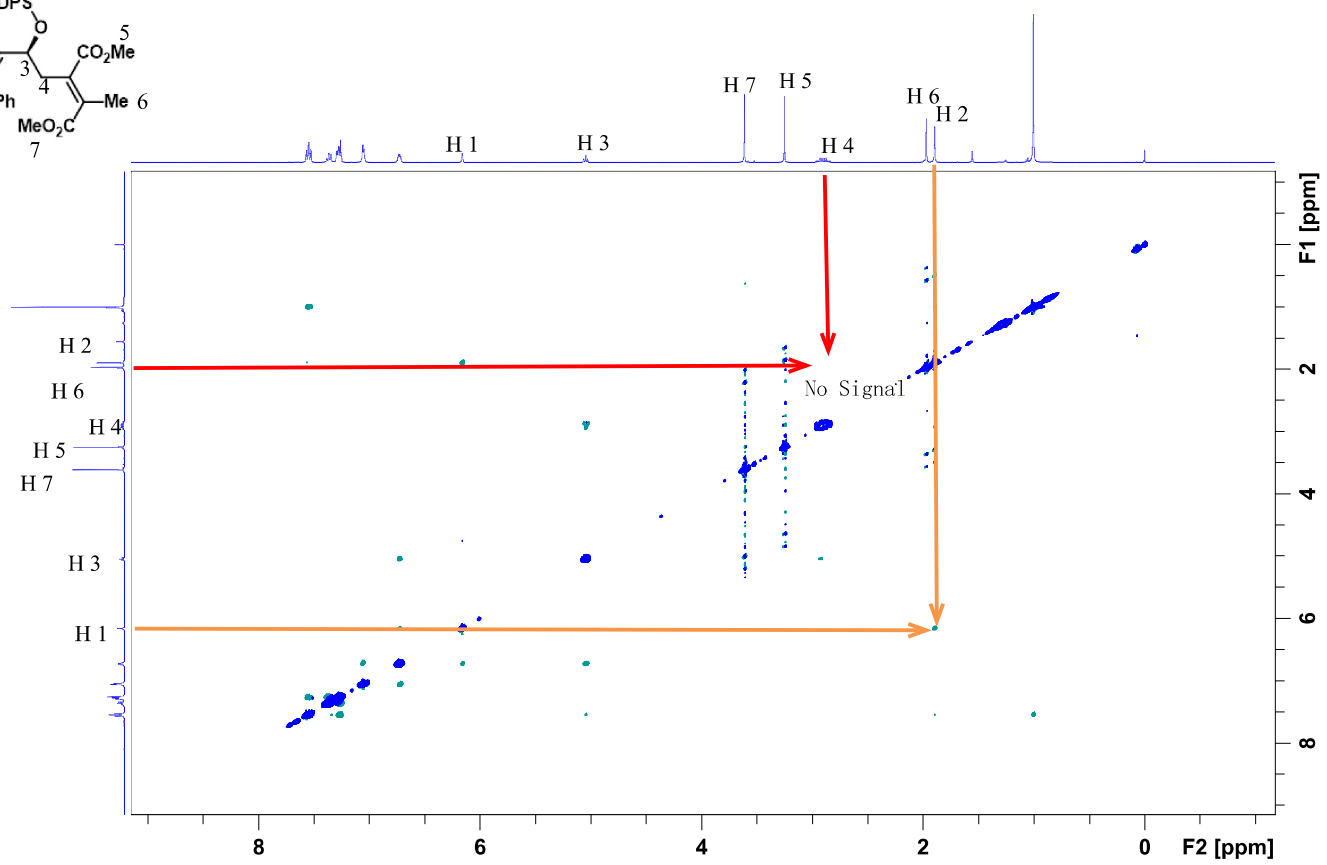

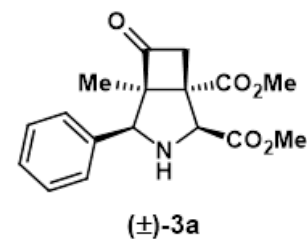

## <Sample Information>

Sample Name : LLC-1-30-0514  
 Sample ID :  
 Data Filename : LLC-1-30-0514.lcd

Method Filename : IC,1ml 10%IPA in Hex;40min.lcm  
 Batch Filename : 1.lcb  
 Vial # : 1-93  
 Injection Volume : 10 uL  
 Date Acquired : 5/14/2023 2:53:36 PM  
 Date Processed : 5/14/2023 3:33:39 PM

Sample Type : Unknown  
 Acquired by : System Administrator  
 Processed by : System Administrator

## <Chromatogram>

mAU

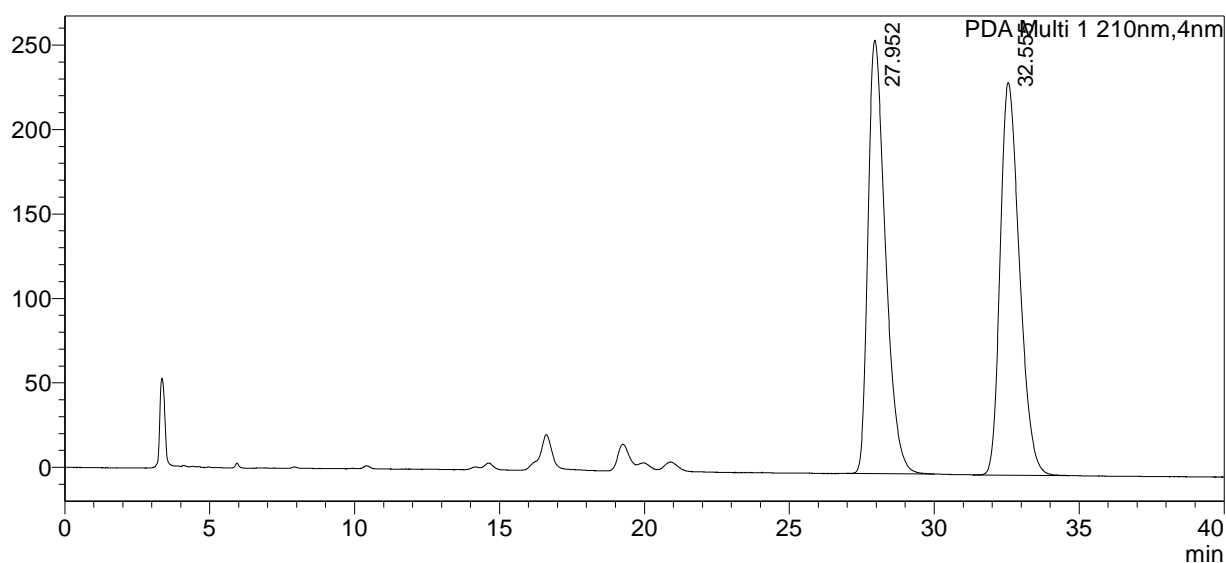

## <Peak Table>

PDA Ch1 210nm

| Peak# | Ret. Time | Area     | Height | Conc.  | Unit | Mark | Name |
|-------|-----------|----------|--------|--------|------|------|------|
| 1     | 27.952    | 10735921 | 256539 | 49.940 |      |      |      |
| 2     | 32.555    | 10761597 | 232453 | 50.060 |      |      |      |
| Total |           | 21497518 | 488991 |        |      |      |      |



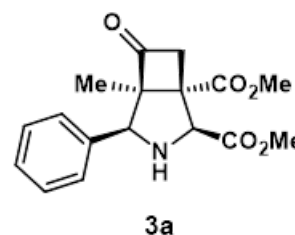

## <Sample Information>

Sample Name : LLC-4-95 IC-10%  
 Sample ID :  
 Data Filename : LLC-4-95 IC-10%.lcd

Method Filename : IC,1ml 10%IPA in Hex;60min.lcm  
 Batch Filename : 1.lcb  
 Vial # : 1-92  
 Injection Volume : 10 uL  
 Date Acquired : 5/14/2023 2:16:46 PM  
 Date Processed : 5/14/2023 2:53:06 PM

Sample Type : Unknown  
 Acquired by : System Administrator  
 Processed by : System Administrator

## <Chromatogram>

mAU

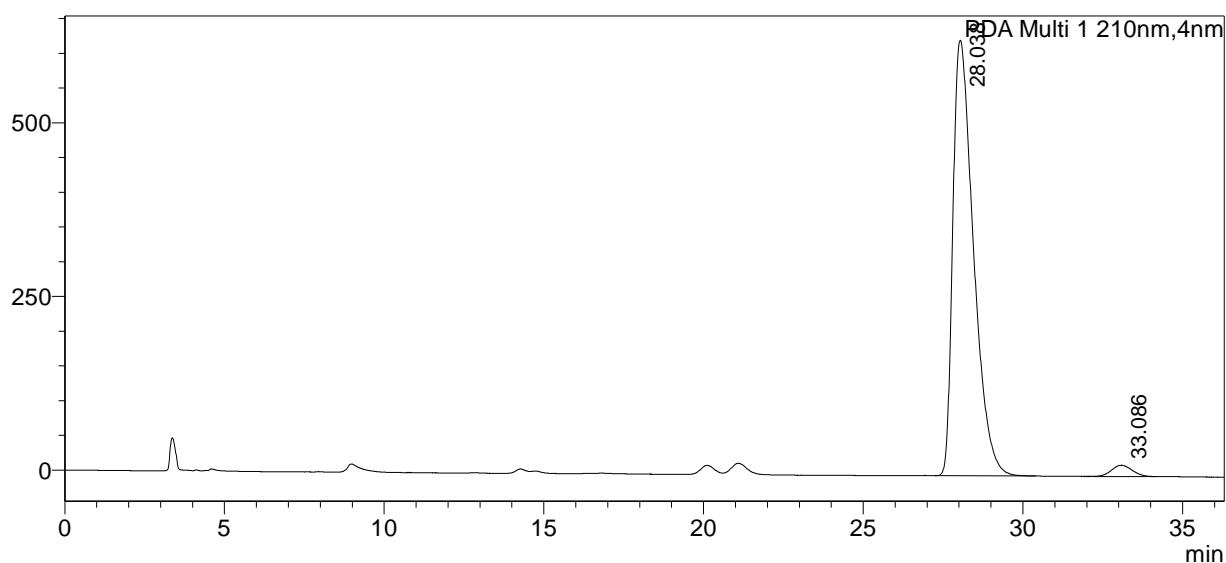

## <Peak Table>

PDA Ch1 210nm

| Peak# | Ret. Time | Area     | Height | Conc.  | Unit | Mark | Name |
|-------|-----------|----------|--------|--------|------|------|------|
| 1     | 28.038    | 28165494 | 626777 | 97.457 |      |      |      |
| 2     | 33.086    | 734853   | 16282  | 2.543  |      | V    |      |
| Total |           | 28900348 | 643059 |        |      |      |      |

## <Sample Information>

Sample Name : LLC-1-89 ADH 5%  
 Sample ID :  
 Data Filename : LLC-1-89 ADH 5%.lcd

Method Filename : AD-H; 1 ml; 5%IPA in Hex; 60min.lcm  
 Batch Filename : 20210901.lcb  
 Vial # : 1-50  
 Injection Volume : 10 uL  
 Date Acquired : 12/1/2021 7:50:02 PM  
 Date Processed : 12/1/2021 8:26:14 PM

Sample Type : Unknown  
 Acquired by : System Administrator  
 Processed by : System Administrator

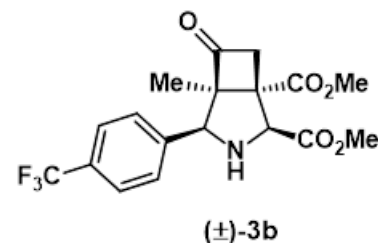

## <Chromatogram>

mAU

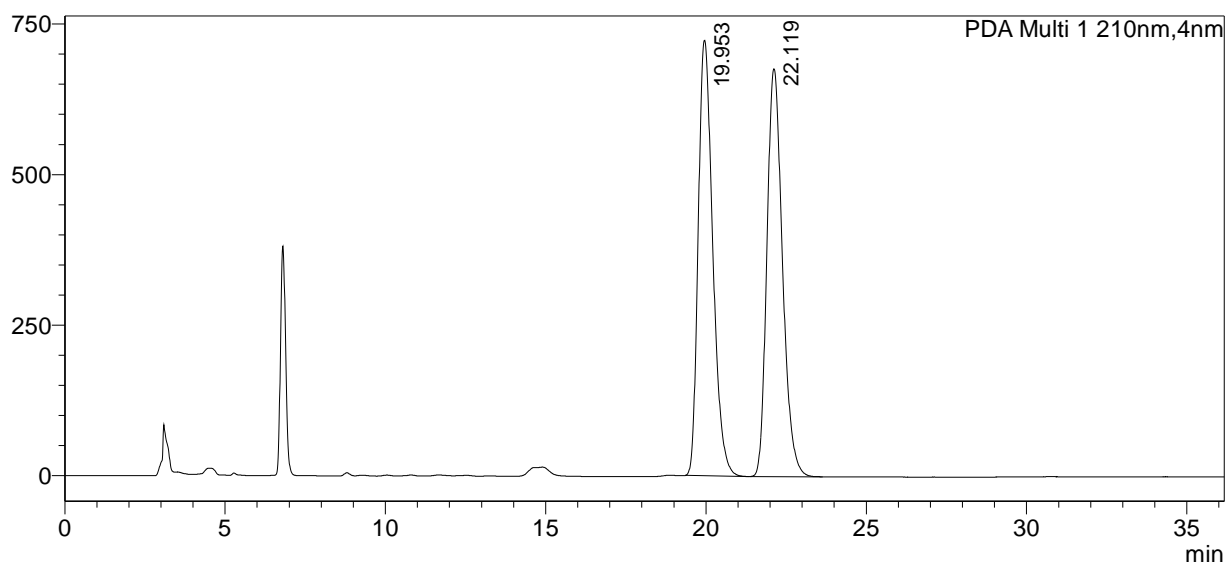

## <Peak Table>

PDA Ch1 210nm

| Peak# | Ret. Time | Area     | Height  | Conc.  | Unit | Mark | Name |
|-------|-----------|----------|---------|--------|------|------|------|
| 1     | 19.953    | 22762604 | 722863  | 49.912 |      |      |      |
| 2     | 22.119    | 22842913 | 676979  | 50.088 |      |      |      |
| Total |           | 45605517 | 1399843 |        |      |      |      |

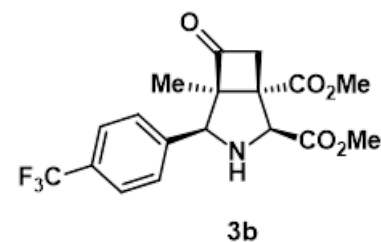

## <Sample Information>

Sample Name : LLC-1-90 ADH 5%  
 Sample ID :  
 Data Filename : LLC-1-90 ADH 5%.lcd

Method Filename : AD-H; 1 ml; 5%IPA in Hex; 60min.lcm  
 Batch Filename : 20210901.lcb  
 Vial # : 1-51  
 Injection Volume : 10 uL  
 Date Acquired : 12/1/2021 8:26:44 PM  
 Date Processed : 12/1/2021 9:26:47 PM

Sample Type : Unknown  
 Acquired by : System Administrator  
 Processed by : System Administrator

## <Chromatogram>

mAU

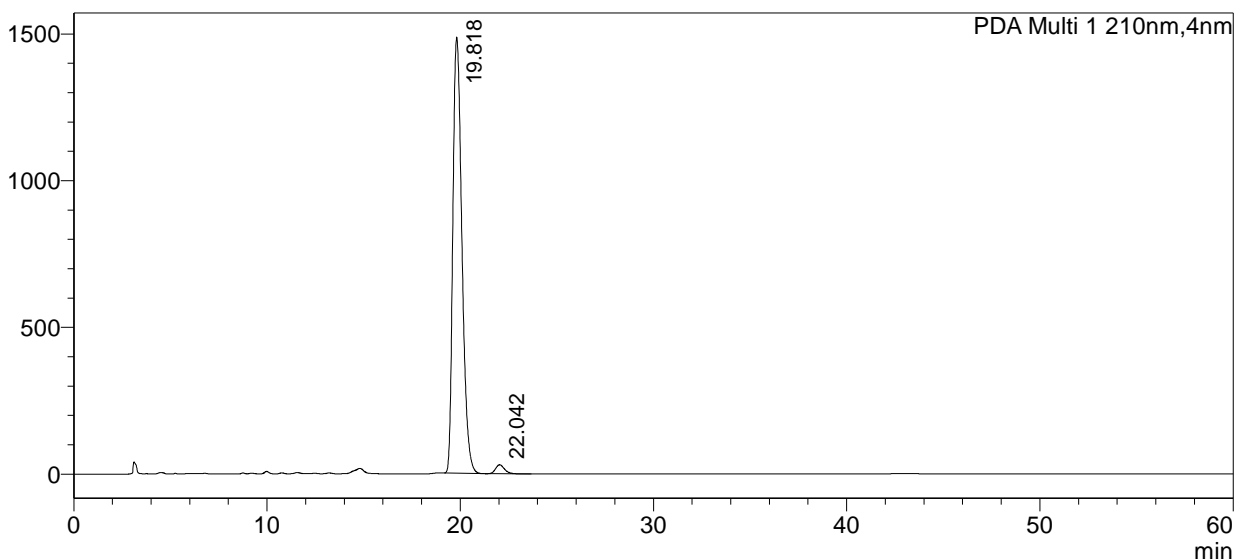

## <Peak Table>

PDA Ch1 210nm

| Peak# | Ret. Time | Area     | Height  | Conc.  | Unit | Mark | Name |
|-------|-----------|----------|---------|--------|------|------|------|
| 1     | 19.818    | 48544582 | 1485194 | 98.009 |      |      |      |
| 2     | 22.042    | 986092   | 30757   | 1.991  |      |      |      |
| Total |           | 49530674 | 1515951 |        |      |      |      |

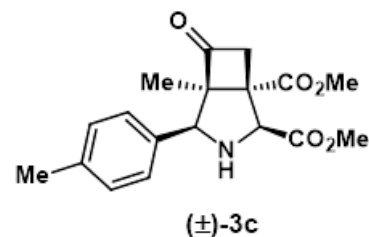

## <Sample Information>

Sample Name : LLC-2-57 ap IC-20%  
 Sample ID :  
 Data Filename : LLC-2-57 IC-20%.lcd

Method Filename : IC,1ml 20%IPA in Hex;60min.lcm  
 Batch Filename : 0825.lcb  
 Vial # : 1-31  
 Injection Volume : 10 uL  
 Date Acquired : 9/19/2022 1:26:28 PM  
 Date Processed : 9/19/2022 2:26:30 PM

Sample Type : Unknown  
 Acquired by : System Administrator  
 Processed by : System Administrator

## <Chromatogram>

mAU

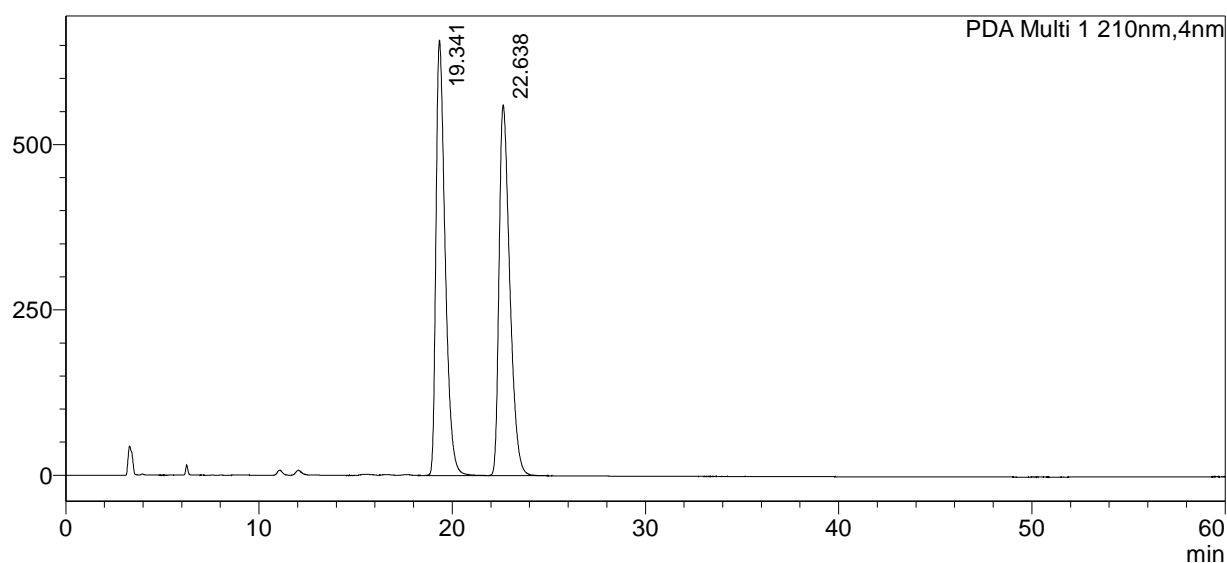

## <Peak Table>

PDA Ch1 210nm

| Peak# | Ret. Time | Area     | Height  | Conc.  | Unit | Mark | Name |
|-------|-----------|----------|---------|--------|------|------|------|
| 1     | 19.341    | 21768662 | 658149  | 50.167 |      | SV   |      |
| 2     | 22.638    | 21623437 | 560762  | 49.833 |      |      |      |
| Total |           | 43392099 | 1218910 |        |      |      |      |

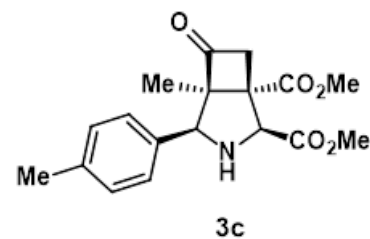

## <Sample Information>

Sample Name : LLC-2-58 ap IC-20%  
 Sample ID :  
 Data Filename : LLC-2-58 IC-20%.lcd

Method Filename : IC,1ml 20%IPA in Hex;40min.lcm  
 Batch Filename : 0825.lcb  
 Vial # : 1-32  
 Injection Volume : 10 uL  
 Date Acquired : 9/19/2022 2:27:00 PM  
 Date Processed : 9/19/2022 3:07:04 PM

Sample Type : Unknown  
 Acquired by : System Administrator  
 Processed by : System Administrator

## <Chromatogram>

mAU

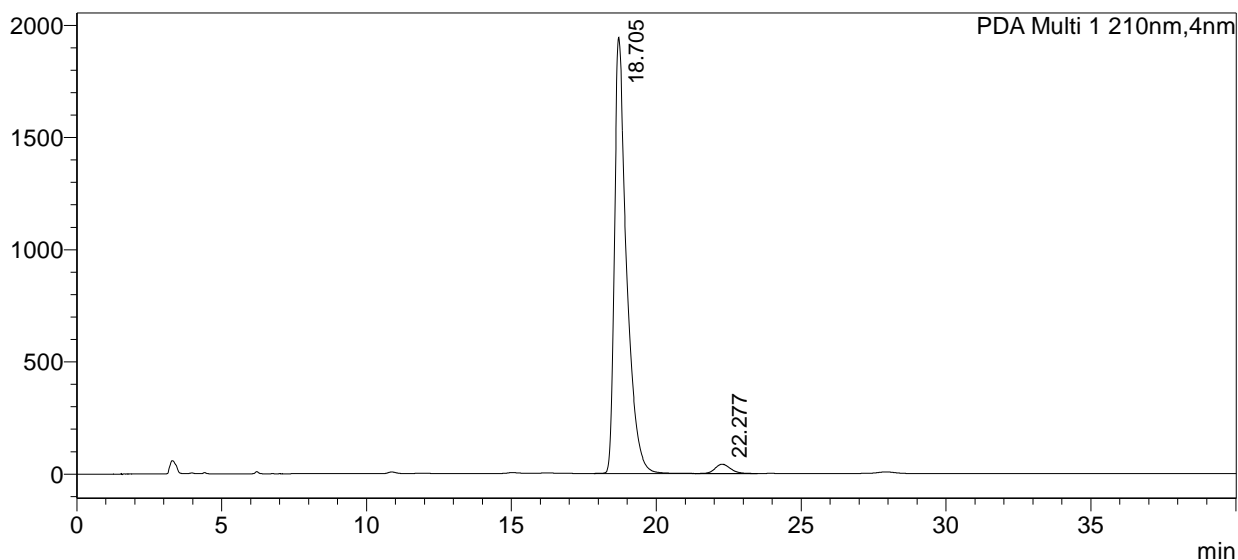

## <Peak Table>

PDA Ch1 210nm

| Peak# | Ret. Time | Area     | Height  | Conc.  | Unit | Mark | Name |
|-------|-----------|----------|---------|--------|------|------|------|
| 1     | 18.705    | 56228324 | 1943318 | 97.385 |      | S    |      |
| 2     | 22.277    | 1509783  | 41398   | 2.615  |      | T    |      |
| Total |           | 57738108 | 1984716 |        |      |      |      |

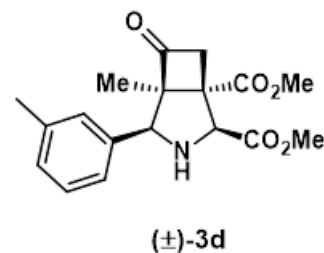

## <Sample Information>

Sample Name : LLC-2-54 IC-10%B  
 Sample ID :  
 Data Filename : LLC-2-54 IC-10%B.lcd  
  
 Method Filename : IC,1ml 10%IPA in Hex;60min.lcm  
 Batch Filename : 0825.lcb  
 Vial # : 1-61  
 Injection Volume : 10 uL  
 Date Acquired : 9/6/2022 7:44:21 PM  
 Date Processed : 9/6/2022 8:44:23 PM

Sample Type : Unknown  
 Acquired by : System Administrator  
 Processed by : System Administrator

## <Chromatogram>

mAU

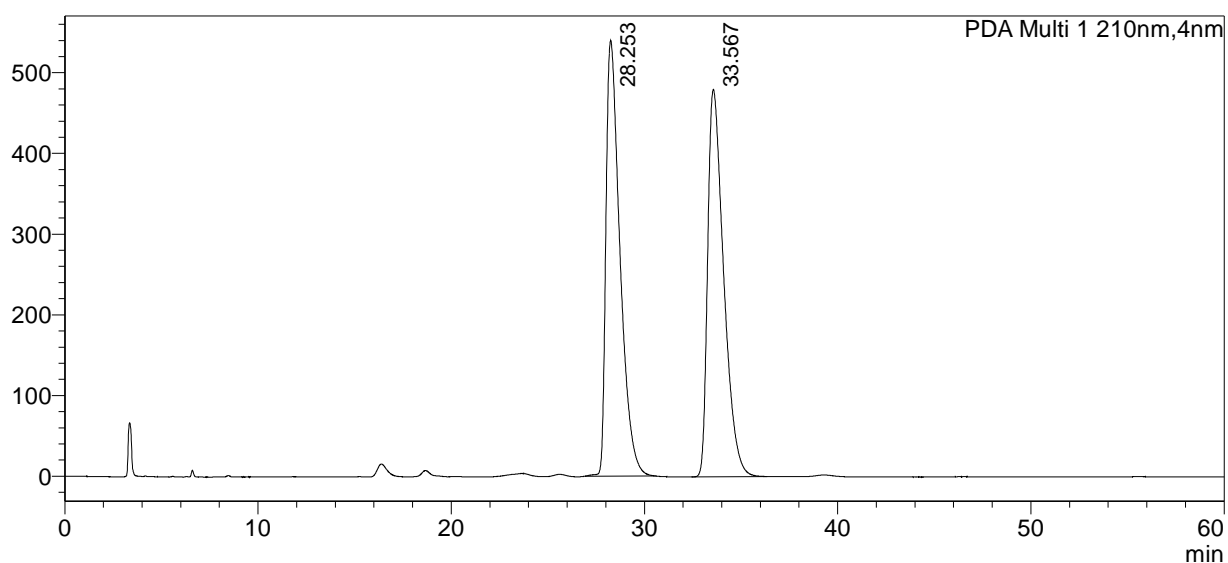

## <Peak Table>

PDA Ch1 210nm

| Peak# | Ret. Time | Area     | Height  | Conc.  | Unit | Mark | Name |
|-------|-----------|----------|---------|--------|------|------|------|
| 1     | 28.253    | 27302509 | 539929  | 49.704 |      |      |      |
| 2     | 33.567    | 27627344 | 480182  | 50.296 |      |      |      |
| Total |           | 54929853 | 1020111 |        |      |      |      |

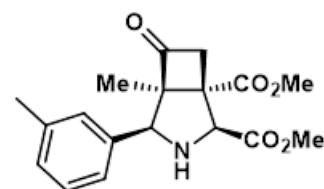

3d

## <Sample Information>

Sample Name : LLC-2-55 IC-10%B  
 Sample ID :  
 Data Filename : LLC-2-55 IC-10%B.lcd  
  
 Method Filename : IC,1ml 10%IPA in Hex;60min.lcm  
 Batch Filename : 0825.lcb  
 Vial # : 1-62  
 Injection Volume : 10 uL  
 Date Acquired : 9/6/2022 8:44:54 PM  
 Date Processed : 9/6/2022 9:44:56 PM

Sample Type : Unknown  
 Acquired by : System Administrator  
 Processed by : System Administrator

## <Chromatogram>

mAU

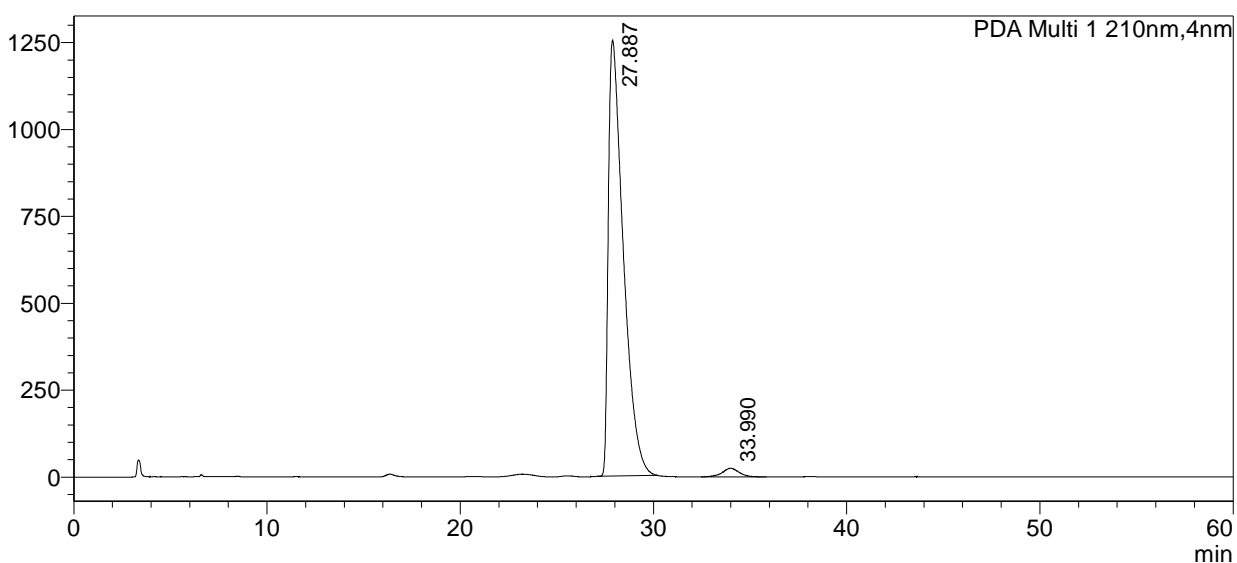

## <Peak Table>

PDA Ch1 210nm

| Peak# | Ret. Time | Area     | Height  | Conc.  | Unit | Mark | Name |
|-------|-----------|----------|---------|--------|------|------|------|
| 1     | 27.887    | 67759575 | 1253614 | 97.826 |      |      |      |
| 2     | 33.990    | 1505975  | 24656   | 2.174  |      | V    |      |
| Total |           | 69265550 | 1278270 |        |      |      |      |

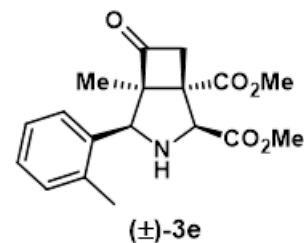

## <Sample Information>

Sample Name : LLC-2-52 IC-10%  
 Sample ID :  
 Data Filename : LLC-2-52 IC-10%.lcd

Method Filename : IC,1ml 10%IPA in Hex;60min.lcm  
 Batch Filename : 0825.lcb  
 Vial # : 1-93  
 Injection Volume : 10 uL  
 Date Acquired : 9/4/2022 2:52:17 AM  
 Date Processed : 9/4/2022 3:52:20 AM

Sample Type : Unknown  
 Acquired by : System Administrator  
 Processed by : System Administrator

## <Chromatogram>

mAU

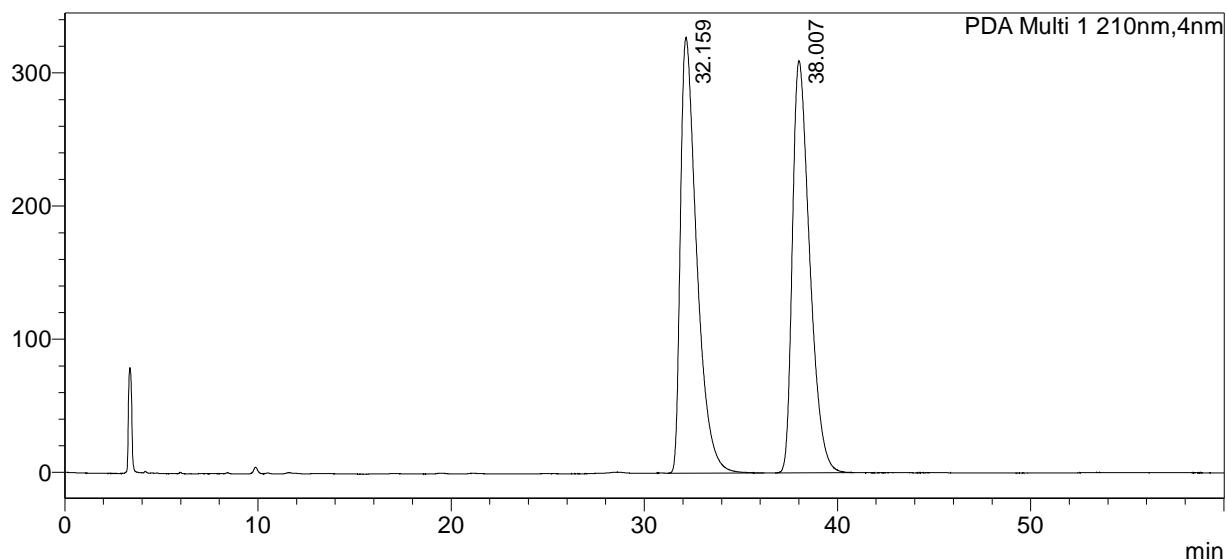

## <Peak Table>

PDA Ch1 210nm

| Peak# | Ret. Time | Area     | Height | Conc.  | Unit | Mark | Name |
|-------|-----------|----------|--------|--------|------|------|------|
| 1     | 32.159    | 19245123 | 327259 | 49.967 |      | S    |      |
| 2     | 38.007    | 19270623 | 309471 | 50.033 |      |      |      |
| Total |           | 38515745 | 636730 |        |      |      |      |



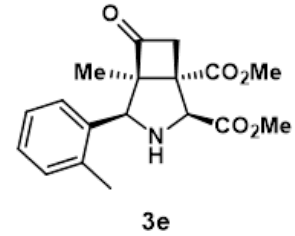

## <Sample Information>

Sample Name : LLC-2-53 IC-10%  
 Sample ID :  
 Data Filename : LLC-2-53 IC-10%.lcd

Method Filename : IC,1ml 10%IPA in Hex;60min.lcm  
 Batch Filename : 0825.lcb  
 Vial # : 1-94  
 Injection Volume : 10 uL  
 Date Acquired : 9/4/2022 3:52:49 AM  
 Date Processed : 9/4/2022 4:52:52 AM

Sample Type : Unknown  
 Acquired by : System Administrator  
 Processed by : System Administrator

## <Chromatogram>

mAU

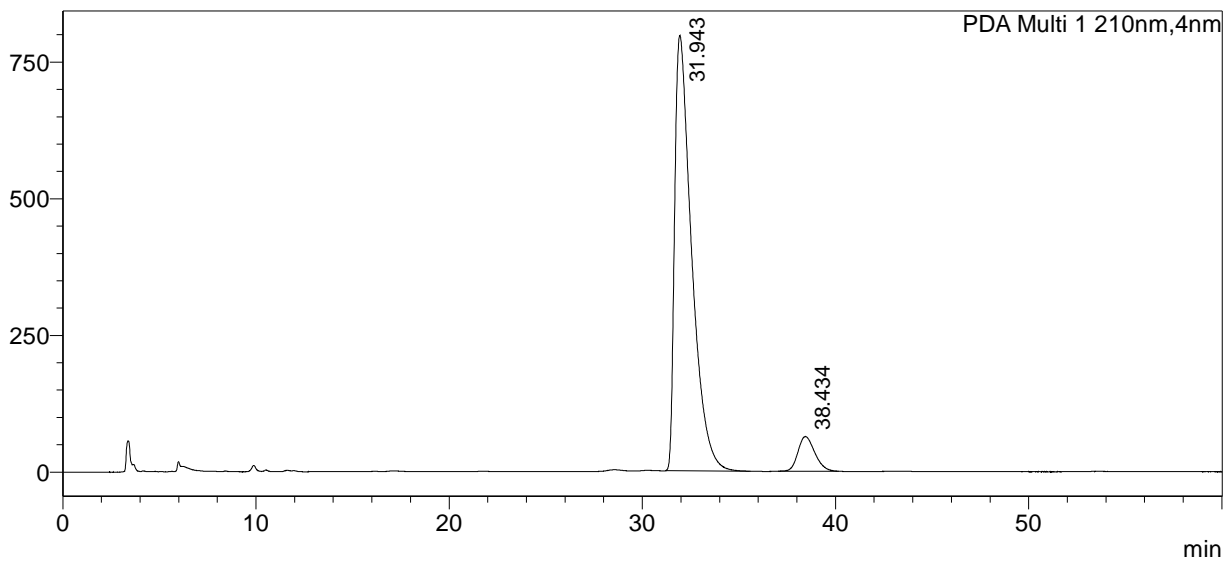

## <Peak Table>

PDA Ch1 210nm

| Peak# | Ret. Time | Area     | Height | Conc.  | Unit | Mark | Name |
|-------|-----------|----------|--------|--------|------|------|------|
| 1     | 31.943    | 48624086 | 796509 | 92.675 |      |      |      |
| 2     | 38.434    | 3843069  | 63491  | 7.325  |      |      |      |
| Total |           | 52467155 | 860000 |        |      |      |      |

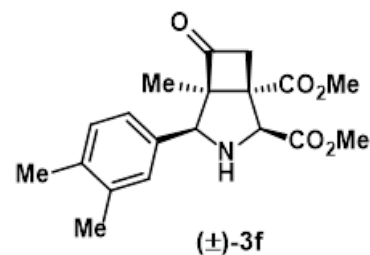

## <Sample Information>

Sample Name : LLC-1-170-ap2 ODH-5%  
 Sample ID :  
 Data Filename : LLC-1-170-ap2 ODH-5%.lcd

Method Filename : OD-H,1ml 5%IPA in Hex;60min.lcm  
 Batch Filename : 1.lcb  
 Vial # : 1-26  
 Injection Volume : 10 uL  
 Date Acquired : 5/12/2023 10:07:55 AM  
 Date Processed : 5/12/2023 10:50:36 AM

Sample Type : Unknown  
 Acquired by : System Administrator  
 Processed by : System Administrator

## <Chromatogram>

mAU

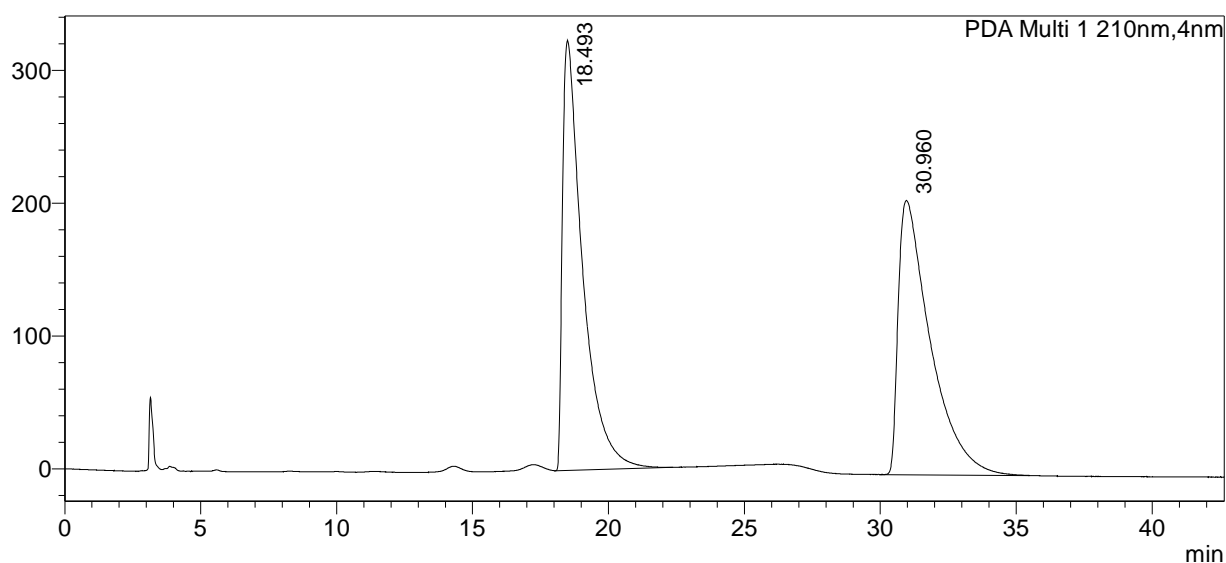

## <Peak Table>

PDA Ch1 210nm

| Peak# | Ret. Time | Area     | Height | Conc.  | Unit | Mark | Name |
|-------|-----------|----------|--------|--------|------|------|------|
| 1     | 18.493    | 16677421 | 323660 | 49.625 |      |      |      |
| 2     | 30.960    | 16929696 | 206493 | 50.375 |      |      |      |
| Total |           | 33607117 | 530152 |        |      |      |      |

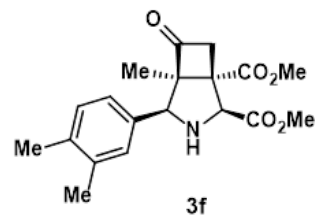

## <Sample Information>

Sample Name : LLC-1-171 ODH-5%  
 Sample ID :  
 Data Filename : LLC-1-171 ODH-5%.lcd

Method Filename : OD-H,1ml 5%IPA in Hex;60min.lcm  
 Batch Filename : 0825.lcb  
 Vial # : 1-65  
 Injection Volume : 10 uL  
 Date Acquired : 7/28/2022 1:44:06 PM  
 Date Processed : 7/28/2022 2:44:08 PM

Sample Type : Unknown  
 Acquired by : System Administrator  
 Processed by : System Administrator

## <Chromatogram>

mAU

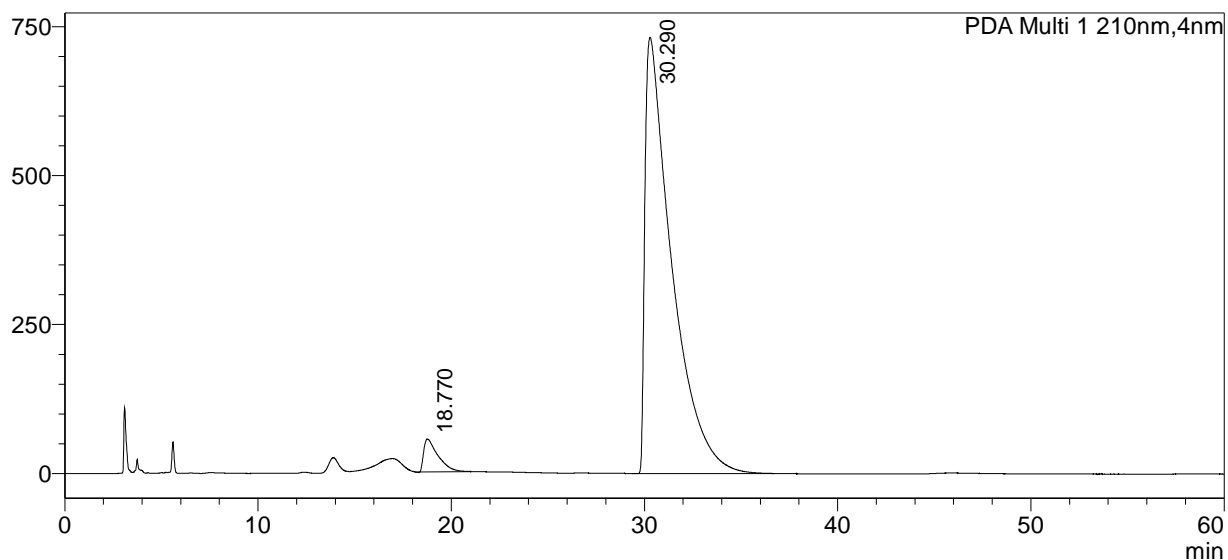

## <Peak Table>

PDA Ch1 210nm

| Peak# | Ret. Time | Area     | Height | Conc.  | Unit | Mark | Name |
|-------|-----------|----------|--------|--------|------|------|------|
| 1     | 18.770    | 2796603  | 55091  | 3.816  |      |      |      |
| 2     | 30.290    | 70493162 | 732078 | 96.184 |      |      |      |
| Total |           | 73289765 | 787169 |        |      |      |      |

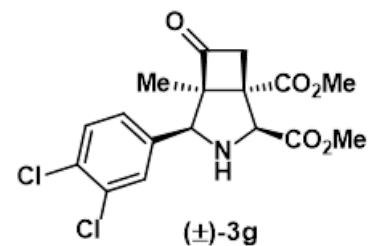

## <Sample Information>

Sample Name : LLC-1-93 IC-10%  
 Sample ID :  
 Data Filename : LLC-1-93 IC-10%.lcd

Method Filename : IC,1ml 10%IPA in Hex;60min.lcm  
 Batch Filename : 20210901.lcb  
 Vial # : 1-16  
 Injection Volume : 10 uL  
 Date Acquired : 12/14/2021 3:03:23 PM  
 Date Processed : 12/14/2021 4:03:26 PM

Sample Type : Unknown  
 Acquired by : System Administrator  
 Processed by : System Administrator

## <Chromatogram>

mAU

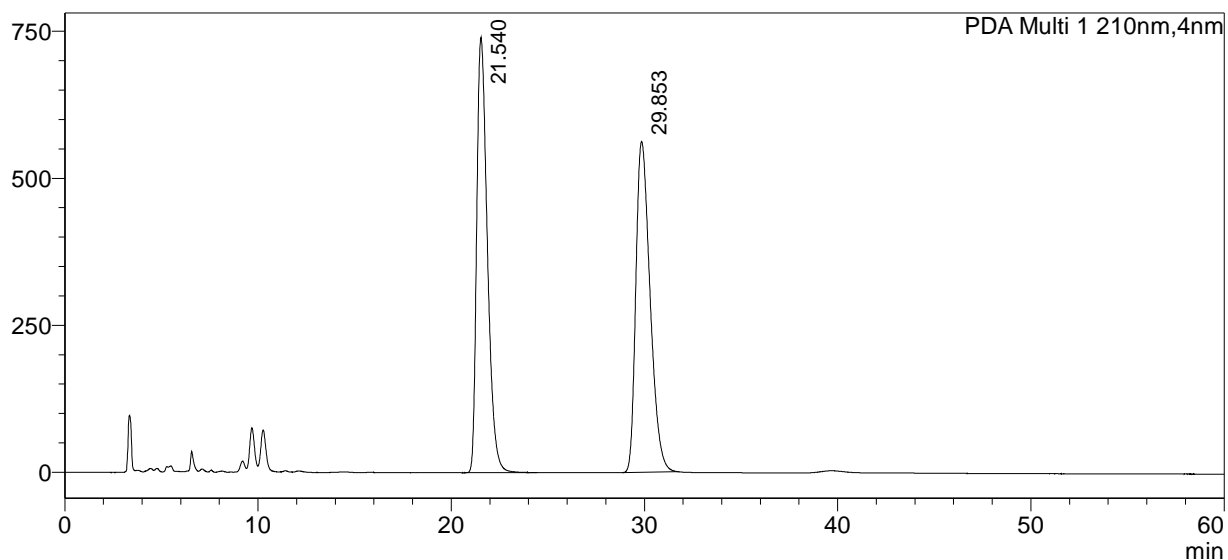

## <Peak Table>

PDA Ch1 210nm

| Peak# | Ret. Time | Area     | Height  | Conc.  | Unit | Mark | Name |
|-------|-----------|----------|---------|--------|------|------|------|
| 1     | 21.540    | 28404089 | 740508  | 49.642 |      |      |      |
| 2     | 29.853    | 28813705 | 563123  | 50.358 |      |      |      |
| Total |           | 57217794 | 1303631 |        |      |      |      |

## <Sample Information>

Sample Name : LLC-1-94 IC-10%  
 Sample ID :  
 Data Filename : LLC-1-94 IC-10%.lcd

Method Filename : IC,1ml 10%IPA in Hex;60min.lcm  
 Batch Filename : 20210901.lcb  
 Vial # : 1-32  
 Injection Volume : 10 uL  
 Date Acquired : 12/14/2021 5:24:57 PM  
 Date Processed : 12/14/2021 6:25:00 PM

Sample Type : Unknown  
 Acquired by : System Administrator  
 Processed by : System Administrator

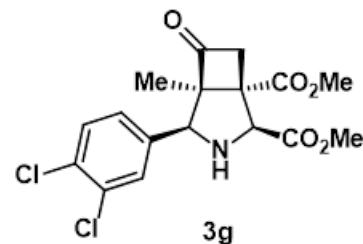

## <Chromatogram>

mAU

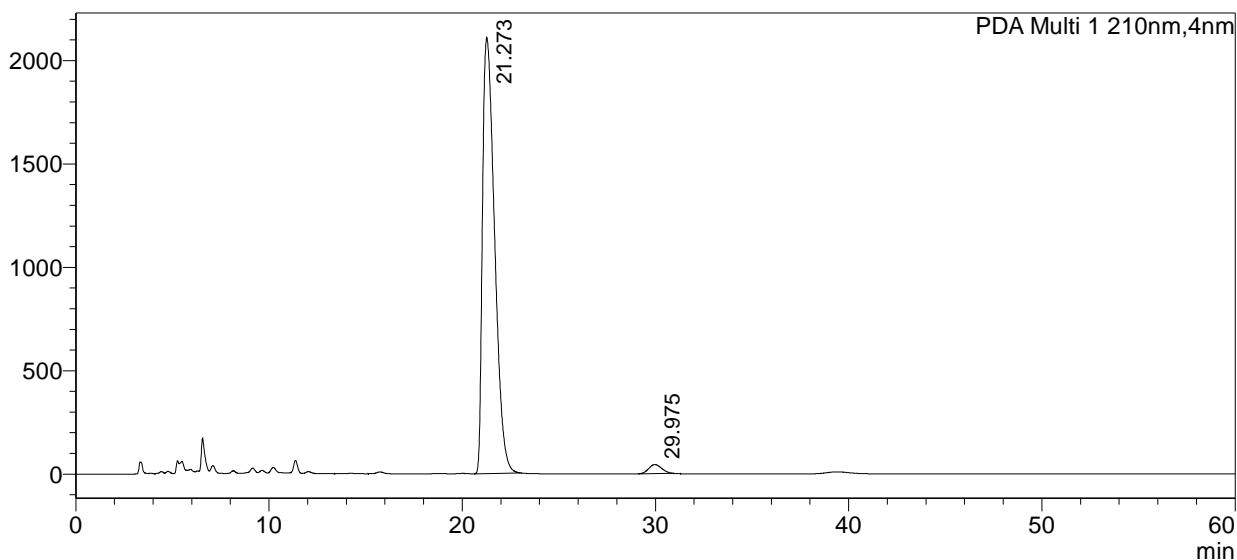

## <Peak Table>

PDA Ch1 210nm

| Peak# | Ret. Time | Area     | Height  | Conc.  | Unit | Mark | Name |
|-------|-----------|----------|---------|--------|------|------|------|
| 1     | 21.273    | 91863325 | 2109956 | 97.823 |      |      |      |
| 2     | 29.975    | 2044415  | 43677   | 2.177  |      |      |      |
| Total |           | 93907740 | 2153633 |        |      |      |      |

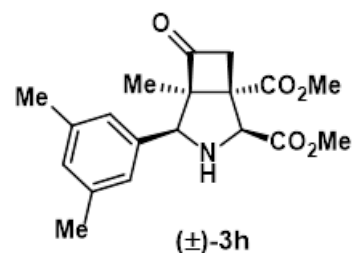

## <Sample Information>

Sample Name : LLC-1-54 IC-2.5%  
 Sample ID :  
 Data Filename : LLC-1-154 IC-2.5%.lcd

Method Filename : IC,1ml 2.5%IPA in Hex;100min.lcm  
 Batch Filename : 0825.lcb  
 Vial # : 1-4  
 Injection Volume : 10 uL  
 Date Acquired : 7/16/2022 11:51:25 AM  
 Date Processed : 7/16/2022 1:31:28 PM

Sample Type : Unknown  
 Acquired by : System Administrator  
 Processed by : System Administrator

## <Chromatogram>

mAU

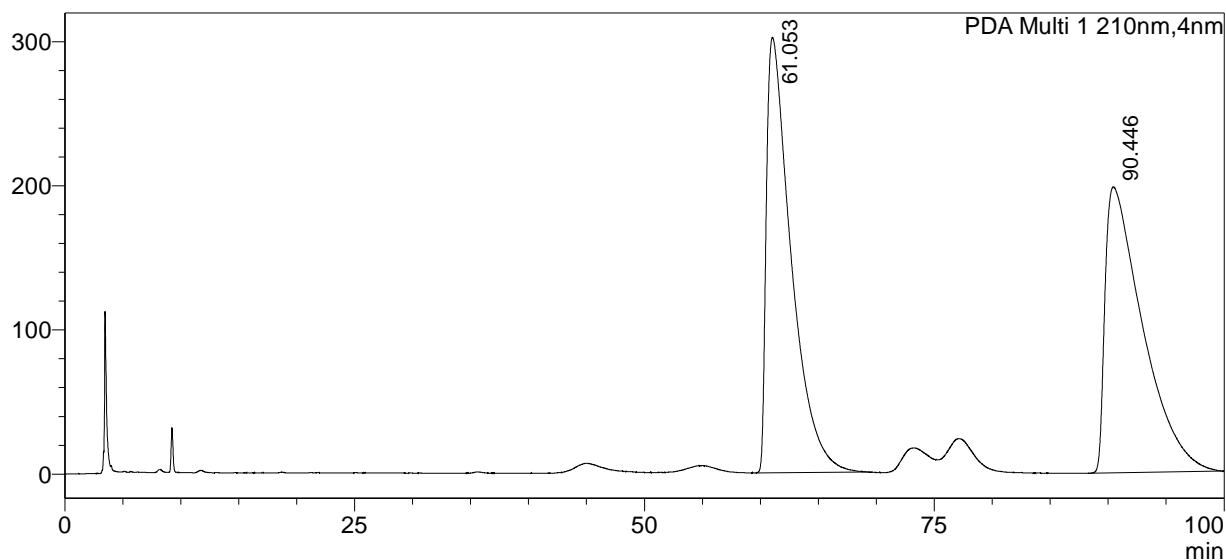

## <Peak Table>

PDA Ch1 210nm

| Peak# | Ret. Time | Area     | Height | Conc.  | Unit | Mark | Name |
|-------|-----------|----------|--------|--------|------|------|------|
| 1     | 61.053    | 44887480 | 301975 | 50.105 |      |      |      |
| 2     | 90.446    | 44699635 | 198417 | 49.895 |      |      |      |
| Total |           | 89587115 | 500392 |        |      |      |      |

## <Sample Information>

Sample Name : LLC-1-55 IC-2.5%  
 Sample ID :  
 Data Filename : LLC-1-155 IC-2.5%.lcd

Method Filename : IC,1ml 2.5%IPA in Hex;100min.lcm  
 Batch Filename : 0825.lcb  
 Vial # : 1-5  
 Injection Volume : 10 uL  
 Date Acquired : 7/16/2022 1:31:52 PM  
 Date Processed : 7/16/2022 3:11:55 PM

Sample Type : Unknown  
 Acquired by : System Administrator  
 Processed by : System Administrator

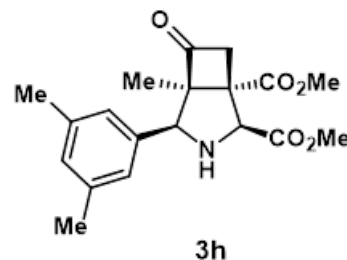

## <Chromatogram>

mAU

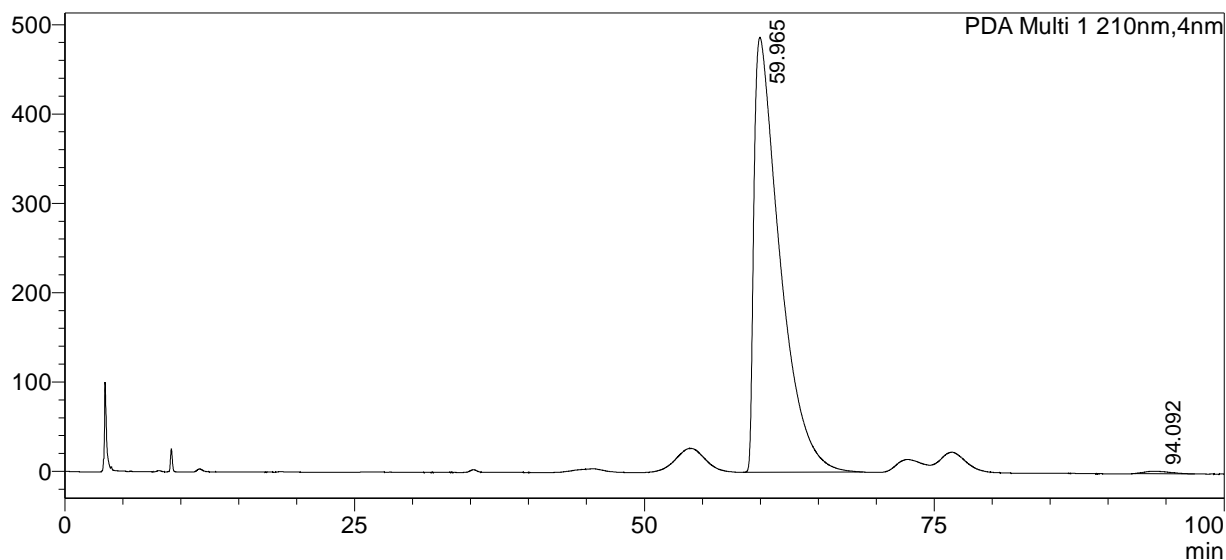

## <Peak Table>

PDA Ch1 210nm

| Peak# | Ret. Time | Area     | Height | Conc.  | Unit | Mark | Name |
|-------|-----------|----------|--------|--------|------|------|------|
| 1     | 59.965    | 75526879 | 486732 | 99.424 |      |      |      |
| 2     | 94.092    | 437241   | 2896   | 0.576  |      |      |      |
| Total |           | 75964121 | 489628 |        |      |      |      |

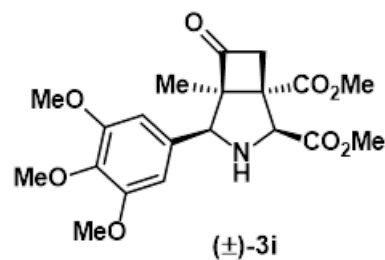

## <Sample Information>

Sample Name : LLC-1-83-2 IC-30%  
 Sample ID :  
 Data Filename : LLC-1-83-2 IC-30%.lcd

Method Filename : IC,1ml 30%IPA in Hex;100min.lcm  
 Batch Filename : 20210901.lcb  
 Vial # : 1-47  
 Injection Volume : 10 uL  
 Date Acquired : 10/31/2021 1:02:28 AM  
 Date Processed : 10/31/2021 2:42:30 AM

Sample Type : Unknown  
 Acquired by : System Administrator  
 Processed by : System Administrator

## <Chromatogram>

mAU

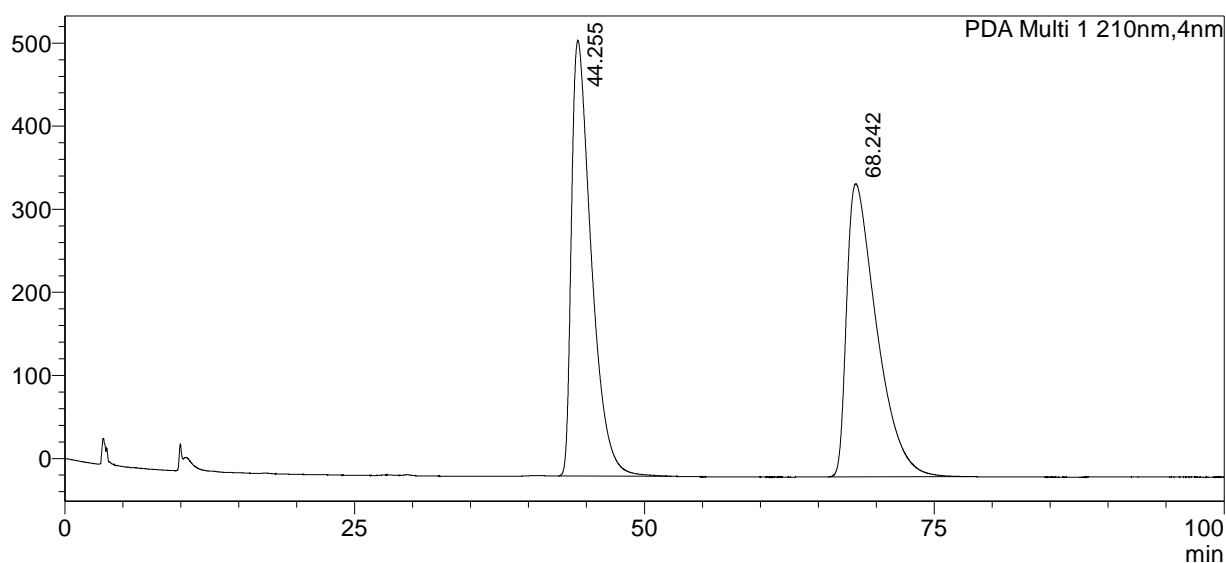

## <Peak Table>

PDA Ch1 210nm

| Peak# | Ret. Time | Area      | Height | Conc.  | Unit | Mark | Name |
|-------|-----------|-----------|--------|--------|------|------|------|
| 1     | 44.255    | 62416499  | 524224 | 49.606 |      |      |      |
| 2     | 68.242    | 63408654  | 352680 | 50.394 |      |      |      |
| Total |           | 125825153 | 876904 |        |      |      |      |



# Analysis Report

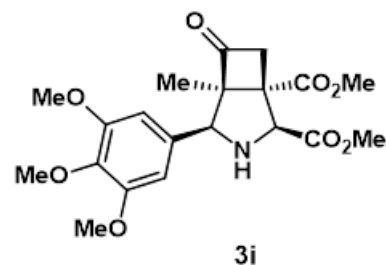

## <Sample Information>

Sample Name : LLC-1-84 IC-30% 100min  
 Sample ID :  
 Data Filename : LLC-1-84 IC-30% 100min.lcd

Method Filename : IC,1ml 30%IPA in Hex;100min.lcm  
 Batch Filename : 20210901.lcb  
 Vial # : 1-3  
 Injection Volume : 10 uL  
 Date Acquired : 10/30/2021 3:35:43 PM  
 Date Processed : 10/30/2021 5:15:45 PM

Sample Type : Unknown  
 Acquired by : System Administrator  
 Processed by : System Administrator

## <Chromatogram>

mAU

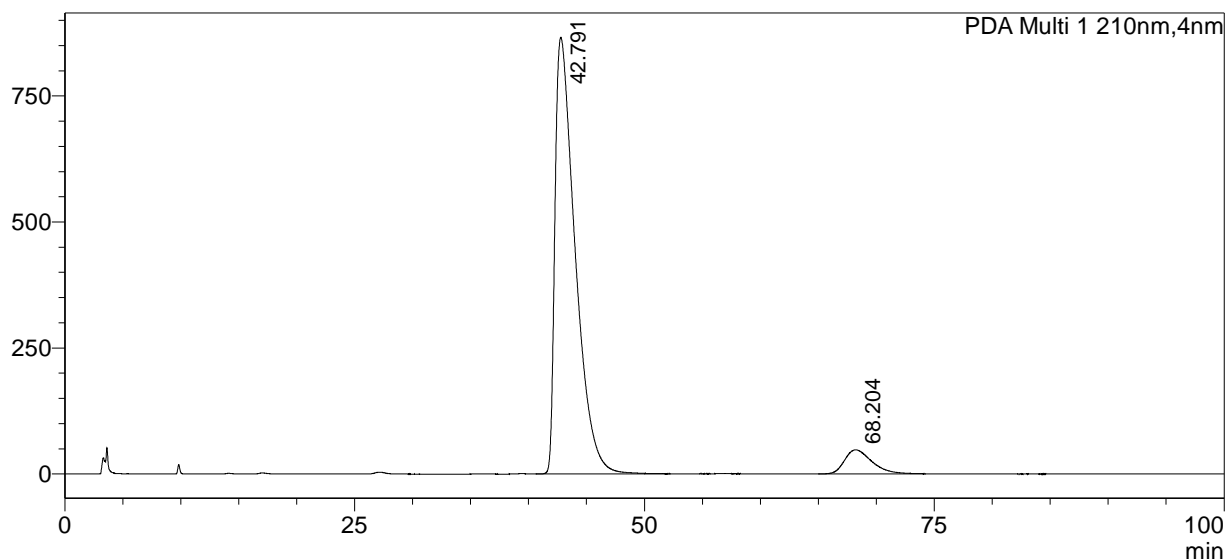

## <Peak Table>

PDA Ch1 210nm

| Peak# | Ret. Time | Area      | Height | Conc.  | Unit | Mark | Name |
|-------|-----------|-----------|--------|--------|------|------|------|
| 1     | 42.791    | 104671953 | 866210 | 93.053 |      |      |      |
| 2     | 68.204    | 7814533   | 47679  | 6.947  |      |      |      |
| Total |           | 112486486 | 913889 |        |      |      |      |

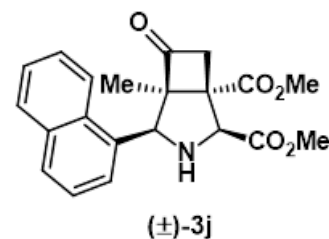

## <Sample Information>

Sample Name : LLC-1-110 ADH-10%-N  
 Sample ID :  
 Data Filename : LLC-1-110 ADH-10%-N.lcd

Method Filename : AD-H; 1 ml; 10%IPA in Hex; 40min.lcm

Batch Filename : 1.lcb

Vial # : 1-63

Injection Volume : 10 uL

Date Acquired : 3/5/2023 10:42:41 PM

Date Processed : 3/6/2023 8:45:41 AM

Sample Type : Unknown

Acquired by : System Administrator

Processed by : System Administrator

## <Chromatogram>

mAU

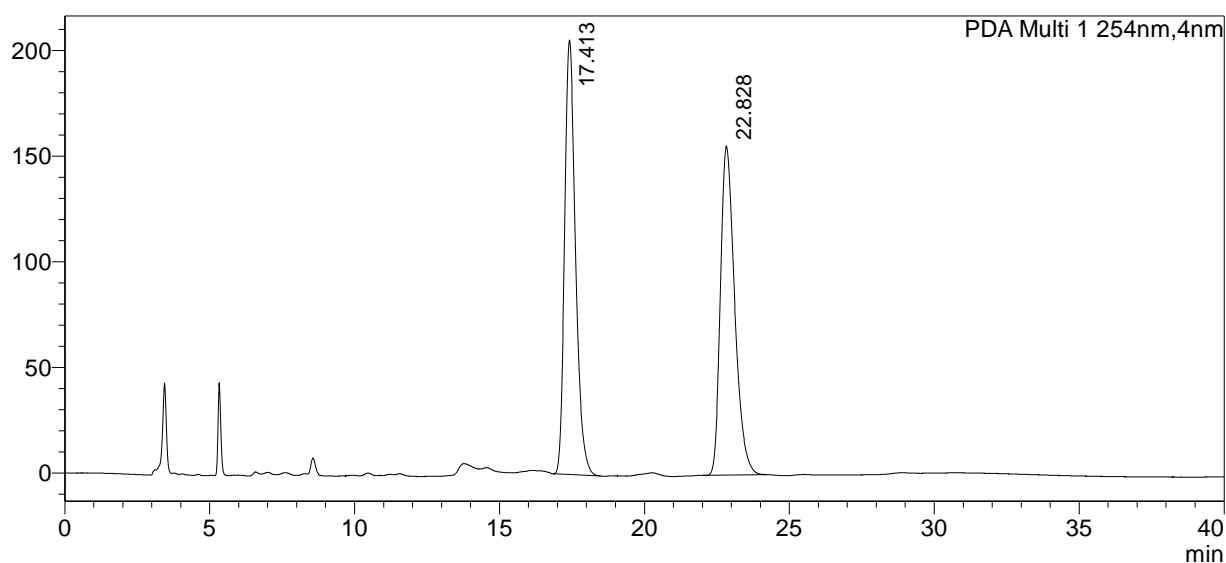

## <Peak Table>

PDA Ch1 254nm

| Peak# | Ret. Time | Area     | Height | Conc.  | Unit | Mark | Name |
|-------|-----------|----------|--------|--------|------|------|------|
| 1     | 17.413    | 5372714  | 205568 | 50.189 |      |      |      |
| 2     | 22.828    | 5332352  | 155840 | 49.811 |      |      |      |
| Total |           | 10705066 | 361409 |        |      |      |      |

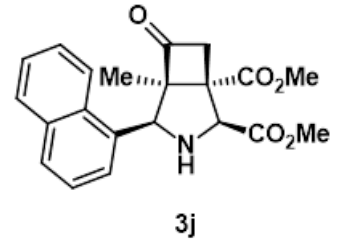

## <Sample Information>

Sample Name : LLC-3-121 ADH-10%-N  
 Sample ID :  
 Data Filename : LLC-3-121 ADH-10%-N.lcd

Method Filename : AD-H; 1 ml; 10%IPA in Hex; 40min.lcm  
 Batch Filename : 1.lcb  
 Vial # : 1-62  
 Injection Volume : 10 uL  
 Date Acquired : 3/5/2023 11:23:14 PM  
 Date Processed : 3/6/2023 12:03:17 AM

Sample Type : Unknown  
 Acquired by : System Administrator  
 Processed by : System Administrator

## <Chromatogram>

mAU

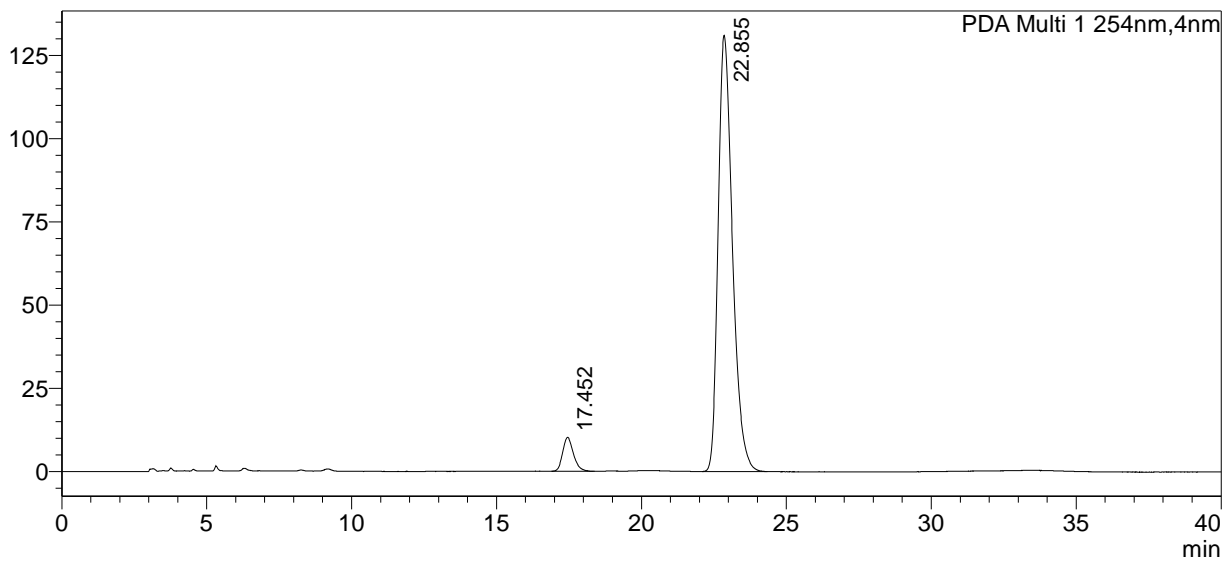

## <Peak Table>

PDA Ch1 254nm

| Peak# | Ret. Time | Area    | Height | Conc.  | Unit | Mark | Name |
|-------|-----------|---------|--------|--------|------|------|------|
| 1     | 17.452    | 263963  | 10181  | 5.530  |      |      |      |
| 2     | 22.855    | 4509062 | 131011 | 94.470 |      |      |      |
| Total |           | 4773024 | 141192 |        |      |      |      |

# Analysis Report

## <Sample Information>

Sample Name : LLC-1-100 IC-10%  
 Sample ID :  
 Data Filename : LLC-1-100 IC-10%.lcd  
 Method Filename : IC,1ml 10%IPA in Hex;60min.lcm  
 Batch Filename : 20210901.lcb  
 Vial # : 1-2  
 Injection Volume : 10 uL  
 Date Acquired : 1/17/2022 9:49:38 AM  
 Date Processed : 1/17/2022 10:49:41 AM

Sample Type : Unknown  
 Acquired by : System Administrator  
 Processed by : System Administrator

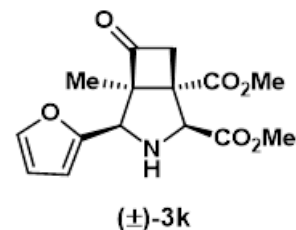

## <Chromatogram>

mAU

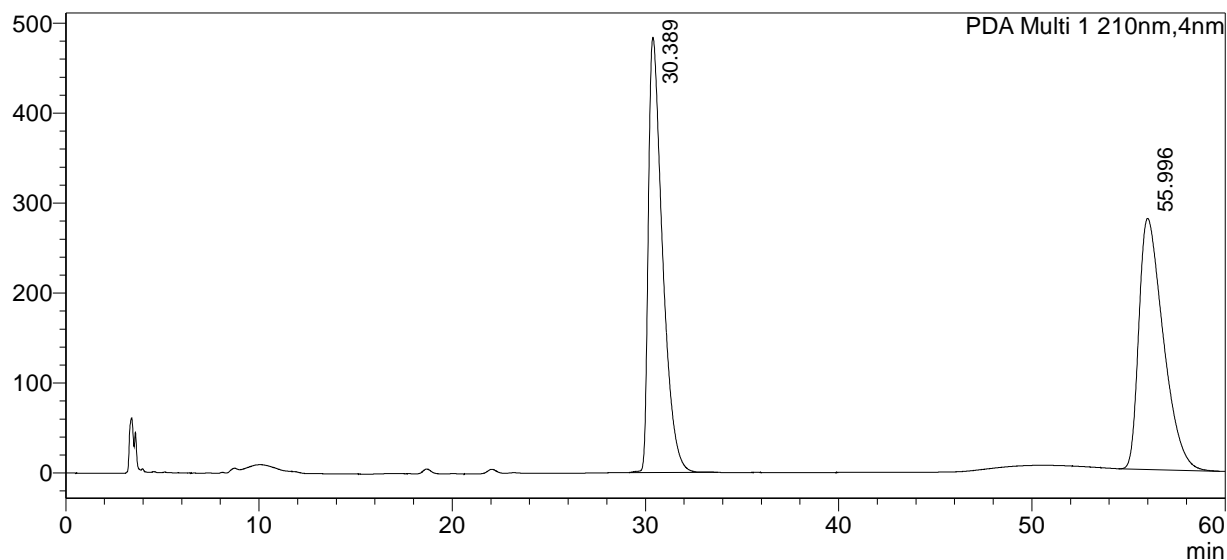

## <Peak Table>

PDA Ch1 210nm

| Peak# | Ret. Time | Area     | Height | Conc.  | Unit | Mark | Name |
|-------|-----------|----------|--------|--------|------|------|------|
| 1     | 30.389    | 24664741 | 483605 | 50.144 |      |      |      |
| 2     | 55.996    | 24522894 | 279137 | 49.856 |      |      |      |
| Total |           | 49187635 | 762742 |        |      |      |      |

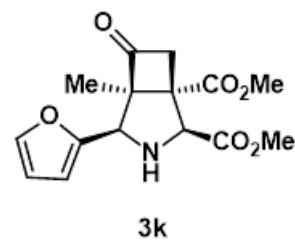

## <Sample Information>

Sample Name : LLC-1-99 IC-10%  
 Sample ID :  
 Data Filename : LLC-1-99 IC-10%.lcd

Method Filename : IC,1ml 10%IPA in Hex;60min.lcm  
 Batch Filename : 20210901.lcb  
 Vial # : 1-1  
 Injection Volume : 10 uL  
 Date Acquired : 1/17/2022 8:49:04 AM  
 Date Processed : 1/17/2022 1:09:39 PM

Sample Type : Unknown  
 Acquired by : System Administrator  
 Processed by : System Administrator

## <Chromatogram>

mAU

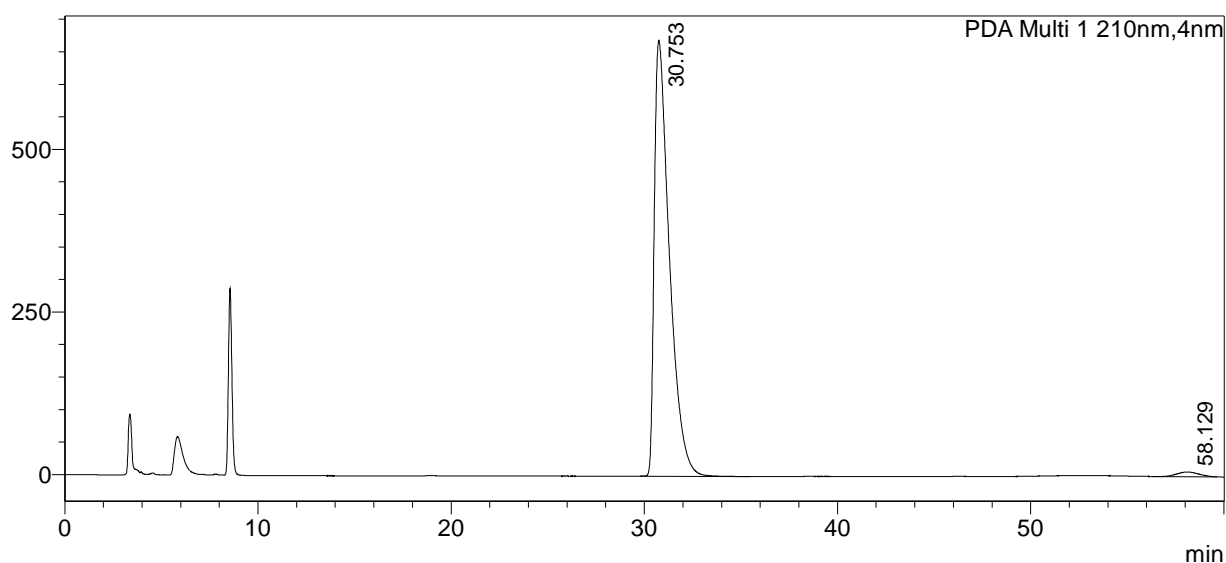

## <Peak Table>

PDA Ch1 210nm

| Peak# | Ret. Time | Area     | Height | Conc.  | Unit | Mark | Name |
|-------|-----------|----------|--------|--------|------|------|------|
| 1     | 30.753    | 36503657 | 670039 | 98.474 |      |      |      |
| 2     | 58.129    | 565649   | 7142   | 1.526  |      |      |      |
| Total |           | 37069305 | 677182 |        |      |      |      |

## <Sample Information>

Sample Name : LLC-1-102 IC-10%  
 Sample ID :  
 Data Filename : LLC-1-102 IC-10%.lcd

Method Filename : IC,1ml 10%IPA in Hex;60min.lcm  
 Batch Filename : 20210901.lcb  
 Vial # : 1-61  
 Injection Volume : 10 uL  
 Date Acquired : 1/19/2022 10:13:14 PM  
 Date Processed : 1/19/2022 11:13:16 PM

Sample Type : Unknown  
 Acquired by : System Administrator  
 Processed by : System Administrator

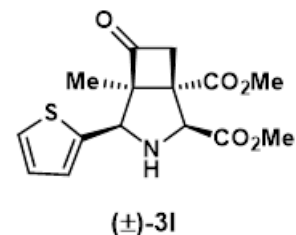

## <Chromatogram>

mAU

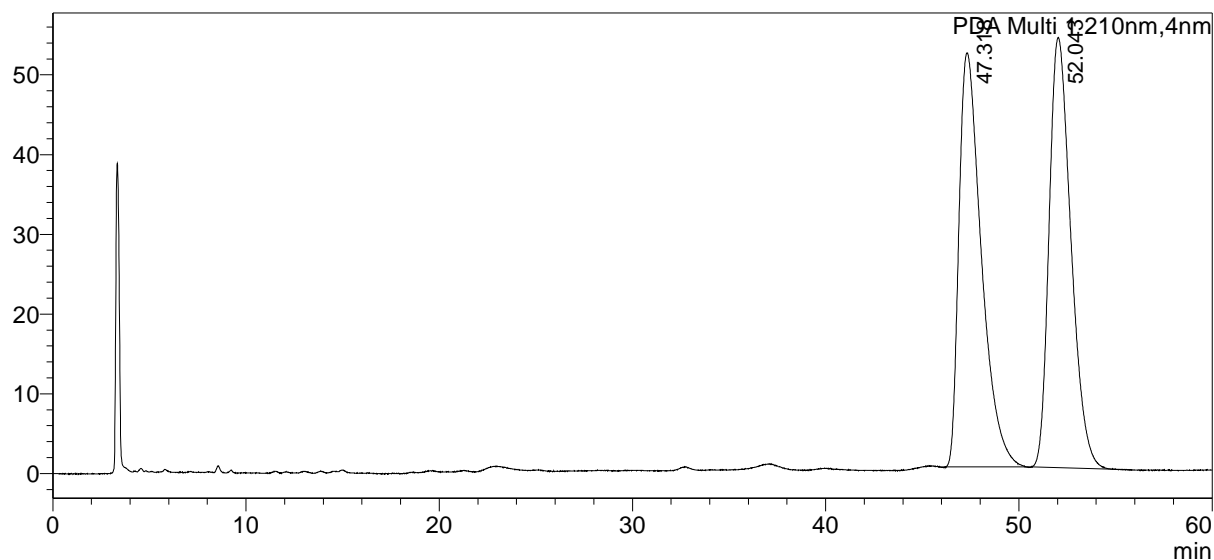

## <Peak Table>

PDA Ch1 210nm

| Peak# | Ret. Time | Area    | Height | Conc.  | Unit | Mark | Name |
|-------|-----------|---------|--------|--------|------|------|------|
| 1     | 47.318    | 4186296 | 51905  | 49.719 |      |      |      |
| 2     | 52.043    | 4233688 | 53967  | 50.281 |      |      |      |
| Total |           | 8419984 | 105871 |        |      |      |      |

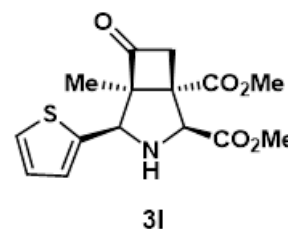

## <Sample Information>

Sample Name : LLC-3-120--2 IC-10%  
 Sample ID :  
 Data Filename : LLC-3-120--2 IC-10%.lcd

Method Filename : IC,1ml 10%IPA in Hex;60min.lcm  
 Batch Filename : 1.lcb  
 Vial # : 1-65  
 Injection Volume : 10 uL  
 Date Acquired : 2/23/2023 4:36:43 PM  
 Date Processed : 2/23/2023 5:36:46 PM

Sample Type : Unknown  
 Acquired by : System Administrator  
 Processed by : System Administrator

## <Chromatogram>

mAU

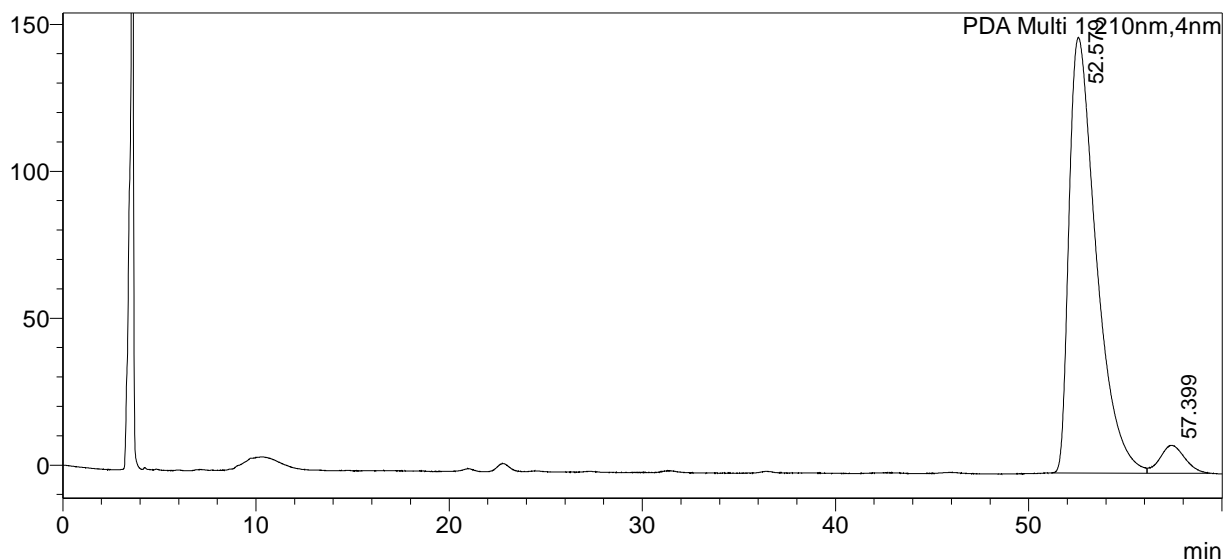

## <Peak Table>

PDA Ch1 210nm

| Peak# | Ret. Time | Area     | Height | Conc.  | Unit | Mark | Name |
|-------|-----------|----------|--------|--------|------|------|------|
| 1     | 52.579    | 14488884 | 148268 | 94.459 |      |      |      |
| 2     | 57.399    | 849882   | 9458   | 5.541  |      | V    |      |
| Total |           | 15338766 | 157726 |        |      |      |      |

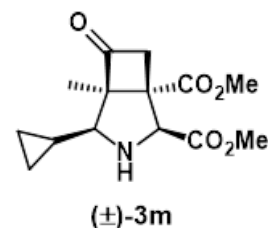

## <Sample Information>

Sample Name : LLC-2-38 IC-10%2  
 Sample ID :  
 Data Filename : LLC-2-38 IC-10%2.lcd

Method Filename : IC,1ml 10%IPA in Hex;60min.lcm  
 Batch Filename : 0825.lcb  
 Vial # : 1-62  
 Injection Volume : 10 uL  
 Date Acquired : 8/27/2022 10:50:44 PM  
 Date Processed : 8/27/2022 11:50:47 PM

Sample Type : Unknown  
 Acquired by : System Administrator  
 Processed by : System Administrator

## <Chromatogram>

mAU

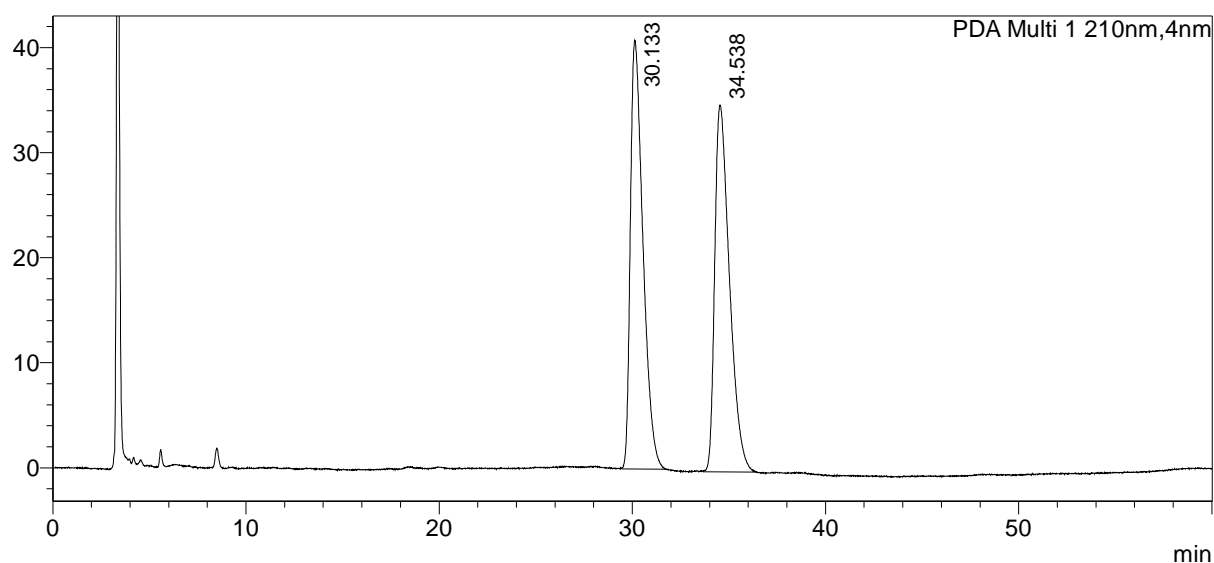

## <Peak Table>

PDA Ch1 210nm

| Peak# | Ret. Time | Area    | Height | Conc.  | Unit | Mark | Name |
|-------|-----------|---------|--------|--------|------|------|------|
| 1     | 30.133    | 1850288 | 40800  | 49.977 |      | V    |      |
| 2     | 34.538    | 1851982 | 34933  | 50.023 |      | V    |      |
| Total |           | 3702270 | 75734  |        |      |      |      |



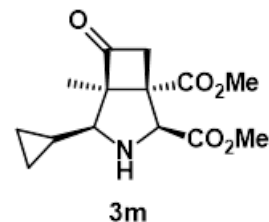

## <Sample Information>

Sample Name : LLC-2-39 IC-10%2  
 Sample ID :  
 Data Filename : LLC-2-39 IC-10%2.lcd

Method Filename : IC,1ml 10%IPA in Hex;60min.lcm  
 Batch Filename : 0825.lcb  
 Vial # : 1-63  
 Injection Volume : 10 uL  
 Date Acquired : 8/27/2022 11:51:17 PM  
 Date Processed : 8/28/2022 12:51:21 AM

Sample Type : Unknown  
 Acquired by : System Administrator  
 Processed by : System Administrator

## <Chromatogram>

mAU

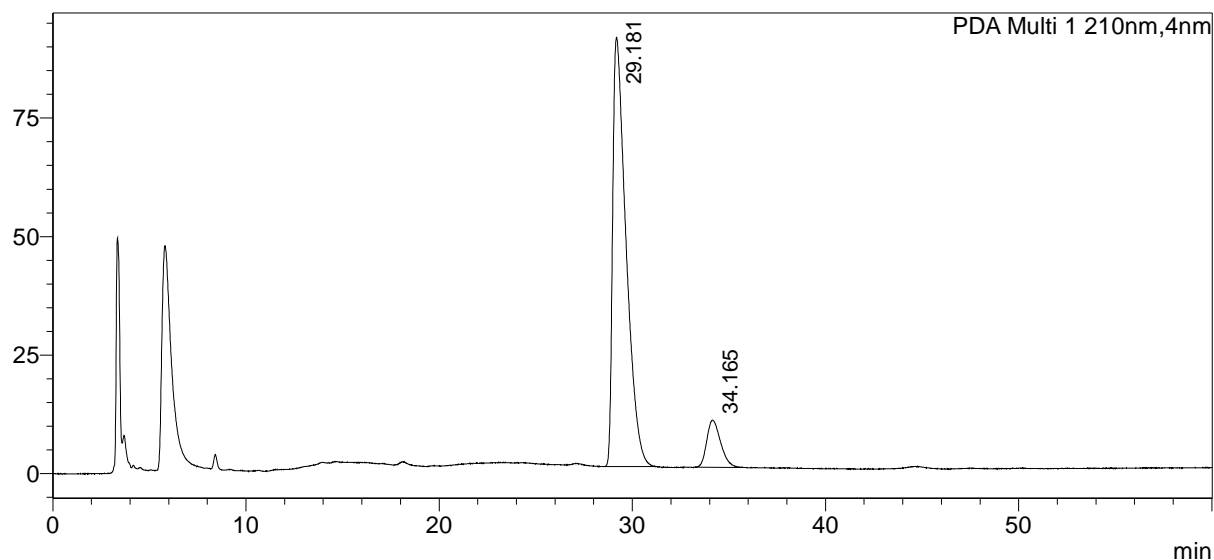

## <Peak Table>

PDA Ch1 210nm

| Peak# | Ret. Time | Area    | Height | Conc.  | Unit | Mark | Name |
|-------|-----------|---------|--------|--------|------|------|------|
| 1     | 29.181    | 4358917 | 90510  | 89.779 |      |      |      |
| 2     | 34.165    | 496243  | 9969   | 10.221 |      | S    |      |
| Total |           | 4855161 | 100479 |        |      |      |      |

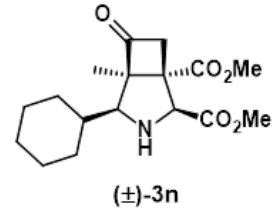

## <Sample Information>

Sample Name : LLC-1-107 IC-10%  
 Sample ID :  
 Data Filename : LLC-1-107 IC-10%.lcd

Method Filename : IC,1ml 10%IPA in Hex;60min.lcm  
 Batch Filename : 20210901.lcb  
 Vial # : 1-46  
 Injection Volume : 10 uL  
 Date Acquired : 1/20/2022 9:24:16 PM  
 Date Processed : 1/20/2022 10:24:18 PM

Sample Type : Unknown  
 Acquired by : System Administrator  
 Processed by : System Administrator

## <Chromatogram>

mAU

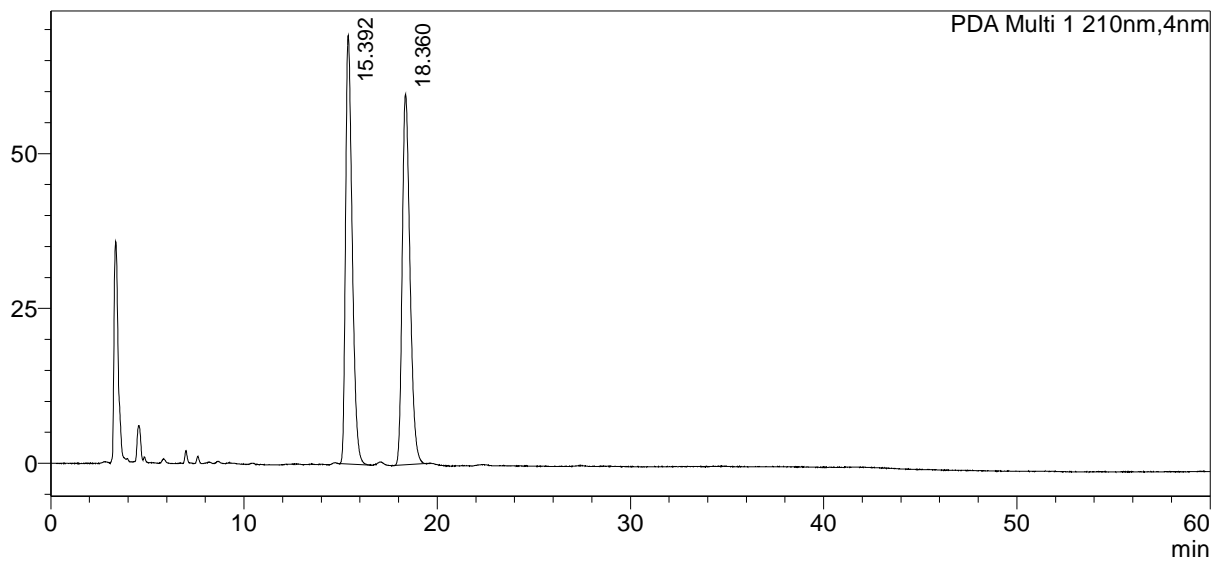

## <Peak Table>

PDA Ch1 210nm

| Peak# | Ret. Time | Area    | Height | Conc.  | Unit | Mark | Name |
|-------|-----------|---------|--------|--------|------|------|------|
| 1     | 15.392    | 1655463 | 69196  | 49.715 |      |      |      |
| 2     | 18.360    | 1674413 | 59825  | 50.285 |      |      |      |
| Total |           | 3329877 | 129021 |        |      |      |      |

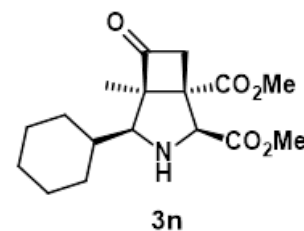

## <Sample Information>

Sample Name : LLC-1-108 IC-10%  
 Sample ID :  
 Data Filename : LLC-1-108 IC-10%.lcd

Method Filename : IC,1ml 10%IPA in Hex;60min.lcm  
 Batch Filename : 20210901.lcb  
 Vial # : 1-47  
 Injection Volume : 10 uL  
 Date Acquired : 1/20/2022 10:24:48 PM  
 Date Processed : 1/20/2022 11:24:51 PM

Sample Type : Unknown  
 Acquired by : System Administrator  
 Processed by : System Administrator

## <Chromatogram>

mAU

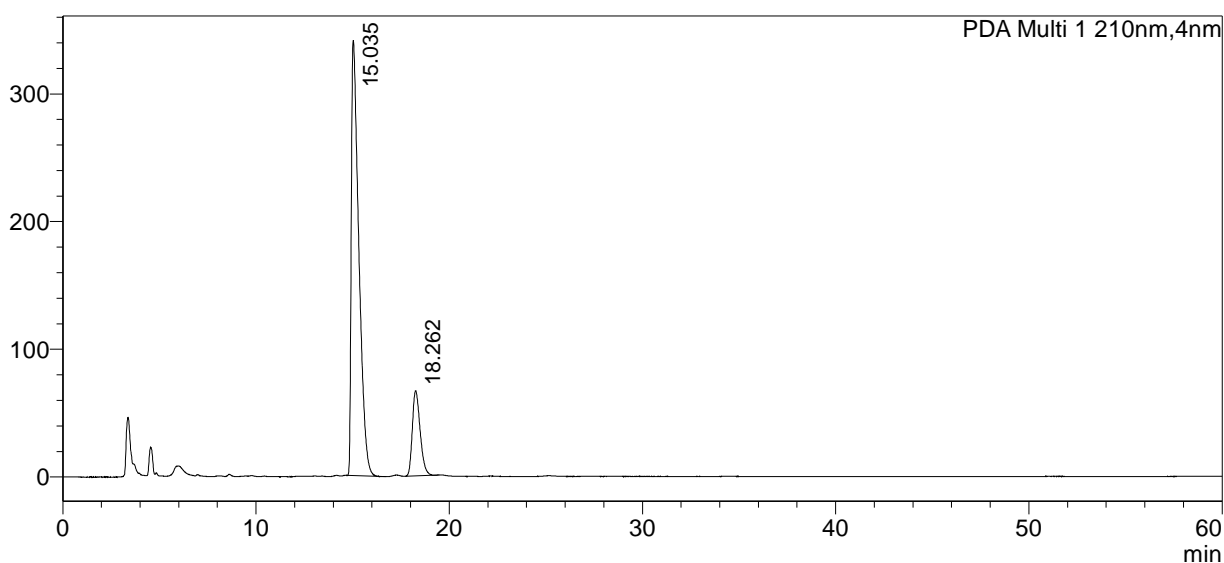

## <Peak Table>

PDA Ch1 210nm

| Peak# | Ret. Time | Area     | Height | Conc.  | Unit | Mark | Name |
|-------|-----------|----------|--------|--------|------|------|------|
| 1     | 15.035    | 9249613  | 340856 | 83.173 |      |      |      |
| 2     | 18.262    | 1871282  | 66708  | 16.827 |      |      |      |
| Total |           | 11120895 | 407564 |        |      |      |      |

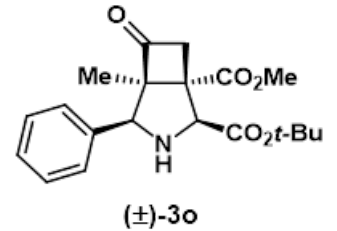

## <Sample Information>

Sample Name : LLC-2-4 IC-5%  
 Sample ID :  
 Data Filename : LLC-2-4 IC-5%.lcd

Method Filename : IC,1ml 5%IPA in Hex;60min.lcm  
 Batch Filename : 0825.lcb  
 Vial # : 1-46  
 Injection Volume : 10 uL  
 Date Acquired : 8/4/2022 9:55:16 AM  
 Date Processed : 8/4/2022 10:55:18 AM

Sample Type : Unknown  
 Acquired by : System Administrator  
 Processed by : System Administrator

## <Chromatogram>

mAU

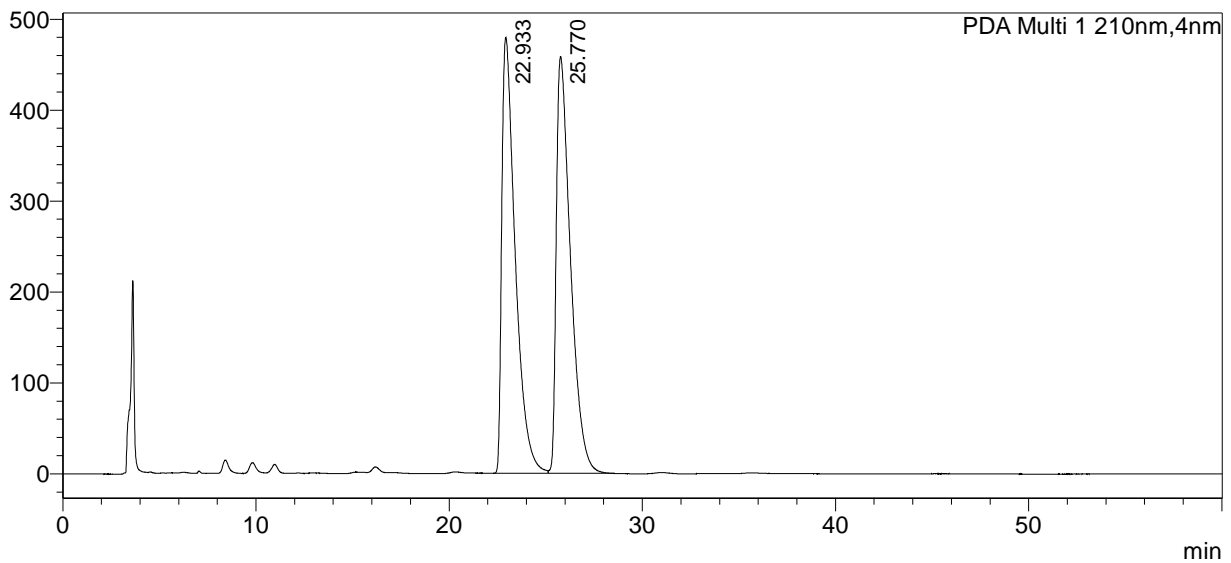

## <Peak Table>

PDA Ch1 210nm

| Peak# | Ret. Time | Area     | Height | Conc.  | Unit | Mark | Name |
|-------|-----------|----------|--------|--------|------|------|------|
| 1     | 22.933    | 23268923 | 479529 | 49.770 |      |      |      |
| 2     | 25.770    | 23483857 | 458690 | 50.230 |      | V    |      |
| Total |           | 46752780 | 938219 |        |      |      |      |

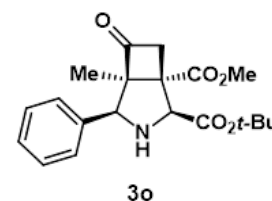

## <Sample Information>

Sample Name : LLC-2-5 IC-5%  
 Sample ID :  
 Data Filename : LLC-2-5 IC-5%.lcd

Method Filename : IC,1ml 5%IPA in Hex;60min.lcm  
 Batch Filename : 0825.lcb  
 Vial # : 1-47  
 Injection Volume : 10 uL  
 Date Acquired : 8/4/2022 10:55:49 AM  
 Date Processed : 8/4/2022 11:55:52 AM

Sample Type : Unknown  
 Acquired by : System Administrator  
 Processed by : System Administrator

## <Chromatogram>

mAU

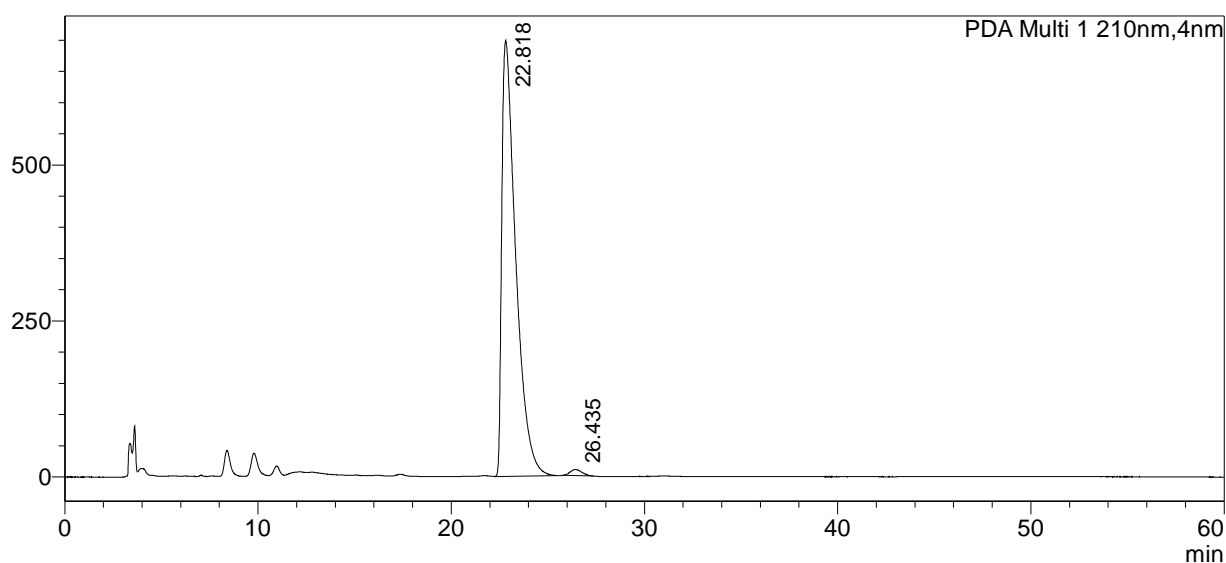

## <Peak Table>

PDA Ch1 210nm

| Peak# | Ret. Time | Area     | Height | Conc.  | Unit | Mark | Name |
|-------|-----------|----------|--------|--------|------|------|------|
| 1     | 22.818    | 35104539 | 698324 | 98.811 |      |      |      |
| 2     | 26.435    | 422274   | 9764   | 1.189  |      |      |      |
| Total |           | 35526813 | 708088 |        |      |      |      |

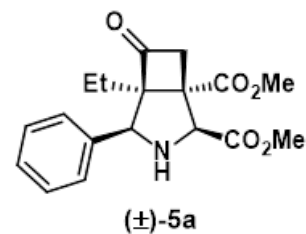

## <Sample Information>

Sample Name : LLC-1-81 IA-10%  
 Sample ID :  
 Data Filename : LLC-1-81 IA-10%.lcd

Method Filename : IA,1ml 10%IPA in Hex;60min.lcm  
 Batch Filename : 20210901.lcb  
 Vial # : 1-1  
 Injection Volume : 10 uL  
 Date Acquired : 11/6/2021 2:22:12 AM  
 Date Processed : 11/6/2021 3:22:15 AM

Sample Type : Unknown  
 Acquired by : System Administrator  
 Processed by : System Administrator

## <Chromatogram>

mAU

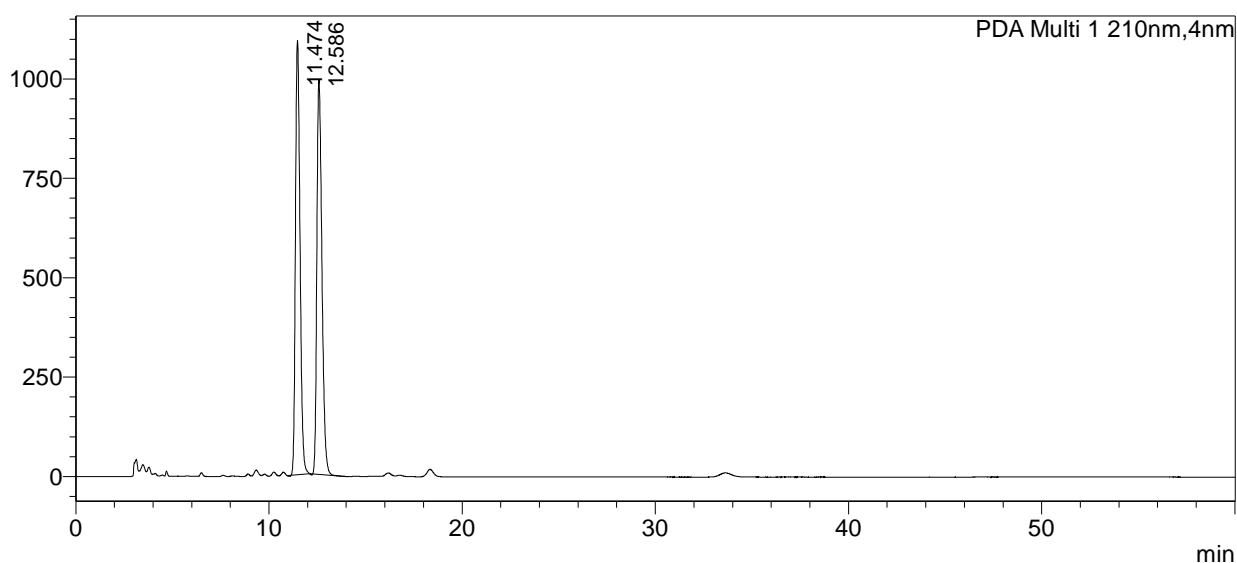

## <Peak Table>

PDA Ch1 210nm

| Peak# | Ret. Time | Area     | Height  | Conc.  | Unit | Mark | Name |
|-------|-----------|----------|---------|--------|------|------|------|
| 1     | 11.474    | 17922943 | 1092624 | 49.770 |      |      |      |
| 2     | 12.586    | 18088520 | 994517  | 50.230 |      |      |      |
| Total |           | 36011463 | 2087142 |        |      |      |      |

## <Sample Information>

Sample Name : LLC-1-80 IA-10%  
 Sample ID :  
 Data Filename : LLC-1-80 IA-10%.lcd

Method Filename : IA,1ml 10%IPA in Hex;40min.lcm  
 Batch Filename : 20210901.lcb  
 Vial # : 1-3  
 Injection Volume : 10 uL  
 Date Acquired : 11/6/2021 8:20:35 PM  
 Date Processed : 11/15/2021 5:31:03 PM

Sample Type : Unknown  
 Acquired by : System Administrator  
 Processed by : System Administrator

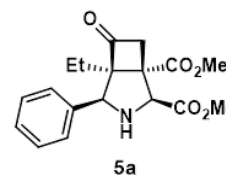

## <Chromatogram>

mAU

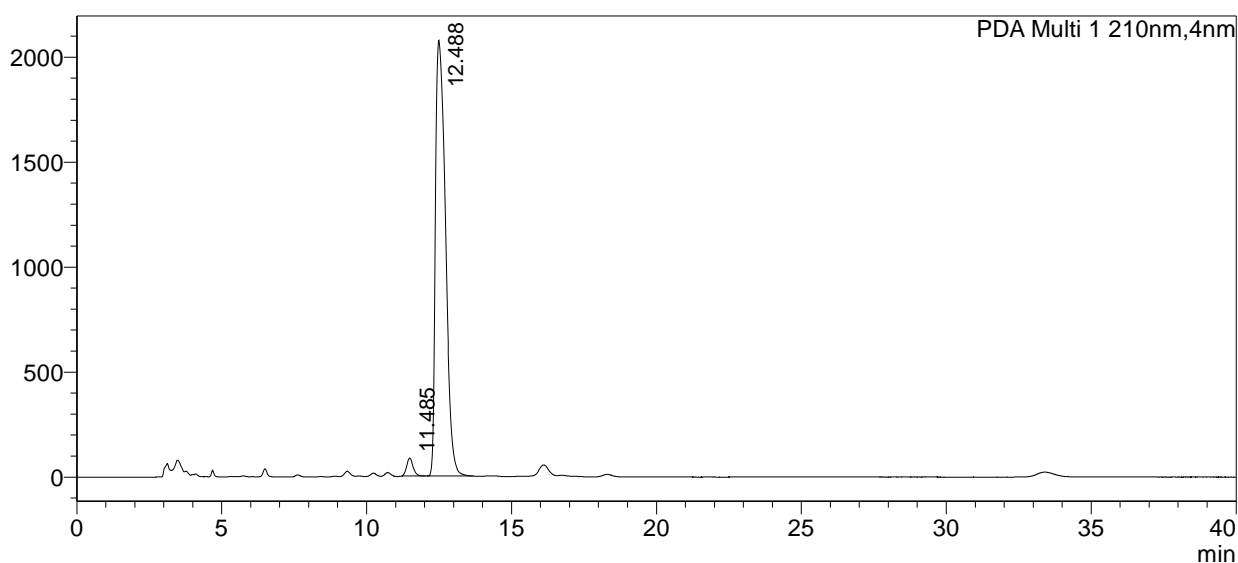

## <Peak Table>

PDA Ch1 210nm

| Peak# | Ret. Time | Area     | Height  | Conc.  | Unit | Mark | Name |
|-------|-----------|----------|---------|--------|------|------|------|
| 1     | 11.485    | 1307374  | 85384   | 2.544  |      |      |      |
| 2     | 12.488    | 50090269 | 2075107 | 97.456 |      |      |      |
| Total |           | 51397643 | 2160491 |        |      |      |      |

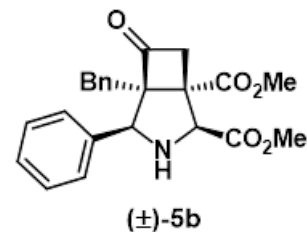

## <Sample Information>

Sample Name : LLC-2-23 IC-10%  
 Sample ID :  
 Data Filename : LLC-2-23 IC-10%.lcd

Method Filename : IC,1ml 10%IPA in Hex;60min.lcm  
 Batch Filename : 0825.lcb  
 Vial # : 1-16  
 Injection Volume : 10 uL  
 Date Acquired : 8/10/2022 10:20:53 PM  
 Date Processed : 8/10/2022 11:20:55 PM

Sample Type : Unknown  
 Acquired by : System Administrator  
 Processed by : System Administrator

## <Chromatogram>

mAU

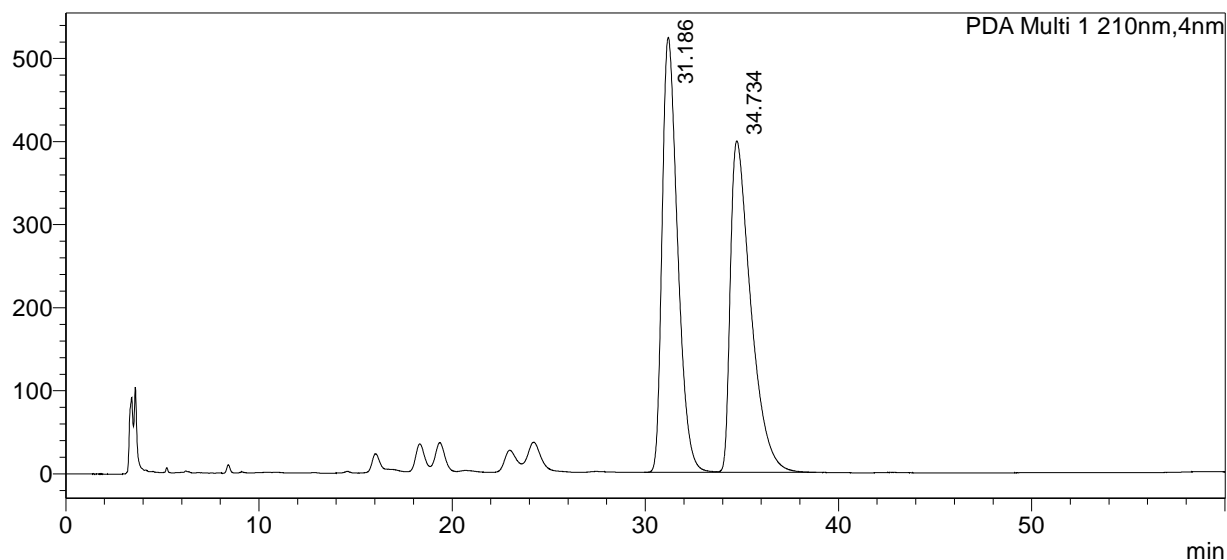

## <Peak Table>

PDA Ch1 210nm

| Peak# | Ret. Time | Area     | Height | Conc.  | Unit | Mark | Name |
|-------|-----------|----------|--------|--------|------|------|------|
| 1     | 31.186    | 29232174 | 523663 | 49.905 |      | V    |      |
| 2     | 34.734    | 29343295 | 399046 | 50.095 |      | V    |      |
| Total |           | 58575469 | 922709 |        |      |      |      |



## <Sample Information>

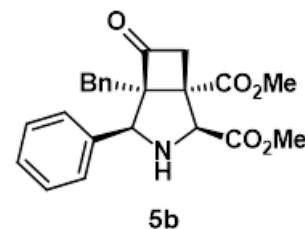

Sample Name : LLC-2-24 IC-10%  
 Sample ID :  
 Data Filename : LLC-2-24 IC-10%.lcd

Method Filename : IC,1ml 10%IPA in Hex;60min.lcm  
 Batch Filename : 0825.lcb  
 Vial # : 1-17  
 Injection Volume : 10 uL  
 Date Acquired : 8/10/2022 11:21:25 PM  
 Date Processed : 8/11/2022 12:21:28 AM

Sample Type : Unknown  
 Acquired by : System Administrator  
 Processed by : System Administrator

## <Chromatogram>

mAU

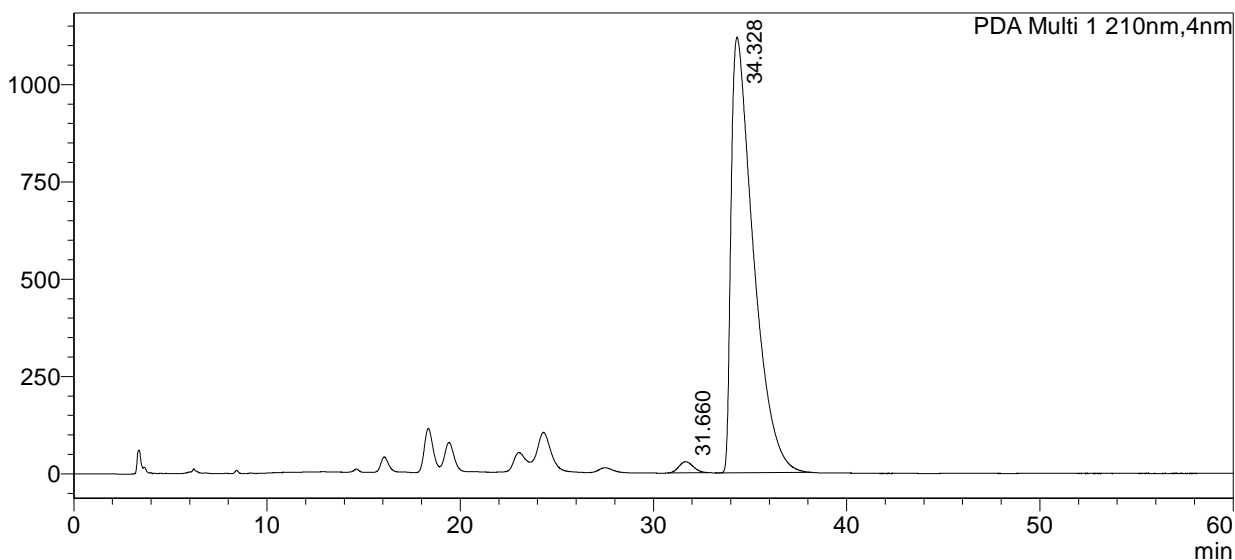

## <Peak Table>

PDA Ch1 210nm

| Peak# | Ret. Time | Area     | Height  | Conc.  | Unit | Mark | Name |
|-------|-----------|----------|---------|--------|------|------|------|
| 1     | 31.660    | 1471370  | 28537   | 1.611  |      |      |      |
| 2     | 34.328    | 89871237 | 1118491 | 98.389 |      |      |      |
| Total |           | 91342607 | 1147028 |        |      |      |      |

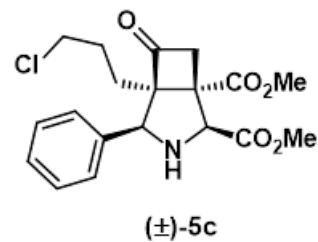

## <Sample Information>

Sample Name : LLC-2-75 IA-10%  
 Sample ID :  
 Data Filename : LLC-2-75 IA-10%.lcd

Method Filename : IA,1ml 10%IPA in Hex;60min.lcm  
 Batch Filename : 0825.lcb  
 Vial # : 1-61  
 Injection Volume : 10 uL  
 Date Acquired : 9/23/2022 9:56:27 PM  
 Date Processed : 9/23/2022 10:17:53 PM

Sample Type : Unknown  
 Acquired by : System Administrator  
 Processed by : System Administrator

## <Chromatogram>

mAU

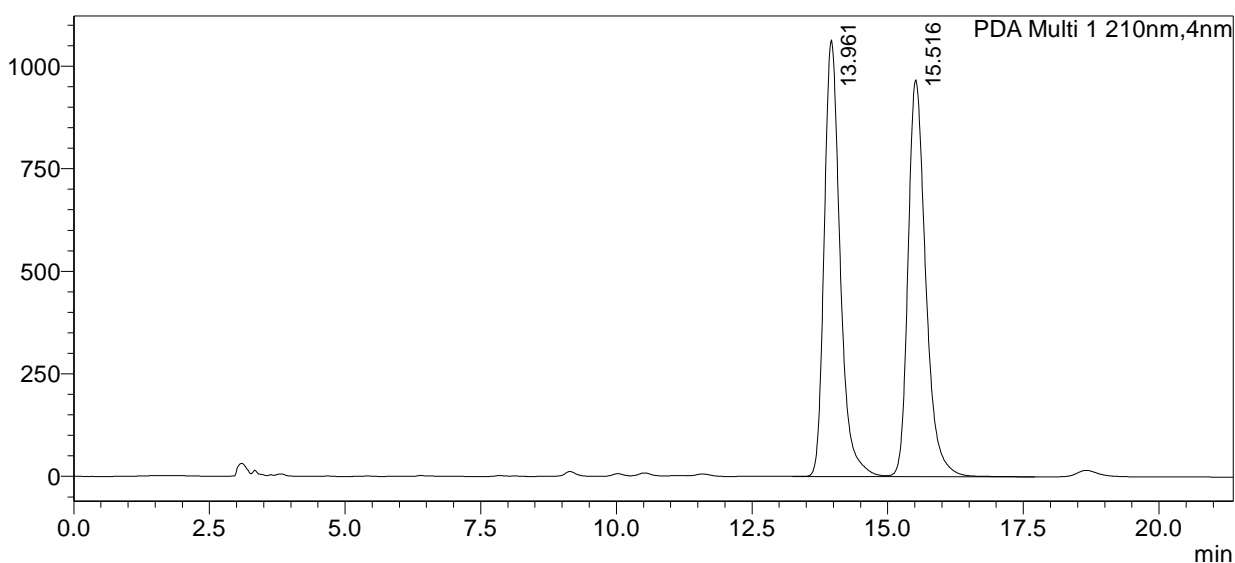

## <Peak Table>

PDA Ch1 210nm

| Peak# | Ret. Time | Area     | Height  | Conc.  | Unit | Mark | Name |
|-------|-----------|----------|---------|--------|------|------|------|
| 1     | 13.961    | 21715669 | 1063353 | 49.784 |      |      |      |
| 2     | 15.516    | 21904059 | 967078  | 50.216 |      | V    |      |
| Total |           | 43619727 | 2030431 |        |      |      |      |

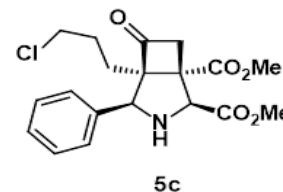

## <Sample Information>

Sample Name : LLC-2-76 IA-10%  
 Sample ID :  
 Data Filename : LLC-2-76 IA-10%.lcd

Method Filename : IA,1ml 10%IPA in Hex;30min.lcm  
 Batch Filename : 0825.lcb  
 Vial # : 1-62  
 Injection Volume : 10 uL  
 Date Acquired : 9/23/2022 10:44:47 PM  
 Date Processed : 9/23/2022 11:07:26 PM

Sample Type : Unknown  
 Acquired by : System Administrator  
 Processed by : System Administrator

## <Chromatogram>

mAU

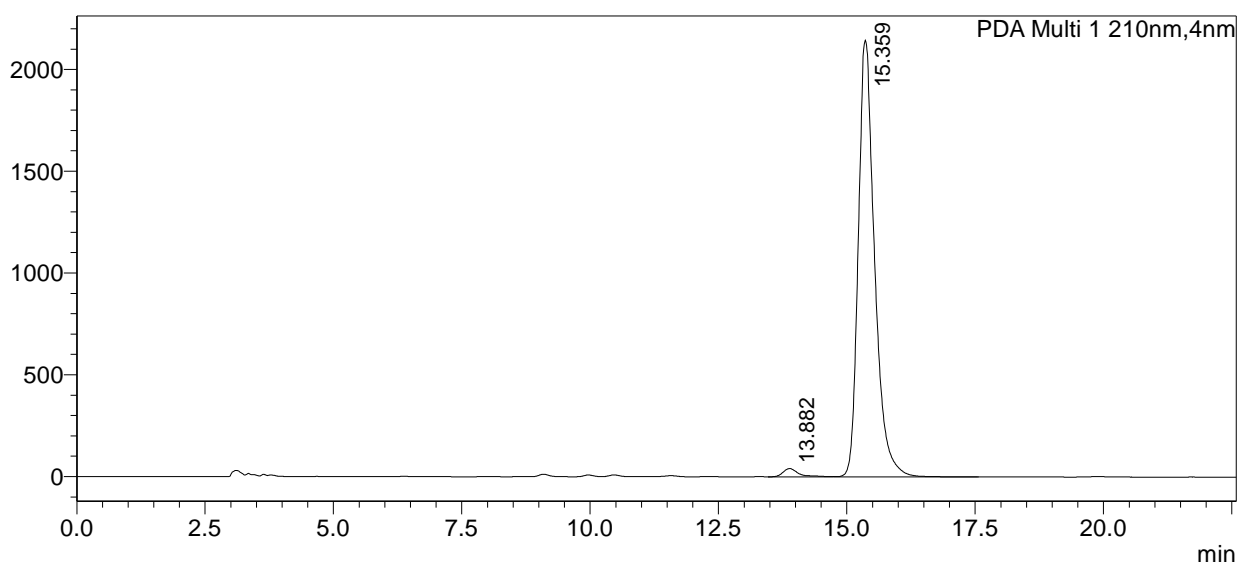

## <Peak Table>

PDA Ch1 210nm

| Peak# | Ret. Time | Area     | Height  | Conc.  | Unit | Mark | Name |
|-------|-----------|----------|---------|--------|------|------|------|
| 1     | 13.882    | 876836   | 40758   | 1.817  |      |      |      |
| 2     | 15.359    | 47380312 | 2144500 | 98.183 |      | V    |      |
| Total |           | 48257148 | 2185258 |        |      |      |      |

# Analysis Report

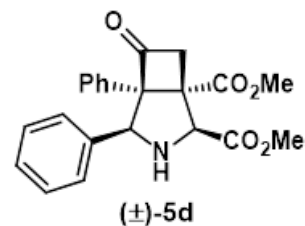

## <Sample Information>

Sample Name : LLC-1-137 IC-10%  
 Sample ID :  
 Data Filename : LLC-1-137 IC-10%.lcd

Method Filename : IC,1ml 10%IPA in Hex;60min.lcm  
 Batch Filename : 0825.lcb  
 Vial # : 1-4  
 Injection Volume : 10 uL  
 Date Acquired : 3/12/2022 6:04:05 PM  
 Date Processed : 3/12/2022 7:04:08 PM

Sample Type : Unknown  
 Acquired by : System Administrator  
 Processed by : System Administrator

## <Chromatogram>

mAU

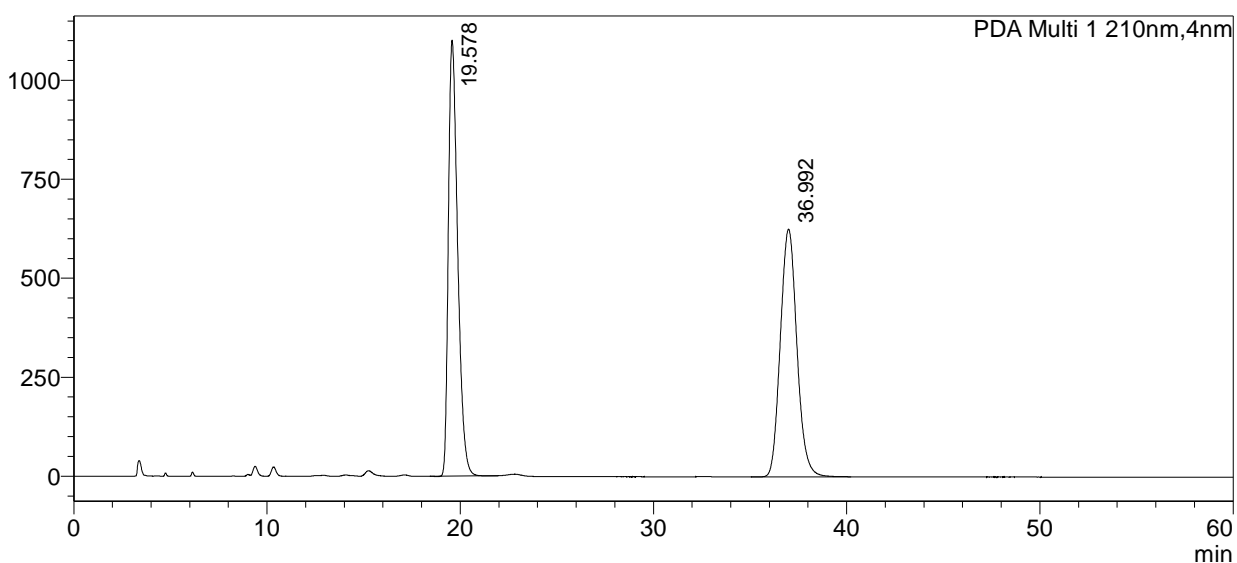

## <Peak Table>

PDA Ch1 210nm

| Peak# | Ret. Time | Area     | Height  | Conc.  | Unit | Mark | Name |
|-------|-----------|----------|---------|--------|------|------|------|
| 1     | 19.578    | 36821226 | 1100670 | 49.689 |      |      |      |
| 2     | 36.992    | 37281797 | 625784  | 50.311 |      |      |      |
| Total |           | 74103022 | 1726454 |        |      |      |      |

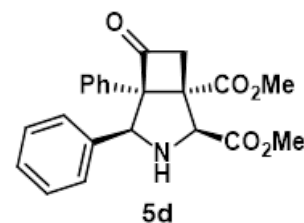

## <Sample Information>

Sample Name : LLC-1-138 IC-10%  
 Sample ID :  
 Data Filename : LLC-1-138 IC-10%.lcd

Method Filename : IC,1ml 10%IPA in Hex;60min.lcm  
 Batch Filename : 0825.lcb  
 Vial # : 1-5  
 Injection Volume : 10 uL  
 Date Acquired : 3/12/2022 7:34:23 PM  
 Date Processed : 3/12/2022 8:34:25 PM

Sample Type : Unknown  
 Acquired by : System Administrator  
 Processed by : System Administrator

## <Chromatogram>

mAU

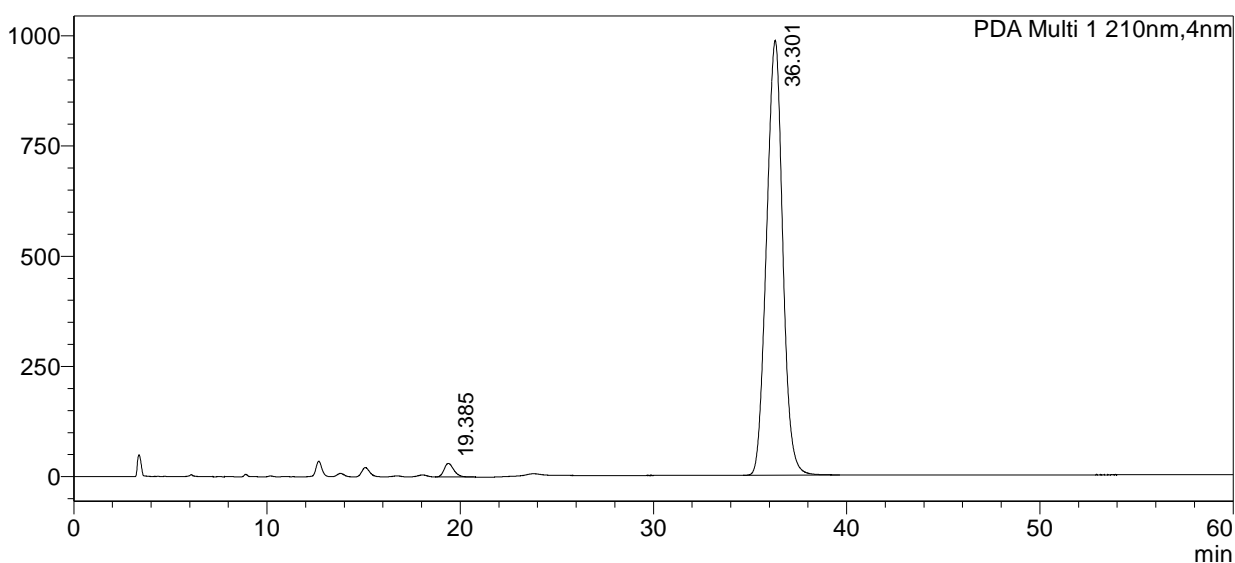

## <Peak Table>

PDA Ch1 210nm

| Peak# | Ret. Time | Area     | Height  | Conc.  | Unit | Mark | Name |
|-------|-----------|----------|---------|--------|------|------|------|
| 1     | 19.385    | 1075111  | 30953   | 1.841  |      |      |      |
| 2     | 36.301    | 57312066 | 986146  | 98.159 |      | S    |      |
| Total |           | 58387177 | 1017100 |        |      |      |      |

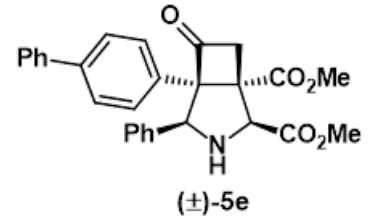

## <Sample Information>

Sample Name : LLC-2-59 IC-10%  
 Sample ID :  
 Data Filename : LLC-2-59 IC-10%.lcd

Method Filename : IC,1ml 10%IPA in Hex;60min.lcm  
 Batch Filename : 0825.lcb  
 Vial # : 1-76  
 Injection Volume : 10 uL  
 Date Acquired : 9/8/2022 1:12:59 AM  
 Date Processed : 9/8/2022 2:13:02 AM

Sample Type : Unknown  
 Acquired by : System Administrator  
 Processed by : System Administrator

## <Chromatogram>

mAU

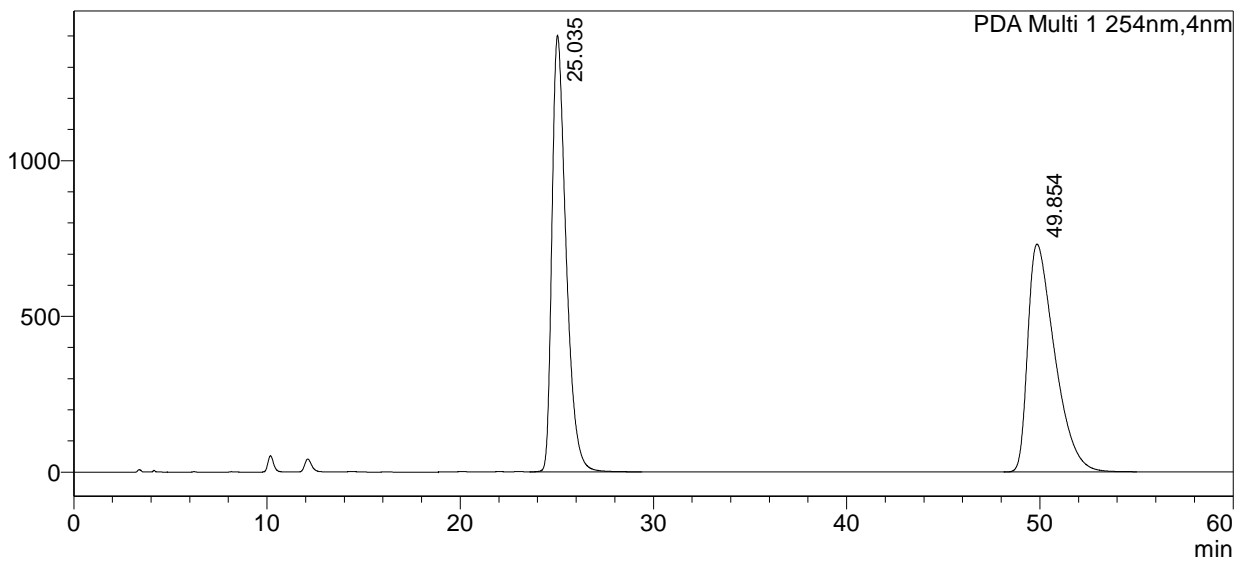

## <Peak Table>

PDA Ch1 254nm

| Peak# | Ret. Time | Area      | Height  | Conc.  | Unit | Mark | Name |
|-------|-----------|-----------|---------|--------|------|------|------|
| 1     | 25.035    | 71216461  | 1401547 | 50.167 |      |      |      |
| 2     | 49.854    | 70742046  | 731471  | 49.833 |      |      |      |
| Total |           | 141958506 | 2133018 |        |      |      |      |

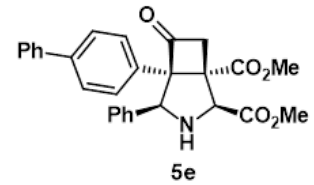

## <Sample Information>

Sample Name : LLC-2-60 IC-10%  
 Sample ID :  
 Data Filename : LLC-2-60 IC-10%.lcd

Method Filename : IC,1ml 10%IPA in Hex;60min.lcm  
 Batch Filename : 0825.lcb  
 Vial # : 1-77  
 Injection Volume : 10 uL  
 Date Acquired : 9/8/2022 2:13:33 AM  
 Date Processed : 9/8/2022 3:13:36 AM

Sample Type : Unknown  
 Acquired by : System Administrator  
 Processed by : System Administrator

## <Chromatogram>

mAU

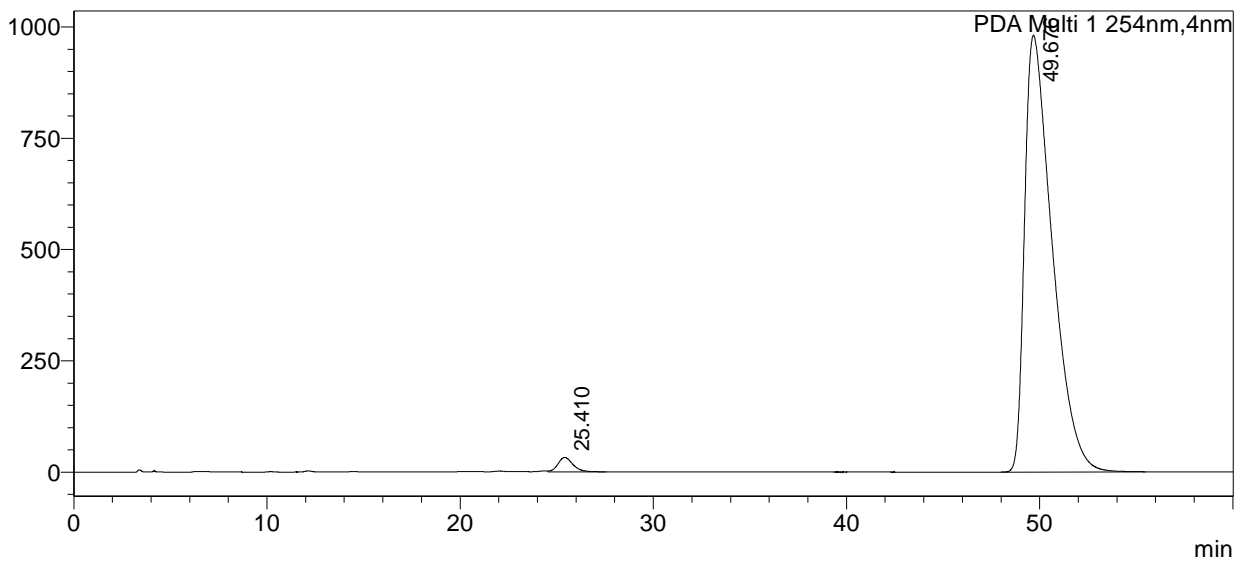

## <Peak Table>

PDA Ch1 254nm

| Peak# | Ret. Time | Area     | Height  | Conc.  | Unit | Mark | Name |
|-------|-----------|----------|---------|--------|------|------|------|
| 1     | 25.410    | 1760805  | 32479   | 1.775  |      |      |      |
| 2     | 49.676    | 97421139 | 981089  | 98.225 |      |      |      |
| Total |           | 99181944 | 1013568 |        |      |      |      |

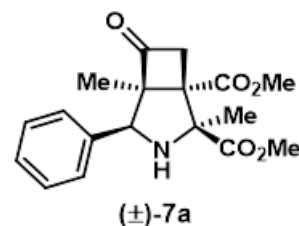

## <Sample Information>

Sample Name : LLC-1-113 ODH-10%-320-2  
 Sample ID :  
 Data Filename : LLC-1-113 ODH-10%-320-2.lcd

Method Filename : OD-H,1ml 10%IPA in Hex;40min.lcm  
 Batch Filename : 1.lcb  
 Vial # : 1-62  
 Injection Volume : 10 uL  
 Date Acquired : 3/20/2023 11:17:52 AM  
 Date Processed : 3/20/2023 11:57:55 AM

Sample Type : Unknown  
 Acquired by : System Administrator  
 Processed by : System Administrator

## <Chromatogram>

mAU

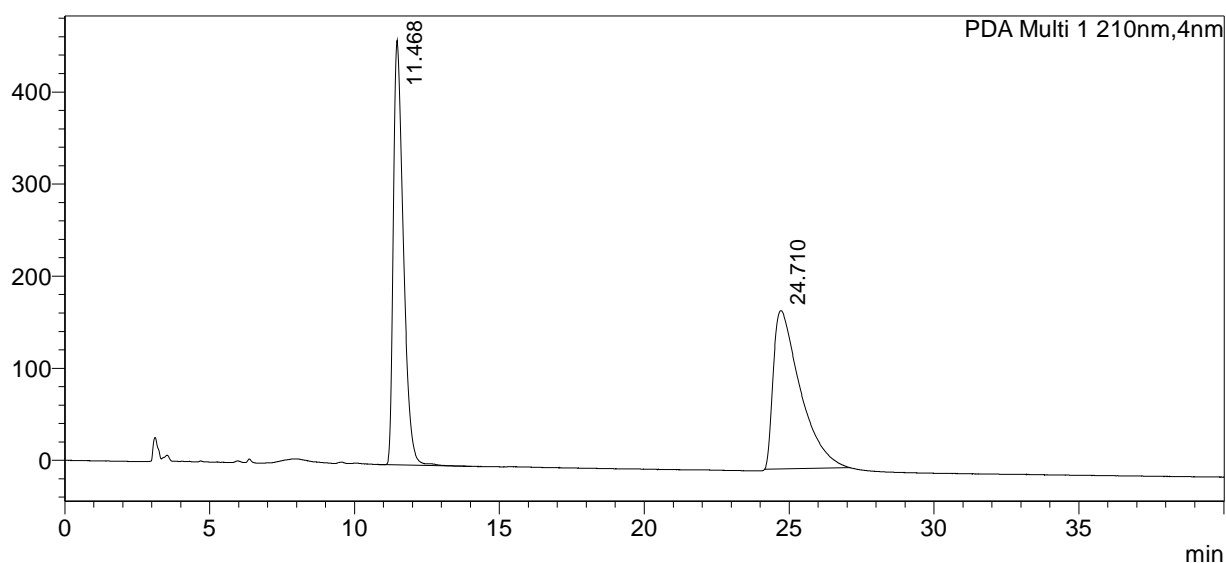

## <Peak Table>

PDA Ch1 210nm

| Peak# | Ret. Time | Area     | Height | Conc.  | Unit | Mark | Name |
|-------|-----------|----------|--------|--------|------|------|------|
| 1     | 11.468    | 11133698 | 460956 | 49.979 |      |      |      |
| 2     | 24.710    | 11143216 | 171943 | 50.021 |      |      |      |
| Total |           | 22276914 | 632899 |        |      |      |      |



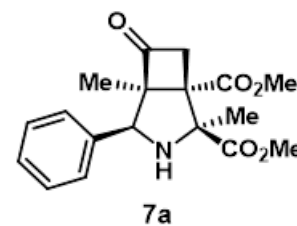

## <Sample Information>

Sample Name : LLC-3-178 ODH-10%  
 Sample ID :  
 Data Filename : LLC-3-178 ODH-10%.lcd

Method Filename : OD-H,1ml 10%IPA in Hex;40min.lcm  
 Batch Filename : 1.lcb  
 Vial # : 1-61  
 Injection Volume : 10 uL  
 Date Acquired : 3/19/2023 7:06:18 PM  
 Date Processed : 3/19/2023 7:37:06 PM

Sample Type : Unknown  
 Acquired by : System Administrator  
 Processed by : System Administrator

## <Chromatogram>

mAU

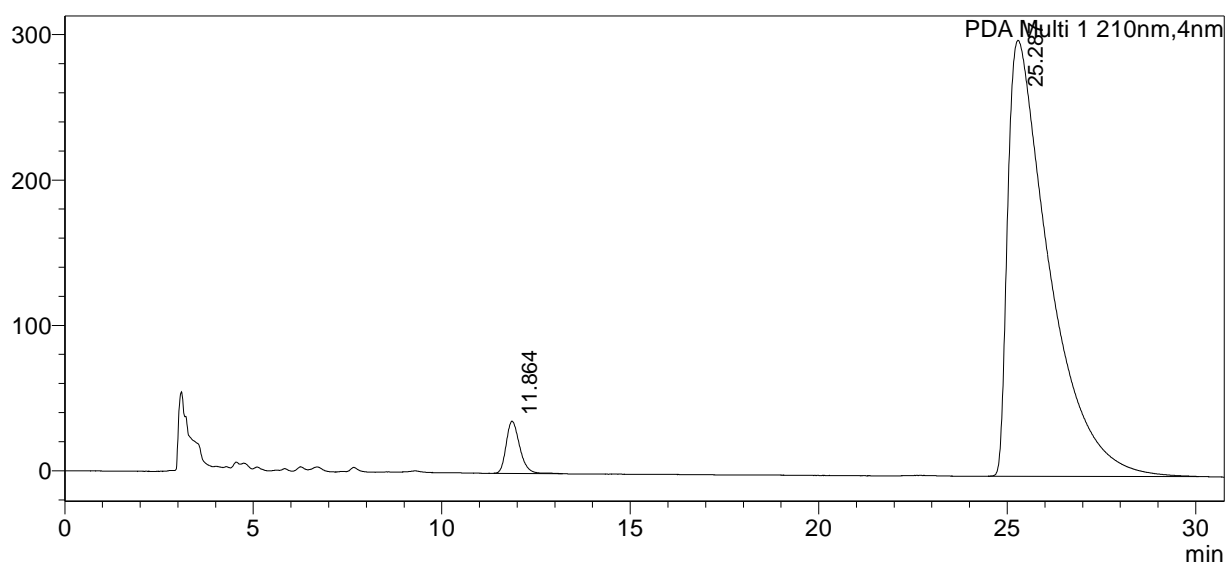

## <Peak Table>

PDA Ch1 210nm

| Peak# | Ret. Time | Area     | Height | Conc.  | Unit | Mark | Name |
|-------|-----------|----------|--------|--------|------|------|------|
| 1     | 11.864    | 893825   | 35892  | 3.740  |      |      |      |
| 2     | 25.287    | 23003828 | 299957 | 96.260 |      | SV   |      |
| Total |           | 23897653 | 335849 |        |      |      |      |

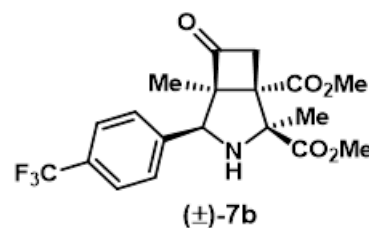

## <Sample Information>

Sample Name : LLC-2-45 IA-10%  
 Sample ID :  
 Data Filename : LLC-2-45 IA-10%.lcd

Method Filename : IA,1ml 10%IPA in Hex;60min.lcm  
 Batch Filename : 0825.lcb  
 Vial # : 1-2  
 Injection Volume : 10 uL  
 Date Acquired : 9/1/2022 9:46:41 AM  
 Date Processed : 9/1/2022 10:39:13 AM

Sample Type : Unknown  
 Acquired by : System Administrator  
 Processed by : System Administrator

## <Chromatogram>

mAU

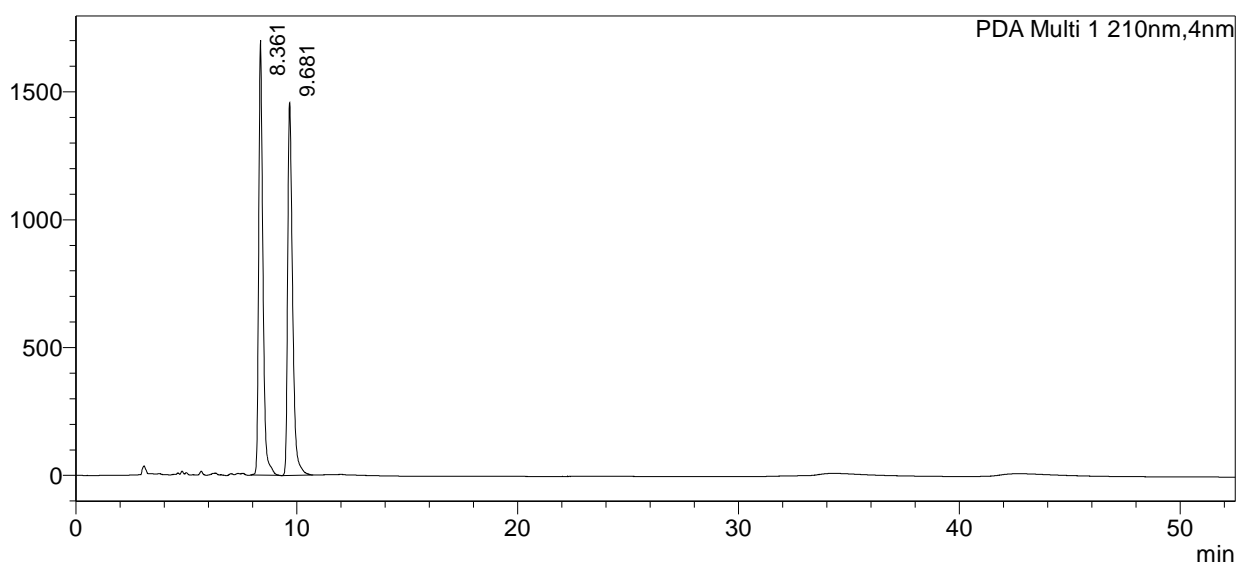

## <Peak Table>

PDA Ch1 210nm

| Peak# | Ret. Time | Area     | Height  | Conc.  | Unit | Mark | Name |
|-------|-----------|----------|---------|--------|------|------|------|
| 1     | 8.361     | 22439592 | 1699987 | 49.948 |      |      |      |
| 2     | 9.681     | 22486251 | 1457177 | 50.052 |      |      |      |
| Total |           | 44925843 | 3157165 |        |      |      |      |

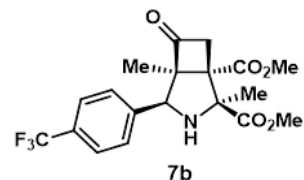

## <Sample Information>

Sample Name : LLC-4-4 IA-10%  
 Sample ID :  
 Data Filename : LLC-4-4 IA-10%.lcd

Method Filename : IA,1ml 10%IPA in Hex;20min.lcm  
 Batch Filename : 1.lcb  
 Vial # : 1-61  
 Injection Volume : 10 uL  
 Date Acquired : 3/30/2023 10:01:19 AM  
 Date Processed : 3/30/2023 10:21:22 AM

Sample Type : Unknown  
 Acquired by : System Administrator  
 Processed by : System Administrator

## <Chromatogram>

mAU

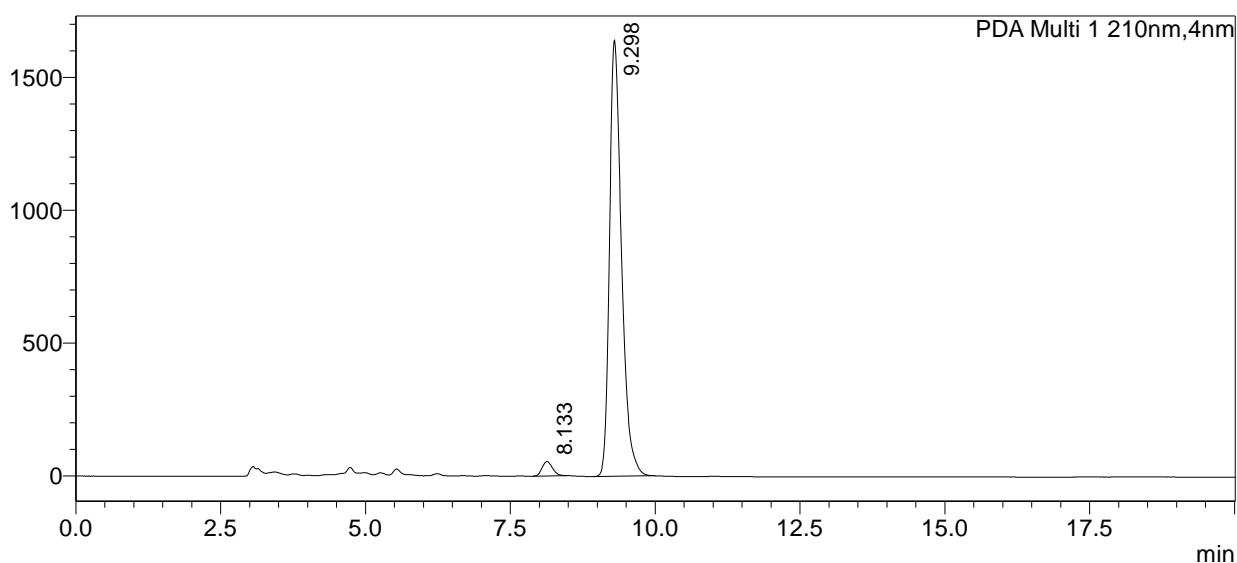

## <Peak Table>

PDA Ch1 210nm

| Peak# | Ret. Time | Area     | Height  | Conc.  | Unit | Mark | Name |
|-------|-----------|----------|---------|--------|------|------|------|
| 1     | 8.133     | 680263   | 54299   | 2.794  |      |      |      |
| 2     | 9.298     | 23665173 | 1640510 | 97.206 |      |      |      |
| Total |           | 24345436 | 1694809 |        |      |      |      |

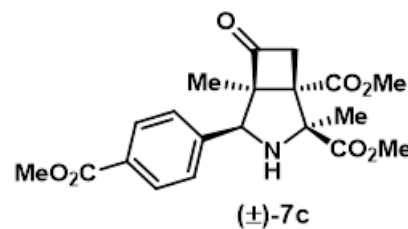

## <Sample Information>

Sample Name : LLC-2-102 IA-20%  
 Sample ID :  
 Data Filename : LLC-2-102 IA-20%.lcd

Method Filename : IA,1ml 20%IPA in Hex;60min.lcm  
 Batch Filename : 0825.lcb  
 Vial # : 1-91  
 Injection Volume : 10 uL  
 Date Acquired : 10/6/2022 9:53:17 AM  
 Date Processed : 10/6/2022 10:31:33 AM

Sample Type : Unknown  
 Acquired by : System Administrator  
 Processed by : System Administrator

## <Chromatogram>

mAU

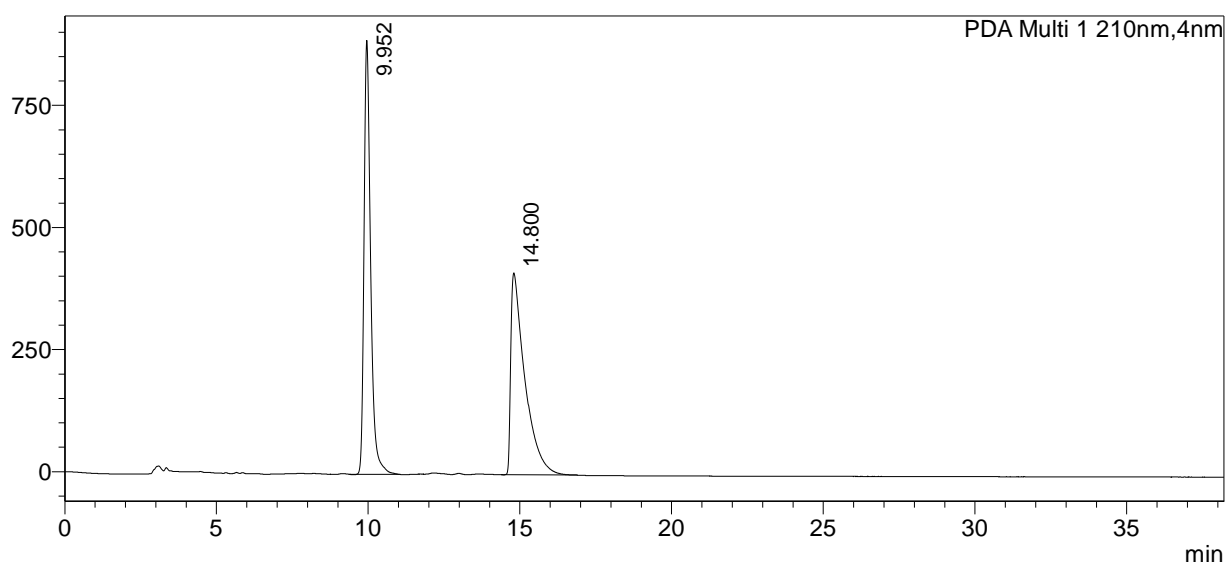

## <Peak Table>

PDA Ch1 210nm

| Peak# | Ret. Time | Area     | Height  | Conc.  | Unit | Mark | Name |
|-------|-----------|----------|---------|--------|------|------|------|
| 1     | 9.952     | 13589822 | 888535  | 50.325 |      |      |      |
| 2     | 14.800    | 13414527 | 413153  | 49.675 |      |      |      |
| Total |           | 27004349 | 1301688 |        |      |      |      |

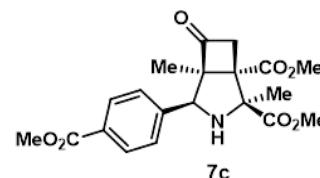

## <Sample Information>

Sample Name : LLC-3-195 IA-20%  
 Sample ID :  
 Data Filename : LLC-3-195 IA-20%.lcd

Method Filename : IA,1ml 20%IPA in Hex;40min.lcm  
 Batch Filename : 1.lcb  
 Vial # : 1-79  
 Injection Volume : 10 uL  
 Date Acquired : 3/25/2023 12:52:03 AM  
 Date Processed : 3/25/2023 1:32:05 AM

Sample Type : Unknown  
 Acquired by : System Administrator  
 Processed by : System Administrator

## <Chromatogram>

mAU

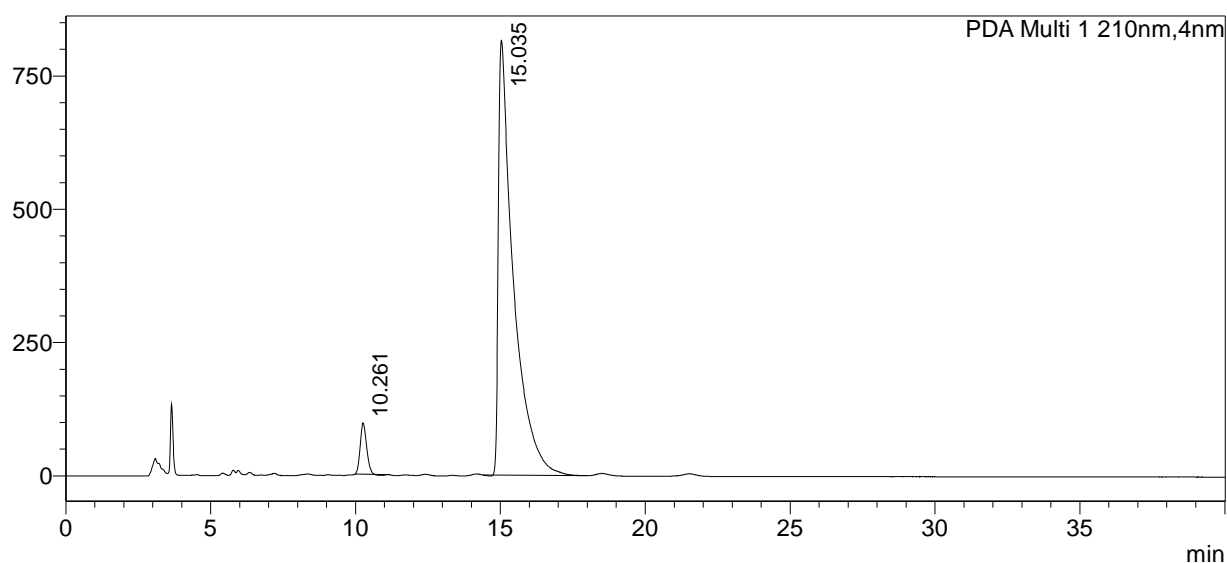

## <Peak Table>

PDA Ch1 210nm

| Peak# | Ret. Time | Area     | Height | Conc.  | Unit | Mark | Name |
|-------|-----------|----------|--------|--------|------|------|------|
| 1     | 10.261    | 1453879  | 96216  | 4.718  |      |      |      |
| 2     | 15.035    | 29361922 | 815549 | 95.282 |      |      |      |
| Total |           | 30815800 | 911765 |        |      |      |      |

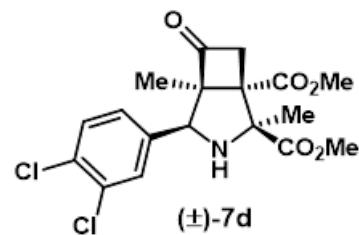

## <Sample Information>

Sample Name : LLC-2-48 IA-5%  
 Sample ID :  
 Data Filename : LLC-2-48 IA-5%.lcd

Method Filename : IA,1ml 5%IPA in Hex;40min.lcm  
 Batch Filename : 0825.lcb  
 Vial # : 1-16  
 Injection Volume : 10 uL  
 Date Acquired : 9/5/2022 4:47:05 PM  
 Date Processed : 9/5/2022 5:27:07 PM

Sample Type : Unknown  
 Acquired by : System Administrator  
 Processed by : System Administrator

## <Chromatogram>

mAU

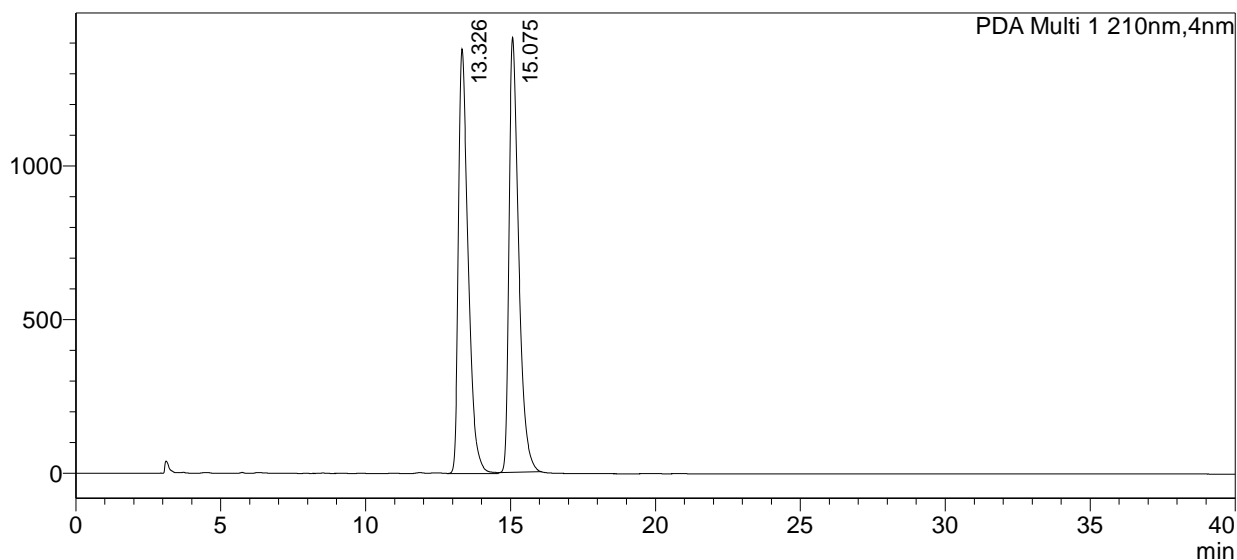

## <Peak Table>

PDA Ch1 210nm

| Peak# | Ret. Time | Area     | Height  | Conc.  | Unit | Mark | Name |
|-------|-----------|----------|---------|--------|------|------|------|
| 1     | 13.326    | 32359148 | 1381499 | 49.654 |      |      |      |
| 2     | 15.075    | 32809892 | 1414584 | 50.346 |      |      |      |
| Total |           | 65169040 | 2796082 |        |      |      |      |

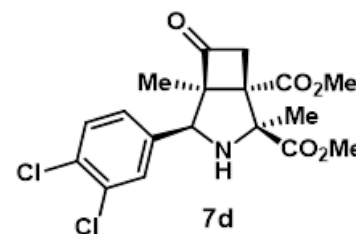

## <Sample Information>

Sample Name : LLC-4-8 IA-5%  
 Sample ID :  
 Data Filename : LLC-4-8 IA-5%.lcd

Method Filename : IA,1ml 5%IPA in Hex;25min.lcm  
 Batch Filename : 1.lcb  
 Vial # : 1-92  
 Injection Volume : 10 uL  
 Date Acquired : 3/31/2023 12:39:20 PM  
 Date Processed : 3/31/2023 1:04:23 PM

Sample Type : Unknown  
 Acquired by : System Administrator  
 Processed by : System Administrator

## <Chromatogram>

mAU

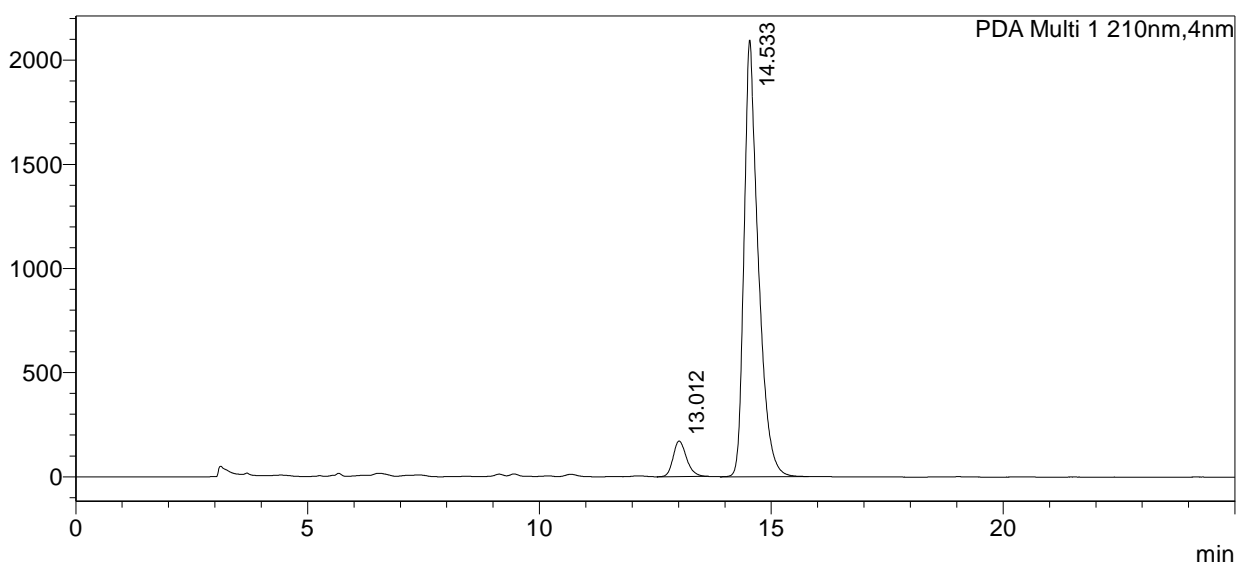

## <Peak Table>

PDA Ch1 210nm

| Peak# | Ret. Time | Area     | Height  | Conc.  | Unit | Mark | Name |
|-------|-----------|----------|---------|--------|------|------|------|
| 1     | 13.012    | 3438268  | 170740  | 7.143  |      |      |      |
| 2     | 14.533    | 44699355 | 2094589 | 92.857 |      |      |      |
| Total |           | 48137623 | 2265329 |        |      |      |      |

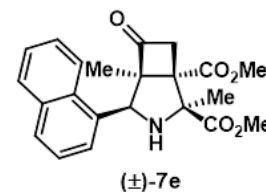

## <Sample Information>

Sample Name : LLC-3-198 IA-10%  
 Sample ID :  
 Data Filename : LLC-3-198 IA-10%.lcd

Method Filename : IA,1ml 10%IPA in Hex;30min.lcm  
 Batch Filename : 1.lcb  
 Vial # : 1-63  
 Injection Volume : 10 uL  
 Date Acquired : 3/27/2023 9:19:35 PM  
 Date Processed : 3/27/2023 9:49:37 PM

Sample Type : Unknown  
 Acquired by : System Administrator  
 Processed by : System Administrator

## <Chromatogram>

mAU

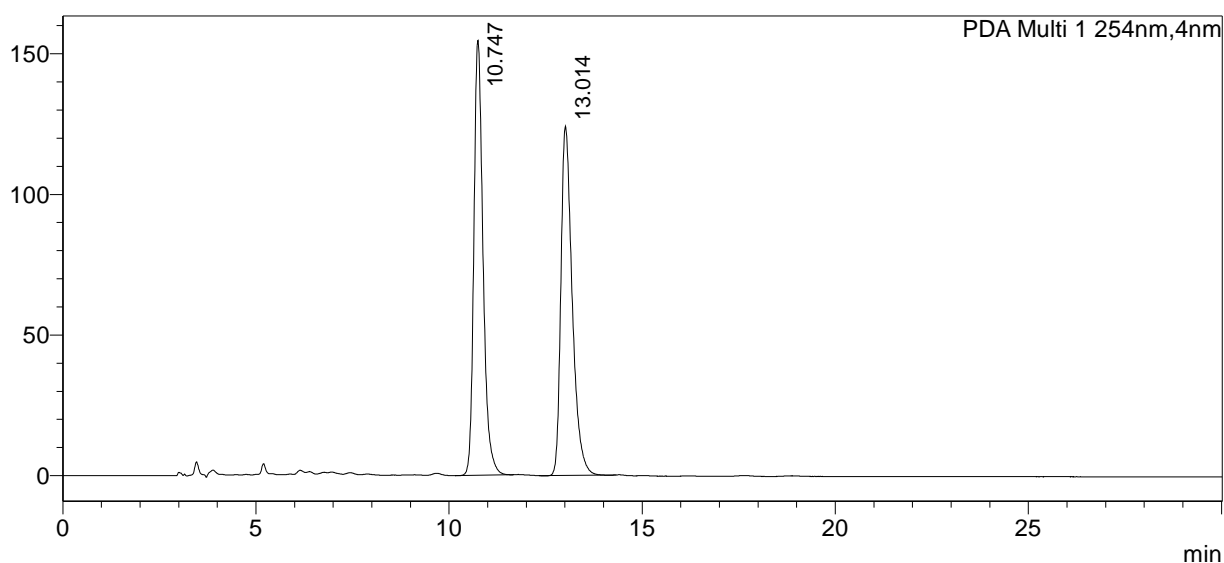

## <Peak Table>

PDA Ch1 254nm

| Peak# | Ret. Time | Area    | Height | Conc.  | Unit | Mark | Name |
|-------|-----------|---------|--------|--------|------|------|------|
| 1     | 10.747    | 2549616 | 154644 | 50.203 |      |      |      |
| 2     | 13.014    | 2528948 | 124232 | 49.797 |      |      |      |
| Total |           | 5078564 | 278876 |        |      |      |      |



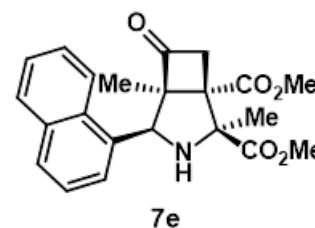

## <Sample Information>

Sample Name : LLC-3-190 IA-10%  
 Sample ID :  
 Data Filename : LLC-3-190 IA-10%.lcd

Method Filename : IA,1ml 10%IPA in Hex;20min.lcm  
 Batch Filename : 1.lcb  
 Vial # : 1-61  
 Injection Volume : 10 uL  
 Date Acquired : 3/23/2023 4:18:26 PM  
 Date Processed : 3/23/2023 4:38:28 PM

Sample Type : Unknown  
 Acquired by : System Administrator  
 Processed by : System Administrator

## <Chromatogram>

mAU

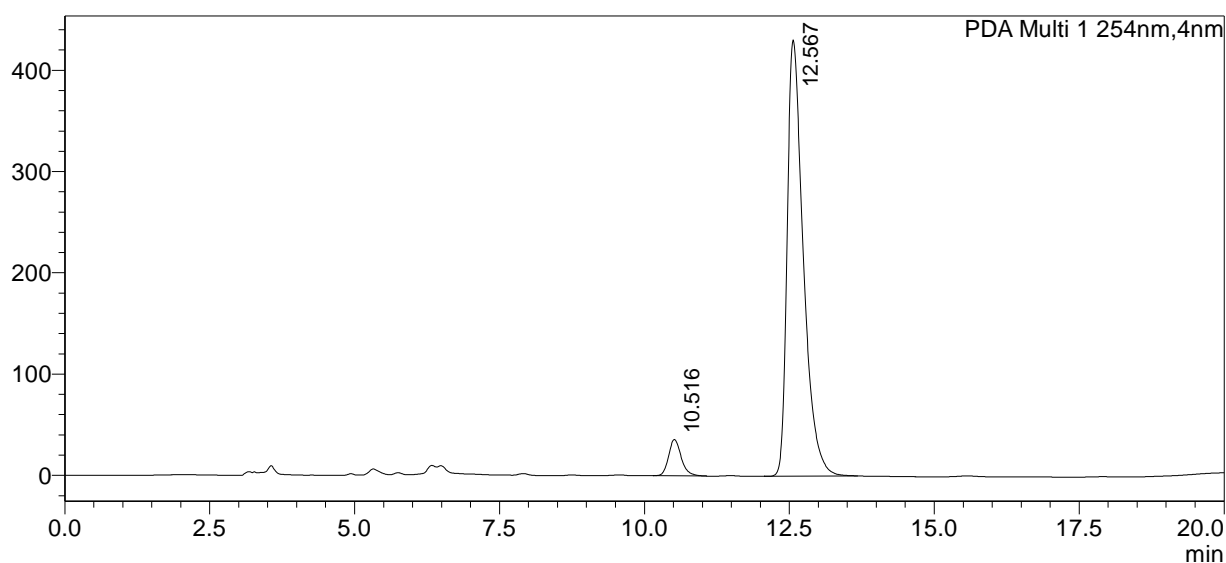

## <Peak Table>

PDA Ch1 254nm

| Peak# | Ret. Time | Area    | Height | Conc.  | Unit | Mark | Name |
|-------|-----------|---------|--------|--------|------|------|------|
| 1     | 10.516    | 545880  | 35877  | 6.141  |      |      |      |
| 2     | 12.567    | 8343756 | 430348 | 93.859 |      |      |      |
| Total |           | 8889636 | 466225 |        |      |      |      |

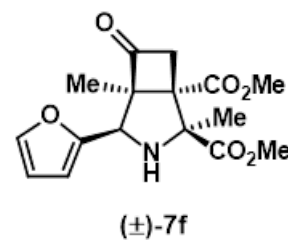

## <Sample Information>

Sample Name : LLC-4-9-1 ODH-10%  
 Sample ID :  
 Data Filename : LLC-4-9-1 ODH-10%.lcd

Method Filename : OD-H,1ml 10%IPA in Hex;20min.lcm  
 Batch Filename : 1.lcb  
 Vial # : 1-1  
 Injection Volume : 10 uL  
 Date Acquired : 4/1/2023 7:14:05 PM  
 Date Processed : 4/1/2023 7:34:07 PM

Sample Type : Unknown  
 Acquired by : System Administrator  
 Processed by : System Administrator

## <Chromatogram>

mAU

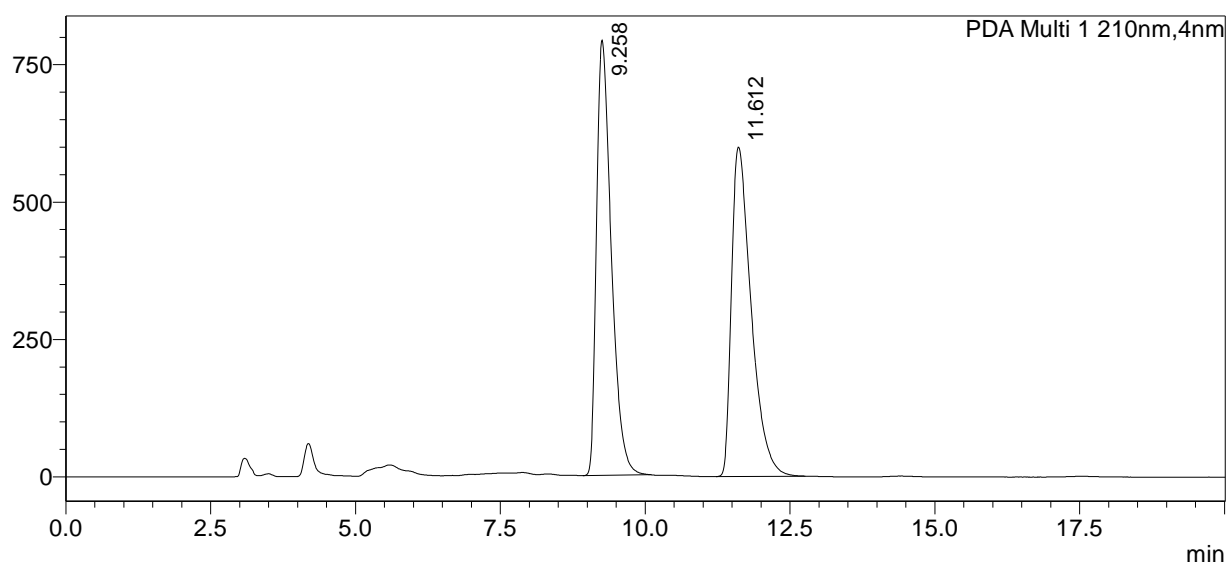

## <Peak Table>

PDA Ch1 210nm

| Peak# | Ret. Time | Area     | Height  | Conc.  | Unit | Mark | Name |
|-------|-----------|----------|---------|--------|------|------|------|
| 1     | 9.258     | 14053348 | 791625  | 49.828 |      |      |      |
| 2     | 11.612    | 14150518 | 599360  | 50.172 |      |      |      |
| Total |           | 28203866 | 1390985 |        |      |      |      |

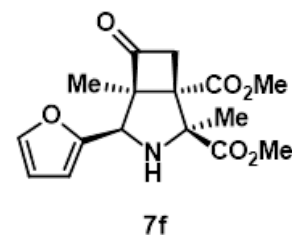

## <Sample Information>

Sample Name : LLC-3-194 ODH-10%  
 Sample ID :  
 Data Filename : LLC-3-194 ODH-10%.lcd

Method Filename : OD-H,1ml 10%IPA in Hex;30min.lcm  
 Batch Filename : 1.lcb  
 Vial # : 1-78  
 Injection Volume : 10 uL  
 Date Acquired : 3/25/2023 12:01:17 AM  
 Date Processed : 3/25/2023 12:31:19 AM

Sample Type : Unknown  
 Acquired by : System Administrator  
 Processed by : System Administrator

## <Chromatogram>

mAU

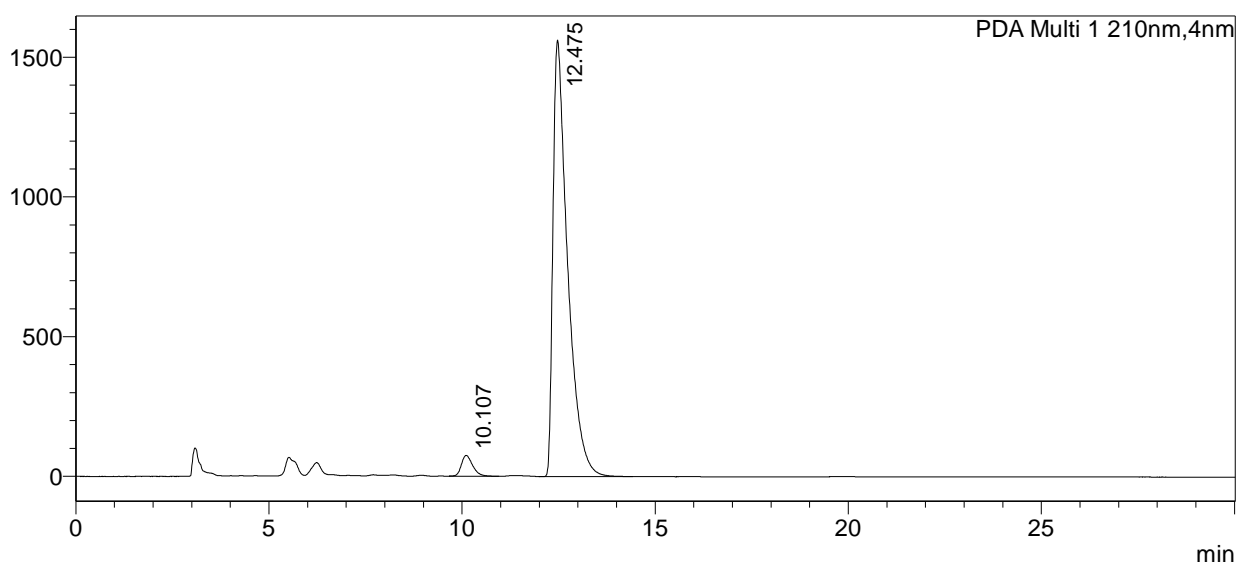

## <Peak Table>

PDA Ch1 210nm

| Peak# | Ret. Time | Area     | Height  | Conc.  | Unit | Mark | Name |
|-------|-----------|----------|---------|--------|------|------|------|
| 1     | 10.107    | 1514600  | 74389   | 3.550  |      |      |      |
| 2     | 12.475    | 41145555 | 1560903 | 96.450 |      |      |      |
| Total |           | 42660156 | 1635292 |        |      |      |      |

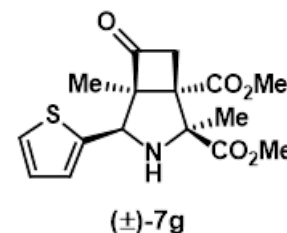

## <Sample Information>

Sample Name : LLC-2-183 ADH-10%  
 Sample ID :  
 Data Filename : LLC-2-183 ADH-10%.lcd

Method Filename : AD-H; 1 ml; 10%IPA in Hex; 40min.lcm  
 Batch Filename : 20221007.lcb  
 Vial # : 1-61  
 Injection Volume : 10 uL  
 Date Acquired : 11/27/2022 9:50:00 PM  
 Date Processed : 11/27/2022 10:30:03 PM

Sample Type : Unknown  
 Acquired by : System Administrator  
 Processed by : System Administrator

## <Chromatogram>

mAU

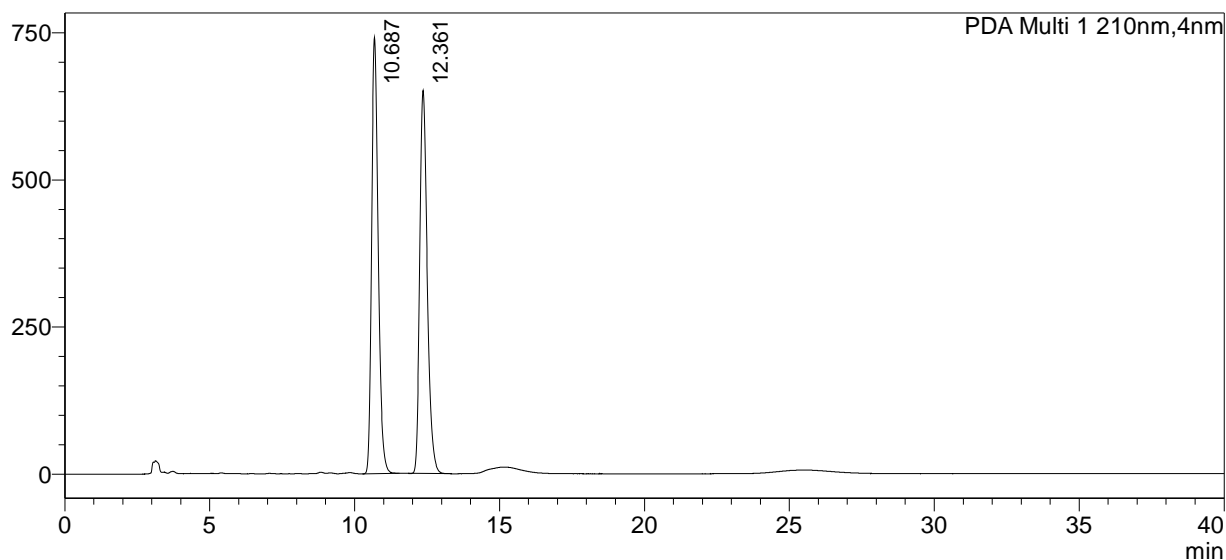

## <Peak Table>

PDA Ch1 210nm

| Peak# | Ret. Time | Area     | Height  | Conc.  | Unit | Mark | Name |
|-------|-----------|----------|---------|--------|------|------|------|
| 1     | 10.687    | 11784639 | 741482  | 50.070 |      |      |      |
| 2     | 12.361    | 11751538 | 650983  | 49.930 |      |      |      |
| Total |           | 23536178 | 1392466 |        |      |      |      |

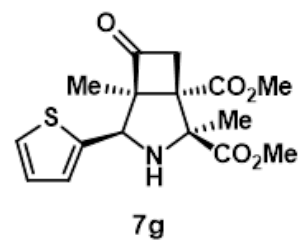

## <Sample Information>

Sample Name : LLC-3-185 ADH-10%  
 Sample ID :  
 Data Filename : LLC-3-185 ADH-10%.lcd

Method Filename : AD-H; 1 ml; 10%IPA in Hex;20 min.lcm

Batch Filename : 1.lcb

Vial # : 1-47

Injection Volume : 10 uL

Date Acquired : 3/21/2023 8:00:51 PM

Date Processed : 3/21/2023 8:17:34 PM

Sample Type : Unknown

Acquired by : System Administrator

Processed by : System Administrator

## <Chromatogram>

mAU

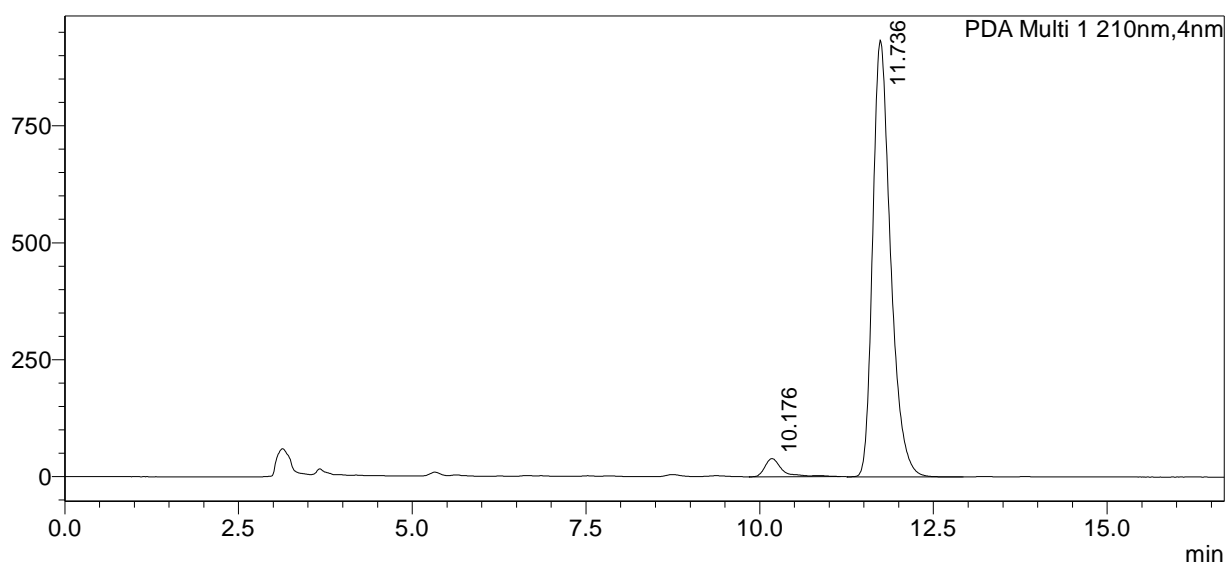

## <Peak Table>

PDA Ch1 210nm

| Peak# | Ret. Time | Area     | Height | Conc.  | Unit | Mark | Name |
|-------|-----------|----------|--------|--------|------|------|------|
| 1     | 10.176    | 669787   | 38889  | 3.861  |      |      |      |
| 2     | 11.736    | 16676599 | 932666 | 96.139 |      |      |      |
| Total |           | 17346386 | 971555 |        |      |      |      |

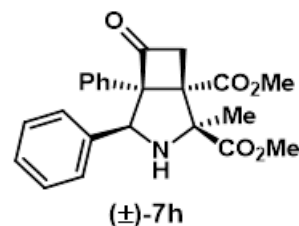

## <Sample Information>

Sample Name : LLC-4-43 ODH-10%  
 Sample ID :  
 Data Filename : LLC-4-43 ODH-10%.lcd

Method Filename : OD-H,1ml 10%IPA in Hex;30min.lcm  
 Batch Filename : 1.lcb  
 Vial # : 1-31  
 Injection Volume : 10 uL  
 Date Acquired : 4/16/2023 2:38:38 PM  
 Date Processed : 4/16/2023 3:08:41 PM

Sample Type : Unknown  
 Acquired by : System Administrator  
 Processed by : System Administrator

## <Chromatogram>

mAU

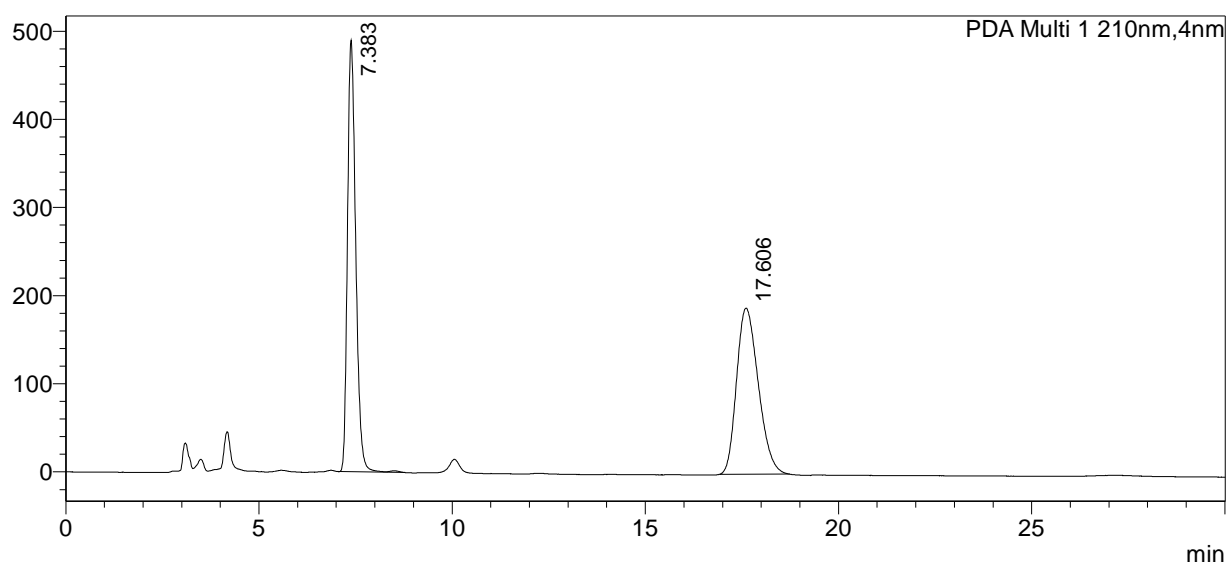

## <Peak Table>

PDA Ch1 210nm

| Peak# | Ret. Time | Area     | Height | Conc.  | Unit | Mark | Name |
|-------|-----------|----------|--------|--------|------|------|------|
| 1     | 7.383     | 7294455  | 489348 | 49.795 |      |      |      |
| 2     | 17.606    | 7354485  | 188379 | 50.205 |      |      |      |
| Total |           | 14648940 | 677726 |        |      |      |      |

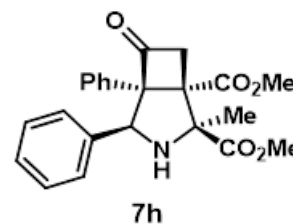

## <Sample Information>

Sample Name : LLC-4-30-ap ODH-10%  
 Sample ID :  
 Data Filename : LLC-4-30-ap ODH-10%.lcd

Method Filename : OD-H,1ml 10%IPA in Hex;30min.lcm  
 Batch Filename : 1.lcb  
 Vial # : 1-33  
 Injection Volume : 10 uL  
 Date Acquired : 4/12/2023 12:30:17 AM  
 Date Processed : 4/12/2023 1:00:20 AM

Sample Type : Unknown  
 Acquired by : System Administrator  
 Processed by : System Administrator

## <Chromatogram>

mAU

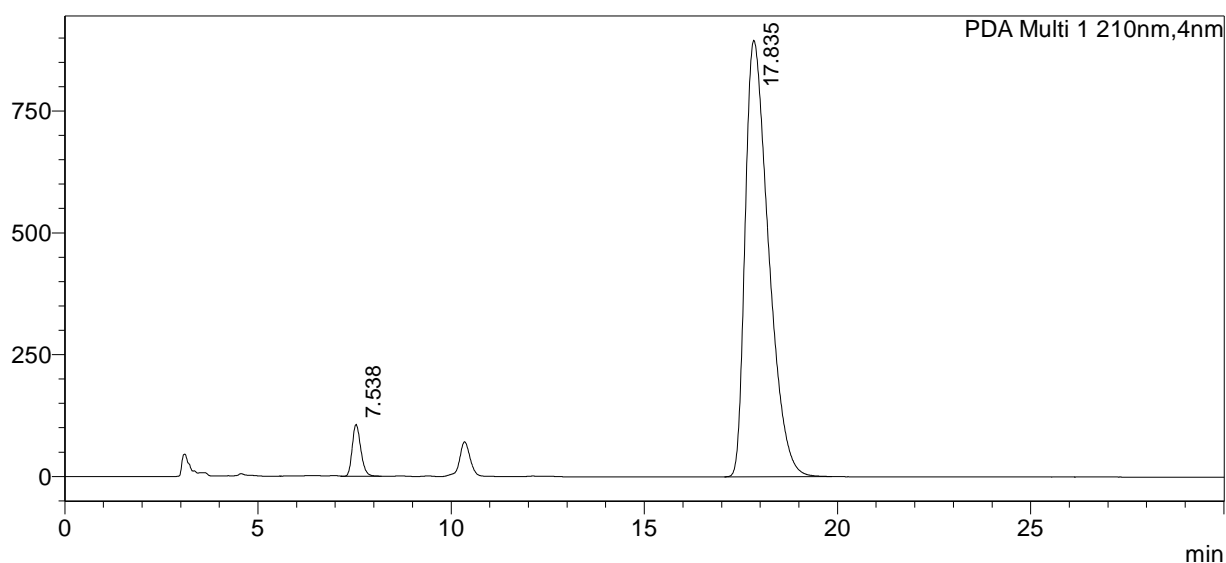

## <Peak Table>

PDA Ch1 210nm

| Peak# | Ret. Time | Area     | Height  | Conc.  | Unit | Mark | Name |
|-------|-----------|----------|---------|--------|------|------|------|
| 1     | 7.538     | 1637990  | 106033  | 4.176  |      |      |      |
| 2     | 17.835    | 37590084 | 895540  | 95.824 |      |      |      |
| Total |           | 39228074 | 1001573 |        |      |      |      |

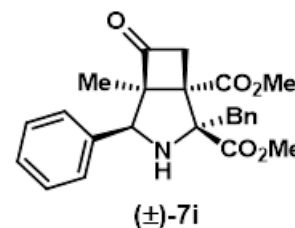

## <Sample Information>

Sample Name : LLC-3-96 ADH-5%  
 Sample ID :  
 Data Filename : LLC-3-96 ADH-5%001.lcd

Method Filename : AD-H; 1 ml; 5%IPA in Hex; 60min.lcm  
 Batch Filename : 1.lcb  
 Vial # : 1-19  
 Injection Volume : 10 uL  
 Date Acquired : 4/29/2023 12:56:27 AM  
 Date Processed : 4/29/2023 1:56:30 AM

Sample Type : Unknown  
 Acquired by : System Administrator  
 Processed by : System Administrator

## <Chromatogram>

mAU

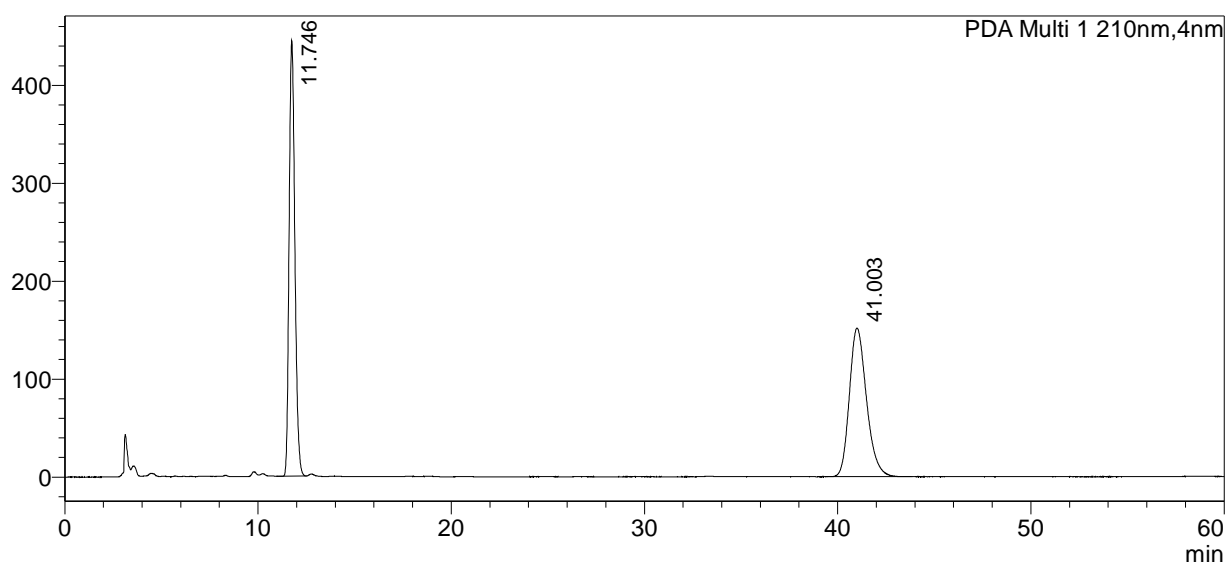

## <Peak Table>

PDA Ch1 210nm

| Peak# | Ret. Time | Area     | Height | Conc.  | Unit | Mark | Name |
|-------|-----------|----------|--------|--------|------|------|------|
| 1     | 11.746    | 9204295  | 444954 | 49.629 |      |      |      |
| 2     | 41.003    | 9341726  | 151797 | 50.371 |      |      |      |
| Total |           | 18546021 | 596751 |        |      |      |      |



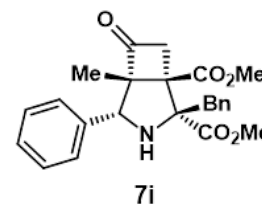

## <Sample Information>

Sample Name : LLC-4-70 ADH-5%  
 Sample ID :  
 Data Filename : LLC-4-70 ADH-5%.lcd

Method Filename : AD-H; 1 ml; 5%IPA in Hex; 60min.lcm

Batch Filename : 1.lcb

Vial # : 1-18

Injection Volume : 10 uL

Date Acquired : 4/28/2023 11:55:54 PM

Date Processed : 4/29/2023 12:55:56 AM

Sample Type : Unknown

Acquired by : System Administrator

Processed by : System Administrator

## <Chromatogram>

mAU

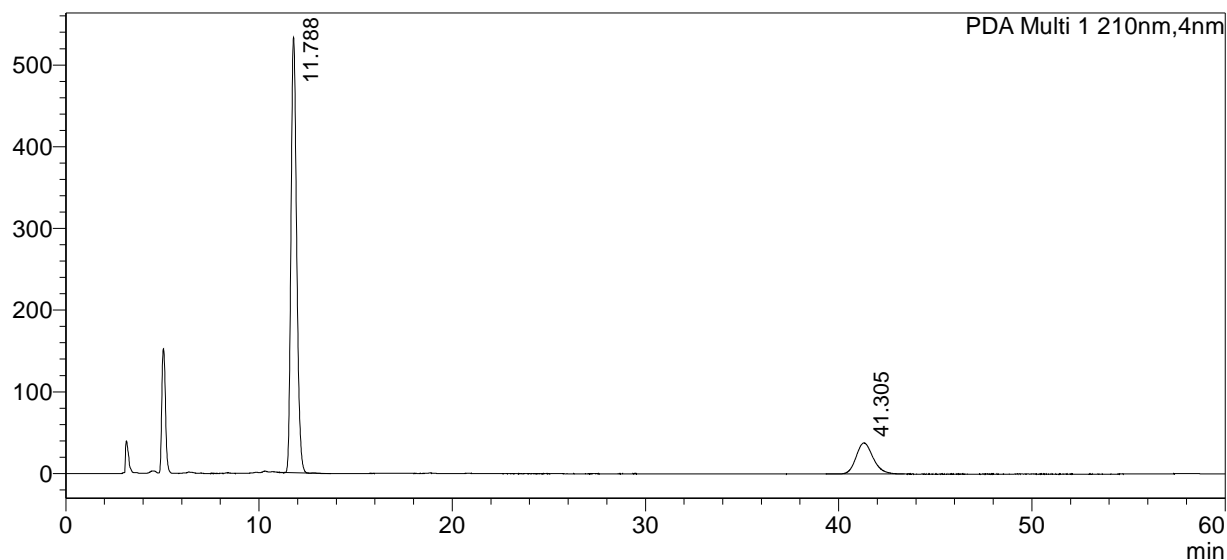

## <Peak Table>

PDA Ch1 210nm

| Peak# | Ret. Time | Area     | Height | Conc.  | Unit | Mark | Name |
|-------|-----------|----------|--------|--------|------|------|------|
| 1     | 11.788    | 10860778 | 532674 | 82.337 |      |      |      |
| 2     | 41.305    | 2329866  | 37981  | 17.663 |      |      |      |
| Total |           | 13190644 | 570655 |        |      |      |      |

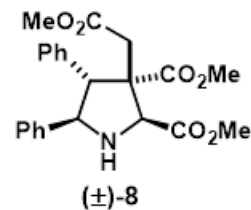

## <Sample Information>

Sample Name : LLC-2-88 ADH-10%-2  
 Sample ID :  
 Data Filename : LLC-2-88 ADH-10%-3.lcd

Method Filename : AD-H; 1 ml; 10%IPA in Hex; 40min.lcm  
 Batch Filename : 20221007.lcb  
 Vial # : 1-33  
 Injection Volume : 10 uL  
 Date Acquired : 1/3/2023 2:52:08 PM  
 Date Processed : 1/3/2023 3:32:10 PM

Sample Type : Unknown  
 Acquired by : System Administrator  
 Processed by : System Administrator

## <Chromatogram>

mAU

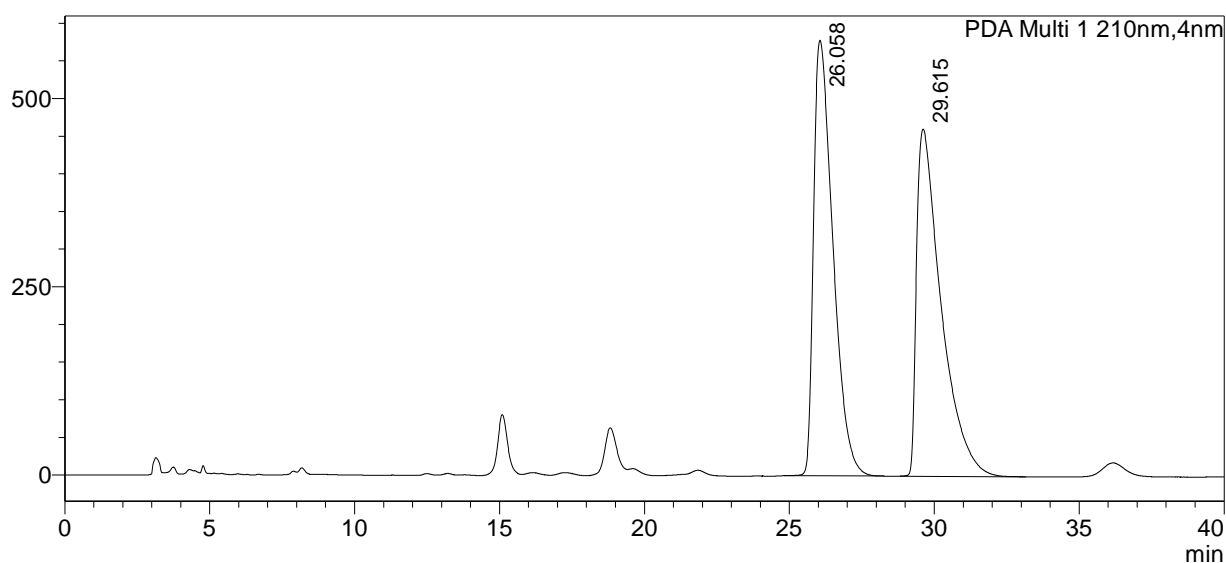

## <Peak Table>

PDA Ch1 210nm

| Peak# | Ret. Time | Area     | Height  | Conc.  | Unit | Mark | Name |
|-------|-----------|----------|---------|--------|------|------|------|
| 1     | 26.058    | 26888427 | 578281  | 49.720 |      |      |      |
| 2     | 29.615    | 27191681 | 460860  | 50.280 |      |      |      |
| Total |           | 54080108 | 1039141 |        |      |      |      |

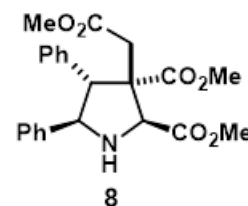

## <Sample Information>

Sample Name : LLC-3-40-4 ADH-10%  
 Sample ID :  
 Data Filename : LLC-3-40-4 ADH-10%.lcd

Method Filename : AD-H; 1 ml; 10%IPA in Hex; 40min.lcm

Batch Filename : 20221007.lcb

Vial # : 1-32

Sample Type : Unknown

Injection Volume : 10 uL

Date Acquired : 1/3/2023 1:45:26 PM

Acquired by : System Administrator

Date Processed : 1/3/2023 2:25:29 PM

Processed by : System Administrator

## <Chromatogram>

mAU

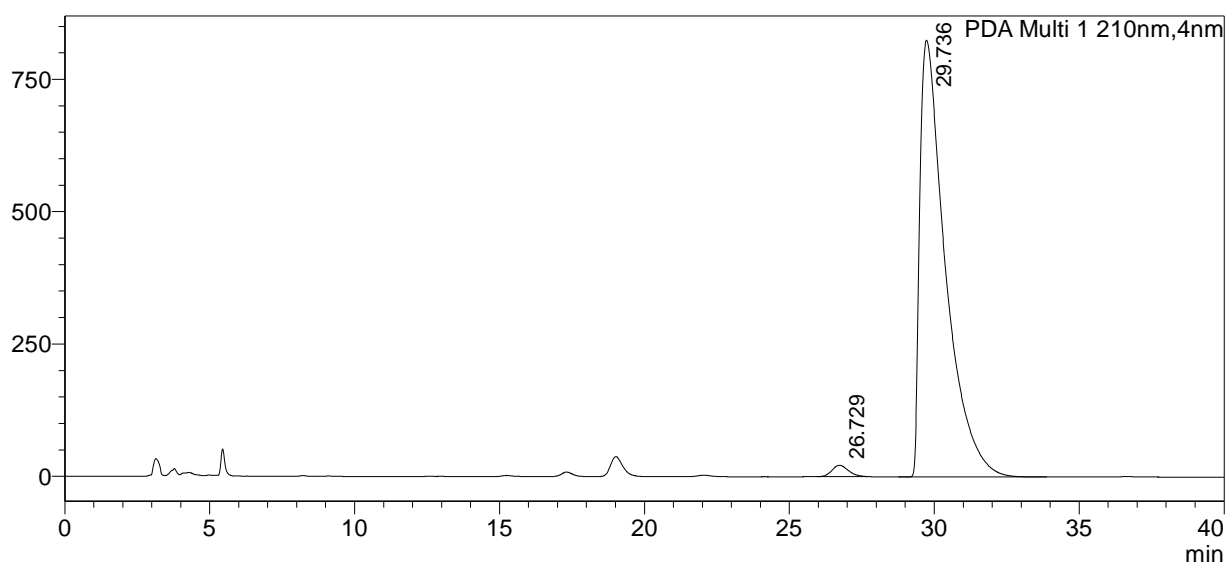

## <Peak Table>

PDA Ch1 210nm

| Peak# | Ret. Time | Area     | Height | Conc.  | Unit | Mark | Name |
|-------|-----------|----------|--------|--------|------|------|------|
| 1     | 26.729    | 836079   | 21366  | 1.626  |      |      |      |
| 2     | 29.736    | 50589539 | 824582 | 98.374 |      |      |      |
| Total |           | 51425618 | 845948 |        |      |      |      |

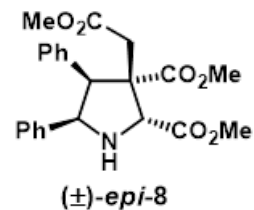

## <Sample Information>

Sample Name : LLC-2-88-a ADH-10%  
 Sample ID :  
 Data Filename : LLC-2-88-a ADH-10%.lcd

Method Filename : AD-H; 1 ml; 10%IPA in Hex; 60min.lcm

Batch Filename : 20221007.lcb

Vial # : 1-31

Sample Type : Unknown

Injection Volume : 10 uL

Date Acquired : 1/31/2023 10:07:24 AM

Acquired by : System Administrator

Date Processed : 1/31/2023 10:41:28 AM

Processed by : System Administrator

## <Chromatogram>

mAU

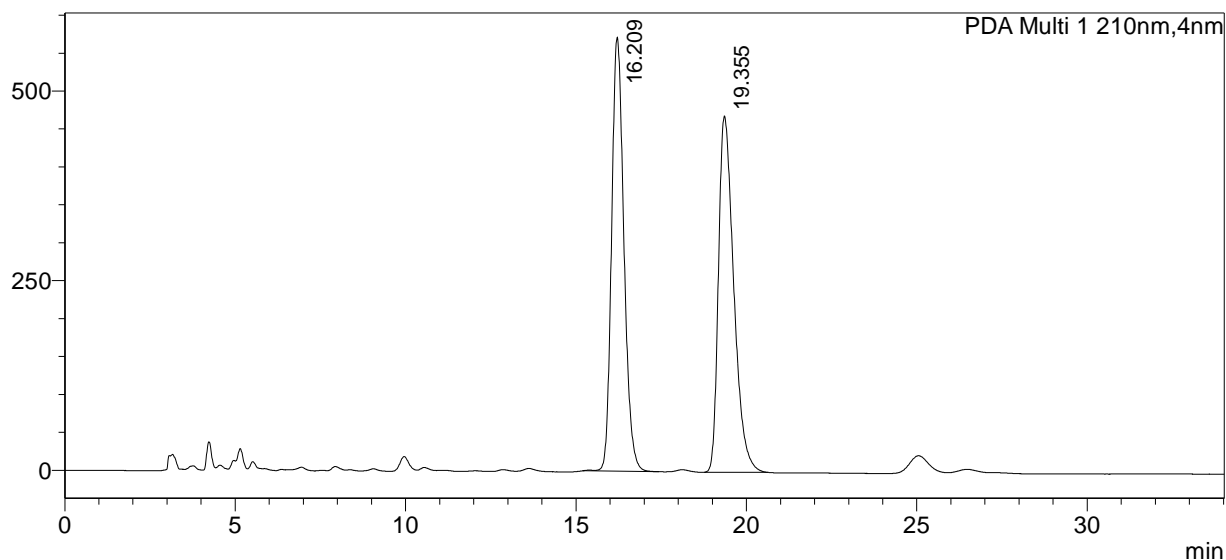

## <Peak Table>

PDA Ch1 210nm

| Peak# | Ret. Time | Area     | Height  | Conc.  | Unit | Mark | Name |
|-------|-----------|----------|---------|--------|------|------|------|
| 1     | 16.209    | 14410223 | 572086  | 49.583 |      |      |      |
| 2     | 19.355    | 14652413 | 469640  | 50.417 |      |      |      |
| Total |           | 29062635 | 1041727 |        |      |      |      |

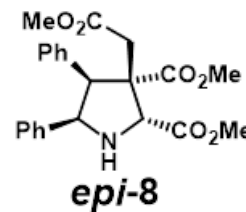

## <Sample Information>

Sample Name : LLC-3-40-1-ap ADH-10%  
 Sample ID :  
 Data Filename : LLC-3-40-1-ap ADH-10%.lcd

Method Filename : AD-H; 1 ml; 10%IPA in Hex; 40min.lcm

Batch Filename : 1.lcb

Vial # : 1-61

Sample Type : Unknown

Injection Volume : 10 uL

Date Acquired : 2/4/2023 6:49:35 PM

Acquired by : System Administrator

Date Processed : 2/4/2023 7:29:37 PM

Processed by : System Administrator

## <Chromatogram>

mAU

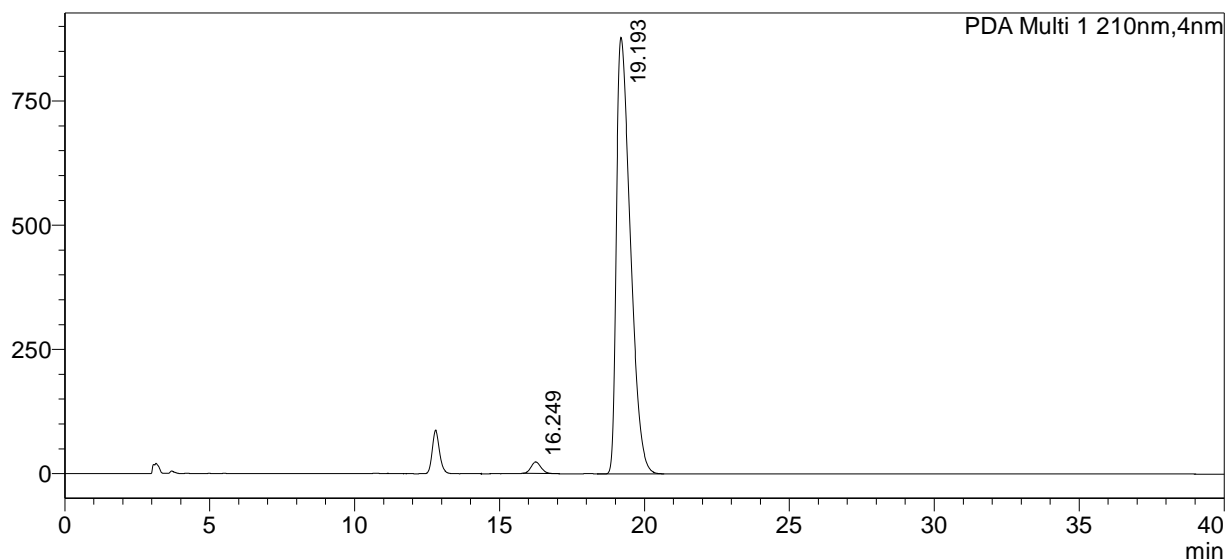

## <Peak Table>

PDA Ch1 210nm

| Peak# | Ret. Time | Area     | Height | Conc.  | Unit | Mark | Name |
|-------|-----------|----------|--------|--------|------|------|------|
| 1     | 16.249    | 556426   | 23397  | 1.855  |      |      |      |
| 2     | 19.193    | 29447624 | 878579 | 98.145 |      |      |      |
| Total |           | 30004050 | 901976 |        |      |      |      |

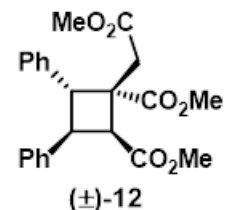

## <Sample Information>

Sample Name : LLC-2-106-a ADH-10%2  
 Sample ID :  
 Data Filename : LLC-2-106-a ADH-10%2.lcd

Method Filename : AD-H; 1 ml; 10%IPA in Hex; 40min.lcm  
 Batch Filename : 20221007.lcb  
 Vial # : 1-16  
 Injection Volume : 10 uL  
 Date Acquired : 1/11/2023 1:52:54 PM  
 Date Processed : 1/11/2023 2:32:57 PM

Sample Type : Unknown  
 Acquired by : System Administrator  
 Processed by : System Administrator

## <Chromatogram>

mAU

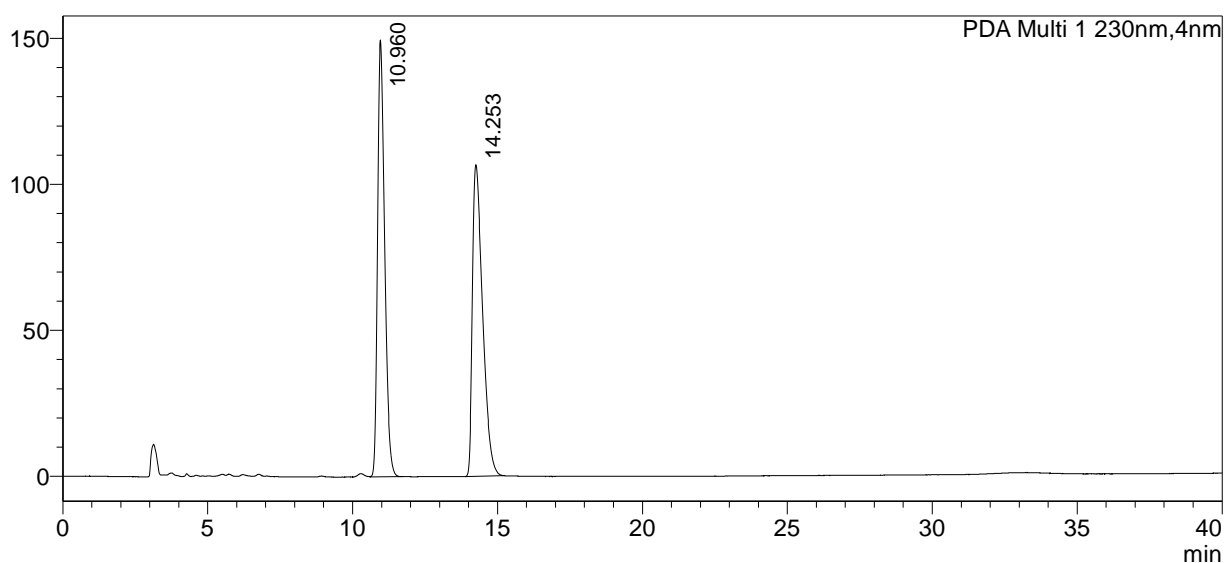

## <Peak Table>

PDA Ch1 230nm

| Peak# | Ret. Time | Area    | Height | Conc.  | Unit | Mark | Name |
|-------|-----------|---------|--------|--------|------|------|------|
| 1     | 10.960    | 2561822 | 149401 | 49.534 |      |      |      |
| 2     | 14.253    | 2610019 | 106702 | 50.466 |      |      |      |
| Total |           | 5171841 | 256104 |        |      |      |      |

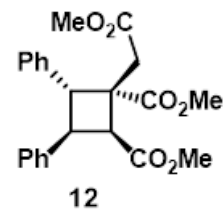

## <Sample Information>

Sample Name : LLC-3-45-ap1 ADH-10%  
 Sample ID :  
 Data Filename : LLC-3-45-ap1 ADH-10%.lcd

Method Filename : AD-H; 1 ml; 10%IPA in Hex; 30min.lcm

Batch Filename : 20221007.lcb

Vial # : 1-17

Sample Type : Unknown

Injection Volume : 10 uL

Date Acquired : 1/12/2023 8:07:53 PM

Acquired by : System Administrator

Date Processed : 1/12/2023 8:37:55 PM

Processed by : System Administrator

## <Chromatogram>

mAU

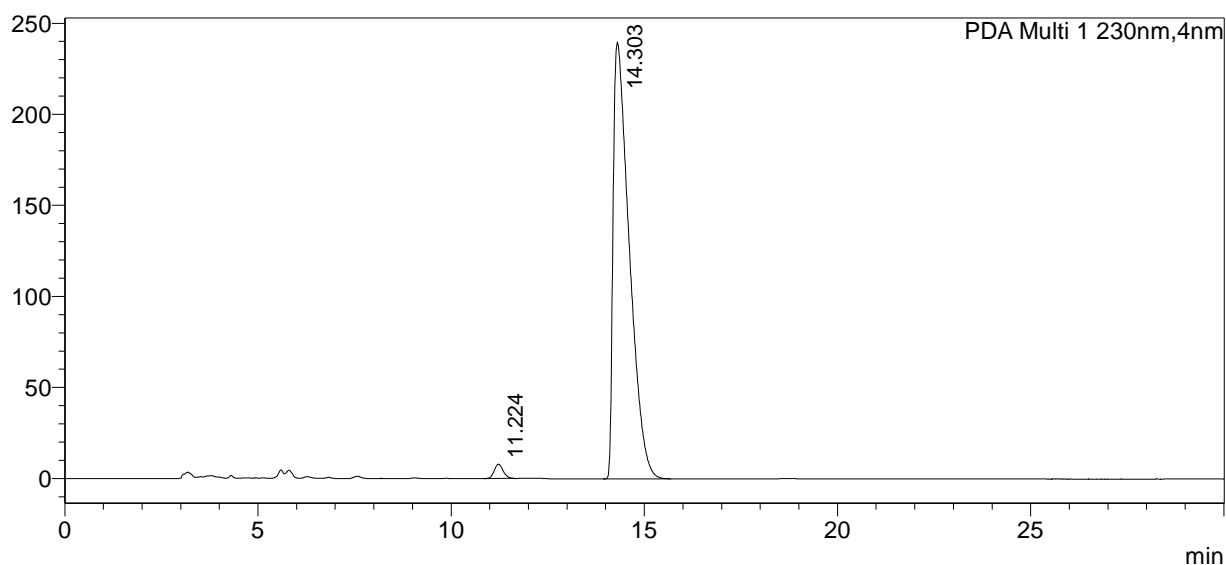

## <Peak Table>

PDA Ch1 230nm

| Peak# | Ret. Time | Area    | Height | Conc.  | Unit | Mark | Name |
|-------|-----------|---------|--------|--------|------|------|------|
| 1     | 11.224    | 124529  | 7814   | 1.753  |      |      |      |
| 2     | 14.303    | 6980772 | 239705 | 98.247 |      |      |      |
| Total |           | 7105301 | 247519 |        |      |      |      |
